# Supplementary material for: The Repertoire of ICE in Prokaryotes Underscores the Unity, Diversity, and Ubiquity of Conjugation
Source: PLoS Genet. 2011 Aug 18;7(8):e1002222. doi: 10.1371/journal.pgen.1002222 (PMC3158045; doi:10.1371/journal.pgen.1002222)
Supplement: Dataset S1 — Excel file with all identified clusters in three sheets: i) clusters in chromosomes; ii) clusters in plasmids sequenced with the chromosome; iii) other plasmids; iv–vi) all proteins with hits, genome position and synonyms. Brief description of the meaning of the different columns (with one example taken from first line of first sheet “Chrom”). 1) Accession number in GenBank (NC_008752), replicon (Acidovorax_avenae_subsp._citrulli_AAC00-1,_complete_genome._), clade (Proteobacteria), restricted clade (Betaproteobacteria), replicon type (circular), replicon size (5352772), number of genes in replicon (4709), presence or absence of T4SS (T4SS), conjugative/mobilizable/non-mobilizable(CONJ), MPF type (G), class including whether it contains T4SS, T4CP, relaxase and MPF type followed by an identification number (T4SS_T4CP_MOB_G_2), start and end of cluster in genome (in terms of genes) (478 and 556). This is followed by a list of columns with the hits for each profile. These hits are under the form e.g. virb4@ACAV001c01_004910&0.81018&3.4e-86, where virb4 is the profile for VirB4, followed by the gene name and the c-value of the hmmer hit. Some cells contain multiple entries corresponding to multiple hits. When the profile was not hit it only shows the profile name, e.g. MOBC. The MPF specific profiles are indicated in the form MPFtype_profile, e.g. F_traW for the TraW of MPFF plasmid profile. (XLS) [file pgen.1002222.s001.xls]

## Sheet: Chrom
id	tax	tax	tax	linear/circular	size	nb genes	T4SS?	mobility		Class	start in genome	end in genome	VirB4	TraU	T4CP_profile1	T4CP_profile2	T4CP_Tn916
NC_008752	Acidovorax_avenae_subsp._citrulli_AAC00-1,_complete_genome._	Proteobacteria;	Betaproteobacteria	circular	5352772	4709	T4SS	CONJ	G	T4SS_T4CP_MOB_G_2	478	556	virb4@ACAV001c01_004910&0.81018&3.4e-86	traU	t4cp1@ACAV001c01_005150&0.990909&1.5e-10	t4cp2@ACAV001c01_005150&0.972973&2.8e-31	t4cp3	MOBC	MOBF	MOBH@ACAV001c01_005560&0.911765&4.4e-41	MOBPHEN	MOBQ	MOBV	MOBT	MOBB	F_traE	F_traH	F_traK	F_traL	F_traN	F_traU	F_traV	F_traW	F_trbC	G_ICEHIN1056_000310@ACAV001c01_005200&0.851485&3.5e-58	G_ICEHIN1056_000410@ACAV001c01_004950&0.959276&3.4e-106	G_ICEHIN1056_000440@ACAV001c01_004920&0.956522&7.1e-61	G_ICEHIN1056_000510@ACAV001c01_004780&0.971554&3e-195	G_ICEHIN1056_000520@ACAV001c01_004790&0.97281&4e-142	I_traI	I_traK	I_traL	I_traM	I_traN	I_traP	I_traQ	I_traR	I_traW	I_traY
NC_008752	Acidovorax_avenae_subsp._citrulli_AAC00-1,_complete_genome._	Proteobacteria;	Betaproteobacteria	circular	5352772	4709	T4SS	CONJ	T	T4SS_T4CP_MOB_T_3	676	718	virb4@ACAV001c01_007130&0.820785&1.8e-177	traU	t4cp1@ACAV001c01_007080&1&1.5e-24	t4cp2@ACAV001c01_007080&1&6.2e-56	t4cp3	MOBC	MOBF	MOBH	MOBPHEN@ACAV001c01_006760&0.738197&1.9e-25	MOBQ	MOBV	MOBT	MOBB	F_traE	F_traH	F_traK	F_traL	F_traN	F_traU	F_traV	F_traW	F_trbC	G_ICEHIN1056_000310	G_ICEHIN1056_000410	G_ICEHIN1056_000440	G_ICEHIN1056_000510	G_ICEHIN1056_000520	I_traI	I_traK	I_traL	I_traM	I_traN	I_traP	I_traQ	I_traR	I_traW	I_traY
NC_008752	Acidovorax_avenae_subsp._citrulli_AAC00-1,_complete_genome._	Proteobacteria;	Betaproteobacteria	circular	5352772	4709	NOT4SS	MOB	O	NOT4SS_NOT4CP_MOB_O_4	2376	2376	virb4	traU	t4cp1	t4cp2	t4cp3	MOBC	MOBF	MOBH	MOBPHEN	MOBQ	MOBV	MOBT@ACAV001c01_023760&0.551913&6.5e-08	MOBB	F_traE	F_traH	F_traK	F_traL	F_traN	F_traU	F_traV	F_traW	F_trbC	G_ICEHIN1056_000310	G_ICEHIN1056_000410	G_ICEHIN1056_000440	G_ICEHIN1056_000510	G_ICEHIN1056_000520	I_traI	I_traK	I_traL	I_traM	I_traN	I_traP	I_traQ	I_traR	I_traW	I_traY
NC_008752	Acidovorax_avenae_subsp._citrulli_AAC00-1,_complete_genome._	Proteobacteria;	Betaproteobacteria	circular	5352772	4709	T4SS	CONJ	G	T4SS_T4CP_MOB_G_5	2734	2754	virb4@ACAV001c01_027370&0.821845&5.8e-79	traU	t4cp1@ACAV001c01_027460&0.963636&2.8e-12	t4cp2@ACAV001c01_027460&0.986486&2.3e-25	t4cp3	MOBC	MOBF	MOBH@ACAV001c01_027540&0.921569&3e-37	MOBPHEN	MOBQ	MOBV	MOBT	MOBB	F_traE	F_traH	F_traK	F_traL	F_traN	F_traU	F_traV	F_traW	F_trbC	G_ICEHIN1056_000310@ACAV001c01_027500&0.613861&1.4e-40	G_ICEHIN1056_000410@ACAV001c01_027410&0.936652&1.7e-89	G_ICEHIN1056_000440@ACAV001c01_027380&0.942029&2.6e-42	G_ICEHIN1056_000510@ACAV001c01_027340&0.978118&1e-125	G_ICEHIN1056_000520@ACAV001c01_027350&0.987915&2.9e-132	I_traI	I_traK	I_traL	I_traM	I_traN	I_traP	I_traQ	I_traR	I_traW	I_traY
NC_009085	Acinetobacter_baumannii_ATCC_17978,_complete_genome._	Proteobacteria;	Gammaproteobacteria	circular	3976747	3352	T4SS	NOMOB	I	T4SS_T4CP_NOMOB_I_6	598	634	virb4	traU@ACBA001c01_006140&0.97123&4e-205	t4cp1	t4cp2@ACBA001c01_006150&0.657658&1.4e-18	t4cp3	MOBC	MOBF	MOBH	MOBPHEN	MOBQ	MOBV	MOBT	MOBB	F_traE	F_traH	F_traK	F_traL	F_traN	F_traU	F_traV	F_traW	F_trbC	G_ICEHIN1056_000310	G_ICEHIN1056_000410	G_ICEHIN1056_000440	G_ICEHIN1056_000510	G_ICEHIN1056_000520	I_traI@ACBA001c01_006120&0.619048&1.9e-43	I_traK	I_traL	I_traM	I_traN@ACBA001c01_006130&0.91369&1e-69	I_traP	I_traQ	I_traR	I_traW@ACBA001c01_005990&0.755556&1e-16@ACBA001c01_005980&0.844444&3.4e-11	I_traY@ACBA001c01_006010&0.872483&2.4e-77
NC_013926	Aciduliprofundum_boonei_T469_chromosome,_complete_genome._	Euryarchaeota;	Euryarchaeota	circular	1486778	1544	T4SS	CONJ	O	T4SS_T4CP_MOB_O_9	1034	1075	virb4@ACBO001c01_010750&0.511135&1.8e-64	traU	t4cp1@ACBO001c01_010350&0.972727&1.8e-13	t4cp2@ACBO001c01_010350&0.855856&1.5e-21	t4cp3	MOBC	MOBF	MOBH	MOBPHEN@ACBO001c01_010340&0.566524&1.1e-06	MOBQ	MOBV	MOBT	MOBB	F_traE	F_traH	F_traK	F_traL	F_traN	F_traU	F_traV	F_traW	F_trbC	G_ICEHIN1056_000310	G_ICEHIN1056_000410	G_ICEHIN1056_000440	G_ICEHIN1056_000510	G_ICEHIN1056_000520	I_traI	I_traK	I_traL	I_traM	I_traN	I_traP	I_traQ	I_traR	I_traW	I_traY
NC_012483	Acidobacterium_capsulatum_ATCC_51196,_complete_genome._	Acidobacteria;	Acidobacteria	circular	4127356	3377	T4SS	CONJ	T	T4SS_T4CP_MOB_T_10	1136	1148	virb4@ACCA001c01_011370&0.780488&5.1e-132	traU	t4cp1@ACCA001c01_011470&0.972727&2.6e-11	t4cp2@ACCA001c01_011470&0.828829&6.2e-30	t4cp3	MOBC	MOBF@ACCA001c01_011480&0.995455&6.5e-199	MOBH	MOBPHEN	MOBQ	MOBV	MOBT	MOBB	F_traE	F_traH	F_traK	F_traL	F_traN	F_traU	F_traV	F_traW	F_trbC	G_ICEHIN1056_000310	G_ICEHIN1056_000410	G_ICEHIN1056_000440	G_ICEHIN1056_000510	G_ICEHIN1056_000520	I_traI	I_traK	I_traL	I_traM	I_traN	I_traP	I_traQ	I_traR	I_traW	I_traY
NC_012483	Acidobacterium_capsulatum_ATCC_51196,_complete_genome._	Acidobacteria;	Acidobacteria	circular	4127356	3377	T4SS	CONJ	T	T4SS_T4CP_MOB_T_11B	3059	3074	virb4@ACCA001c01_030600&0.782609&5.5e-107	traU	t4cp1@ACCA001c01_030730&0.963636&2.9e-11	t4cp2@ACCA001c01_030730&0.869369&7.6e-28	t4cp3	MOBC	MOBF@ACCA001c01_030740&0.997727&4.3e-196	MOBH	MOBPHEN	MOBQ	MOBV	MOBT	MOBB	F_traE	F_traH	F_traK	F_traL	F_traN	F_traU	F_traV	F_traW	F_trbC	G_ICEHIN1056_000310	G_ICEHIN1056_000410	G_ICEHIN1056_000440	G_ICEHIN1056_000510	G_ICEHIN1056_000520	I_traI	I_traK	I_traL	I_traM	I_traN	I_traP	I_traQ	I_traR	I_traW	I_traY
NC_012483	Acidobacterium_capsulatum_ATCC_51196,_complete_genome._	Acidobacteria;	Acidobacteria	circular	4127356	3377	T4SS	CONJ	T	T4SS_T4CP_MOB_T_11A	3127	3150	virb4@ACCA001c01_031490&0.792153&5.3e-108	traU	t4cp1@ACCA001c01_031270&0.963636&8.1e-12	t4cp2@ACCA001c01_031270&0.864865&3e-25	t4cp3	MOBC	MOBF@ACCA001c01_031280&0.997727&4.4e-199	MOBH	MOBPHEN	MOBQ	MOBV	MOBT	MOBB	F_traE	F_traH	F_traK	F_traL	F_traN	F_traU	F_traV	F_traW	F_trbC	G_ICEHIN1056_000310	G_ICEHIN1056_000410	G_ICEHIN1056_000440	G_ICEHIN1056_000510	G_ICEHIN1056_000520	I_traI	I_traK	I_traL	I_traM	I_traN	I_traP@ACCA001c01_031090&0.702929&2.4e-06	I_traQ	I_traR	I_traW	I_traY
NC_009484	Acidiphilium_cryptum_JF-5,_complete_genome._	Proteobacteria;	Alphaproteobacteria	circular	3389227	3063	NOT4SS	MOB	O	NOT4SS_T4CP_MOB_O_13	2435	2436	virb4	traU	t4cp1@ACCR001c01_024360&0.981818&8.5e-12	t4cp2@ACCR001c01_024360&0.833333&4.3e-30	t4cp3	MOBC	MOBF@ACCR001c01_024350&0.997727&2.6e-214	MOBH	MOBPHEN	MOBQ	MOBV	MOBT	MOBB	F_traE	F_traH	F_traK	F_traL	F_traN	F_traU	F_traV	F_traW	F_trbC	G_ICEHIN1056_000310	G_ICEHIN1056_000410	G_ICEHIN1056_000440	G_ICEHIN1056_000510	G_ICEHIN1056_000520	I_traI	I_traK	I_traL	I_traM	I_traN	I_traP	I_traQ	I_traR	I_traW	I_traY
NC_011206	Acidithiobacillus_ferrooxidans_ATCC_53993,_complete_genome._	Proteobacteria;	Gammaproteobacteria	circular	2885038	2826	T4SS	CONJ	T	T4SS_T4CP_MOB_T_14	239	259	virb4@ACFE001c01_002440&0.822906&7.1e-170	traU	t4cp1@ACFE001c01_002590&1&1.4e-23	t4cp2@ACFE001c01_002590&1&1.3e-56	t4cp3	MOBC	MOBF	MOBH	MOBPHEN@ACFE001c01_002390&0.703863&1.9e-14	MOBQ	MOBV	MOBT	MOBB	F_traE	F_traH	F_traK	F_traL	F_traN	F_traU	F_traV	F_traW	F_trbC	G_ICEHIN1056_000310	G_ICEHIN1056_000410	G_ICEHIN1056_000440	G_ICEHIN1056_000510	G_ICEHIN1056_000520	I_traI	I_traK	I_traL	I_traM	I_traN	I_traP	I_traQ	I_traR	I_traW	I_traY
NC_011206	Acidithiobacillus_ferrooxidans_ATCC_53993,_complete_genome._	Proteobacteria;	Gammaproteobacteria	circular	2885038	2826	T4SS	CONJ	T	T4SS_T4CP_MOB_T_15	1309	1392	virb4@ACFE001c01_013340&0.822906&7.1e-170	traU	t4cp1@ACFE001c01_013920&1&1.5e-23	t4cp2@ACFE001c01_013920&1&1.4e-56	t4cp3	MOBC	MOBF	MOBH	MOBPHEN@ACFE001c01_013160&0.699571&3e-15	MOBQ	MOBV	MOBT	MOBB	F_traE	F_traH	F_traK	F_traL	F_traN	F_traU	F_traV	F_traW	F_trbC	G_ICEHIN1056_000310	G_ICEHIN1056_000410	G_ICEHIN1056_000440	G_ICEHIN1056_000510	G_ICEHIN1056_000520	I_traI	I_traK	I_traL	I_traM	I_traN	I_traP	I_traQ	I_traR	I_traW	I_traY
NC_011206	Acidithiobacillus_ferrooxidans_ATCC_53993,_complete_genome._	Proteobacteria;	Gammaproteobacteria	circular	2885038	2826	NOT4SS	MOB	O	NOT4SS_NOT4CP_MOB_O_16	2040	2040	virb4	traU	t4cp1	t4cp2	t4cp3	MOBC	MOBF	MOBH	MOBPHEN	MOBQ	MOBV@ACFE001c01_020400&0.897059&7.2e-18	MOBT	MOBB	F_traE	F_traH	F_traK	F_traL	F_traN	F_traU	F_traV	F_traW	F_trbC	G_ICEHIN1056_000310	G_ICEHIN1056_000410	G_ICEHIN1056_000440	G_ICEHIN1056_000510	G_ICEHIN1056_000520	I_traI	I_traK	I_traL	I_traM	I_traN	I_traP	I_traQ	I_traR	I_traW	I_traY
NC_011761	Acidithiobacillus_ferrooxidans_ATCC_23270,_complete_genome._	Proteobacteria;	Gammaproteobacteria	circular	2982397	3147	T4SS	NOMOB	F	T4SS_NOT4CP_NOMOB_F_17	1046	1075	virb4@ACFE002c01_010680&0.811241&5.8e-99	traU	t4cp1	t4cp2	t4cp3	MOBC	MOBF	MOBH	MOBPHEN	MOBQ	MOBV	MOBT	MOBB	F_traE@ACFE002c01_010580&0.953368&4e-31	F_traH@ACFE002c01_010460&0.559653&2.8e-41	F_traK@ACFE002c01_010590&0.741007&2.9e-39	F_traL@ACFE002c01_010570&0.97&9.8e-18	F_traN	F_traU@ACFE002c01_010750&0.967066&5.6e-78	F_traV@ACFE002c01_010610&0.591837&5.4e-24	F_traW@ACFE002c01_010740&0.834906&2.2e-28	F_trbC@ACFE002c01_010740&0.681223&8.2e-18	G_ICEHIN1056_000310	G_ICEHIN1056_000410	G_ICEHIN1056_000440	G_ICEHIN1056_000510	G_ICEHIN1056_000520	I_traI	I_traK	I_traL	I_traM	I_traN	I_traP	I_traQ	I_traR	I_traW	I_traY
NC_011761	Acidithiobacillus_ferrooxidans_ATCC_23270,_complete_genome._	Proteobacteria;	Gammaproteobacteria	circular	2982397	3147	T4SS	CONJ	T	T4SS_T4CP_MOB_T_19	1587	1663	virb4@ACFE002c01_016030&0.821845&1.1e-168	traU	t4cp1@ACFE002c01_016630&1&1.5e-23	t4cp2@ACFE002c01_016630&1&1.4e-56	t4cp3	MOBC	MOBF	MOBH	MOBPHEN@ACFE002c01_015870&0.703863&9.5e-15	MOBQ	MOBV	MOBT	MOBB	F_traE	F_traH	F_traK	F_traL	F_traN	F_traU	F_traV	F_traW	F_trbC	G_ICEHIN1056_000310	G_ICEHIN1056_000410	G_ICEHIN1056_000440	G_ICEHIN1056_000510	G_ICEHIN1056_000520	I_traI	I_traK	I_traL	I_traM	I_traN	I_traP	I_traQ	I_traR	I_traW	I_traY
NC_011761	Acidithiobacillus_ferrooxidans_ATCC_23270,_complete_genome._	Proteobacteria;	Gammaproteobacteria	circular	2982397	3147	NOT4SS	MOB	O	NOT4SS_NOT4CP_MOB_O_20	2363	2363	virb4	traU	t4cp1	t4cp2	t4cp3	MOBC	MOBF	MOBH	MOBPHEN	MOBQ	MOBV@ACFE002c01_023630&0.897059&7.2e-18	MOBT	MOBB	F_traE	F_traH	F_traK	F_traL	F_traN	F_traU	F_traV	F_traW	F_trbC	G_ICEHIN1056_000310	G_ICEHIN1056_000410	G_ICEHIN1056_000440	G_ICEHIN1056_000510	G_ICEHIN1056_000520	I_traI	I_traK	I_traL	I_traM	I_traN	I_traP	I_traQ	I_traR	I_traW	I_traY
NC_008782	Acidovorax_sp._JS42,_complete_genome._	Proteobacteria;	Betaproteobacteria	circular	4448856	4007	T4SS	CONJ	G	T4SS_T4CP_MOB_G_21	1228	1262	virb4@ACJS001c01_012390&0.820785&1e-90	traU	t4cp1@ACJS001c01_012570&0.990909&1.9e-10	t4cp2@ACJS001c01_012570&0.972973&2.1e-30	t4cp3	MOBC	MOBF	MOBH@ACJS001c01_012280&0.906863&6.9e-43	MOBPHEN	MOBQ	MOBV	MOBT	MOBB	F_traE	F_traH	F_traK	F_traL	F_traN	F_traU	F_traV	F_traW	F_trbC	G_ICEHIN1056_000310@ACJS001c01_012620&0.866337&2.2e-71	G_ICEHIN1056_000410@ACJS001c01_012430&0.963801&6.7e-110	G_ICEHIN1056_000440@ACJS001c01_012400&0.985507&1.3e-63	G_ICEHIN1056_000510@ACJS001c01_012340&0.989059&5.3e-204	G_ICEHIN1056_000520@ACJS001c01_012350&0.993958&8.5e-151	I_traI	I_traK	I_traL	I_traM	I_traN	I_traP	I_traQ	I_traR	I_traW	I_traY
NC_008782	Acidovorax_sp._JS42,_complete_genome._	Proteobacteria;	Betaproteobacteria	circular	4448856	4007	T4SS	CONJ	G	T4SS_T4CP_MOB_G_22	1363	1389	virb4@ACJS001c01_013740&0.820785&9.3e-92	traU	t4cp1@ACJS001c01_013840&0.990909&1.9e-10	t4cp2@ACJS001c01_013840&0.977477&2e-30	t4cp3	MOBC	MOBF	MOBH@ACJS001c01_013630&0.911765&7.5e-41	MOBPHEN	MOBQ	MOBV	MOBT	MOBB	F_traE	F_traH	F_traK	F_traL	F_traN	F_traU	F_traV	F_traW	F_trbC	G_ICEHIN1056_000310@ACJS001c01_013890&0.970297&1.5e-74	G_ICEHIN1056_000410@ACJS001c01_013780&0.963801&6.7e-110	G_ICEHIN1056_000440@ACJS001c01_013750&0.978261&1.9e-65	G_ICEHIN1056_000510@ACJS001c01_013690&0.991247&6.2e-206	G_ICEHIN1056_000520@ACJS001c01_013700&0.993958&6.8e-150	I_traI	I_traK	I_traL	I_traM	I_traN	I_traP	I_traQ	I_traR	I_traW	I_traY
NC_008782	Acidovorax_sp._JS42,_complete_genome._	Proteobacteria;	Betaproteobacteria	circular	4448856	4007	T4SS	CONJ	F	T4SS_T4CP_MOB_F_23	1479	1504	virb4@ACJS001c01_014890&0.808059&9.8e-116	traU	t4cp1@ACJS001c01_015030&0.845455&9.5e-08	t4cp2@ACJS001c01_015030&0.986486&2.9e-25	t4cp3	MOBC	MOBF	MOBH@ACJS001c01_015040&0.985294&2.9e-46	MOBPHEN	MOBQ	MOBV	MOBT	MOBB	F_traE@ACJS001c01_014940&0.948187&2.5e-38	F_traH@ACJS001c01_014790&0.947939&1.2e-85	F_traK@ACJS001c01_014930&0.622302&4.5e-26	F_traL@ACJS001c01_014950&0.97&8.7e-22	F_traN@ACJS001c01_014820&0.928244&2.9e-81	F_traU@ACJS001c01_014840&0.97006&7e-123	F_traV@ACJS001c01_014900&0.746939&1.7e-31	F_traW@ACJS001c01_014850&0.948113&8.1e-66	F_trbC@ACJS001c01_014830&0.812227&2.9e-40	G_ICEHIN1056_000310	G_ICEHIN1056_000410	G_ICEHIN1056_000440	G_ICEHIN1056_000510	G_ICEHIN1056_000520	I_traI	I_traK	I_traL	I_traM	I_traN	I_traP	I_traQ	I_traR	I_traW	I_traY
NC_008782	Acidovorax_sp._JS42,_complete_genome._	Proteobacteria;	Betaproteobacteria	circular	4448856	4007	T4SS	CONJ	G	T4SS_T4CP_MOB_G_24	2111	2149	virb4@ACJS001c01_021220&0.830329&2.3e-95	traU	t4cp1@ACJS001c01_021440&0.990909&7.8e-11	t4cp2@ACJS001c01_021440&0.977477&4.5e-31	t4cp3	MOBC	MOBF	MOBH@ACJS001c01_021110&0.897059&7.7e-43	MOBPHEN	MOBQ	MOBV	MOBT	MOBB	F_traE	F_traH	F_traK	F_traL	F_traN	F_traU	F_traV	F_traW	F_trbC	G_ICEHIN1056_000310@ACJS001c01_021490&0.89604&2.1e-61	G_ICEHIN1056_000410@ACJS001c01_021260&0.959276&4.8e-109	G_ICEHIN1056_000440@ACJS001c01_021230&0.992754&1.8e-64	G_ICEHIN1056_000510@ACJS001c01_021170&0.986871&2.1e-194	G_ICEHIN1056_000520@ACJS001c01_021180&0.978852&2.5e-148	I_traI	I_traK	I_traL	I_traM	I_traN	I_traP	I_traQ	I_traR	I_traW	I_traY
NC_008782	Acidovorax_sp._JS42,_complete_genome._	Proteobacteria;	Betaproteobacteria	circular	4448856	4007	T4SS	NOMOB	T	T4SS_T4CP_NOMOB_T_26	2827	2837	virb4@ACJS001c01_028320&0.815483&1.9e-178	traU	t4cp1@ACJS001c01_028370&1&9e-25	t4cp2@ACJS001c01_028370&1&4.2e-56	t4cp3	MOBC	MOBF	MOBH	MOBPHEN	MOBQ	MOBV	MOBT	MOBB	F_traE	F_traH	F_traK	F_traL	F_traN	F_traU	F_traV	F_traW	F_trbC	G_ICEHIN1056_000310	G_ICEHIN1056_000410	G_ICEHIN1056_000440	G_ICEHIN1056_000510	G_ICEHIN1056_000520	I_traI	I_traK	I_traL	I_traM	I_traN	I_traP	I_traQ	I_traR	I_traW	I_traY
NC_013093	Actinosynnema_mirum_DSM_43827,_complete_genome._	Actinobacteria;	FA	circular	8248144	6916	T4SS	NOMOB	O	T4SS_NOT4CP_NOMOB_O_27	893	893	virb4@ACMI001c01_008930&0.681866&7.6e-12	traU	t4cp1	t4cp2	t4cp3	MOBC	MOBF	MOBH	MOBPHEN	MOBQ	MOBV	MOBT	MOBB	F_traE	F_traH	F_traK	F_traL	F_traN	F_traU	F_traV	F_traW	F_trbC	G_ICEHIN1056_000310	G_ICEHIN1056_000410	G_ICEHIN1056_000440	G_ICEHIN1056_000510	G_ICEHIN1056_000520	I_traI	I_traK	I_traL	I_traM	I_traN	I_traP	I_traQ	I_traR	I_traW	I_traY
NC_013209	Acetobacter_pasteurianus_IFO_3283-01,_complete_genome._	Proteobacteria;	Alphaproteobacteria	circular	2907495	2628	NOT4SS	MOB	O	NOT4SS_NOT4CP_MOB_O_28	171	171	virb4	traU	t4cp1	t4cp2	t4cp3	MOBC	MOBF	MOBH	MOBPHEN@ACPA001c01_001710&0.905579&4.9e-08	MOBQ	MOBV	MOBT	MOBB	F_traE	F_traH	F_traK	F_traL	F_traN	F_traU	F_traV	F_traW	F_trbC	G_ICEHIN1056_000310	G_ICEHIN1056_000410	G_ICEHIN1056_000440	G_ICEHIN1056_000510	G_ICEHIN1056_000520	I_traI	I_traK	I_traL	I_traM	I_traN	I_traP	I_traQ	I_traR	I_traW	I_traY
NC_009348	Aeromonas_salmonicida_subsp._salmonicida_A449,_complete_genome._	Proteobacteria;	Gammaproteobacteria	circular	4702402	4086	NOT4SS	MOB	O	NOT4SS_NOT4CP_MOB_O_35	3526	3526	virb4	traU	t4cp1	t4cp2	t4cp3	MOBC	MOBF	MOBH	MOBPHEN	MOBQ	MOBV@AESA001c01_035260&0.911765&7.7e-17	MOBT	MOBB	F_traE	F_traH	F_traK	F_traL	F_traN	F_traU	F_traV	F_traW	F_trbC	G_ICEHIN1056_000310	G_ICEHIN1056_000410	G_ICEHIN1056_000440	G_ICEHIN1056_000510	G_ICEHIN1056_000520	I_traI	I_traK	I_traL	I_traM	I_traN	I_traP	I_traQ	I_traR	I_traW	I_traY
NC_013416	Aggregatibacter_actinomycetemcomitans_D11S-1,_complete_genome._	Proteobacteria;	Gammaproteobacteria	circular	2105764	2134	NOT4SS	MOB	O	NOT4SS_NOT4CP_MOB_O_37	901	901	virb4	traU	t4cp1	t4cp2	t4cp3	MOBC	MOBF	MOBH@AGAC001c01_009010&0.681373&2.3e-47	MOBPHEN	MOBQ	MOBV	MOBT	MOBB	F_traE	F_traH	F_traK	F_traL	F_traN	F_traU	F_traV	F_traW	F_trbC	G_ICEHIN1056_000310	G_ICEHIN1056_000410	G_ICEHIN1056_000440	G_ICEHIN1056_000510	G_ICEHIN1056_000520	I_traI	I_traK	I_traL	I_traM	I_traN	I_traP	I_traQ	I_traR	I_traW	I_traY
NC_013416	Aggregatibacter_actinomycetemcomitans_D11S-1,_complete_genome._	Proteobacteria;	Gammaproteobacteria	circular	2105764	2134	T4SS	NOMOB	O	T4SS_NOT4CP_NOMOB_O_38	1030	1031	virb4@AGAC001c01_010310&0.504772&1.1e-142	traU	t4cp1	t4cp2	t4cp3	MOBC	MOBF	MOBH	MOBPHEN	MOBQ	MOBV	MOBT	MOBB	F_traE	F_traH	F_traK	F_traL	F_traN	F_traU	F_traV	F_traW	F_trbC	G_ICEHIN1056_000310	G_ICEHIN1056_000410	G_ICEHIN1056_000440	G_ICEHIN1056_000510	G_ICEHIN1056_000520	I_traI	I_traK	I_traL	I_traM	I_traN	I_traP	I_traQ	I_traR	I_traW	I_traY
NC_012913	Aggregatibacter_aphrophilus_NJ8700,_complete_genome._	Proteobacteria;	Gammaproteobacteria	circular	2313035	2219	NOT4SS	MOB	O	NOT4SS_NOT4CP_MOB_O_39	991	991	virb4	traU	t4cp1	t4cp2	t4cp3	MOBC	MOBF	MOBH@AGAP001c01_009910&0.970588&7.9e-52	MOBPHEN	MOBQ	MOBV	MOBT	MOBB	F_traE	F_traH	F_traK	F_traL	F_traN	F_traU	F_traV	F_traW	F_trbC	G_ICEHIN1056_000310	G_ICEHIN1056_000410	G_ICEHIN1056_000440	G_ICEHIN1056_000510	G_ICEHIN1056_000520	I_traI	I_traK	I_traL	I_traM	I_traN	I_traP	I_traQ	I_traR	I_traW	I_traY
NC_011985	Agrobacterium_radiobacter_K84_chromosome_1,_complete_genome._	Proteobacteria;	Alphaproteobacteria	circular	4005130	3744	T4SS	CONJ	T	T4SS_T4CP_MOB_T_44	3661	3699	virb4@AGRA001c01_036790&0.818664&4.1e-234	traU	t4cp1@AGRA001c01_036990&0.990909&5.1e-22	t4cp2@AGRA001c01_036990&1&3.4e-49	t4cp3	MOBC	MOBF@AGRA001c01_036610&0.622727&2.2e-76	MOBH	MOBPHEN	MOBQ@AGRA001c01_036610&0.995392&3.9e-71	MOBV	MOBT	MOBB	F_traE	F_traH	F_traK	F_traL	F_traN	F_traU	F_traV	F_traW	F_trbC	G_ICEHIN1056_000310	G_ICEHIN1056_000410	G_ICEHIN1056_000440	G_ICEHIN1056_000510	G_ICEHIN1056_000520	I_traI	I_traK	I_traL	I_traM	I_traN	I_traP	I_traQ	I_traR	I_traW	I_traY
NC_003063	Agrobacterium_tumefaciens_str._C58_chromosome_linear,_complete_sequence._	Proteobacteria;	Alphaproteobacteria	linear	2075577	1851	NOT4SS	MOB	O	NOT4SS_T4CP_MOB_O_46	1831	1834	virb4	traU	t4cp1@AGTU001c02_018340&0.990909&3.5e-22	t4cp2@AGTU001c02_018340&1&1.4e-49	t4cp3	MOBC	MOBF@AGTU001c02_018310&0.664773&9.5e-96	MOBH	MOBPHEN	MOBQ@AGTU001c02_018310&1&3e-74	MOBV@AGTU001c02_018310&0.529412&2.4e-05	MOBT	MOBB	F_traE	F_traH	F_traK	F_traL	F_traN	F_traU	F_traV	F_traW	F_trbC	G_ICEHIN1056_000310	G_ICEHIN1056_000410	G_ICEHIN1056_000440	G_ICEHIN1056_000510	G_ICEHIN1056_000520	I_traI	I_traK	I_traL	I_traM	I_traN	I_traP	I_traQ	I_traR	I_traW	I_traY
NC_011989	Agrobacterium_vitis_S4_chromosome_1,_complete_genome._	Proteobacteria;	Alphaproteobacteria	circular	3726375	3234	NOT4SS	MOB	O	NOT4SS_T4CP_MOB_O_48	530	531	virb4	traU	t4cp1@AGVI001c01_005300&0.981818&9.9e-24	t4cp2@AGVI001c01_005300&1&1e-48	t4cp3	MOBC	MOBF@AGVI001c01_005310&0.585227&1.7e-66&1.6e-21	MOBH	MOBPHEN	MOBQ@AGVI001c01_005310&1&1.2e-70	MOBV@AGVI001c01_005310&0.529412&0.00068	MOBT	MOBB	F_traE	F_traH	F_traK	F_traL	F_traN	F_traU	F_traV	F_traW	F_trbC	G_ICEHIN1056_000310	G_ICEHIN1056_000410	G_ICEHIN1056_000440	G_ICEHIN1056_000510	G_ICEHIN1056_000520	I_traI	I_traK	I_traL	I_traM	I_traN	I_traP	I_traQ	I_traR	I_traW	I_traY
NC_013205	Alicyclobacillus_acidocaldarius_subsp._acidocaldarius_DSM_446,_complete_genome._	Firmicutes;	FA	circular	3018755	2888	T4SS	NOMOB	O	T4SS_T4CP_NOMOB_O_51	590	627	virb4@ALAC001c01_005900&0.514316&7.2e-34	traU	t4cp1@ALAC001c01_005900&0.863636&3.6e-05	t4cp2@ALAC001c01_006270&0.567568&5.4e-10	t4cp3	MOBC	MOBF	MOBH	MOBPHEN	MOBQ	MOBV	MOBT	MOBB	F_traE	F_traH	F_traK	F_traL	F_traN	F_traU	F_traV	F_traW	F_trbC	G_ICEHIN1056_000310	G_ICEHIN1056_000410	G_ICEHIN1056_000440	G_ICEHIN1056_000510	G_ICEHIN1056_000520	I_traI	I_traK	I_traL	I_traM	I_traN	I_traP	I_traQ	I_traR	I_traW	I_traY
NC_013205	Alicyclobacillus_acidocaldarius_subsp._acidocaldarius_DSM_446,_complete_genome._	Firmicutes;	Firmicutes	circular	3018755	2888	T4SS	NOMOB	O	T4SS_T4CP_NOMOB_O_52	1175	1191	virb4@ALAC001c01_011750&0.688229&3.3e-22	traU	t4cp1	t4cp2@ALAC001c01_011910&0.585586&3e-09	t4cp3	MOBC	MOBF	MOBH	MOBPHEN	MOBQ	MOBV	MOBT	MOBB	F_traE	F_traH	F_traK	F_traL	F_traN	F_traU	F_traV	F_traW	F_trbC	G_ICEHIN1056_000310	G_ICEHIN1056_000410	G_ICEHIN1056_000440	G_ICEHIN1056_000510	G_ICEHIN1056_000520	I_traI	I_traK	I_traL	I_traM	I_traN	I_traP	I_traQ	I_traR	I_traW	I_traY
NC_008260	Alcanivorax_borkumensis_SK2,_complete_genome._	Proteobacteria;	Gammaproteobacteria	circular	3120143	2755	NOT4SS	MOB	O	NOT4SS_NOT4CP_MOB_O_55	2113	2120	virb4	traU	t4cp1	t4cp2	t4cp3	MOBC	MOBF	MOBH	MOBPHEN@ALBO001c01_021130&0.759657&7e-25	MOBQ	MOBV	MOBT	MOBB	F_traE	F_traH	F_traK	F_traL	F_traN	F_traU	F_traV	F_traW	F_trbC	G_ICEHIN1056_000310	G_ICEHIN1056_000410	G_ICEHIN1056_000440	G_ICEHIN1056_000510	G_ICEHIN1056_000520	I_traI	I_traK	I_traL	I_traM	I_traN	I_traP	I_traQ	I_traR	I_traW	I_traY
NC_011138	Alteromonas_macleodii_'Deep_ecotype',_complete_genome._	Proteobacteria;	Gammaproteobacteria	circular	4412282	4072	NOT4SS	MOB	O	NOT4SS_NOT4CP_MOB_O_59	3634	3634	virb4	traU	t4cp1	t4cp2	t4cp3	MOBC@ALMA001c01_036340&0.777251&5.6e-07	MOBF	MOBH	MOBPHEN	MOBQ	MOBV	MOBT	MOBB	F_traE	F_traH	F_traK	F_traL	F_traN	F_traU	F_traV	F_traW	F_trbC	G_ICEHIN1056_000310	G_ICEHIN1056_000410	G_ICEHIN1056_000440	G_ICEHIN1056_000510	G_ICEHIN1056_000520	I_traI	I_traK	I_traL	I_traM	I_traN	I_traP	I_traQ	I_traR	I_traW	I_traY
NC_009633	Alkaliphilus_metalliredigens_QYMF,_complete_genome._	Firmicutes;	Firmicutes	circular	4929566	4625	NOT4SS	MOB	O	NOT4SS_NOT4CP_MOB_O_60	3864	3864	virb4	traU	t4cp1	t4cp2	t4cp3	MOBC	MOBF	MOBH	MOBPHEN@ALME001c01_038640&0.824034&4.5e-28	MOBQ	MOBV	MOBT	MOBB	F_traE	F_traH	F_traK	F_traL	F_traN	F_traU	F_traV	F_traW	F_trbC	G_ICEHIN1056_000310	G_ICEHIN1056_000410	G_ICEHIN1056_000440	G_ICEHIN1056_000510	G_ICEHIN1056_000520	I_traI	I_traK	I_traL	I_traM	I_traN	I_traP	I_traQ	I_traR	I_traW	I_traY
NC_009922	Alkaliphilus_oremlandii_OhILAs,_complete_genome._	Firmicutes;	Firmicutes	circular	3123558	2836	T4SS	CONJ	O	T4SS_T4CP_MOB_O_61	1906	1941	virb4@ALOR001c01_019060&0.566278&8.1e-69	traU	t4cp1@ALOR001c01_019390&0.990909&2.5e-14	t4cp2@ALOR001c01_019390&0.905405&5.8e-49	t4cp3	MOBC	MOBF	MOBH	MOBPHEN@ALOR001c01_019410&0.927039&4.7e-33	MOBQ	MOBV	MOBT	MOBB	F_traE	F_traH	F_traK	F_traL	F_traN	F_traU	F_traV	F_traW	F_trbC	G_ICEHIN1056_000310	G_ICEHIN1056_000410	G_ICEHIN1056_000440	G_ICEHIN1056_000510	G_ICEHIN1056_000520	I_traI	I_traK	I_traL	I_traM	I_traN	I_traP	I_traQ	I_traR	I_traW	I_traY
NC_013385	Ammonifex_degensii_KC4,_complete_genome._	Firmicutes;	Firmicutes	circular	2129237	2052	T4SS	NOMOB	O	T4SS_T4CP_NOMOB_O_66_O_67	725	811	virb4@AMDE001c01_007250&0.539767&1.8e-90	traU	t4cp1@AMDE001c01_008110&0.981818&1.1e-16	t4cp2@AMDE001c01_008110&0.972973&3e-37	t4cp3	MOBC	MOBF	MOBH	MOBPHEN	MOBQ	MOBV	MOBT	MOBB	F_traE	F_traH	F_traK	F_traL	F_traN	F_traU	F_traV	F_traW	F_trbC	G_ICEHIN1056_000310	G_ICEHIN1056_000410	G_ICEHIN1056_000440	G_ICEHIN1056_000510	G_ICEHIN1056_000520	I_traI	I_traK	I_traL	I_traM	I_traN	I_traP	I_traQ	I_traR	I_traW	I_traY
NC_013532	Anaplasma_centrale_str._Israel,_complete_genome._	Proteobacteria;	Alphaproteobacteria	circular	1206806	923	T4SS	NOMOB	T	T4SS_T4CP_NOMOB_T_71_O_69_70_72	71	935	virb4@ANCE001c01_004240&0.811241&5.3e-199@ANCE001c01_002480&0.815483&1.3e-88	traU	t4cp1@ANCE001c01_000750&0.990909&6.5e-27	t4cp2@ANCE001c01_000750&1&3.7e-53	t4cp3	MOBC	MOBF	MOBH	MOBPHEN	MOBQ	MOBV	MOBT	MOBB	F_traE	F_traH	F_traK	F_traL	F_traN	F_traU	F_traV	F_traW	F_trbC	G_ICEHIN1056_000310	G_ICEHIN1056_000410	G_ICEHIN1056_000440	G_ICEHIN1056_000510	G_ICEHIN1056_000520	I_traI	I_traK	I_traL	I_traM	I_traN	I_traP	I_traQ	I_traR	I_traW	I_traY
NC_007760	Anaeromyxobacter_dehalogenans_2CP-C,_complete_genome._	Proteobacteria;	Deltaproteobacteria	circular	5013479	4346	T4SS	NOMOB	O	T4SS_T4CP_NOMOB_O_74	3273	3285	virb4@ANDE001c01_032840&0.772004&3.4e-85	traU	t4cp1@ANDE001c01_032730&0.990909&2.5e-05	t4cp2@ANDE001c01_032730&0.846847&8.5e-21	t4cp3	MOBC	MOBF	MOBH	MOBPHEN	MOBQ	MOBV	MOBT	MOBB	F_traE	F_traH	F_traK	F_traL@ANDE001c01_032850&0.75&7e-06	F_traN	F_traU	F_traV	F_traW	F_trbC	G_ICEHIN1056_000310	G_ICEHIN1056_000410	G_ICEHIN1056_000440	G_ICEHIN1056_000510	G_ICEHIN1056_000520	I_traI	I_traK	I_traL	I_traM	I_traN	I_traP	I_traQ	I_traR	I_traW	I_traY
NC_011891	Anaeromyxobacter_dehalogenans_2CP-1,_complete_genome._	Proteobacteria;	Deltaproteobacteria	circular	5029329	4473	T4SS	CONJ	T	T4SS_T4CP_MOB_T_75	1103	1135	virb4@ANDE002c01_011290&0.812301&6.6e-209	traU	t4cp1@ANDE002c01_011040&0.981818&8.5e-11	t4cp2@ANDE002c01_011040&0.891892&3.9e-40	t4cp3	MOBC	MOBF@ANDE002c01_011030&0.996591&1.6e-244	MOBH	MOBPHEN	MOBQ	MOBV	MOBT	MOBB	F_traE	F_traH	F_traK	F_traL	F_traN	F_traU	F_traV	F_traW	F_trbC	G_ICEHIN1056_000310	G_ICEHIN1056_000410	G_ICEHIN1056_000440	G_ICEHIN1056_000510	G_ICEHIN1056_000520	I_traI	I_traK	I_traL	I_traM	I_traN	I_traP	I_traQ	I_traR	I_traW	I_traY
NC_004842	Anaplasma_marginale_str._St._Maries,_complete_genome._	Proteobacteria;	Alphaproteobacteria	circular	1197687	949	T4SS	NOMOB	T	T4SS_T4CP_NOMOB_T_78_O_77_79_80	66	956	virb4@ANMA001c01_005790&0.80912&9.2e-199@ANMA001c01_007610&0.817603&2.8e-82	traU	t4cp1@ANMA001c01_009520&0.990909&7.2e-27	t4cp2@ANMA001c01_009520&1&3.7e-53	t4cp3	MOBC	MOBF	MOBH	MOBPHEN	MOBQ	MOBV	MOBT	MOBB	F_traE	F_traH	F_traK	F_traL	F_traN	F_traU	F_traV	F_traW	F_trbC	G_ICEHIN1056_000310	G_ICEHIN1056_000410	G_ICEHIN1056_000440	G_ICEHIN1056_000510	G_ICEHIN1056_000520	I_traI	I_traK	I_traL	I_traM	I_traN	I_traP	I_traQ	I_traR	I_traW	I_traY
NC_012026	Anaplasma_marginale_str._Florida,_complete_genome._	Proteobacteria;	Alphaproteobacteria	circular	1202435	940	T4SS	NOMOB	T	T4SS_T4CP_NOMOB_T_82_O_81_83_84	65	949	virb4@ANMA002c01_005750&0.80912&9.2e-199@ANMA002c01_007560&0.817603&2.8e-82	traU	t4cp1@ANMA002c01_009450&0.990909&7.2e-27	t4cp2@ANMA002c01_009450&1&3.7e-53	t4cp3	MOBC	MOBF	MOBH	MOBPHEN	MOBQ	MOBV	MOBT	MOBB	F_traE	F_traH	F_traK	F_traL	F_traN	F_traU	F_traV	F_traW	F_trbC	G_ICEHIN1056_000310	G_ICEHIN1056_000410	G_ICEHIN1056_000440	G_ICEHIN1056_000510	G_ICEHIN1056_000520	I_traI	I_traK	I_traL	I_traM	I_traN	I_traP	I_traQ	I_traR	I_traW	I_traY
NC_007797	Anaplasma_phagocytophilum_HZ,_complete_genome._	Proteobacteria;	Alphaproteobacteria	circular	1471282	1264	T4SS	NOMOB	T	T4SS_T4CP_NOMOB_T_86_O_85_87_88	78	1299	virb4@ANPH001c01_010650&0.814422&2.4e-71@ANPH001c01_003520&0.816543&1.5e-201	traU	t4cp1@ANPH001c01_012950&0.990909&7.2e-27	t4cp2@ANPH001c01_012950&1&1.4e-53	t4cp3	MOBC	MOBF	MOBH	MOBPHEN	MOBQ	MOBV	MOBT	MOBB	F_traE	F_traH	F_traK	F_traL	F_traN	F_traU	F_traV	F_traW	F_trbC	G_ICEHIN1056_000310	G_ICEHIN1056_000410	G_ICEHIN1056_000440	G_ICEHIN1056_000510	G_ICEHIN1056_000520	I_traI	I_traK	I_traL	I_traM	I_traN	I_traP	I_traQ	I_traR	I_traW	I_traY
NC_012034	Anaerocellum_thermophilum_DSM_6725,_complete_genome._	Firmicutes;	Firmicutes	circular	2919718	2654	T4SS	NOMOB	O	T4SS_T4CP_NOMOB_O_91	2468	2477	virb4@ANTH001c01_024770&0.527041&7.4e-96	traU	t4cp1@ANTH001c01_024680&0.990909&4.8e-21	t4cp2@ANTH001c01_024680&0.963964&3.3e-46	t4cp3	MOBC	MOBF	MOBH	MOBPHEN	MOBQ	MOBV	MOBT	MOBB	F_traE	F_traH	F_traK	F_traL	F_traN	F_traU	F_traV	F_traW	F_trbC	G_ICEHIN1056_000310	G_ICEHIN1056_000410	G_ICEHIN1056_000440	G_ICEHIN1056_000510	G_ICEHIN1056_000520	I_traI	I_traK	I_traL	I_traM	I_traN	I_traP	I_traQ	I_traR	I_traW	I_traY
NC_007413	Anabaena_variabilis_ATCC_29413,_complete_genome._	Cyanobacteria;	Cyanobacteria	circular	6365727	5043	T4SS	NOMOB	O	T4SS_NOT4CP_NOMOB_O_92	2903	2903	virb4@ANVA001c01_029030&0.7614&1.1e-39	traU	t4cp1	t4cp2	t4cp3	MOBC	MOBF	MOBH	MOBPHEN	MOBQ	MOBV	MOBT	MOBB	F_traE	F_traH	F_traK	F_traL	F_traN	F_traU	F_traV	F_traW	F_trbC	G_ICEHIN1056_000310	G_ICEHIN1056_000410	G_ICEHIN1056_000440	G_ICEHIN1056_000510	G_ICEHIN1056_000520	I_traI	I_traK	I_traL	I_traM	I_traN	I_traP	I_traQ	I_traR	I_traW	I_traY
NC_009850	Arcobacter_butzleri_RM4018,_complete_genome._	Proteobacteria;	Epsilonproteobacteria	circular	2341251	2259	NOT4SS	MOB	O	NOT4SS_T4CP_MOB_O_96	1706	1707	virb4	traU	t4cp1@ARBU001c01_017060&0.963636&3.7e-05	t4cp2@ARBU001c01_017060&0.842342&2.5e-24	t4cp3	MOBC@ARBU001c01_017070&0.853081&1.7e-09	MOBF	MOBH	MOBPHEN	MOBQ	MOBV	MOBT	MOBB	F_traE	F_traH	F_traK	F_traL	F_traN	F_traU	F_traV	F_traW	F_trbC	G_ICEHIN1056_000310	G_ICEHIN1056_000410	G_ICEHIN1056_000440	G_ICEHIN1056_000510	G_ICEHIN1056_000520	I_traI	I_traK	I_traL	I_traM	I_traN	I_traP	I_traQ	I_traR	I_traW	I_traY
NC_014218	Arcanobacterium_haemolyticum_DSM_20595_chromosome,_complete_genome._	Actinobacteria;	Actinobacteria	circular	1986154	1731	T4SS	CONJ	O	T4SS_T4CP_MOB_O_98	1656	1665	virb4@ARHA001c01_016650&0.805938&7.3e-92	traU	t4cp1@ARHA001c01_016610&0.981818&8.9e-20	t4cp2@ARHA001c01_016610&0.932432&1.2e-43	t4cp3	MOBC	MOBF	MOBH	MOBPHEN@ARHA001c01_016560&0.875536&5.5e-23	MOBQ	MOBV	MOBT	MOBB	F_traE	F_traH	F_traK	F_traL	F_traN	F_traU	F_traV	F_traW	F_trbC	G_ICEHIN1056_000310	G_ICEHIN1056_000410	G_ICEHIN1056_000440	G_ICEHIN1056_000510	G_ICEHIN1056_000520	I_traI	I_traK	I_traL	I_traM	I_traN	I_traP	I_traQ	I_traR	I_traW	I_traY
NC_013854	Azospirillum_sp._B510,_complete_genome._	Proteobacteria;	Alphaproteobacteria	circular	3311395	2893	NOT4SS	MOB	O	NOT4SS_NOT4CP_MOB_O_101	54	54	virb4	traU	t4cp1	t4cp2	t4cp3	MOBC	MOBF	MOBH	MOBPHEN@AZB5001c01_000540&0.909871&3.2e-21	MOBQ	MOBV	MOBT	MOBB	F_traE	F_traH	F_traK	F_traL	F_traN	F_traU	F_traV	F_traW	F_trbC	G_ICEHIN1056_000310	G_ICEHIN1056_000410	G_ICEHIN1056_000440	G_ICEHIN1056_000510	G_ICEHIN1056_000520	I_traI	I_traK	I_traL	I_traM	I_traN	I_traP	I_traQ	I_traR	I_traW	I_traY
NC_013854	Azospirillum_sp._B510,_complete_genome._	Proteobacteria;	Alphaproteobacteria	circular	3311395	2893	T4SS	NOMOB	O	T4SS_T4CP_NOMOB_O_102	1173	1180	virb4@AZB5001c01_011760&0.819724&6.7e-103	traU	t4cp1@AZB5001c01_011730&0.981818&1.3e-11	t4cp2@AZB5001c01_011730&0.986486&1.4e-29	t4cp3	MOBC	MOBF	MOBH	MOBPHEN	MOBQ	MOBV	MOBT	MOBB	F_traE	F_traH	F_traK	F_traL	F_traN	F_traU	F_traV	F_traW	F_trbC	G_ICEHIN1056_000310	G_ICEHIN1056_000410	G_ICEHIN1056_000440	G_ICEHIN1056_000510	G_ICEHIN1056_000520	I_traI	I_traK	I_traL	I_traM	I_traN	I_traP	I_traQ	I_traR	I_traW	I_traY
NC_013854	Azospirillum_sp._B510,_complete_genome._	Proteobacteria;	Alphaproteobacteria	circular	3311395	2893	NOT4SS	MOB	O	NOT4SS_NOT4CP_MOB_O_103	1410	1410	virb4	traU	t4cp1	t4cp2	t4cp3	MOBC	MOBF	MOBH	MOBPHEN	MOBQ@AZB5001c01_014100&0.986175&1.6e-63	MOBV	MOBT	MOBB	F_traE	F_traH	F_traK	F_traL	F_traN	F_traU	F_traV	F_traW	F_trbC	G_ICEHIN1056_000310	G_ICEHIN1056_000410	G_ICEHIN1056_000440	G_ICEHIN1056_000510	G_ICEHIN1056_000520	I_traI	I_traK	I_traL	I_traM	I_traN	I_traP	I_traQ	I_traR	I_traW	I_traY
NC_009937	Azorhizobium_caulinodans_ORS_571,_complete_genome._	Proteobacteria;	Alphaproteobacteria	circular	5369772	4717	T4SS	CONJ	T	T4SS_T4CP_MOB_T_105	3872	3911	virb4@AZCA001c01_039060&0.820785&1.7e-174	traU	t4cp1@AZCA001c01_038720&1&2.5e-26	t4cp2@AZCA001c01_038720&1&1.5e-55	t4cp3	MOBC	MOBF	MOBH	MOBPHEN@AZCA001c01_038730&0.875536&1.6e-31	MOBQ	MOBV	MOBT	MOBB	F_traE	F_traH	F_traK	F_traL	F_traN	F_traU	F_traV	F_traW	F_trbC	G_ICEHIN1056_000310	G_ICEHIN1056_000410	G_ICEHIN1056_000440	G_ICEHIN1056_000510	G_ICEHIN1056_000520	I_traI	I_traK	I_traL	I_traM	I_traN	I_traP	I_traQ	I_traR	I_traW	I_traY
NC_006513	Azoarcus_sp._EbN1,_complete_genome._	Proteobacteria;	Betaproteobacteria	circular	4296230	4133	T4SS	CONJ	G	T4SS_T4CP_MOB_G_107	208	231	virb4@AZSP001c01_002240&0.821845&5.4e-76	traU	t4cp1@AZSP001c01_002150&0.963636&2.2e-11	t4cp2@AZSP001c01_002150&0.968468&4.3e-30	t4cp3	MOBC	MOBF	MOBH@AZSP001c01_002080&0.926471&7.2e-36	MOBPHEN	MOBQ	MOBV	MOBT	MOBB	F_traE	F_traH	F_traK	F_traL	F_traN	F_traU	F_traV	F_traW	F_trbC	G_ICEHIN1056_000310@AZSP001c01_002110&0.574257&2.6e-29	G_ICEHIN1056_000410@AZSP001c01_002200&0.959276&5.8e-92	G_ICEHIN1056_000440@AZSP001c01_002230&0.942029&1.4e-40	G_ICEHIN1056_000510@AZSP001c01_002260&0.929978&1.4e-122	G_ICEHIN1056_000520@AZSP001c01_002310&0.990937&5.3e-110	I_traI	I_traK	I_traL	I_traM	I_traN	I_traP@AZSP001c01_002120&0.569038&7.6e-05	I_traQ	I_traR	I_traW	I_traY
NC_006513	Azoarcus_sp._EbN1,_complete_genome._	Proteobacteria;	Betaproteobacteria	circular	4296230	4133	T4SS	CONJ	G	T4SS_T4CP_MOB_G_109	1357	1449	virb4@AZSP001c01_013700&0.827147&3.9e-94	traU	t4cp1@AZSP001c01_013850&0.990909&8.5e-11	t4cp2@AZSP001c01_014490&0.545045&1.7e-18@AZSP001c01_013850&0.981982&1.9e-29	t4cp3	MOBC	MOBF	MOBH@AZSP001c01_014320&0.936275&1.3e-40@AZSP001c01_013570&0.941176&4.5e-42	MOBPHEN	MOBQ	MOBV	MOBT	MOBB	F_traE	F_traH	F_traK	F_traL	F_traN	F_traU	F_traV	F_traW	F_trbC	G_ICEHIN1056_000310@AZSP001c01_013900&0.910891&6.4e-61	G_ICEHIN1056_000410@AZSP001c01_013740&0.963801&1e-104	G_ICEHIN1056_000440@AZSP001c01_013710&1&3.5e-62	G_ICEHIN1056_000510@AZSP001c01_014420&0.986871&1.4e-197@AZSP001c01_013650&0.982495&5.1e-194	G_ICEHIN1056_000520@AZSP001c01_014430&0.978852&5.2e-149@AZSP001c01_013660&0.981873&1.3e-146	I_traI	I_traK	I_traL	I_traM	I_traN	I_traP	I_traQ	I_traR	I_traW	I_traY
NC_006513	Azoarcus_sp._EbN1,_complete_genome._	Proteobacteria;	Betaproteobacteria	circular	4296230	4133	T4SS	NOMOB	F	T4SS_NOT4CP_NOMOB_F_110	3845	3860	virb4@AZSP001c01_038500&0.80912&3.2e-113	traU	t4cp1	t4cp2	t4cp3	MOBC	MOBF	MOBH	MOBPHEN	MOBQ	MOBV	MOBT	MOBB	F_traE@AZSP001c01_038450&0.948187&6.8e-38	F_traH@AZSP001c01_038600&0.94577&2.5e-85	F_traK@AZSP001c01_038460&0.845324&8.2e-27	F_traL	F_traN@AZSP001c01_038570&0.926718&5.5e-81	F_traU@AZSP001c01_038550&0.952096&4.2e-126	F_traV@AZSP001c01_038490&0.759184&3.3e-36	F_traW@AZSP001c01_038540&0.919811&1.8e-62	F_trbC@AZSP001c01_038560&0.820961&1.4e-44	G_ICEHIN1056_000310	G_ICEHIN1056_000410	G_ICEHIN1056_000440	G_ICEHIN1056_000510	G_ICEHIN1056_000520	I_traI	I_traK	I_traL	I_traM	I_traN	I_traP	I_traQ	I_traR	I_traW	I_traY
NC_012560	Azotobacter_vinelandii_DJ,_complete_genome._	Proteobacteria;	Gammaproteobacteria	circular	5365318	5051	T4SS	CONJ	T	T4SS_T4CP_MOB_T_112B	3504	3533	virb4@AZVI001c01_035090&0.827147&1.2e-177	traU	t4cp1@AZVI001c01_035140&1&9e-25	t4cp2@AZVI001c01_035140&1&1.1e-55	t4cp3	MOBC	MOBF	MOBH	MOBPHEN@AZVI001c01_035330&0.725322&3.8e-22	MOBQ	MOBV	MOBT	MOBB	F_traE	F_traH	F_traK	F_traL	F_traN	F_traU	F_traV	F_traW	F_trbC	G_ICEHIN1056_000310	G_ICEHIN1056_000410	G_ICEHIN1056_000440	G_ICEHIN1056_000510	G_ICEHIN1056_000520	I_traI	I_traK	I_traL	I_traM	I_traN	I_traP	I_traQ	I_traR	I_traW	I_traY
NC_012560	Azotobacter_vinelandii_DJ,_complete_genome._	Proteobacteria;	Gammaproteobacteria	circular	5365318	5051	T4SS	MOB	G	T4SS_NOT4CP_MOB_G_112A	3564	3598	virb4@AZVI001c01_035680&0.799576&4.9e-88	traU	t4cp1	t4cp2	t4cp3	MOBC	MOBF	MOBH@AZVI001c01_035980&0.897059&3.7e-42	MOBPHEN	MOBQ	MOBV	MOBT	MOBB	F_traE	F_traH	F_traK	F_traL	F_traN	F_traU	F_traV	F_traW	F_trbC	G_ICEHIN1056_000310	G_ICEHIN1056_000410@AZVI001c01_035640&0.927602&6.6e-95	G_ICEHIN1056_000440@AZVI001c01_035670&0.934783&1.7e-57	G_ICEHIN1056_000510@AZVI001c01_035760&0.962801&8e-163	G_ICEHIN1056_000520@AZVI001c01_035750&0.936556&3.7e-132	I_traI	I_traK	I_traL	I_traM	I_traN	I_traP	I_traQ	I_traR	I_traW	I_traY
NC_003997	Bacillus_anthracis_str._Ames,_complete_genome._	Firmicutes;	Firmicutes	circular	5227293	5311	NOT4SS	MOB	O	NOT4SS_NOT4CP_MOB_O_115	4927	4927	virb4	traU	t4cp1	t4cp2	t4cp3	MOBC@BAAN001c01_049270&0.540284&0.0013	MOBF	MOBH	MOBPHEN	MOBQ	MOBV	MOBT	MOBB	F_traE	F_traH	F_traK	F_traL	F_traN	F_traU	F_traV	F_traW	F_trbC	G_ICEHIN1056_000310	G_ICEHIN1056_000410	G_ICEHIN1056_000440	G_ICEHIN1056_000510	G_ICEHIN1056_000520	I_traI	I_traK	I_traL	I_traM	I_traN	I_traP	I_traQ	I_traR	I_traW	I_traY
NC_007530	Bacillus_anthracis_str._'Ames_Ancestor',_complete_genome._	Firmicutes;	Firmicutes	circular	5227419	5309	NOT4SS	MOB	O	NOT4SS_NOT4CP_MOB_O_118	4925	4925	virb4	traU	t4cp1	t4cp2	t4cp3	MOBC@BAAN002c01_049250&0.540284&0.0013	MOBF	MOBH	MOBPHEN	MOBQ	MOBV	MOBT	MOBB	F_traE	F_traH	F_traK	F_traL	F_traN	F_traU	F_traV	F_traW	F_trbC	G_ICEHIN1056_000310	G_ICEHIN1056_000410	G_ICEHIN1056_000440	G_ICEHIN1056_000510	G_ICEHIN1056_000520	I_traI	I_traK	I_traL	I_traM	I_traN	I_traP	I_traQ	I_traR	I_traW	I_traY
NC_012659	Bacillus_anthracis_str._A0248,_complete_genome._	Firmicutes;	Firmicutes	circular	5227419	5040	NOT4SS	MOB	O	NOT4SS_NOT4CP_MOB_O_121	4667	4667	virb4	traU	t4cp1	t4cp2	t4cp3	MOBC@BAAN003c01_046670&0.540284&0.0013	MOBF	MOBH	MOBPHEN	MOBQ	MOBV	MOBT	MOBB	F_traE	F_traH	F_traK	F_traL	F_traN	F_traU	F_traV	F_traW	F_trbC	G_ICEHIN1056_000310	G_ICEHIN1056_000410	G_ICEHIN1056_000440	G_ICEHIN1056_000510	G_ICEHIN1056_000520	I_traI	I_traK	I_traL	I_traM	I_traN	I_traP	I_traQ	I_traR	I_traW	I_traY
NC_005945	Bacillus_anthracis_str._Sterne,_complete_genome._	Firmicutes;	Firmicutes	circular	5228663	5287	NOT4SS	MOB	O	NOT4SS_NOT4CP_MOB_O_124	4903	4903	virb4	traU	t4cp1	t4cp2	t4cp3	MOBC@BAAN004c01_049030&0.540284&0.0013	MOBF	MOBH	MOBPHEN	MOBQ	MOBV	MOBT	MOBB	F_traE	F_traH	F_traK	F_traL	F_traN	F_traU	F_traV	F_traW	F_trbC	G_ICEHIN1056_000310	G_ICEHIN1056_000410	G_ICEHIN1056_000440	G_ICEHIN1056_000510	G_ICEHIN1056_000520	I_traI	I_traK	I_traL	I_traM	I_traN	I_traP	I_traQ	I_traR	I_traW	I_traY
NC_012581	Bacillus_anthracis_str._CDC_684,_complete_genome._	Firmicutes;	Firmicutes	circular	5230115	5579	NOT4SS	MOB	O	NOT4SS_NOT4CP_MOB_O_127	5176	5176	virb4	traU	t4cp1	t4cp2	t4cp3	MOBC@BAAN005c01_051760&0.540284&0.0013	MOBF	MOBH	MOBPHEN	MOBQ	MOBV	MOBT	MOBB	F_traE	F_traH	F_traK	F_traL	F_traN	F_traU	F_traV	F_traW	F_trbC	G_ICEHIN1056_000310	G_ICEHIN1056_000410	G_ICEHIN1056_000440	G_ICEHIN1056_000510	G_ICEHIN1056_000520	I_traI	I_traK	I_traL	I_traM	I_traN	I_traP	I_traQ	I_traR	I_traW	I_traY
NC_011773	Bacillus_cereus_AH820,_complete_genome._	Firmicutes;	Firmicutes	linear	5302683	5474	NOT4SS	MOB	O	NOT4SS_NOT4CP_MOB_O_134	5072	5072	virb4	traU	t4cp1	t4cp2	t4cp3	MOBC@BACE005c01_050720&0.540284&0.0013	MOBF	MOBH	MOBPHEN	MOBQ	MOBV	MOBT	MOBB	F_traE	F_traH	F_traK	F_traL	F_traN	F_traU	F_traV	F_traW	F_trbC	G_ICEHIN1056_000310	G_ICEHIN1056_000410	G_ICEHIN1056_000440	G_ICEHIN1056_000510	G_ICEHIN1056_000520	I_traI	I_traK	I_traL	I_traM	I_traN	I_traP	I_traQ	I_traR	I_traW	I_traY
NC_004722	Bacillus_cereus_ATCC_14579,_complete_genome._	Firmicutes;	Firmicutes	circular	5411809	5234	NOT4SS	MOB	O	NOT4SS_NOT4CP_MOB_O_136	1894	1894	virb4	traU	t4cp1	t4cp2	t4cp3	MOBC@BACE006c01_018940&0.85782&0.00011	MOBF	MOBH	MOBPHEN	MOBQ	MOBV	MOBT	MOBB	F_traE	F_traH	F_traK	F_traL	F_traN	F_traU	F_traV	F_traW	F_trbC	G_ICEHIN1056_000310	G_ICEHIN1056_000410	G_ICEHIN1056_000440	G_ICEHIN1056_000510	G_ICEHIN1056_000520	I_traI	I_traK	I_traL	I_traM	I_traN	I_traP	I_traQ	I_traR	I_traW	I_traY
NC_011772	Bacillus_cereus_G9842,_complete_genome._	Firmicutes;	Firmicutes	linear	5387334	5488	NOT4SS	MOB	O	NOT4SS_NOT4CP_MOB_O_140	2850	2850	virb4	traU	t4cp1	t4cp2	t4cp3	MOBC@BACE007c01_028500&0.872038&0.00016	MOBF	MOBH	MOBPHEN	MOBQ	MOBV	MOBT	MOBB	F_traE	F_traH	F_traK	F_traL	F_traN	F_traU	F_traV	F_traW	F_trbC	G_ICEHIN1056_000310	G_ICEHIN1056_000410	G_ICEHIN1056_000440	G_ICEHIN1056_000510	G_ICEHIN1056_000520	I_traI	I_traK	I_traL	I_traM	I_traN	I_traP	I_traQ	I_traR	I_traW	I_traY
NC_009674	Bacillus_cereus_subsp._cytotoxis_NVH_391-98,_complete_genome._	Firmicutes;	Firmicutes	circular	4087024	3833	NOT4SS	MOB	O	NOT4SS_NOT4CP_MOB_O_142	2277	2277	virb4	traU	t4cp1	t4cp2	t4cp3	MOBC	MOBF	MOBH	MOBPHEN	MOBQ	MOBV@BACE008c01_022770&0.72549&2.7e-29	MOBT	MOBB	F_traE	F_traH	F_traK	F_traL	F_traN	F_traU	F_traV	F_traW	F_trbC	G_ICEHIN1056_000310	G_ICEHIN1056_000410	G_ICEHIN1056_000440	G_ICEHIN1056_000510	G_ICEHIN1056_000520	I_traI	I_traK	I_traL	I_traM	I_traN	I_traP	I_traQ	I_traR	I_traW	I_traY
NC_009674	Bacillus_cereus_subsp._cytotoxis_NVH_391-98,_complete_genome._	Firmicutes;	Firmicutes	circular	4087024	3833	NOT4SS	MOB	O	NOT4SS_NOT4CP_MOB_O_143	2545	2545	virb4	traU	t4cp1	t4cp2	t4cp3	MOBC@BACE008c01_025450&0.744076&5.6e-06	MOBF	MOBH	MOBPHEN	MOBQ	MOBV	MOBT	MOBB	F_traE	F_traH	F_traK	F_traL	F_traN	F_traU	F_traV	F_traW	F_trbC	G_ICEHIN1056_000310	G_ICEHIN1056_000410	G_ICEHIN1056_000440	G_ICEHIN1056_000510	G_ICEHIN1056_000520	I_traI	I_traK	I_traL	I_traM	I_traN	I_traP	I_traQ	I_traR	I_traW	I_traY
NC_006347	Bacteroides_fragilis_YCH46,_complete_genome._	Bacteroidetes;	Bacteroidetes	circular	5277274	4578	T4SS	CONJ	O	T4SS_T4CP_MOB_O_147	124	134	virb4@BAFR001c01_001240&0.766702&2.5e-89	traU	t4cp1@BAFR001c01_001340&0.990909&2.1e-07	t4cp2@BAFR001c01_001340&0.936937&7.5e-22	t4cp3	MOBC	MOBF	MOBH	MOBPHEN@BAFR001c01_001330&0.824034&2.3e-25	MOBQ	MOBV	MOBT	MOBB	F_traE	F_traH	F_traK	F_traL	F_traN	F_traU	F_traV	F_traW	F_trbC	G_ICEHIN1056_000310	G_ICEHIN1056_000410	G_ICEHIN1056_000440	G_ICEHIN1056_000510	G_ICEHIN1056_000520	I_traI	I_traK	I_traL	I_traM	I_traN	I_traP	I_traQ	I_traR	I_traW	I_traY
NC_006347	Bacteroides_fragilis_YCH46,_complete_genome._	Bacteroidetes;	Bacteroidetes	circular	5277274	4578	NOT4SS	MOB	O	NOT4SS_NOT4CP_MOB_O_148	651	651	virb4	traU	t4cp1	t4cp2	t4cp3	MOBC	MOBF	MOBH	MOBPHEN	MOBQ	MOBV	MOBT	MOBB@BAFR001c01_006510&1&4.6e-82	F_traE	F_traH	F_traK	F_traL	F_traN	F_traU	F_traV	F_traW	F_trbC	G_ICEHIN1056_000310	G_ICEHIN1056_000410	G_ICEHIN1056_000440	G_ICEHIN1056_000510	G_ICEHIN1056_000520	I_traI	I_traK	I_traL	I_traM	I_traN	I_traP	I_traQ	I_traR	I_traW	I_traY
NC_006347	Bacteroides_fragilis_YCH46,_complete_genome._	Bacteroidetes;	Bacteroidetes	circular	5277274	4578	NOT4SS	MOB	O	NOT4SS_NOT4CP_MOB_O_149	1176	1176	virb4	traU	t4cp1	t4cp2	t4cp3	MOBC	MOBF	MOBH	MOBPHEN@BAFR001c01_011760&0.922747&3.8e-10	MOBQ	MOBV	MOBT	MOBB	F_traE	F_traH	F_traK	F_traL	F_traN	F_traU	F_traV	F_traW	F_trbC	G_ICEHIN1056_000310	G_ICEHIN1056_000410	G_ICEHIN1056_000440	G_ICEHIN1056_000510	G_ICEHIN1056_000520	I_traI	I_traK	I_traL	I_traM	I_traN	I_traP	I_traQ	I_traR	I_traW	I_traY
NC_006347	Bacteroides_fragilis_YCH46,_complete_genome._	Bacteroidetes;	Bacteroidetes	circular	5277274	4578	NOT4SS	MOB	O	NOT4SS_NOT4CP_MOB_O_150	1250	1294	virb4	traU	t4cp1	t4cp2	t4cp3	MOBC	MOBF	MOBH	MOBPHEN	MOBQ	MOBV@BAFR001c01_012940&0.980392&4.2e-39@BAFR001c01_012500&0.970588&7.8e-39	MOBT	MOBB	F_traE	F_traH	F_traK	F_traL	F_traN	F_traU	F_traV	F_traW	F_trbC	G_ICEHIN1056_000310	G_ICEHIN1056_000410	G_ICEHIN1056_000440	G_ICEHIN1056_000510	G_ICEHIN1056_000520	I_traI	I_traK	I_traL	I_traM	I_traN	I_traP	I_traQ	I_traR	I_traW	I_traY
NC_006347	Bacteroides_fragilis_YCH46,_complete_genome._	Bacteroidetes;	Bacteroidetes	circular	5277274	4578	T4SS	CONJ	O	T4SS_T4CP_MOB_O_151	1373	1398	virb4@BAFR001c01_013730&0.768823&2.6e-86	traU	t4cp1@BAFR001c01_013980&0.909091&0.00024@BAFR001c01_013860&0.981818&6.4e-08	t4cp2@BAFR001c01_013860&0.932432&4.4e-22	t4cp3	MOBC	MOBF	MOBH	MOBPHEN@BAFR001c01_013850&0.854077&2.4e-25&0.0049	MOBQ	MOBV	MOBT	MOBB	F_traE	F_traH	F_traK	F_traL	F_traN	F_traU	F_traV	F_traW	F_trbC	G_ICEHIN1056_000310	G_ICEHIN1056_000410	G_ICEHIN1056_000440	G_ICEHIN1056_000510	G_ICEHIN1056_000520	I_traI	I_traK	I_traL	I_traM	I_traN	I_traP	I_traQ	I_traR	I_traW	I_traY
NC_006347	Bacteroides_fragilis_YCH46,_complete_genome._	Bacteroidetes;	Bacteroidetes	circular	5277274	4578	T4SS	CONJ	O	T4SS_T4CP_MOB_O_152_O_153	2841	2943	virb4@BAFR001c01_028410&0.805938&8.2e-102	traU	t4cp1@BAFR001c01_028590&0.972727&3.5e-10	t4cp2@BAFR001c01_028590&0.869369&1.9e-20	t4cp3	MOBC	MOBF	MOBH	MOBPHEN	MOBQ	MOBV@BAFR001c01_029430&0.906863&2.4e-22	MOBT	MOBB	F_traE	F_traH	F_traK	F_traL	F_traN	F_traU	F_traV	F_traW	F_trbC	G_ICEHIN1056_000310	G_ICEHIN1056_000410	G_ICEHIN1056_000440	G_ICEHIN1056_000510	G_ICEHIN1056_000520	I_traI	I_traK	I_traL	I_traM	I_traN	I_traP	I_traQ	I_traR	I_traW	I_traY
NC_006347	Bacteroides_fragilis_YCH46,_complete_genome._	Bacteroidetes;	Bacteroidetes	circular	5277274	4578	NOT4SS	MOB	O	NOT4SS_NOT4CP_MOB_O_154	4343	4343	virb4	traU	t4cp1	t4cp2	t4cp3	MOBC	MOBF	MOBH	MOBPHEN	MOBQ	MOBV@BAFR001c01_043430&0.838235&4.2e-19	MOBT	MOBB	F_traE	F_traH	F_traK	F_traL	F_traN	F_traU	F_traV	F_traW	F_trbC	G_ICEHIN1056_000310	G_ICEHIN1056_000410	G_ICEHIN1056_000440	G_ICEHIN1056_000510	G_ICEHIN1056_000520	I_traI	I_traK	I_traL	I_traM	I_traN	I_traP	I_traQ	I_traR	I_traW	I_traY
NC_003228	Bacteroides_fragilis_NCTC_9343,_complete_genome._	Bacteroidetes;	Bacteroidetes	circular	5205140	4184	NOT4SS	MOB	O	NOT4SS_NOT4CP_MOB_O_155	1072	1072	virb4	traU	t4cp1	t4cp2	t4cp3	MOBC	MOBF	MOBH	MOBPHEN@BAFR002c01_010720&0.944206&1.2e-11	MOBQ	MOBV	MOBT	MOBB	F_traE	F_traH	F_traK	F_traL	F_traN	F_traU	F_traV	F_traW	F_trbC	G_ICEHIN1056_000310	G_ICEHIN1056_000410	G_ICEHIN1056_000440	G_ICEHIN1056_000510	G_ICEHIN1056_000520	I_traI	I_traK	I_traL	I_traM	I_traN	I_traP	I_traQ	I_traR	I_traW	I_traY
NC_003228	Bacteroides_fragilis_NCTC_9343,_complete_genome._	Bacteroidetes;	Bacteroidetes	circular	5205140	4184	T4SS	CONJ	O	T4SS_T4CP_MOB_O_156	1178	1187	virb4@BAFR002c01_011780&0.732768&9.6e-84	traU	t4cp1@BAFR002c01_011870&0.981818&8.1e-07	t4cp2@BAFR002c01_011870&0.936937&3.1e-22	t4cp3	MOBC	MOBF	MOBH	MOBPHEN@BAFR002c01_011860&0.866953&3.6e-24	MOBQ	MOBV	MOBT	MOBB	F_traE	F_traH	F_traK	F_traL	F_traN	F_traU	F_traV	F_traW	F_trbC	G_ICEHIN1056_000310	G_ICEHIN1056_000410	G_ICEHIN1056_000440	G_ICEHIN1056_000510	G_ICEHIN1056_000520	I_traI	I_traK	I_traL	I_traM	I_traN	I_traP	I_traQ	I_traR	I_traW	I_traY
NC_003228	Bacteroides_fragilis_NCTC_9343,_complete_genome._	Bacteroidetes;	Bacteroidetes	circular	5205140	4184	T4SS	CONJ	O	T4SS_T4CP_MOB_O_157	1408	1440	virb4@BAFR002c01_014080&0.763521&5.5e-52	traU	t4cp1@BAFR002c01_014390&0.954545&1.7e-07	t4cp2@BAFR002c01_014390&0.914414&2.4e-26	t4cp3	MOBC	MOBF	MOBH	MOBPHEN	MOBQ	MOBV	MOBT	MOBB@BAFR002c01_014400&0.964286&1.6e-87	F_traE	F_traH	F_traK	F_traL	F_traN	F_traU	F_traV	F_traW	F_trbC	G_ICEHIN1056_000310	G_ICEHIN1056_000410	G_ICEHIN1056_000440	G_ICEHIN1056_000510	G_ICEHIN1056_000520	I_traI	I_traK	I_traL	I_traM	I_traN	I_traP	I_traQ	I_traR	I_traW	I_traY
NC_003228	Bacteroides_fragilis_NCTC_9343,_complete_genome._	Bacteroidetes;	Bacteroidetes	circular	5205140	4184	T4SS	CONJ	O	T4SS_T4CP_MOB_O_158	1669	1678	virb4@BAFR002c01_016780&0.735949&4.5e-89	traU	t4cp1@BAFR002c01_016690&0.990909&3.8e-08	t4cp2@BAFR002c01_016690&0.936937&2.7e-22	t4cp3	MOBC	MOBF	MOBH	MOBPHEN@BAFR002c01_016700&0.686695&3.3e-22	MOBQ	MOBV	MOBT	MOBB	F_traE	F_traH	F_traK	F_traL	F_traN	F_traU	F_traV	F_traW	F_trbC	G_ICEHIN1056_000310	G_ICEHIN1056_000410	G_ICEHIN1056_000440	G_ICEHIN1056_000510	G_ICEHIN1056_000520	I_traI	I_traK	I_traL	I_traM	I_traN	I_traP	I_traQ	I_traR	I_traW	I_traY
NC_003228	Bacteroides_fragilis_NCTC_9343,_complete_genome._	Bacteroidetes;	Bacteroidetes	circular	5205140	4184	NOT4SS	MOB	O	NOT4SS_NOT4CP_MOB_O_159	3205	3205	virb4	traU	t4cp1	t4cp2	t4cp3	MOBC	MOBF	MOBH	MOBPHEN@BAFR002c01_032050&0.961373&2.3e-32	MOBQ	MOBV	MOBT	MOBB	F_traE	F_traH	F_traK	F_traL	F_traN	F_traU	F_traV	F_traW	F_trbC	G_ICEHIN1056_000310	G_ICEHIN1056_000410	G_ICEHIN1056_000440	G_ICEHIN1056_000510	G_ICEHIN1056_000520	I_traI	I_traK	I_traL	I_traM	I_traN	I_traP	I_traQ	I_traR	I_traW	I_traY
NC_003228	Bacteroides_fragilis_NCTC_9343,_complete_genome._	Bacteroidetes;	Bacteroidetes	circular	5205140	4184	NOT4SS	MOB	O	NOT4SS_NOT4CP_MOB_O_160	3979	3979	virb4	traU	t4cp1	t4cp2	t4cp3	MOBC	MOBF	MOBH	MOBPHEN	MOBQ	MOBV@BAFR002c01_039790&0.838235&4.8e-19	MOBT	MOBB	F_traE	F_traH	F_traK	F_traL	F_traN	F_traU	F_traV	F_traW	F_trbC	G_ICEHIN1056_000310	G_ICEHIN1056_000410	G_ICEHIN1056_000440	G_ICEHIN1056_000510	G_ICEHIN1056_000520	I_traI	I_traK	I_traL	I_traM	I_traN	I_traP	I_traQ	I_traR	I_traW	I_traY
NC_012846	Bartonella_grahamii_as4aup,_complete_genome._	Proteobacteria;	Alphaproteobacteria	circular	2341328	1737	T4SS	NOMOB	T	T4SS_T4CP_NOMOB_T_161	1319	1330	virb4@BAGR001c01_013200&0.812301&2.9e-227	traU	t4cp1@BAGR001c01_013300&0.990909&2e-18	t4cp2@BAGR001c01_013300&1&1.4e-48	t4cp3	MOBC	MOBF	MOBH	MOBPHEN	MOBQ	MOBV	MOBT	MOBB	F_traE	F_traH	F_traK	F_traL	F_traN	F_traU	F_traV	F_traW	F_trbC	G_ICEHIN1056_000310	G_ICEHIN1056_000410	G_ICEHIN1056_000440	G_ICEHIN1056_000510	G_ICEHIN1056_000520	I_traI	I_traK	I_traL	I_traM	I_traN	I_traP	I_traQ	I_traR	I_traW	I_traY
NC_012846	Bartonella_grahamii_as4aup,_complete_genome._	Proteobacteria;	Alphaproteobacteria	circular	2341328	1737	T4SS	NOMOB	T	T4SS_T4CP_NOMOB_T_162	1520	1587	virb4@BAGR001c01_015780&0.814422&5.6e-230	traU	t4cp1@BAGR001c01_015200&0.990909&3.6e-19	t4cp2@BAGR001c01_015200&1&3.1e-42	t4cp3	MOBC	MOBF	MOBH	MOBPHEN	MOBQ	MOBV	MOBT	MOBB	F_traE	F_traH	F_traK	F_traL	F_traN	F_traU	F_traV	F_traW	F_trbC	G_ICEHIN1056_000310	G_ICEHIN1056_000410	G_ICEHIN1056_000440	G_ICEHIN1056_000510	G_ICEHIN1056_000520	I_traI	I_traK	I_traL	I_traM	I_traN	I_traP	I_traQ	I_traR	I_traW	I_traY
NC_012846	Bartonella_grahamii_as4aup,_complete_genome._	Proteobacteria;	Alphaproteobacteria	circular	2341328	1737	T4SS	NOMOB	T	T4SS_NOT4CP_NOMOB_T_163	1679	1694	virb4@BAGR001c01_016800&0.822906&3.6e-234	traU	t4cp1	t4cp2	t4cp3	MOBC	MOBF	MOBH	MOBPHEN	MOBQ	MOBV	MOBT	MOBB	F_traE	F_traH	F_traK	F_traL	F_traN	F_traU	F_traV	F_traW	F_trbC	G_ICEHIN1056_000310	G_ICEHIN1056_000410	G_ICEHIN1056_000440	G_ICEHIN1056_000510	G_ICEHIN1056_000520	I_traI	I_traK	I_traL	I_traM	I_traN	I_traP	I_traQ	I_traR	I_traW	I_traY
NC_005956	Bartonella_henselae_str._Houston-1,_complete_genome._	Proteobacteria;	Alphaproteobacteria	circular	1931047	1488	T4SS	NOMOB	T	T4SS_T4CP_NOMOB_T_166	1219	1230	virb4@BAHE001c01_012200&0.814422&7.4e-228	traU	t4cp1@BAHE001c01_012300&0.990909&2.4e-18	t4cp2@BAHE001c01_012300&1&3.2e-49	t4cp3	MOBC	MOBF	MOBH	MOBPHEN	MOBQ	MOBV	MOBT	MOBB	F_traE	F_traH	F_traK	F_traL	F_traN	F_traU	F_traV	F_traW	F_trbC	G_ICEHIN1056_000310	G_ICEHIN1056_000410	G_ICEHIN1056_000440	G_ICEHIN1056_000510	G_ICEHIN1056_000520	I_traI	I_traK	I_traL	I_traM	I_traN	I_traP	I_traQ	I_traR	I_traW	I_traY
NC_005956	Bartonella_henselae_str._Houston-1,_complete_genome._	Proteobacteria;	Alphaproteobacteria	circular	1931047	1488	T4SS	NOMOB	T	T4SS_NOT4CP_NOMOB_T_167	1438	1447	virb4@BAHE001c01_014390&0.820785&2.9e-231	traU	t4cp1	t4cp2	t4cp3	MOBC	MOBF	MOBH	MOBPHEN	MOBQ	MOBV	MOBT	MOBB	F_traE	F_traH	F_traK	F_traL	F_traN	F_traU	F_traV	F_traW	F_trbC	G_ICEHIN1056_000310	G_ICEHIN1056_000410	G_ICEHIN1056_000440	G_ICEHIN1056_000510	G_ICEHIN1056_000520	I_traI	I_traK	I_traL	I_traM	I_traN	I_traP	I_traQ	I_traR	I_traW	I_traY
NC_013791	Bacillus_pseudofirmus_OF4_chromosome,_complete_genome._	Firmicutes;	Firmicutes	circular	3858997	3921	NOT4SS	MOB	O	NOT4SS_NOT4CP_MOB_O_173	999	999	virb4	traU	t4cp1	t4cp2	t4cp3	MOBC@BAPS001c01_009990&0.64455&0.002	MOBF	MOBH	MOBPHEN	MOBQ	MOBV	MOBT	MOBB	F_traE	F_traH	F_traK	F_traL	F_traN	F_traU	F_traV	F_traW	F_trbC	G_ICEHIN1056_000310	G_ICEHIN1056_000410	G_ICEHIN1056_000440	G_ICEHIN1056_000510	G_ICEHIN1056_000520	I_traI	I_traK	I_traL	I_traM	I_traN	I_traP	I_traQ	I_traR	I_traW	I_traY
NC_009848	Bacillus_pumilus_SAFR-032,_complete_genome._	Firmicutes;	FA	circular	3704465	3681	T4SS	CONJ	O	T4SS_T4CP_MOB_O_174	584	604	virb4@BAPU001c01_006040&0.681866&2.9e-31	traU	t4cp1	t4cp2	t4cp3@BAPU001c01_005840&0.952586&7.7e-153	MOBC	MOBF	MOBH	MOBPHEN	MOBQ	MOBV	MOBT@BAPU001c01_005850&0.937158&1.1e-132	MOBB	F_traE	F_traH	F_traK	F_traL	F_traN	F_traU	F_traV	F_traW	F_trbC	G_ICEHIN1056_000310	G_ICEHIN1056_000410	G_ICEHIN1056_000440	G_ICEHIN1056_000510	G_ICEHIN1056_000520	I_traI	I_traK	I_traL	I_traM	I_traN	I_traP	I_traQ	I_traR	I_traW	I_traY
NC_005955	Bartonella_quintana_str._Toulouse,_complete_genome._	Proteobacteria;	Alphaproteobacteria	circular	1581384	1142	T4SS	NOMOB	T	T4SS_T4CP_NOMOB_T_175	930	939	virb4@BAQU001c01_009310&0.813362&2.7e-225	traU	t4cp1@BAQU001c01_009390&0.990909&1.2e-18	t4cp2@BAQU001c01_009390&1&5.6e-50	t4cp3	MOBC	MOBF	MOBH	MOBPHEN	MOBQ	MOBV	MOBT	MOBB	F_traE	F_traH	F_traK	F_traL	F_traN	F_traU	F_traV	F_traW	F_trbC	G_ICEHIN1056_000310	G_ICEHIN1056_000410	G_ICEHIN1056_000440	G_ICEHIN1056_000510	G_ICEHIN1056_000520	I_traI	I_traK	I_traL	I_traM	I_traN	I_traP	I_traQ	I_traR	I_traW	I_traY
NC_005955	Bartonella_quintana_str._Toulouse,_complete_genome._	Proteobacteria;	Alphaproteobacteria	circular	1581384	1142	T4SS	NOMOB	T	T4SS_NOT4CP_NOMOB_T_176	1101	1110	virb4@BAQU001c01_011020&0.819724&3e-234	traU	t4cp1	t4cp2	t4cp3	MOBC	MOBF	MOBH	MOBPHEN	MOBQ	MOBV	MOBT	MOBB	F_traE	F_traH	F_traK	F_traL	F_traN	F_traU	F_traV	F_traW	F_trbC	G_ICEHIN1056_000310	G_ICEHIN1056_000410	G_ICEHIN1056_000440	G_ICEHIN1056_000510	G_ICEHIN1056_000520	I_traI	I_traK	I_traL	I_traM	I_traN	I_traP	I_traQ	I_traR	I_traW	I_traY
NC_000964	Bacillus_subtilis_subsp._subtilis_str._168,_complete_genome._	Firmicutes;	FA	circular	4214630	4105	T4SS	CONJ	O	T4SS_T4CP_MOB_O_177	541	549	virb4@BASU001c01_005490&0.687169&7.4e-32	traU	t4cp1	t4cp2	t4cp3@BASU001c01_005410&0.984914&2.5e-164	MOBC	MOBF	MOBH	MOBPHEN	MOBQ	MOBV	MOBT@BASU001c01_005420&0.904372&1.8e-134	MOBB	F_traE	F_traH	F_traK	F_traL	F_traN	F_traU	F_traV	F_traW	F_trbC	G_ICEHIN1056_000310	G_ICEHIN1056_000410	G_ICEHIN1056_000440	G_ICEHIN1056_000510	G_ICEHIN1056_000520	I_traI	I_traK	I_traL	I_traM	I_traN	I_traP	I_traQ	I_traR	I_traW	I_traY
NC_004663	Bacteroides_thetaiotaomicron_VPI-5482,_complete_genome._	Bacteroidetes;	Bacteroidetes	circular	6260361	4778	T4SS	CONJ	O	T4SS_T4CP_MOB_O_178	93	102	virb4@BATH001c01_000930&0.732768&1.1e-83	traU	t4cp1@BATH001c01_001020&0.981818&1.1e-06	t4cp2@BATH001c01_001020&0.936937&3e-23	t4cp3	MOBC	MOBF	MOBH	MOBPHEN@BATH001c01_001010&1.12446&1.5e-25&0.0099	MOBQ	MOBV	MOBT	MOBB	F_traE	F_traH	F_traK	F_traL	F_traN	F_traU	F_traV	F_traW	F_trbC	G_ICEHIN1056_000310	G_ICEHIN1056_000410	G_ICEHIN1056_000440	G_ICEHIN1056_000510	G_ICEHIN1056_000520	I_traI	I_traK	I_traL	I_traM	I_traN	I_traP	I_traQ	I_traR	I_traW	I_traY
NC_004663	Bacteroides_thetaiotaomicron_VPI-5482,_complete_genome._	Bacteroidetes;	Bacteroidetes	circular	6260361	4778	NOT4SS	MOB	O	NOT4SS_NOT4CP_MOB_O_179	229	229	virb4	traU	t4cp1	t4cp2	t4cp3	MOBC	MOBF	MOBH	MOBPHEN	MOBQ	MOBV@BATH001c01_002290&0.818627&1.8e-13	MOBT	MOBB	F_traE	F_traH	F_traK	F_traL	F_traN	F_traU	F_traV	F_traW	F_trbC	G_ICEHIN1056_000310	G_ICEHIN1056_000410	G_ICEHIN1056_000440	G_ICEHIN1056_000510	G_ICEHIN1056_000520	I_traI	I_traK	I_traL	I_traM	I_traN	I_traP	I_traQ	I_traR	I_traW	I_traY
NC_004663	Bacteroides_thetaiotaomicron_VPI-5482,_complete_genome._	Bacteroidetes;	Bacteroidetes	circular	6260361	4778	NOT4SS	MOB	O	NOT4SS_NOT4CP_MOB_O_180	1145	1145	virb4	traU	t4cp1	t4cp2	t4cp3	MOBC	MOBF	MOBH	MOBPHEN@BATH001c01_011450&0.957082&3e-32	MOBQ	MOBV	MOBT	MOBB	F_traE	F_traH	F_traK	F_traL	F_traN	F_traU	F_traV	F_traW	F_trbC	G_ICEHIN1056_000310	G_ICEHIN1056_000410	G_ICEHIN1056_000440	G_ICEHIN1056_000510	G_ICEHIN1056_000520	I_traI	I_traK	I_traL	I_traM	I_traN	I_traP	I_traQ	I_traR	I_traW	I_traY
NC_004663	Bacteroides_thetaiotaomicron_VPI-5482,_complete_genome._	Bacteroidetes;	Bacteroidetes	circular	6260361	4778	T4SS	NOMOB	O	T4SS_T4CP_NOMOB_O_181	2340	2348	virb4@BATH001c01_023400&0.64369&1.1e-58	traU	t4cp1@BATH001c01_023480&0.981818&3.8e-08	t4cp2@BATH001c01_023480&0.936937&2.3e-21	t4cp3	MOBC	MOBF	MOBH	MOBPHEN	MOBQ	MOBV	MOBT	MOBB	F_traE	F_traH	F_traK	F_traL	F_traN	F_traU	F_traV	F_traW	F_trbC	G_ICEHIN1056_000310	G_ICEHIN1056_000410	G_ICEHIN1056_000440	G_ICEHIN1056_000510	G_ICEHIN1056_000520	I_traI	I_traK	I_traL	I_traM	I_traN	I_traP	I_traQ	I_traR	I_traW	I_traY
NC_004663	Bacteroides_thetaiotaomicron_VPI-5482,_complete_genome._	Bacteroidetes;	Bacteroidetes	circular	6260361	4778	T4SS	CONJ	O	T4SS_T4CP_MOB_O_182	2652	2663	virb4@BATH001c01_026520&0.73913&6.7e-87	traU	t4cp1@BATH001c01_026630&0.990909&2.6e-08	t4cp2@BATH001c01_026630&0.936937&8.6e-21	t4cp3	MOBC	MOBF	MOBH	MOBPHEN@BATH001c01_026620&0.596567&2.7e-29	MOBQ	MOBV	MOBT	MOBB	F_traE	F_traH	F_traK	F_traL	F_traN	F_traU	F_traV	F_traW	F_trbC	G_ICEHIN1056_000310	G_ICEHIN1056_000410	G_ICEHIN1056_000440	G_ICEHIN1056_000510	G_ICEHIN1056_000520	I_traI	I_traK	I_traL	I_traM	I_traN	I_traP	I_traQ	I_traR	I_traW	I_traY
NC_004663	Bacteroides_thetaiotaomicron_VPI-5482,_complete_genome._	Bacteroidetes;	Bacteroidetes	circular	6260361	4778	NOT4SS	MOB	O	NOT4SS_NOT4CP_MOB_O_184	3059	3059	virb4	traU	t4cp1	t4cp2	t4cp3	MOBC	MOBF	MOBH	MOBPHEN@BATH001c01_030590&0.95279&4.5e-12	MOBQ	MOBV	MOBT	MOBB	F_traE	F_traH	F_traK	F_traL	F_traN	F_traU	F_traV	F_traW	F_trbC	G_ICEHIN1056_000310	G_ICEHIN1056_000410	G_ICEHIN1056_000440	G_ICEHIN1056_000510	G_ICEHIN1056_000520	I_traI	I_traK	I_traL	I_traM	I_traN	I_traP	I_traQ	I_traR	I_traW	I_traY
NC_004663	Bacteroides_thetaiotaomicron_VPI-5482,_complete_genome._	Bacteroidetes;	Bacteroidetes	circular	6260361	4778	NOT4SS	MOB	O	NOT4SS_NOT4CP_MOB_O_185	3207	3207	virb4	traU	t4cp1	t4cp2	t4cp3	MOBC	MOBF	MOBH	MOBPHEN@BATH001c01_032070&0.918455&4.6e-32	MOBQ	MOBV	MOBT	MOBB	F_traE	F_traH	F_traK	F_traL	F_traN	F_traU	F_traV	F_traW	F_trbC	G_ICEHIN1056_000310	G_ICEHIN1056_000410	G_ICEHIN1056_000440	G_ICEHIN1056_000510	G_ICEHIN1056_000520	I_traI	I_traK	I_traL	I_traM	I_traN	I_traP	I_traQ	I_traR	I_traW	I_traY
NC_004663	Bacteroides_thetaiotaomicron_VPI-5482,_complete_genome._	Bacteroidetes;	Bacteroidetes	circular	6260361	4778	NOT4SS	MOB	O	NOT4SS_NOT4CP_MOB_O_186	4704	4704	virb4	traU	t4cp1	t4cp2	t4cp3	MOBC	MOBF	MOBH	MOBPHEN@BATH001c01_047040&0.95279&3.4e-31	MOBQ	MOBV	MOBT	MOBB	F_traE	F_traH	F_traK	F_traL	F_traN	F_traU	F_traV	F_traW	F_trbC	G_ICEHIN1056_000310	G_ICEHIN1056_000410	G_ICEHIN1056_000440	G_ICEHIN1056_000510	G_ICEHIN1056_000520	I_traI	I_traK	I_traL	I_traM	I_traN	I_traP	I_traQ	I_traR	I_traW	I_traY
NC_004663	Bacteroides_thetaiotaomicron_VPI-5482,_complete_genome._	Bacteroidetes;	Bacteroidetes	circular	6260361	4778	T4SS	CONJ	O	T4SS_T4CP_MOB_O_187	4842	4854	virb4@BATH001c01_048540&0.687169&1.4e-82	traU	t4cp1@BATH001c01_048420&0.981818&6.3e-09	t4cp2@BATH001c01_048420&0.914414&5e-23	t4cp3	MOBC	MOBF	MOBH	MOBPHEN@BATH001c01_048430&0.618026&2.5e-20	MOBQ	MOBV	MOBT	MOBB	F_traE	F_traH	F_traK	F_traL	F_traN	F_traU	F_traV	F_traW	F_trbC	G_ICEHIN1056_000310	G_ICEHIN1056_000410	G_ICEHIN1056_000440	G_ICEHIN1056_000510	G_ICEHIN1056_000520	I_traI	I_traK	I_traL	I_traM	I_traN	I_traP	I_traQ	I_traR	I_traW	I_traY
NC_010161	Bartonella_tribocorum_CIP_105476,_complete_genome._	Proteobacteria;	Alphaproteobacteria	circular	2619061	2074	T4SS	NOMOB	T	T4SS_T4CP_NOMOB_T_188	1499	1510	virb4@BATR001c01_015000&0.814422&4e-228	traU	t4cp1@BATR001c01_015100&0.990909&1.1e-18	t4cp2@BATR001c01_015100&1&1.3e-49	t4cp3	MOBC	MOBF	MOBH	MOBPHEN	MOBQ	MOBV	MOBT	MOBB	F_traE	F_traH	F_traK	F_traL	F_traN	F_traU	F_traV	F_traW	F_trbC	G_ICEHIN1056_000310	G_ICEHIN1056_000410	G_ICEHIN1056_000440	G_ICEHIN1056_000510	G_ICEHIN1056_000520	I_traI	I_traK	I_traL	I_traM	I_traN	I_traP	I_traQ	I_traR	I_traW	I_traY
NC_010161	Bartonella_tribocorum_CIP_105476,_complete_genome._	Proteobacteria;	Alphaproteobacteria	circular	2619061	2074	T4SS	NOMOB	T	T4SS_NOT4CP_NOMOB_T_190	1964	1981	virb4@BATR001c01_019650&0.822906&1.5e-232	traU	t4cp1	t4cp2	t4cp3	MOBC	MOBF	MOBH	MOBPHEN	MOBQ	MOBV	MOBT	MOBB	F_traE	F_traH	F_traK	F_traL	F_traN	F_traU	F_traV	F_traW	F_trbC	G_ICEHIN1056_000310	G_ICEHIN1056_000410	G_ICEHIN1056_000440	G_ICEHIN1056_000510	G_ICEHIN1056_000520	I_traI	I_traK	I_traL	I_traM	I_traN	I_traP	I_traQ	I_traR	I_traW	I_traY
NC_005957	Bacillus_thuringiensis_serovar_konkukian_str._97-27,_complete_genome._	Firmicutes;	Firmicutes	circular	5237682	5117	NOT4SS	MOB	O	NOT4SS_NOT4CP_MOB_O_193	4760	4760	virb4	traU	t4cp1	t4cp2	t4cp3	MOBC@BATU001c01_047600&0.540284&0.0013	MOBF	MOBH	MOBPHEN	MOBQ	MOBV	MOBT	MOBB	F_traE	F_traH	F_traK	F_traL	F_traN	F_traU	F_traV	F_traW	F_trbC	G_ICEHIN1056_000310	G_ICEHIN1056_000410	G_ICEHIN1056_000440	G_ICEHIN1056_000510	G_ICEHIN1056_000520	I_traI	I_traK	I_traL	I_traM	I_traN	I_traP	I_traQ	I_traR	I_traW	I_traY
NC_009614	Bacteroides_vulgatus_ATCC_8482,_complete_genome._	Bacteroidetes;	Bacteroidetes	circular	5163189	4065	T4SS	CONJ	O	T4SS_T4CP_MOB_O_197	665	675	virb4@BAVU001c01_006650&0.779427&3.3e-83	traU	t4cp1@BAVU001c01_006750&0.990909&1.8e-08	t4cp2@BAVU001c01_006750&0.941441&1.9e-21	t4cp3	MOBC	MOBF	MOBH	MOBPHEN@BAVU001c01_006740&0.592275&5.5e-26	MOBQ	MOBV	MOBT	MOBB	F_traE	F_traH	F_traK	F_traL	F_traN	F_traU	F_traV	F_traW	F_trbC	G_ICEHIN1056_000310	G_ICEHIN1056_000410	G_ICEHIN1056_000440	G_ICEHIN1056_000510	G_ICEHIN1056_000520	I_traI	I_traK	I_traL	I_traM	I_traN	I_traP	I_traQ	I_traR	I_traW	I_traY
NC_009614	Bacteroides_vulgatus_ATCC_8482,_complete_genome._	Bacteroidetes;	Bacteroidetes	circular	5163189	4065	T4SS	CONJ	O	T4SS_T4CP_MOB_O_198	922	960	virb4@BAVU001c01_009220&0.791092&2.4e-56	traU	t4cp1@BAVU001c01_009590&0.945455&2.9e-07	t4cp2@BAVU001c01_009590&0.914414&1.8e-24	t4cp3	MOBC	MOBF	MOBH	MOBPHEN@BAVU001c01_009600&0.515021&0.001	MOBQ	MOBV	MOBT	MOBB@BAVU001c01_009600&0.964286&5e-91	F_traE	F_traH	F_traK	F_traL	F_traN	F_traU	F_traV	F_traW	F_trbC	G_ICEHIN1056_000310	G_ICEHIN1056_000410	G_ICEHIN1056_000440	G_ICEHIN1056_000510	G_ICEHIN1056_000520	I_traI	I_traK	I_traL	I_traM	I_traN	I_traP	I_traQ	I_traR	I_traW	I_traY
NC_009614	Bacteroides_vulgatus_ATCC_8482,_complete_genome._	Bacteroidetes;	Bacteroidetes	circular	5163189	4065	T4SS	CONJ	O	T4SS_T4CP_MOB_O_199	1547	1555	virb4@BAVU001c01_015550&0.803818&2e-82	traU	t4cp1@BAVU001c01_015470&0.990909&1.8e-08	t4cp2@BAVU001c01_015470&0.941441&1.9e-21	t4cp3	MOBC	MOBF	MOBH	MOBPHEN@BAVU001c01_015480&0.592275&5.5e-26	MOBQ	MOBV	MOBT	MOBB	F_traE	F_traH	F_traK	F_traL	F_traN	F_traU	F_traV	F_traW	F_trbC	G_ICEHIN1056_000310	G_ICEHIN1056_000410	G_ICEHIN1056_000440	G_ICEHIN1056_000510	G_ICEHIN1056_000520	I_traI	I_traK	I_traL	I_traM	I_traN	I_traP	I_traQ	I_traR	I_traW	I_traY
NC_009614	Bacteroides_vulgatus_ATCC_8482,_complete_genome._	Bacteroidetes;	Bacteroidetes	circular	5163189	4065	NOT4SS	MOB	O	NOT4SS_NOT4CP_MOB_O_201	2452	2452	virb4	traU	t4cp1	t4cp2	t4cp3	MOBC	MOBF	MOBH	MOBPHEN	MOBQ	MOBV@BAVU001c01_024520&0.980392&6.1e-39	MOBT	MOBB	F_traE	F_traH	F_traK	F_traL	F_traN	F_traU	F_traV	F_traW	F_trbC	G_ICEHIN1056_000310	G_ICEHIN1056_000410	G_ICEHIN1056_000440	G_ICEHIN1056_000510	G_ICEHIN1056_000520	I_traI	I_traK	I_traL	I_traM	I_traN	I_traP	I_traQ	I_traR	I_traW	I_traY
NC_009614	Bacteroides_vulgatus_ATCC_8482,_complete_genome._	Bacteroidetes;	Bacteroidetes	circular	5163189	4065	T4SS	CONJ	O	T4SS_T4CP_MOB_O_202_O_203	3350	3457	virb4@BAVU001c01_033520&0.640509&1.1e-75	traU	t4cp1@BAVU001c01_033640&0.972727&4.7e-10@BAVU001c01_034570&0.990909&6.8e-09	t4cp2@BAVU001c01_033640&0.864865&1.9e-22@BAVU001c01_034570&0.923423&2.1e-25	t4cp3	MOBC	MOBF	MOBH	MOBPHEN	MOBQ	MOBV	MOBT	MOBB@BAVU001c01_034560&0.982143&1.2e-87	F_traE	F_traH	F_traK	F_traL	F_traN	F_traU	F_traV	F_traW	F_trbC	G_ICEHIN1056_000310	G_ICEHIN1056_000410	G_ICEHIN1056_000440	G_ICEHIN1056_000510	G_ICEHIN1056_000520	I_traI	I_traK	I_traL	I_traM	I_traN	I_traP	I_traQ	I_traR@BAVU001c01_033500&0.701493&0.00017	I_traW	I_traY
NC_009614	Bacteroides_vulgatus_ATCC_8482,_complete_genome._	Bacteroidetes;	Bacteroidetes	circular	5163189	4065	NOT4SS	MOB	O	NOT4SS_T4CP_MOB_O_204	3652	3703	virb4	traU	t4cp1@BAVU001c01_036930&0.945455&2.9e-07	t4cp2@BAVU001c01_036930&0.905405&5.7e-25	t4cp3	MOBC	MOBF	MOBH	MOBPHEN@BAVU001c01_037030&0.901288&4.6e-36@BAVU001c01_036520&0.888412&1.2e-30	MOBQ	MOBV	MOBT	MOBB	F_traE	F_traH	F_traK	F_traL	F_traN	F_traU	F_traV	F_traW	F_trbC	G_ICEHIN1056_000310	G_ICEHIN1056_000410	G_ICEHIN1056_000440	G_ICEHIN1056_000510	G_ICEHIN1056_000520	I_traI	I_traK	I_traL	I_traM	I_traN	I_traP	I_traQ	I_traR	I_traW	I_traY
NC_008618	Bifidobacterium_adolescentis_ATCC_15703,_complete_genome._	Actinobacteria;	Actinobacteria	circular	2089645	1631	NOT4SS	MOB	O	NOT4SS_T4CP_MOB_O_209	1296	1324	virb4	traU	t4cp1@BIAD001c01_012960&0.990909&1.7e-13	t4cp2@BIAD001c01_012960&0.990991&7.2e-26	t4cp3	MOBC	MOBF	MOBH	MOBPHEN@BIAD001c01_013240&0.914163&9.8e-25	MOBQ	MOBV	MOBT	MOBB	F_traE	F_traH	F_traK	F_traL	F_traN	F_traU	F_traV	F_traW	F_trbC	G_ICEHIN1056_000310	G_ICEHIN1056_000410	G_ICEHIN1056_000440	G_ICEHIN1056_000510	G_ICEHIN1056_000520	I_traI	I_traK	I_traL	I_traM	I_traN	I_traP	I_traQ	I_traR	I_traW	I_traY
NC_013714	Bifidobacterium_dentium_Bd1,_complete_genome._	Actinobacteria;	Actinobacteria	circular	2636367	2129	NOT4SS	MOB	O	NOT4SS_NOT4CP_MOB_O_210	75	75	virb4	traU	t4cp1	t4cp2	t4cp3	MOBC	MOBF	MOBH	MOBPHEN@BIDE001c01_000750&0.854077&2.3e-17	MOBQ	MOBV	MOBT	MOBB	F_traE	F_traH	F_traK	F_traL	F_traN	F_traU	F_traV	F_traW	F_trbC	G_ICEHIN1056_000310	G_ICEHIN1056_000410	G_ICEHIN1056_000440	G_ICEHIN1056_000510	G_ICEHIN1056_000520	I_traI	I_traK	I_traL	I_traM	I_traN	I_traP	I_traQ	I_traR	I_traW	I_traY
NC_013714	Bifidobacterium_dentium_Bd1,_complete_genome._	Actinobacteria;	Actinobacteria	circular	2636367	2129	NOT4SS	MOB	O	NOT4SS_T4CP_MOB_O_211	924	1003	virb4	traU	t4cp1@BIDE001c01_009410&0.981818&1.4e-09	t4cp2@BIDE001c01_009410&0.959459&2.7e-23	t4cp3	MOBC	MOBF@BIDE001c01_009240&0.979545&3.2e-129	MOBH	MOBPHEN	MOBQ	MOBV	MOBT	MOBB	F_traE	F_traH	F_traK	F_traL	F_traN	F_traU	F_traV	F_traW	F_trbC	G_ICEHIN1056_000310	G_ICEHIN1056_000410	G_ICEHIN1056_000440	G_ICEHIN1056_000510	G_ICEHIN1056_000520	I_traI	I_traK	I_traL	I_traM	I_traN	I_traP	I_traQ	I_traR	I_traW	I_traY
NC_010816	Bifidobacterium_longum_DJO10A,_complete_genome._	Actinobacteria;	Actinobacteria	circular	2375792	1990	NOT4SS	MOB	O	NOT4SS_T4CP_MOB_O_214	369	374	virb4	traU	t4cp1@BILO002c01_003740&0.990909&1.3e-10	t4cp2@BILO002c01_003740&0.990991&1.9e-27	t4cp3	MOBC	MOBF	MOBH	MOBPHEN@BILO002c01_003690&0.935622&1.4e-21	MOBQ	MOBV	MOBT	MOBB	F_traE	F_traH	F_traK	F_traL	F_traN	F_traU	F_traV	F_traW	F_trbC	G_ICEHIN1056_000310	G_ICEHIN1056_000410	G_ICEHIN1056_000440	G_ICEHIN1056_000510	G_ICEHIN1056_000520	I_traI	I_traK	I_traL	I_traM	I_traN	I_traP	I_traQ	I_traR	I_traW	I_traY
NC_010816	Bifidobacterium_longum_DJO10A,_complete_genome._	Actinobacteria;	Actinobacteria	circular	2375792	1990	T4SS	NOMOB	O	T4SS_NOT4CP_NOMOB_O_215	1880	1880	virb4@BILO002c01_018800&0.650053&1.4e-66	traU	t4cp1	t4cp2	t4cp3	MOBC	MOBF	MOBH	MOBPHEN	MOBQ	MOBV	MOBT	MOBB	F_traE	F_traH	F_traK	F_traL	F_traN	F_traU	F_traV	F_traW	F_trbC	G_ICEHIN1056_000310	G_ICEHIN1056_000410	G_ICEHIN1056_000440	G_ICEHIN1056_000510	G_ICEHIN1056_000520	I_traI	I_traK	I_traL	I_traM	I_traN	I_traP	I_traQ	I_traR	I_traW	I_traY
NC_010645	Bordetella_avium_197N,_complete_genome._	Proteobacteria;	Betaproteobacteria	circular	3732255	3381	NOT4SS	MOB	O	NOT4SS_NOT4CP_MOB_O_217	376	380	virb4	traU	t4cp1	t4cp2	t4cp3	MOBC	MOBF	MOBH	MOBPHEN@BOAV001c01_003800&0.875536&3.5e-31	MOBQ	MOBV	MOBT	MOBB	F_traE	F_traH	F_traK	F_traL	F_traN	F_traU	F_traV	F_traW	F_trbC	G_ICEHIN1056_000310	G_ICEHIN1056_000410	G_ICEHIN1056_000440	G_ICEHIN1056_000510	G_ICEHIN1056_000520	I_traI	I_traK	I_traL	I_traM	I_traN	I_traP	I_traQ	I_traR	I_traW	I_traY
NC_002927	Bordetella_bronchiseptica_RB50,_complete_genome._	Proteobacteria;	Betaproteobacteria	circular	5339179	4994	NOT4SS	MOB	O	NOT4SS_NOT4CP_MOB_O_218	492	497	virb4	traU	t4cp1	t4cp2	t4cp3	MOBC	MOBF	MOBH	MOBPHEN@BOBR001c01_004970&0.802575&1.3e-31	MOBQ	MOBV	MOBT	MOBB	F_traE	F_traH	F_traK	F_traL	F_traN	F_traU	F_traV	F_traW	F_trbC	G_ICEHIN1056_000310	G_ICEHIN1056_000410	G_ICEHIN1056_000440	G_ICEHIN1056_000510	G_ICEHIN1056_000520	I_traI	I_traK	I_traL	I_traM	I_traN	I_traP	I_traQ	I_traR	I_traW	I_traY
NC_002927	Bordetella_bronchiseptica_RB50,_complete_genome._	Proteobacteria;	Betaproteobacteria	circular	5339179	4994	T4SS	NOMOB	T	T4SS_NOT4CP_NOMOB_T_219	4939	4944	virb4@BOBR001c01_049400&0.818664&2.4e-203	traU	t4cp1	t4cp2	t4cp3	MOBC	MOBF	MOBH	MOBPHEN	MOBQ	MOBV	MOBT	MOBB	F_traE	F_traH	F_traK	F_traL	F_traN	F_traU	F_traV	F_traW	F_trbC	G_ICEHIN1056_000310	G_ICEHIN1056_000410	G_ICEHIN1056_000440	G_ICEHIN1056_000510	G_ICEHIN1056_000520	I_traI	I_traK	I_traL	I_traM	I_traN	I_traP	I_traQ	I_traR	I_traW	I_traY
NC_002928	Bordetella_parapertussis_12822,_complete_genome._	Proteobacteria;	Betaproteobacteria	circular	4773551	4185	T4SS	NOMOB	T	T4SS_NOT4CP_NOMOB_T_220	4133	4138	virb4@BOPA001c01_041340&0.818664&1.3e-202	traU	t4cp1	t4cp2	t4cp3	MOBC	MOBF	MOBH	MOBPHEN	MOBQ	MOBV	MOBT	MOBB	F_traE	F_traH	F_traK	F_traL	F_traN	F_traU	F_traV	F_traW	F_trbC	G_ICEHIN1056_000310	G_ICEHIN1056_000410	G_ICEHIN1056_000440	G_ICEHIN1056_000510	G_ICEHIN1056_000520	I_traI	I_traK	I_traL	I_traM	I_traN	I_traP	I_traQ	I_traR	I_traW	I_traY
NC_002929	Bordetella_pertussis_Tohama_I,_complete_genome._	Proteobacteria;	Betaproteobacteria	circular	4086189	3436	T4SS	NOMOB	T	T4SS_NOT4CP_NOMOB_T_221	3417	3422	virb4@BOPE001c01_034180&0.818664&5.7e-202	traU	t4cp1	t4cp2	t4cp3	MOBC	MOBF	MOBH	MOBPHEN	MOBQ	MOBV	MOBT	MOBB	F_traE	F_traH	F_traK	F_traL	F_traN	F_traU	F_traV	F_traW	F_trbC	G_ICEHIN1056_000310	G_ICEHIN1056_000410	G_ICEHIN1056_000440	G_ICEHIN1056_000510	G_ICEHIN1056_000520	I_traI	I_traK	I_traL	I_traM	I_traN	I_traP	I_traQ	I_traR	I_traW	I_traY
NC_010170	Bordetella_petrii_DSM_12804,_complete_genome._	Proteobacteria;	Betaproteobacteria	circular	5287950	5027	T4SS	CONJ	G	T4SS_T4CP_MOB_G_222	1078	1104	virb4@BOPT001c01_010930&0.816543&2.3e-90	traU	t4cp1@BOPT001c01_010830&0.990909&8.8e-11	t4cp2@BOPT001c01_010830&0.981982&2.6e-30	t4cp3	MOBC	MOBF	MOBH@BOPT001c01_011040&0.906863&4.6e-43	MOBPHEN	MOBQ	MOBV	MOBT	MOBB	F_traE@BOPT001c01_010890&0.544041&0.0002	F_traH	F_traK	F_traL	F_traN	F_traU	F_traV	F_traW	F_trbC	G_ICEHIN1056_000310@BOPT001c01_010780&0.970297&1.9e-74	G_ICEHIN1056_000410@BOPT001c01_010890&0.963801&2.9e-109	G_ICEHIN1056_000440@BOPT001c01_010920&0.963768&1.6e-64	G_ICEHIN1056_000510@BOPT001c01_010980&0.991247&2.1e-205	G_ICEHIN1056_000520@BOPT001c01_010970&0.963746&2.7e-149	I_traI	I_traK	I_traL	I_traM	I_traN	I_traP	I_traQ	I_traR	I_traW	I_traY
NC_010170	Bordetella_petrii_DSM_12804,_complete_genome._	Proteobacteria;	Betaproteobacteria	circular	5287950	5027	T4SS	CONJ	G	T4SS_T4CP_MOB_G_223	1359	1397	virb4@BOPT001c01_013770&0.818664&2.2e-93	traU	t4cp1@BOPT001c01_013640&0.990909&9.1e-11	t4cp2@BOPT001c01_013640&0.977477&3.4e-30	t4cp3	MOBC	MOBF	MOBH@BOPT001c01_013970&0.897059&7e-44	MOBPHEN	MOBQ	MOBV	MOBT	MOBB	F_traE	F_traH	F_traK	F_traL@BOPT001c01_013720&0.53&7.2e-06	F_traN	F_traU	F_traV	F_traW	F_trbC	G_ICEHIN1056_000310@BOPT001c01_013590&0.925743&1.9e-64	G_ICEHIN1056_000410@BOPT001c01_013730&0.959276&1.5e-107	G_ICEHIN1056_000440@BOPT001c01_013760&1&2.4e-63	G_ICEHIN1056_000510@BOPT001c01_013910&0.973742&4.7e-200	G_ICEHIN1056_000520@BOPT001c01_013900&0.978852&7.4e-148	I_traI	I_traK	I_traL	I_traM	I_traN	I_traP	I_traQ	I_traR	I_traW	I_traY
NC_010170	Bordetella_petrii_DSM_12804,_complete_genome._	Proteobacteria;	Betaproteobacteria	circular	5287950	5027	T4SS	CONJ	G	T4SS_T4CP_MOB_G_224	1493	1526	virb4@BOPT001c01_015120&0.559915&3.8e-81	traU	t4cp1@BOPT001c01_014980&0.990909&1.2e-10	t4cp2@BOPT001c01_014980&0.972973&8.4e-31	t4cp3	MOBC	MOBF	MOBH@BOPT001c01_015260&0.877451&2.2e-42	MOBPHEN	MOBQ	MOBV	MOBT	MOBB	F_traE@BOPT001c01_015050&0.569948&0.00023	F_traH	F_traK	F_traL	F_traN	F_traU	F_traV	F_traW	F_trbC	G_ICEHIN1056_000310@BOPT001c01_014930&0.970297&1e-75	G_ICEHIN1056_000410@BOPT001c01_015050&0.959276&2.5e-109	G_ICEHIN1056_000440@BOPT001c01_015080&0.978261&4.7e-65	G_ICEHIN1056_000510@BOPT001c01_015200&0.984683&3.1e-205	G_ICEHIN1056_000520@BOPT001c01_015190&0.993958&2.1e-152	I_traI	I_traK	I_traL	I_traM	I_traN	I_traP	I_traQ	I_traR	I_traW	I_traY
NC_010170	Bordetella_petrii_DSM_12804,_complete_genome._	Proteobacteria;	Betaproteobacteria	circular	5287950	5027	T4SS	CONJ	T	T4SS_T4CP_MOB_T_225	2215	2241	virb4@BOPT001c01_022360&0.801697&1.9e-186	traU	t4cp1@BOPT001c01_022310&1&9.1e-25	t4cp2@BOPT001c01_022310&1&3.6e-56	t4cp3	MOBC	MOBF	MOBH	MOBPHEN@BOPT001c01_022150&0.733906&2.1e-23	MOBQ	MOBV	MOBT	MOBB	F_traE	F_traH	F_traK	F_traL	F_traN	F_traU	F_traV	F_traW	F_trbC	G_ICEHIN1056_000310	G_ICEHIN1056_000410	G_ICEHIN1056_000440	G_ICEHIN1056_000510	G_ICEHIN1056_000520	I_traI	I_traK	I_traL	I_traM	I_traN	I_traP	I_traQ	I_traR	I_traW	I_traY
NC_010170	Bordetella_petrii_DSM_12804,_complete_genome._	Proteobacteria;	Betaproteobacteria	circular	5287950	5027	T4SS	CONJ	T	T4SS_T4CP_MOB_T_226	3760	3825	virb4@BOPT001c01_037610&0.823966&2.3e-199	traU	t4cp1@BOPT001c01_037750&0.863636&2.2e-11	t4cp2@BOPT001c01_037750&0.891892&2.1e-35	t4cp3	MOBC	MOBF@BOPT001c01_038250&0.926136&7.1e-202	MOBH	MOBPHEN	MOBQ	MOBV	MOBT	MOBB	F_traE	F_traH	F_traK	F_traL	F_traN	F_traU	F_traV	F_traW	F_trbC	G_ICEHIN1056_000310	G_ICEHIN1056_000410	G_ICEHIN1056_000440	G_ICEHIN1056_000510	G_ICEHIN1056_000520	I_traI	I_traK	I_traL	I_traM	I_traN	I_traP	I_traQ	I_traR	I_traW	I_traY
NC_010170	Bordetella_petrii_DSM_12804,_complete_genome._	Proteobacteria;	Betaproteobacteria	circular	5287950	5027	T4SS	CONJ	G	T4SS_T4CP_MOB_G_227	4263	4343	virb4@BOPT001c01_043270&0.817603&1.1e-90	traU	t4cp1@BOPT001c01_043370&0.990909&1.8e-10@BOPT001c01_042630&0.990909&1.3e-10	t4cp2@BOPT001c01_043370&0.972973&8.4e-31@BOPT001c01_042630&0.779279&3.1e-24	t4cp3	MOBC	MOBF	MOBH@BOPT001c01_043160&0.906863&1.7e-43	MOBPHEN	MOBQ	MOBV	MOBT	MOBB	F_traE	F_traH	F_traK	F_traL	F_traN	F_traU	F_traV	F_traW	F_trbC	G_ICEHIN1056_000310@BOPT001c01_043430&0.915842&1.7e-73	G_ICEHIN1056_000410@BOPT001c01_043310&0.959276&6e-108	G_ICEHIN1056_000440@BOPT001c01_043280&0.985507&3.4e-63	G_ICEHIN1056_000510@BOPT001c01_043220&0.984683&6.8e-205	G_ICEHIN1056_000520@BOPT001c01_043230&0.996979&1.4e-151	I_traI	I_traK	I_traL	I_traM	I_traN	I_traP	I_traQ	I_traR	I_traW	I_traY
NC_010170	Bordetella_petrii_DSM_12804,_complete_genome._	Proteobacteria;	Betaproteobacteria	circular	5287950	5027	T4SS	CONJ	T	T4SS_T4CP_MOB_T_228	4635	4692	virb4@BOPT001c01_046870&0.826087&1.5e-175	traU	t4cp1@BOPT001c01_046820&1&3.6e-24	t4cp2@BOPT001c01_046820&1&3.1e-52	t4cp3	MOBC	MOBF	MOBH	MOBPHEN@BOPT001c01_046350&0.652361&1.7e-25	MOBQ	MOBV	MOBT	MOBB	F_traE	F_traH	F_traK	F_traL	F_traN	F_traU	F_traV	F_traW	F_trbC	G_ICEHIN1056_000310	G_ICEHIN1056_000410	G_ICEHIN1056_000440	G_ICEHIN1056_000510	G_ICEHIN1056_000520	I_traI	I_traK	I_traL	I_traM	I_traN	I_traP	I_traQ	I_traR	I_traW	I_traY
NC_006933	Brucella_abortus_biovar_1_str._9-941_chromosome_II,_complete_sequence._	Proteobacteria;	Alphaproteobacteria	circular	1162204	1055	T4SS	NOMOB	T	T4SS_NOT4CP_NOMOB_T_229	60	66	virb4@BRAB001c02_000650&0.828208&1.3e-224	traU	t4cp1	t4cp2	t4cp3	MOBC	MOBF	MOBH	MOBPHEN	MOBQ	MOBV	MOBT	MOBB	F_traE	F_traH	F_traK	F_traL	F_traN	F_traU	F_traV	F_traW	F_trbC	G_ICEHIN1056_000310	G_ICEHIN1056_000410	G_ICEHIN1056_000440	G_ICEHIN1056_000510	G_ICEHIN1056_000520	I_traI	I_traK	I_traL	I_traM	I_traN	I_traP	I_traQ	I_traR	I_traW	I_traY
NC_010740	Brucella_abortus_S19_chromosome_2,_complete_sequence._	Proteobacteria;	Alphaproteobacteria	circular	1161449	1033	T4SS	NOMOB	T	T4SS_NOT4CP_NOMOB_T_230	54	60	virb4@BRAB002c02_000590&0.828208&1.3e-224	traU	t4cp1	t4cp2	t4cp3	MOBC	MOBF	MOBH	MOBPHEN	MOBQ	MOBV	MOBT	MOBB	F_traE	F_traH	F_traK	F_traL	F_traN	F_traU	F_traV	F_traW	F_trbC	G_ICEHIN1056_000310	G_ICEHIN1056_000410	G_ICEHIN1056_000440	G_ICEHIN1056_000510	G_ICEHIN1056_000520	I_traI	I_traK	I_traL	I_traM	I_traN	I_traP	I_traQ	I_traR	I_traW	I_traY
NC_009504	Brucella_ovis_ATCC_25840_chromosome_II,_complete_sequence._	Proteobacteria;	Alphaproteobacteria	circular	1164220	962	T4SS	NOMOB	T	T4SS_NOT4CP_NOMOB_T_231	51	56	virb4@BRAV001c02_000550&0.828208&6e-224	traU	t4cp1	t4cp2	t4cp3	MOBC	MOBF	MOBH	MOBPHEN	MOBQ	MOBV	MOBT	MOBB	F_traE	F_traH	F_traK	F_traL	F_traN	F_traU	F_traV	F_traW	F_trbC	G_ICEHIN1056_000310	G_ICEHIN1056_000410	G_ICEHIN1056_000440	G_ICEHIN1056_000510	G_ICEHIN1056_000520	I_traI	I_traK	I_traL	I_traM	I_traN	I_traP	I_traQ	I_traR	I_traW	I_traY
NC_010104	Brucella_canis_ATCC_23365_chromosome_II,_complete_sequence._	Proteobacteria;	Alphaproteobacteria	circular	1206800	1149	T4SS	NOMOB	T	T4SS_NOT4CP_NOMOB_T_232	58	64	virb4@BRCA001c02_000630&0.828208&1.6e-224	traU	t4cp1	t4cp2	t4cp3	MOBC	MOBF	MOBH	MOBPHEN	MOBQ	MOBV	MOBT	MOBB	F_traE	F_traH	F_traK	F_traL	F_traN	F_traU	F_traV	F_traW	F_trbC	G_ICEHIN1056_000310	G_ICEHIN1056_000410	G_ICEHIN1056_000440	G_ICEHIN1056_000510	G_ICEHIN1056_000520	I_traI	I_traK	I_traL	I_traM	I_traN	I_traP	I_traQ	I_traR	I_traW	I_traY
NC_010104	Brucella_canis_ATCC_23365_chromosome_II,_complete_sequence._	Proteobacteria;	Alphaproteobacteria	circular	1206800	1149	NOT4SS	MOB	O	NOT4SS_NOT4CP_MOB_O_233	346	352	virb4	traU	t4cp1	t4cp2	t4cp3	MOBC	MOBF	MOBH	MOBPHEN@BRCA001c02_003520&0.905579&1.2e-41	MOBQ	MOBV	MOBT	MOBB	F_traE	F_traH	F_traK	F_traL	F_traN	F_traU	F_traV	F_traW	F_trbC	G_ICEHIN1056_000310	G_ICEHIN1056_000410	G_ICEHIN1056_000440	G_ICEHIN1056_000510	G_ICEHIN1056_000520	I_traI	I_traK	I_traL	I_traM	I_traN	I_traP	I_traQ	I_traR	I_traW	I_traY
NC_004463	Bradyrhizobium_japonicum_USDA_110,_complete_genome._	Proteobacteria;	Alphaproteobacteria	circular	9105828	8317	NOT4SS	MOB	O	NOT4SS_T4CP_MOB_O_235	43	89	virb4	traU	t4cp1@BRJA001c01_000430&1&1.4e-25	t4cp2@BRJA001c01_000430&1&1.3e-52	t4cp3	MOBC	MOBF	MOBH	MOBPHEN@BRJA001c01_000440&0.866953&6.7e-29	MOBQ	MOBV	MOBT	MOBB	F_traE	F_traH	F_traK	F_traL	F_traN	F_traU	F_traV	F_traW	F_trbC	G_ICEHIN1056_000310	G_ICEHIN1056_000410	G_ICEHIN1056_000440	G_ICEHIN1056_000510	G_ICEHIN1056_000520	I_traI	I_traK@BRJA001c01_000890&0.62069&1.4e-05	I_traL	I_traM	I_traN	I_traP	I_traQ	I_traR	I_traW	I_traY
NC_004463	Bradyrhizobium_japonicum_USDA_110,_complete_genome._	Proteobacteria;	Alphaproteobacteria	circular	9105828	8317	NOT4SS	MOB	O	NOT4SS_NOT4CP_MOB_O_238	1963	1963	virb4	traU	t4cp1	t4cp2	t4cp3	MOBC	MOBF	MOBH	MOBPHEN	MOBQ@BRJA001c01_019630&0.589862&1.7e-47	MOBV	MOBT	MOBB	F_traE	F_traH	F_traK	F_traL	F_traN	F_traU	F_traV	F_traW	F_trbC	G_ICEHIN1056_000310	G_ICEHIN1056_000410	G_ICEHIN1056_000440	G_ICEHIN1056_000510	G_ICEHIN1056_000520	I_traI	I_traK	I_traL	I_traM	I_traN	I_traP	I_traQ	I_traR	I_traW	I_traY
NC_004463	Bradyrhizobium_japonicum_USDA_110,_complete_genome._	Proteobacteria;	Alphaproteobacteria	circular	9105828	8317	T4SS	NOMOB	T	T4SS_NOT4CP_NOMOB_T_243	8333	8339	virb4@BRJA001c01_083380&0.816543&5.8e-176	traU	t4cp1	t4cp2	t4cp3	MOBC	MOBF	MOBH	MOBPHEN	MOBQ	MOBV	MOBT	MOBB	F_traE	F_traH	F_traK	F_traL	F_traN	F_traU	F_traV	F_traW	F_trbC	G_ICEHIN1056_000310	G_ICEHIN1056_000410	G_ICEHIN1056_000440	G_ICEHIN1056_000510	G_ICEHIN1056_000520	I_traI	I_traK	I_traL	I_traM	I_traN	I_traP	I_traQ	I_traR	I_traW	I_traY
NC_003318	Brucella_melitensis_16M_chromosome_II,_complete_sequence._	Proteobacteria;	Alphaproteobacteria	circular	1177787	1139	T4SS	NOMOB	T	T4SS_NOT4CP_NOMOB_T_244	27	33	virb4@BRME001c02_000280&0.828208&1.1e-224	traU	t4cp1	t4cp2	t4cp3	MOBC	MOBF	MOBH	MOBPHEN	MOBQ	MOBV	MOBT	MOBB	F_traE	F_traH	F_traK	F_traL	F_traN	F_traU	F_traV	F_traW	F_trbC	G_ICEHIN1056_000310	G_ICEHIN1056_000410	G_ICEHIN1056_000440	G_ICEHIN1056_000510	G_ICEHIN1056_000520	I_traI	I_traK	I_traL	I_traM	I_traN	I_traP	I_traQ	I_traR	I_traW	I_traY
NC_003318	Brucella_melitensis_16M_chromosome_II,_complete_sequence._	Proteobacteria;	Alphaproteobacteria	circular	1177787	1139	NOT4SS	NOMOB	O	NOT4SS_NOT4CP_NOMOB_O_245	1092	1092	virb4	traU	t4cp1	t4cp2	t4cp3	MOBC	MOBF	MOBH	MOBPHEN	MOBQ	MOBV	MOBT	MOBB	F_traE	F_traH	F_traK	F_traL	F_traN	F_traU	F_traV	F_traW	F_trbC	G_ICEHIN1056_000310	G_ICEHIN1056_000410	G_ICEHIN1056_000440	G_ICEHIN1056_000510	G_ICEHIN1056_000520	I_traI	I_traK	I_traL	I_traM	I_traN	I_traP	I_traQ@BRME001c02_010920&0.530726&0.00029	I_traR	I_traW	I_traY
NC_007624	Brucella_melitensis_biovar_Abortus_2308_chromosome_II,_complete_sequence._	Proteobacteria;	Alphaproteobacteria	circular	1156948	1034	T4SS	NOMOB	T	T4SS_NOT4CP_NOMOB_T_246	58	64	virb4@BRME002c02_000630&0.828208&1.3e-224	traU	t4cp1	t4cp2	t4cp3	MOBC	MOBF	MOBH	MOBPHEN	MOBQ	MOBV	MOBT	MOBB	F_traE	F_traH	F_traK	F_traL	F_traN	F_traU	F_traV	F_traW	F_trbC	G_ICEHIN1056_000310	G_ICEHIN1056_000410	G_ICEHIN1056_000440	G_ICEHIN1056_000510	G_ICEHIN1056_000520	I_traI	I_traK	I_traL	I_traM	I_traN	I_traP	I_traQ	I_traR	I_traW	I_traY
NC_012442	Brucella_melitensis_ATCC_23457_chromosome_II,_complete_genome._	Proteobacteria;	Alphaproteobacteria	circular	1185518	1072	T4SS	NOMOB	T	T4SS_NOT4CP_NOMOB_T_247	58	64	virb4@BRME003c01_000630&0.828208&1.3e-224	traU	t4cp1	t4cp2	t4cp3	MOBC	MOBF	MOBH	MOBPHEN	MOBQ	MOBV	MOBT	MOBB	F_traE	F_traH	F_traK	F_traL	F_traN	F_traU	F_traV	F_traW	F_trbC	G_ICEHIN1056_000310	G_ICEHIN1056_000410	G_ICEHIN1056_000440	G_ICEHIN1056_000510	G_ICEHIN1056_000520	I_traI	I_traK	I_traL	I_traM	I_traN	I_traP	I_traQ	I_traR	I_traW	I_traY
NC_013118	Brucella_microti_CCM_4915_chromosome_2,_complete_genome._	Proteobacteria;	Alphaproteobacteria	circular	1220319	1167	T4SS	NOMOB	T	T4SS_NOT4CP_NOMOB_T_248	63	69	virb4@BRMI001c02_000680&0.828208&3.5e-225	traU	t4cp1	t4cp2	t4cp3	MOBC	MOBF	MOBH	MOBPHEN	MOBQ	MOBV	MOBT	MOBB	F_traE	F_traH	F_traK	F_traL	F_traN	F_traU	F_traV	F_traW	F_trbC	G_ICEHIN1056_000310	G_ICEHIN1056_000410	G_ICEHIN1056_000440	G_ICEHIN1056_000510	G_ICEHIN1056_000520	I_traI	I_traK	I_traL	I_traM	I_traN	I_traP	I_traQ	I_traR	I_traW	I_traY
NC_013118	Brucella_microti_CCM_4915_chromosome_2,_complete_genome._	Proteobacteria;	Alphaproteobacteria	circular	1220319	1167	NOT4SS	MOB	O	NOT4SS_NOT4CP_MOB_O_249	355	362	virb4	traU	t4cp1	t4cp2	t4cp3	MOBC	MOBF	MOBH	MOBPHEN@BRMI001c02_003620&0.905579&1.2e-41	MOBQ	MOBV	MOBT	MOBB	F_traE	F_traH	F_traK	F_traL	F_traN	F_traU	F_traV	F_traW	F_trbC	G_ICEHIN1056_000310	G_ICEHIN1056_000410	G_ICEHIN1056_000440	G_ICEHIN1056_000510	G_ICEHIN1056_000520	I_traI	I_traK	I_traL	I_traM	I_traN	I_traP	I_traQ	I_traR	I_traW	I_traY
NC_009445	Bradyrhizobium_sp._ORS278,_complete_genome._	Proteobacteria;	Alphaproteobacteria	circular	7456587	6717	NOT4SS	MOB	O	NOT4SS_NOT4CP_MOB_O_251	742	742	virb4	traU	t4cp1	t4cp2	t4cp3	MOBC	MOBF@BRSP001c01_007420&0.610227&1.8e-69&5.4e-23	MOBH	MOBPHEN	MOBQ@BRSP001c01_007420&0.995392&1.1e-78	MOBV	MOBT	MOBB	F_traE	F_traH	F_traK	F_traL	F_traN	F_traU	F_traV	F_traW	F_trbC	G_ICEHIN1056_000310	G_ICEHIN1056_000410	G_ICEHIN1056_000440	G_ICEHIN1056_000510	G_ICEHIN1056_000520	I_traI	I_traK	I_traL	I_traM	I_traN	I_traP	I_traQ	I_traR	I_traW	I_traY
NC_009445	Bradyrhizobium_sp._ORS278,_complete_genome._	Proteobacteria;	Alphaproteobacteria	circular	7456587	6717	NOT4SS	MOB	O	NOT4SS_NOT4CP_MOB_O_252	1166	1166	virb4	traU	t4cp1	t4cp2	t4cp3	MOBC	MOBF@BRSP001c01_011660&0.610227&7.4e-69&2.1e-23	MOBH	MOBPHEN	MOBQ@BRSP001c01_011660&0.995392&1.1e-80	MOBV	MOBT	MOBB	F_traE	F_traH	F_traK	F_traL	F_traN	F_traU	F_traV	F_traW	F_trbC	G_ICEHIN1056_000310	G_ICEHIN1056_000410	G_ICEHIN1056_000440	G_ICEHIN1056_000510	G_ICEHIN1056_000520	I_traI	I_traK	I_traL	I_traM	I_traN	I_traP	I_traQ	I_traR	I_traW	I_traY
NC_009445	Bradyrhizobium_sp._ORS278,_complete_genome._	Proteobacteria;	Alphaproteobacteria	circular	7456587	6717	NOT4SS	MOB	O	NOT4SS_NOT4CP_MOB_O_255	5891	5891	virb4	traU	t4cp1	t4cp2	t4cp3	MOBC	MOBF@BRSP001c01_058910&0.6125&2.4e-67&2.6e-24	MOBH	MOBPHEN	MOBQ@BRSP001c01_058910&0.995392&1.9e-79	MOBV	MOBT	MOBB	F_traE	F_traH	F_traK	F_traL	F_traN	F_traU	F_traV	F_traW	F_trbC	G_ICEHIN1056_000310	G_ICEHIN1056_000410	G_ICEHIN1056_000440	G_ICEHIN1056_000510	G_ICEHIN1056_000520	I_traI	I_traK	I_traL	I_traM	I_traN	I_traP	I_traQ	I_traR	I_traW	I_traY
NC_009485	Bradyrhizobium_sp._BTAi1,_complete_genome._	Proteobacteria;	Alphaproteobacteria	circular	8264687	7394	NOT4SS	MOB	O	NOT4SS_NOT4CP_MOB_O_257	422	422	virb4	traU	t4cp1	t4cp2	t4cp3	MOBC	MOBF@BRSP002c01_004220&0.601136&6.4e-69&4.1e-22	MOBH	MOBPHEN	MOBQ@BRSP002c01_004220&0.995392&7e-81	MOBV	MOBT	MOBB	F_traE	F_traH	F_traK	F_traL	F_traN	F_traU	F_traV	F_traW	F_trbC	G_ICEHIN1056_000310	G_ICEHIN1056_000410	G_ICEHIN1056_000440	G_ICEHIN1056_000510	G_ICEHIN1056_000520	I_traI	I_traK	I_traL	I_traM	I_traN	I_traP	I_traQ	I_traR	I_traW	I_traY
NC_009485	Bradyrhizobium_sp._BTAi1,_complete_genome._	Proteobacteria;	Alphaproteobacteria	circular	8264687	7394	T4SS	CONJ	T	T4SS_T4CP_MOB_T_258	1425	1440	virb4@BRSP002c01_014360&0.817603&8.8e-173	traU	t4cp1@BRSP002c01_014260&1&1.9e-22	t4cp2@BRSP002c01_014260&1&9.5e-56	t4cp3	MOBC	MOBF	MOBH	MOBPHEN@BRSP002c01_014250&0.690987&8.9e-24	MOBQ	MOBV	MOBT	MOBB	F_traE	F_traH	F_traK	F_traL	F_traN	F_traU	F_traV	F_traW	F_trbC	G_ICEHIN1056_000310	G_ICEHIN1056_000410	G_ICEHIN1056_000440	G_ICEHIN1056_000510	G_ICEHIN1056_000520	I_traI	I_traK	I_traL	I_traM	I_traN	I_traP	I_traQ	I_traR	I_traW	I_traY
NC_009485	Bradyrhizobium_sp._BTAi1,_complete_genome._	Proteobacteria;	Alphaproteobacteria	circular	8264687	7394	T4SS	CONJ	T	T4SS_T4CP_MOB_T_260	3174	3193	virb4@BRSP002c01_031880&0.80912&5.5e-170	traU	t4cp1@BRSP002c01_031780&1&3.5e-25	t4cp2@BRSP002c01_031780&1&8.6e-55	t4cp3	MOBC	MOBF	MOBH	MOBPHEN@BRSP002c01_031740&0.83691&1.5e-26	MOBQ	MOBV	MOBT	MOBB	F_traE	F_traH	F_traK	F_traL	F_traN	F_traU	F_traV	F_traW	F_trbC	G_ICEHIN1056_000310	G_ICEHIN1056_000410	G_ICEHIN1056_000440	G_ICEHIN1056_000510	G_ICEHIN1056_000520	I_traI	I_traK	I_traL	I_traM	I_traN	I_traP	I_traQ	I_traR	I_traW	I_traY
NC_009485	Bradyrhizobium_sp._BTAi1,_complete_genome._	Proteobacteria;	Alphaproteobacteria	circular	8264687	7394	NOT4SS	MOB	O	NOT4SS_NOT4CP_MOB_O_262	6033	6033	virb4	traU	t4cp1	t4cp2	t4cp3	MOBC	MOBF@BRSP002c01_060330&0.611364&1.5e-67&3.2e-23	MOBH	MOBPHEN	MOBQ@BRSP002c01_060330&0.995392&4.2e-79	MOBV	MOBT	MOBB	F_traE	F_traH	F_traK	F_traL	F_traN	F_traU	F_traV	F_traW	F_trbC	G_ICEHIN1056_000310	G_ICEHIN1056_000410	G_ICEHIN1056_000440	G_ICEHIN1056_000510	G_ICEHIN1056_000520	I_traI	I_traK	I_traL	I_traM	I_traN	I_traP	I_traQ	I_traR	I_traW	I_traY
NC_009485	Bradyrhizobium_sp._BTAi1,_complete_genome._	Proteobacteria;	Alphaproteobacteria	circular	8264687	7394	NOT4SS	MOB	O	NOT4SS_T4CP_MOB_O_263	6922	6932	virb4	traU	t4cp1@BRSP002c01_069220&0.981818&2.3e-07	t4cp2@BRSP002c01_069220&0.68018&3.1e-18	t4cp3	MOBC	MOBF@BRSP002c01_069320&0.930682&4.3e-127&1e-18	MOBH	MOBPHEN	MOBQ	MOBV	MOBT	MOBB	F_traE	F_traH	F_traK	F_traL	F_traN	F_traU	F_traV	F_traW	F_trbC	G_ICEHIN1056_000310	G_ICEHIN1056_000410	G_ICEHIN1056_000440	G_ICEHIN1056_000510	G_ICEHIN1056_000520	I_traI	I_traK	I_traL	I_traM	I_traN	I_traP	I_traQ	I_traR	I_traW	I_traY
NC_009485	Bradyrhizobium_sp._BTAi1,_complete_genome._	Proteobacteria;	Alphaproteobacteria	circular	8264687	7394	T4SS	CONJ	T	T4SS_T4CP_MOB_T_264	7047	7084	virb4@BRSP002c01_070530&0.822906&1.3e-176	traU	t4cp1@BRSP002c01_070480&1&6e-26	t4cp2@BRSP002c01_070480&1&2.1e-56	t4cp3	MOBC	MOBF	MOBH	MOBPHEN@BRSP002c01_070470&0.83691&4.2e-26	MOBQ	MOBV	MOBT	MOBB	F_traE	F_traH	F_traK	F_traL	F_traN	F_traU	F_traV	F_traW	F_trbC	G_ICEHIN1056_000310	G_ICEHIN1056_000410	G_ICEHIN1056_000440	G_ICEHIN1056_000510	G_ICEHIN1056_000520	I_traI	I_traK@BRSP002c01_070840&0.666667&9.6e-06	I_traL	I_traM	I_traN	I_traP	I_traQ	I_traR	I_traW	I_traY
NC_009485	Bradyrhizobium_sp._BTAi1,_complete_genome._	Proteobacteria;	Alphaproteobacteria	circular	8264687	7394	T4SS	CONJ	T	T4SS_T4CP_MOB_T_266	7332	7343	virb4@BRSP002c01_073380&0.827147&2.4e-173	traU	t4cp1@BRSP002c01_073330&1&8.2e-26	t4cp2@BRSP002c01_073330&1&1.8e-55	t4cp3	MOBC	MOBF	MOBH	MOBPHEN@BRSP002c01_073320&0.811159&1.5e-30	MOBQ	MOBV	MOBT	MOBB	F_traE	F_traH	F_traK	F_traL	F_traN	F_traU	F_traV	F_traW	F_trbC	G_ICEHIN1056_000310	G_ICEHIN1056_000410	G_ICEHIN1056_000440	G_ICEHIN1056_000510	G_ICEHIN1056_000520	I_traI	I_traK	I_traL	I_traM	I_traN	I_traP	I_traQ	I_traR	I_traW	I_traY
NC_004311	Brucella_suis_1330_chromosome_II,_complete_sequence._	Proteobacteria;	Alphaproteobacteria	circular	1207381	1148	T4SS	NOMOB	T	T4SS_NOT4CP_NOMOB_T_267	62	68	virb4@BRSU001c02_000670&0.828208&2.7e-225	traU	t4cp1	t4cp2	t4cp3	MOBC	MOBF	MOBH	MOBPHEN	MOBQ	MOBV	MOBT	MOBB	F_traE	F_traH	F_traK	F_traL	F_traN	F_traU	F_traV	F_traW	F_trbC	G_ICEHIN1056_000310	G_ICEHIN1056_000410	G_ICEHIN1056_000440	G_ICEHIN1056_000510	G_ICEHIN1056_000520	I_traI	I_traK	I_traL	I_traM	I_traN	I_traP	I_traQ	I_traR	I_traW	I_traY
NC_004311	Brucella_suis_1330_chromosome_II,_complete_sequence._	Proteobacteria;	Alphaproteobacteria	circular	1207381	1148	NOT4SS	MOB	O	NOT4SS_NOT4CP_MOB_O_268	354	361	virb4	traU	t4cp1	t4cp2	t4cp3	MOBC	MOBF	MOBH	MOBPHEN@BRSU001c02_003610&0.905579&1.2e-41	MOBQ	MOBV	MOBT	MOBB	F_traE	F_traH	F_traK	F_traL	F_traN	F_traU	F_traV	F_traW	F_trbC	G_ICEHIN1056_000310	G_ICEHIN1056_000410	G_ICEHIN1056_000440	G_ICEHIN1056_000510	G_ICEHIN1056_000520	I_traI	I_traK	I_traL	I_traM	I_traN	I_traP	I_traQ	I_traR	I_traW	I_traY
NC_010167	Brucella_suis_ATCC_23445_chromosome_II,_complete_sequence._	Proteobacteria;	Alphaproteobacteria	circular	1400844	1320	T4SS	NOMOB	T	T4SS_NOT4CP_NOMOB_T_269	61	67	virb4@BRSU002c02_000660&0.828208&6.4e-225	traU	t4cp1	t4cp2	t4cp3	MOBC	MOBF	MOBH	MOBPHEN	MOBQ	MOBV	MOBT	MOBB	F_traE	F_traH	F_traK	F_traL	F_traN	F_traU	F_traV	F_traW	F_trbC	G_ICEHIN1056_000310	G_ICEHIN1056_000410	G_ICEHIN1056_000440	G_ICEHIN1056_000510	G_ICEHIN1056_000520	I_traI	I_traK	I_traL	I_traM	I_traN	I_traP	I_traQ	I_traR	I_traW	I_traY
NC_010167	Brucella_suis_ATCC_23445_chromosome_II,_complete_sequence._	Proteobacteria;	Alphaproteobacteria	circular	1400844	1320	NOT4SS	MOB	O	NOT4SS_NOT4CP_MOB_O_271	345	351	virb4	traU	t4cp1	t4cp2	t4cp3	MOBC	MOBF	MOBH	MOBPHEN@BRSU002c02_003510&0.905579&1.2e-41	MOBQ	MOBV	MOBT	MOBB	F_traE	F_traH	F_traK	F_traL	F_traN	F_traU	F_traV	F_traW	F_trbC	G_ICEHIN1056_000310	G_ICEHIN1056_000410	G_ICEHIN1056_000440	G_ICEHIN1056_000510	G_ICEHIN1056_000520	I_traI	I_traK	I_traL	I_traM	I_traN	I_traP	I_traQ	I_traR	I_traW	I_traY
NC_008060	Burkholderia_cenocepacia_AU_1054_chromosome_1,_complete_sequence._	Proteobacteria;	Betaproteobacteria	circular	3294563	2965	NOT4SS	MOB	O	NOT4SS_NOT4CP_MOB_O_273	309	309	virb4	traU	t4cp1	t4cp2	t4cp3	MOBC	MOBF	MOBH	MOBPHEN@BUCC001c01_003090&0.866953&9.5e-25	MOBQ	MOBV	MOBT	MOBB	F_traE	F_traH	F_traK	F_traL	F_traN	F_traU	F_traV	F_traW	F_trbC	G_ICEHIN1056_000310	G_ICEHIN1056_000410	G_ICEHIN1056_000440	G_ICEHIN1056_000510	G_ICEHIN1056_000520	I_traI	I_traK	I_traL	I_traM	I_traN	I_traP	I_traQ	I_traR	I_traW	I_traY
NC_008061	Burkholderia_cenocepacia_AU_1054_chromosome_2,_complete_sequence._	Proteobacteria;	Betaproteobacteria	circular	2788459	2472	T4SS	CONJ	T	T4SS_T4CP_MOB_T_275	1845	1857	virb4@BUCC001c02_018560&0.816543&9.6e-216	traU	t4cp1@BUCC001c02_018490&1&5.3e-29	t4cp2@BUCC001c02_018490&0.995495&1e-60	t4cp3	MOBC	MOBF	MOBH	MOBPHEN@BUCC001c02_018450&0.871245&3.6e-25	MOBQ	MOBV	MOBT	MOBB	F_traE	F_traH	F_traK	F_traL	F_traN	F_traU	F_traV	F_traW	F_trbC	G_ICEHIN1056_000310	G_ICEHIN1056_000410	G_ICEHIN1056_000440	G_ICEHIN1056_000510	G_ICEHIN1056_000520	I_traI	I_traK	I_traL	I_traM	I_traN	I_traP	I_traQ	I_traR	I_traW	I_traY
NC_008542	Burkholderia_cenocepacia_HI2424_chromosome_1,_complete_sequence._	Proteobacteria;	Betaproteobacteria	circular	3483902	3159	NOT4SS	MOB	O	NOT4SS_NOT4CP_MOB_O_277	812	812	virb4	traU	t4cp1	t4cp2	t4cp3	MOBC	MOBF	MOBH	MOBPHEN@BUCC003c01_008120&0.871245&6.2e-25	MOBQ	MOBV	MOBT	MOBB	F_traE	F_traH	F_traK	F_traL	F_traN	F_traU	F_traV	F_traW	F_trbC	G_ICEHIN1056_000310	G_ICEHIN1056_000410	G_ICEHIN1056_000440	G_ICEHIN1056_000510	G_ICEHIN1056_000520	I_traI	I_traK	I_traL	I_traM	I_traN	I_traP	I_traQ	I_traR	I_traW	I_traY
NC_008543	Burkholderia_cenocepacia_HI2424_chromosome_2,_complete_sequence._	Proteobacteria;	Betaproteobacteria	circular	2998664	2686	T4SS	CONJ	T	T4SS_T4CP_MOB_T_278	142	155	virb4@BUCC003c02_001430&0.816543&9.6e-216	traU	t4cp1@BUCC003c02_001510&1&5.5e-29	t4cp2@BUCC003c02_001510&0.995495&1.1e-60	t4cp3	MOBC	MOBF	MOBH	MOBPHEN@BUCC003c02_001550&0.871245&3.6e-25	MOBQ	MOBV	MOBT	MOBB	F_traE	F_traH	F_traK	F_traL	F_traN	F_traU	F_traV	F_traW	F_trbC	G_ICEHIN1056_000310	G_ICEHIN1056_000410	G_ICEHIN1056_000440	G_ICEHIN1056_000510	G_ICEHIN1056_000520	I_traI	I_traK	I_traL	I_traM	I_traN	I_traP	I_traQ	I_traR	I_traW	I_traY
NC_010508	Burkholderia_cenocepacia_MC0-3_chromosome_1,_complete_sequence._	Proteobacteria;	Betaproteobacteria	circular	3532883	3160	NOT4SS	MOB	O	NOT4SS_NOT4CP_MOB_O_279	779	779	virb4	traU	t4cp1	t4cp2	t4cp3	MOBC	MOBF	MOBH	MOBPHEN@BUCC004c01_007790&0.854077&3e-23	MOBQ	MOBV	MOBT	MOBB	F_traE	F_traH	F_traK	F_traL	F_traN	F_traU	F_traV	F_traW	F_trbC	G_ICEHIN1056_000310	G_ICEHIN1056_000410	G_ICEHIN1056_000440	G_ICEHIN1056_000510	G_ICEHIN1056_000520	I_traI	I_traK	I_traL	I_traM	I_traN	I_traP	I_traQ	I_traR	I_traW	I_traY
NC_010515	Burkholderia_cenocepacia_MC0-3_chromosome_2,_complete_sequence._	Proteobacteria;	Betaproteobacteria	circular	3213911	2795	T4SS	CONJ	T	T4SS_T4CP_MOB_T_280	1000	1013	virb4@BUCC004c03_010120&0.815483&5.3e-215	traU	t4cp1@BUCC004c03_010040&1&5.5e-29	t4cp2@BUCC004c03_010040&0.995495&1.2e-60	t4cp3	MOBC	MOBF	MOBH	MOBPHEN@BUCC004c03_010000&0.879828&6.1e-26	MOBQ	MOBV	MOBT	MOBB	F_traE	F_traH	F_traK	F_traL	F_traN	F_traU	F_traV	F_traW	F_trbC	G_ICEHIN1056_000310	G_ICEHIN1056_000410	G_ICEHIN1056_000440	G_ICEHIN1056_000510	G_ICEHIN1056_000520	I_traI	I_traK	I_traL	I_traM	I_traN	I_traP	I_traQ	I_traR	I_traW	I_traY
NC_008390	Burkholderia_ambifaria_AMMD_chromosome_1,_complete_genome._	Proteobacteria;	Betaproteobacteria	circular	3556545	3206	T4SS	CONJ	T	T4SS_T4CP_MOB_T_283	2029	2052	virb4@BUCE002c01_020470&0.823966&9.6e-182	traU	t4cp1@BUCE002c01_020420&1&9e-25	t4cp2@BUCE002c01_020420&1&2.5e-56	t4cp3	MOBC	MOBF	MOBH	MOBPHEN@BUCE002c01_020290&0.746781&4.9e-24	MOBQ	MOBV	MOBT	MOBB	F_traE	F_traH	F_traK	F_traL	F_traN	F_traU	F_traV	F_traW	F_trbC	G_ICEHIN1056_000310	G_ICEHIN1056_000410	G_ICEHIN1056_000440	G_ICEHIN1056_000510	G_ICEHIN1056_000520	I_traI	I_traK	I_traL	I_traM	I_traN	I_traP	I_traQ	I_traR	I_traW	I_traY
NC_011000	Burkholderia_cenocepacia_J2315_chromosome_1,_complete_genome._	Proteobacteria;	Betaproteobacteria	circular	3870082	3464	NOT4SS	MOB	O	NOT4SS_NOT4CP_MOB_O_286	958	958	virb4	traU	t4cp1	t4cp2	t4cp3	MOBC	MOBF	MOBH	MOBPHEN	MOBQ	MOBV@BUCE003c01_009580&0.980392&1.3e-27	MOBT	MOBB	F_traE	F_traH	F_traK	F_traL	F_traN	F_traU	F_traV	F_traW	F_trbC	G_ICEHIN1056_000310	G_ICEHIN1056_000410	G_ICEHIN1056_000440	G_ICEHIN1056_000510	G_ICEHIN1056_000520	I_traI	I_traK	I_traL	I_traM	I_traN	I_traP	I_traQ	I_traR	I_traW	I_traY
NC_011000	Burkholderia_cenocepacia_J2315_chromosome_1,_complete_genome._	Proteobacteria;	Betaproteobacteria	circular	3870082	3464	NOT4SS	MOB	O	NOT4SS_NOT4CP_MOB_O_287	2558	2564	virb4	traU	t4cp1	t4cp2	t4cp3	MOBC	MOBF	MOBH@BUCE003c01_025640&0.941176&4.5e-42	MOBPHEN	MOBQ	MOBV	MOBT	MOBB	F_traE	F_traH	F_traK	F_traL	F_traN	F_traU	F_traV	F_traW	F_trbC	G_ICEHIN1056_000310	G_ICEHIN1056_000410	G_ICEHIN1056_000440	G_ICEHIN1056_000510@BUCE003c01_025580&0.980306&1e-196	G_ICEHIN1056_000520	I_traI	I_traK	I_traL	I_traM	I_traN	I_traP	I_traQ	I_traR	I_traW	I_traY
NC_011000	Burkholderia_cenocepacia_J2315_chromosome_1,_complete_genome._	Proteobacteria;	Betaproteobacteria	circular	3870082	3464	NOT4SS	MOB	O	NOT4SS_NOT4CP_MOB_O_288	3227	3227	virb4	traU	t4cp1	t4cp2	t4cp3	MOBC	MOBF	MOBH	MOBPHEN@BUCE003c01_032270&0.862661&1.6e-24	MOBQ	MOBV	MOBT	MOBB	F_traE	F_traH	F_traK	F_traL	F_traN	F_traU	F_traV	F_traW	F_trbC	G_ICEHIN1056_000310	G_ICEHIN1056_000410	G_ICEHIN1056_000440	G_ICEHIN1056_000510	G_ICEHIN1056_000520	I_traI	I_traK	I_traL	I_traM	I_traN	I_traP	I_traQ	I_traR	I_traW	I_traY
NC_011001	Burkholderia_cenocepacia_J2315_chromosome_2,_complete_genome._	Proteobacteria;	Betaproteobacteria	circular	3217062	2807	T4SS	MOB	T	T4SS_NOT4CP_MOB_T_289	324	336	virb4@BUCE003c02_003250&0.816543&2.5e-215	traU	t4cp1	t4cp2	t4cp3	MOBC	MOBF	MOBH	MOBPHEN@BUCE003c02_003360&0.875536&2.9e-25	MOBQ	MOBV	MOBT	MOBB	F_traE	F_traH	F_traK	F_traL	F_traN	F_traU	F_traV	F_traW	F_trbC	G_ICEHIN1056_000310	G_ICEHIN1056_000410	G_ICEHIN1056_000440	G_ICEHIN1056_000510	G_ICEHIN1056_000520	I_traI	I_traK	I_traL	I_traM	I_traN	I_traP	I_traQ	I_traR	I_traW	I_traY
NC_012724	Burkholderia_glumae_BGR1_chromosome_1,_complete_genome._	Proteobacteria;	Betaproteobacteria	circular	3906529	3287	NOT4SS	MOB	O	NOT4SS_T4CP_MOB_O_292	2313	2314	virb4	traU	t4cp1@BUGL001c01_023140&0.981818&2.2e-05	t4cp2@BUGL001c01_023140&0.572072&4.4e-15	t4cp3	MOBC	MOBF@BUGL001c01_023130&0.911364&8.2e-120&0.0023&1.8e-10	MOBH	MOBPHEN	MOBQ	MOBV	MOBT	MOBB	F_traE	F_traH	F_traK	F_traL	F_traN	F_traU	F_traV	F_traW	F_trbC	G_ICEHIN1056_000310	G_ICEHIN1056_000410	G_ICEHIN1056_000440	G_ICEHIN1056_000510	G_ICEHIN1056_000520	I_traI	I_traK	I_traL	I_traM	I_traN	I_traP	I_traQ	I_traR	I_traW	I_traY
NC_010084	Burkholderia_multivorans_ATCC_17616_chromosome_1,_complete_sequence._	Proteobacteria;	Betaproteobacteria	circular	3448466	3146	NOT4SS	MOB	O	NOT4SS_NOT4CP_MOB_O_297	659	659	virb4	traU	t4cp1	t4cp2	t4cp3	MOBC	MOBF	MOBH	MOBPHEN	MOBQ	MOBV@BUMU001c01_006590&0.980392&1.3e-27	MOBT	MOBB	F_traE	F_traH	F_traK	F_traL	F_traN	F_traU	F_traV	F_traW	F_trbC	G_ICEHIN1056_000310	G_ICEHIN1056_000410	G_ICEHIN1056_000440	G_ICEHIN1056_000510	G_ICEHIN1056_000520	I_traI	I_traK	I_traL	I_traM	I_traN	I_traP	I_traQ	I_traR	I_traW	I_traY
NC_010084	Burkholderia_multivorans_ATCC_17616_chromosome_1,_complete_sequence._	Proteobacteria;	Betaproteobacteria	circular	3448466	3146	T4SS	CONJ	T	T4SS_T4CP_MOB_T_298	2377	2400	virb4@BUMU001c01_023950&0.823966&3.9e-182	traU	t4cp1@BUMU001c01_023900&1&1.9e-24	t4cp2@BUMU001c01_023900&1&8.5e-56	t4cp3	MOBC	MOBF	MOBH	MOBPHEN@BUMU001c01_023770&0.733906&1.5e-23	MOBQ	MOBV	MOBT	MOBB	F_traE	F_traH	F_traK	F_traL	F_traN	F_traU	F_traV	F_traW	F_trbC	G_ICEHIN1056_000310	G_ICEHIN1056_000410	G_ICEHIN1056_000440	G_ICEHIN1056_000510	G_ICEHIN1056_000520	I_traI	I_traK	I_traL	I_traM	I_traN	I_traP	I_traQ	I_traR	I_traW	I_traY
NC_010087	Burkholderia_multivorans_ATCC_17616_chromosome_3,_complete_sequence._	Proteobacteria;	Betaproteobacteria	circular	919806	823	T4SS	CONJ	T	T4SS_T4CP_MOB_T_299	227	295	virb4@BUMU001c03_002910&0.80912&6.3e-140	traU	t4cp1@BUMU001c03_002950&0.909091&3.4e-11	t4cp2@BUMU001c03_002950&0.990991&3.5e-39	t4cp3	MOBC	MOBF	MOBH@BUMU001c03_002940&0.95098&7.9e-55	MOBPHEN	MOBQ	MOBV	MOBT	MOBB	F_traE	F_traH	F_traK	F_traL	F_traN	F_traU	F_traV	F_traW	F_trbC	G_ICEHIN1056_000310	G_ICEHIN1056_000410	G_ICEHIN1056_000440	G_ICEHIN1056_000510	G_ICEHIN1056_000520	I_traI	I_traK	I_traL	I_traM	I_traN	I_traP	I_traQ	I_traR	I_traW	I_traY
NC_010804	Burkholderia_multivorans_ATCC_17616_chromosome_1,_complete_sequence._	Proteobacteria;	Betaproteobacteria	circular	3448421	3084	T4SS	CONJ	T	T4SS_T4CP_MOB_T_300	868	891	virb4@BUMU002c01_008730&0.823966&3.9e-182	traU	t4cp1@BUMU002c01_008780&1&1.9e-24	t4cp2@BUMU002c01_008780&1&8.5e-56	t4cp3	MOBC	MOBF	MOBH	MOBPHEN@BUMU002c01_008910&0.733906&1.5e-23	MOBQ	MOBV	MOBT	MOBB	F_traE	F_traH	F_traK	F_traL	F_traN	F_traU	F_traV	F_traW	F_trbC	G_ICEHIN1056_000310	G_ICEHIN1056_000410	G_ICEHIN1056_000440	G_ICEHIN1056_000510	G_ICEHIN1056_000520	I_traI	I_traK	I_traL	I_traM	I_traN	I_traP	I_traQ	I_traR	I_traW	I_traY
NC_010804	Burkholderia_multivorans_ATCC_17616_chromosome_1,_complete_sequence._	Proteobacteria;	Betaproteobacteria	circular	3448421	3084	NOT4SS	MOB	O	NOT4SS_NOT4CP_MOB_O_301	2575	2575	virb4	traU	t4cp1	t4cp2	t4cp3	MOBC	MOBF	MOBH	MOBPHEN	MOBQ	MOBV@BUMU002c01_025750&0.980392&1.3e-27	MOBT	MOBB	F_traE	F_traH	F_traK	F_traL	F_traN	F_traU	F_traV	F_traW	F_trbC	G_ICEHIN1056_000310	G_ICEHIN1056_000410	G_ICEHIN1056_000440	G_ICEHIN1056_000510	G_ICEHIN1056_000520	I_traI	I_traK	I_traL	I_traM	I_traN	I_traP	I_traQ	I_traR	I_traW	I_traY
NC_010801	Burkholderia_multivorans_ATCC_17616_chromosome_3,_complete_sequence._	Proteobacteria;	Betaproteobacteria	circular	919805	767	T4SS	CONJ	T	T4SS_T4CP_MOB_T_302	499	559	virb4@BUMU002c03_005030&0.80912&6.3e-140	traU	t4cp1@BUMU002c03_004990&0.909091&3.4e-11	t4cp2@BUMU002c03_004990&0.990991&3.5e-39	t4cp3	MOBC	MOBF	MOBH@BUMU002c03_005000&0.95098&7.9e-55	MOBPHEN	MOBQ	MOBV	MOBT	MOBB	F_traE	F_traH	F_traK	F_traL	F_traN	F_traU	F_traV	F_traW	F_trbC	G_ICEHIN1056_000310	G_ICEHIN1056_000410	G_ICEHIN1056_000440	G_ICEHIN1056_000510	G_ICEHIN1056_000520	I_traI	I_traK	I_traL	I_traM	I_traN	I_traP	I_traQ	I_traR	I_traW	I_traY
NC_010681	Burkholderia_phytofirmans_PsJN_chromosome_1,_complete_sequence._	Proteobacteria;	Betaproteobacteria	circular	4467537	3922	T4SS	CONJ	T	T4SS_T4CP_MOB_T_303	148	162	virb4@BUPH002c01_001490&0.821845&4.7e-215	traU	t4cp1@BUPH002c01_001580&0.990909&1.3e-28	t4cp2@BUPH002c01_001580&0.995495&9.4e-62	t4cp3	MOBC	MOBF	MOBH	MOBPHEN@BUPH002c01_001620&0.875536&1.3e-30	MOBQ	MOBV	MOBT	MOBB	F_traE	F_traH	F_traK	F_traL	F_traN	F_traU	F_traV	F_traW	F_trbC	G_ICEHIN1056_000310	G_ICEHIN1056_000410	G_ICEHIN1056_000440	G_ICEHIN1056_000510	G_ICEHIN1056_000520	I_traI	I_traK	I_traL	I_traM	I_traN	I_traP	I_traQ	I_traR	I_traW	I_traY
NC_010676	Burkholderia_phytofirmans_PsJN_chromosome_2,_complete_sequence._	Proteobacteria;	Betaproteobacteria	circular	3625999	3152	T4SS	CONJ	T	T4SS_T4CP_MOB_T_305	2433	2447	virb4@BUPH002c02_024460&0.821845&1.7e-213	traU	t4cp1@BUPH002c02_024370&0.990909&1.2e-29	t4cp2@BUPH002c02_024370&0.995495&1.5e-58	t4cp3	MOBC	MOBF	MOBH	MOBPHEN@BUPH002c02_024330&0.793991&4.5e-29	MOBQ	MOBV	MOBT	MOBB	F_traE	F_traH	F_traK	F_traL	F_traN	F_traU	F_traV	F_traW	F_trbC	G_ICEHIN1056_000310	G_ICEHIN1056_000410	G_ICEHIN1056_000440	G_ICEHIN1056_000510	G_ICEHIN1056_000520	I_traI	I_traK	I_traL	I_traM	I_traN	I_traP	I_traQ	I_traR	I_traW	I_traY
NC_006350	Burkholderia_pseudomallei_K96243_chromosome_1,_complete_sequence._	Proteobacteria;	Betaproteobacteria	circular	4074542	3399	NOT4SS	MOB	O	NOT4SS_NOT4CP_MOB_O_306	3292	3294	virb4	traU	t4cp1	t4cp2	t4cp3	MOBC	MOBF	MOBH	MOBPHEN@BUPS001c01_032940&0.974249&6e-50	MOBQ	MOBV	MOBT	MOBB	F_traE	F_traH	F_traK	F_traL	F_traN	F_traU	F_traV	F_traW	F_trbC	G_ICEHIN1056_000310	G_ICEHIN1056_000410	G_ICEHIN1056_000440	G_ICEHIN1056_000510	G_ICEHIN1056_000520	I_traI	I_traK	I_traL	I_traM	I_traN	I_traP	I_traQ	I_traR	I_traW	I_traY
NC_012695	Burkholderia_pseudomallei_MSHR346_chromosome_I,_complete_genome._	Proteobacteria;	Betaproteobacteria	linear	4098576	4202	T4SS	CONJ	T	T4SS_T4CP_MOB_T_311	959	976	virb4@BUPS005c01_009720&0.827147&1.3e-176	traU	t4cp1@BUPS005c01_009670&1&3.2e-25	t4cp2@BUPS005c01_009670&1&6.9e-53	t4cp3	MOBC	MOBF	MOBH	MOBPHEN@BUPS005c01_009590&0.635193&1.1e-23	MOBQ	MOBV	MOBT	MOBB	F_traE	F_traH	F_traK	F_traL	F_traN	F_traU	F_traV	F_traW	F_trbC	G_ICEHIN1056_000310	G_ICEHIN1056_000410	G_ICEHIN1056_000440	G_ICEHIN1056_000510	G_ICEHIN1056_000520	I_traI	I_traK	I_traL	I_traM	I_traN	I_traP	I_traQ	I_traR	I_traW	I_traY
NC_009256	Burkholderia_vietnamiensis_G4_chromosome_1,_complete_sequence._	Proteobacteria;	Betaproteobacteria	circular	3652814	3274	NOT4SS	MOB	O	NOT4SS_T4CP_MOB_O_312	2086	2087	virb4	traU	t4cp1@BUVI001c01_020870&0.981818&8.9e-10	t4cp2@BUVI001c01_020870&0.77027&1.5e-25	t4cp3	MOBC	MOBF@BUVI001c01_020860&1.0375&3.4e-110&4.2e-14	MOBH	MOBPHEN	MOBQ	MOBV	MOBT	MOBB	F_traE	F_traH	F_traK	F_traL	F_traN	F_traU	F_traV	F_traW	F_trbC	G_ICEHIN1056_000310	G_ICEHIN1056_000410	G_ICEHIN1056_000440	G_ICEHIN1056_000510	G_ICEHIN1056_000520	I_traI	I_traK	I_traL	I_traM	I_traN	I_traP	I_traQ	I_traR	I_traW	I_traY
NC_009256	Burkholderia_vietnamiensis_G4_chromosome_1,_complete_sequence._	Proteobacteria;	Betaproteobacteria	circular	3652814	3274	NOT4SS	MOB	O	NOT4SS_NOT4CP_MOB_O_313	2298	2298	virb4	traU	t4cp1	t4cp2	t4cp3	MOBC	MOBF	MOBH	MOBPHEN	MOBQ	MOBV@BUVI001c01_022980&0.97549&2.6e-29	MOBT	MOBB	F_traE	F_traH	F_traK	F_traL	F_traN	F_traU	F_traV	F_traW	F_trbC	G_ICEHIN1056_000310	G_ICEHIN1056_000410	G_ICEHIN1056_000440	G_ICEHIN1056_000510	G_ICEHIN1056_000520	I_traI	I_traK	I_traL	I_traM	I_traN	I_traP	I_traQ	I_traR	I_traW	I_traY
NC_009256	Burkholderia_vietnamiensis_G4_chromosome_1,_complete_sequence._	Proteobacteria;	Betaproteobacteria	circular	3652814	3274	NOT4SS	MOB	O	NOT4SS_T4CP_MOB_O_314	2703	2721	virb4	traU	t4cp1	t4cp2@BUVI001c01_027030&0.743243&6.9e-14	t4cp3	MOBC	MOBF	MOBH	MOBPHEN@BUVI001c01_027210&0.957082&1e-22	MOBQ	MOBV	MOBT	MOBB	F_traE	F_traH	F_traK	F_traL	F_traN	F_traU	F_traV	F_traW	F_trbC	G_ICEHIN1056_000310	G_ICEHIN1056_000410	G_ICEHIN1056_000440	G_ICEHIN1056_000510	G_ICEHIN1056_000520	I_traI	I_traK	I_traL	I_traM	I_traN	I_traP	I_traQ	I_traR	I_traW	I_traY@BUVI001c01_027140&0.926174&3.1e-63
NC_009256	Burkholderia_vietnamiensis_G4_chromosome_1,_complete_sequence._	Proteobacteria;	Betaproteobacteria	circular	3652814	3274	NOT4SS	MOB	O	NOT4SS_NOT4CP_MOB_O_315	2801	2801	virb4	traU	t4cp1	t4cp2	t4cp3	MOBC	MOBF	MOBH	MOBPHEN	MOBQ	MOBV@BUVI001c01_028010&0.980392&1.3e-27	MOBT	MOBB	F_traE	F_traH	F_traK	F_traL	F_traN	F_traU	F_traV	F_traW	F_trbC	G_ICEHIN1056_000310	G_ICEHIN1056_000410	G_ICEHIN1056_000440	G_ICEHIN1056_000510	G_ICEHIN1056_000520	I_traI	I_traK	I_traL	I_traM	I_traN	I_traP	I_traQ	I_traR	I_traW	I_traY
NC_009254	Burkholderia_vietnamiensis_G4_chromosome_3,_complete_sequence._	Proteobacteria;	Betaproteobacteria	circular	1241007	1114	T4SS	CONJ	T	T4SS_T4CP_MOB_T_316	323	336	virb4@BUVI001c03_003240&0.820785&6.4e-221	traU	t4cp1@BUVI001c03_003320&0.990909&7.5e-30	t4cp2@BUVI001c03_003320&0.995495&1.7e-56	t4cp3	MOBC	MOBF	MOBH	MOBPHEN@BUVI001c03_003360&0.871245&4.3e-29	MOBQ	MOBV	MOBT	MOBB	F_traE	F_traH	F_traK	F_traL	F_traN	F_traU	F_traV	F_traW	F_trbC	G_ICEHIN1056_000310	G_ICEHIN1056_000410	G_ICEHIN1056_000440	G_ICEHIN1056_000510	G_ICEHIN1056_000520	I_traI	I_traK	I_traL	I_traM	I_traN	I_traP	I_traQ	I_traR	I_traW	I_traY
NC_007951	Burkholderia_xenovorans_LB400_chromosome_1,_complete_sequence._	Proteobacteria;	Betaproteobacteria	circular	4895836	4430	NOT4SS	MOB	O	NOT4SS_NOT4CP_MOB_O_317	519	527	virb4	traU	t4cp1	t4cp2	t4cp3	MOBC	MOBF	MOBH	MOBPHEN@BUXE001c01_005270&0.95279&9.9e-34	MOBQ	MOBV	MOBT	MOBB	F_traE	F_traH	F_traK	F_traL	F_traN	F_traU	F_traV	F_traW	F_trbC	G_ICEHIN1056_000310	G_ICEHIN1056_000410	G_ICEHIN1056_000440	G_ICEHIN1056_000510	G_ICEHIN1056_000520	I_traI	I_traK	I_traL	I_traM	I_traN	I_traP	I_traQ	I_traR	I_traW	I_traY@BUXE001c01_005190&0.961074&3.5e-91
NC_007951	Burkholderia_xenovorans_LB400_chromosome_1,_complete_sequence._	Proteobacteria;	Betaproteobacteria	circular	4895836	4430	T4SS	CONJ	T	T4SS_T4CP_MOB_T_320	1779	1792	virb4@BUXE001c01_017800&0.822906&1.1e-221	traU	t4cp1@BUXE001c01_017880&0.990909&3e-30	t4cp2@BUXE001c01_017880&0.995495&2.3e-60	t4cp3	MOBC	MOBF	MOBH	MOBPHEN@BUXE001c01_017920&0.742489&6.3e-31	MOBQ	MOBV	MOBT	MOBB	F_traE	F_traH	F_traK	F_traL	F_traN	F_traU	F_traV	F_traW	F_trbC	G_ICEHIN1056_000310	G_ICEHIN1056_000410	G_ICEHIN1056_000440	G_ICEHIN1056_000510	G_ICEHIN1056_000520	I_traI	I_traK	I_traL	I_traM	I_traN	I_traP	I_traQ	I_traR	I_traW	I_traY
NC_007951	Burkholderia_xenovorans_LB400_chromosome_1,_complete_sequence._	Proteobacteria;	Betaproteobacteria	circular	4895836	4430	T4SS	CONJ	T	T4SS_T4CP_MOB_T_321	2674	2687	virb4@BUXE001c01_026860&0.828208&1.3e-225	traU	t4cp1@BUXE001c01_026780&0.990909&6.9e-30	t4cp2@BUXE001c01_026780&0.990991&2e-56	t4cp3	MOBC	MOBF	MOBH	MOBPHEN@BUXE001c01_026740&0.738197&3.8e-30	MOBQ	MOBV	MOBT	MOBB	F_traE	F_traH	F_traK	F_traL	F_traN	F_traU	F_traV	F_traW	F_trbC	G_ICEHIN1056_000310	G_ICEHIN1056_000410	G_ICEHIN1056_000440	G_ICEHIN1056_000510	G_ICEHIN1056_000520	I_traI	I_traK	I_traL	I_traM	I_traN	I_traP	I_traQ	I_traR	I_traW	I_traY
NC_007951	Burkholderia_xenovorans_LB400_chromosome_1,_complete_sequence._	Proteobacteria;	Betaproteobacteria	circular	4895836	4430	T4SS	CONJ	G	T4SS_T4CP_MOB_G_322	3254	3281	virb4@BUXE001c01_032700&0.818664&7.5e-92	traU	t4cp1@BUXE001c01_032590&0.990909&1.2e-10	t4cp2@BUXE001c01_032590&0.972973&8.4e-31	t4cp3	MOBC	MOBF	MOBH@BUXE001c01_032810&0.877451&2.2e-42	MOBPHEN	MOBQ	MOBV	MOBT	MOBB	F_traE@BUXE001c01_032660&0.569948&0.00023	F_traH	F_traK	F_traL	F_traN	F_traU	F_traV	F_traW	F_trbC	G_ICEHIN1056_000310@BUXE001c01_032540&0.970297&1e-75	G_ICEHIN1056_000410@BUXE001c01_032660&0.959276&2.5e-109	G_ICEHIN1056_000440@BUXE001c01_032690&0.978261&4.7e-65	G_ICEHIN1056_000510@BUXE001c01_032750&0.984683&3.1e-205	G_ICEHIN1056_000520@BUXE001c01_032740&0.993958&1.1e-152	I_traI	I_traK	I_traL	I_traM	I_traN	I_traP	I_traQ	I_traR	I_traW	I_traY
NC_007953	Burkholderia_xenovorans_LB400_chromosome_3,_complete_genome._	Proteobacteria;	Betaproteobacteria	circular	1471779	1312	T4SS	CONJ	T	T4SS_T4CP_MOB_T_323	425	438	virb4@BUXE001c03_004260&0.827147&5e-217	traU	t4cp1@BUXE001c03_004340&0.990909&4.5e-29	t4cp2@BUXE001c03_004340&0.995495&1.5e-61	t4cp3	MOBC	MOBF	MOBH	MOBPHEN@BUXE001c03_004380&0.871245&1.6e-30	MOBQ	MOBV	MOBT	MOBB	F_traE	F_traH	F_traK	F_traL	F_traN	F_traU	F_traV	F_traW	F_trbC	G_ICEHIN1056_000310	G_ICEHIN1056_000410	G_ICEHIN1056_000440	G_ICEHIN1056_000510	G_ICEHIN1056_000520	I_traI	I_traK	I_traL	I_traM	I_traN	I_traP	I_traQ	I_traR	I_traW	I_traY
NC_013131	Catenulispora_acidiphila_DSM_44928,_complete_genome._	Actinobacteria;	Actinobacteria	circular	10467782	8914	T4SS	NOMOB	O	T4SS_T4CP_NOMOB_O_325	4017	4018	virb4@CAAC001c01_040180&0.557794&8.1e-92	traU	t4cp1@CAAC001c01_040170&0.872727&2.2e-05	t4cp2@CAAC001c01_040170&0.585586&2.1e-14	t4cp3	MOBC	MOBF	MOBH	MOBPHEN	MOBQ	MOBV	MOBT	MOBB	F_traE	F_traH	F_traK	F_traL	F_traN	F_traU	F_traV	F_traW	F_trbC	G_ICEHIN1056_000310	G_ICEHIN1056_000410	G_ICEHIN1056_000440	G_ICEHIN1056_000510	G_ICEHIN1056_000520	I_traI	I_traK	I_traL	I_traM	I_traN	I_traP	I_traQ	I_traR	I_traW	I_traY
NC_013131	Catenulispora_acidiphila_DSM_44928,_complete_genome._	Actinobacteria;	Actinobacteria	circular	10467782	8914	T4SS	NOMOB	O	T4SS_T4CP_NOMOB_O_326	6773	6776	virb4@CAAC001c01_067750&0.577943&3.3e-85	traU	t4cp1@CAAC001c01_067760&0.981818&1.9e-05	t4cp2@CAAC001c01_067760&0.617117&6.1e-11	t4cp3	MOBC	MOBF	MOBH	MOBPHEN	MOBQ	MOBV	MOBT	MOBB	F_traE	F_traH	F_traK	F_traL	F_traN	F_traU	F_traV	F_traW	F_trbC	G_ICEHIN1056_000310	G_ICEHIN1056_000410	G_ICEHIN1056_000440	G_ICEHIN1056_000510	G_ICEHIN1056_000520	I_traI	I_traK	I_traL	I_traM	I_traN	I_traP	I_traQ	I_traR	I_traW	I_traY
NC_013131	Catenulispora_acidiphila_DSM_44928,_complete_genome._	Actinobacteria;	Actinobacteria	circular	10467782	8914	T4SS	NOMOB	O	T4SS_T4CP_NOMOB_O_329	8499	8500	virb4@CAAC001c01_084990&0.574761&2.1e-78	traU	t4cp1@CAAC001c01_085000&0.918182&0.0001	t4cp2@CAAC001c01_085000&0.603604&5e-11	t4cp3	MOBC	MOBF	MOBH	MOBPHEN	MOBQ	MOBV	MOBT	MOBB	F_traE	F_traH	F_traK	F_traL	F_traN	F_traU	F_traV	F_traW	F_trbC	G_ICEHIN1056_000310	G_ICEHIN1056_000410	G_ICEHIN1056_000440	G_ICEHIN1056_000510	G_ICEHIN1056_000520	I_traI	I_traK	I_traL	I_traM	I_traN	I_traP	I_traQ	I_traR	I_traW	I_traY
NC_013131	Catenulispora_acidiphila_DSM_44928,_complete_genome._	Actinobacteria;	Actinobacteria	circular	10467782	8914	NOT4SS	MOB	O	NOT4SS_T4CP_MOB_O_330	8867	8900	virb4	traU	t4cp1@CAAC001c01_088670&0.981818&4e-09	t4cp2@CAAC001c01_088670&0.887387&3.5e-29	t4cp3	MOBC	MOBF@CAAC001c01_089000&0.996591&1.7e-173	MOBH	MOBPHEN	MOBQ	MOBV	MOBT	MOBB	F_traE	F_traH	F_traK	F_traL	F_traN	F_traU	F_traV	F_traW	F_trbC	G_ICEHIN1056_000310	G_ICEHIN1056_000410	G_ICEHIN1056_000440	G_ICEHIN1056_000510	G_ICEHIN1056_000520	I_traI	I_traK	I_traL	I_traM	I_traN	I_traP	I_traQ	I_traR	I_traW	I_traY
NC_009802	Campylobacter_concisus_13826,_complete_genome._	Proteobacteria;	Epsilonproteobacteria	circular	2052007	1929	NOT4SS	MOB	O	NOT4SS_NOT4CP_MOB_O_331	362	362	virb4	traU	t4cp1	t4cp2	t4cp3	MOBC	MOBF	MOBH	MOBPHEN@CACO001c01_003620&0.811159&1.8e-08	MOBQ	MOBV	MOBT	MOBB	F_traE	F_traH	F_traK	F_traL	F_traN	F_traU	F_traV	F_traW	F_trbC	G_ICEHIN1056_000310	G_ICEHIN1056_000410	G_ICEHIN1056_000440	G_ICEHIN1056_000510	G_ICEHIN1056_000520	I_traI	I_traK	I_traL	I_traM	I_traN	I_traP	I_traQ	I_traR	I_traW	I_traY
NC_002696	Caulobacter_crescentus_CB15,_complete_genome._	Proteobacteria;	Alphaproteobacteria	circular	4016947	3737	T4SS	NOMOB	T	T4SS_NOT4CP_NOMOB_T_333	2439	2442	virb4@CACR001c01_024400&0.80912&7.9e-212	traU	t4cp1	t4cp2	t4cp3	MOBC	MOBF	MOBH	MOBPHEN	MOBQ	MOBV	MOBT	MOBB	F_traE	F_traH	F_traK	F_traL	F_traN	F_traU	F_traV	F_traW	F_trbC	G_ICEHIN1056_000310	G_ICEHIN1056_000410	G_ICEHIN1056_000440	G_ICEHIN1056_000510	G_ICEHIN1056_000520	I_traI	I_traK	I_traL	I_traM	I_traN	I_traP	I_traQ	I_traR	I_traW	I_traY
NC_011916	Caulobacter_crescentus_NA1000,_complete_genome._	Proteobacteria;	Alphaproteobacteria	circular	4042929	3876	NOT4SS	MOB	O	NOT4SS_T4CP_MOB_O_336	474	475	virb4	traU	t4cp1@CACR002c01_004750&0.990909&3.1e-13	t4cp2@CACR002c01_004750&0.833333&1.3e-29	t4cp3	MOBC	MOBF@CACR002c01_004740&0.997727&2.4e-214	MOBH	MOBPHEN	MOBQ	MOBV	MOBT	MOBB	F_traE	F_traH	F_traK	F_traL	F_traN	F_traU	F_traV	F_traW	F_trbC	G_ICEHIN1056_000310	G_ICEHIN1056_000410	G_ICEHIN1056_000440	G_ICEHIN1056_000510	G_ICEHIN1056_000520	I_traI	I_traK	I_traL	I_traM	I_traN	I_traP	I_traQ	I_traR	I_traW	I_traY
NC_011916	Caulobacter_crescentus_NA1000,_complete_genome._	Proteobacteria;	Alphaproteobacteria	circular	4042929	3876	T4SS	NOMOB	T	T4SS_NOT4CP_NOMOB_T_337	2535	2538	virb4@CACR002c01_025360&0.80912&7.9e-212	traU	t4cp1	t4cp2	t4cp3	MOBC	MOBF	MOBH	MOBPHEN	MOBQ	MOBV	MOBT	MOBB	F_traE	F_traH	F_traK	F_traL	F_traN	F_traU	F_traV	F_traW	F_trbC	G_ICEHIN1056_000310	G_ICEHIN1056_000410	G_ICEHIN1056_000440	G_ICEHIN1056_000510	G_ICEHIN1056_000520	I_traI	I_traK	I_traL	I_traM	I_traN	I_traP	I_traQ	I_traR	I_traW	I_traY
NC_009714	Campylobacter_hominis_ATCC_BAA-381,_complete_genome._	Proteobacteria;	Epsilonproteobacteria	circular	1711273	1682	T4SS	CONJ	T	T4SS_T4CP_MOB_T_340	141	171	virb4@CAHO001c01_001710&0.539767&2.1e-147	traU	t4cp1@CAHO001c01_001610&0.990909&2e-24	t4cp2@CAHO001c01_001610&0.995495&1.9e-50	t4cp3	MOBC	MOBF	MOBH	MOBPHEN@CAHO001c01_001420&0.678112&1e-24@CAHO001c01_001410&0.729614&4.8e-13	MOBQ	MOBV@CAHO001c01_001420&0.676471&5.1e-08	MOBT	MOBB	F_traE	F_traH	F_traK	F_traL	F_traN	F_traU	F_traV	F_traW	F_trbC	G_ICEHIN1056_000310	G_ICEHIN1056_000410	G_ICEHIN1056_000440	G_ICEHIN1056_000510	G_ICEHIN1056_000520	I_traI	I_traK	I_traL	I_traM	I_traN	I_traP	I_traQ	I_traR	I_traW	I_traY
NC_009707	Campylobacter_jejuni_subsp._doylei_269.97,_complete_genome._	Proteobacteria;	Epsilonproteobacteria	circular	1845106	1731	T4SS	NOMOB	F	T4SS_T4CP_NOMOB_F_343_O_342	701	824	virb4@CAJE004c01_007900&0.644751&2.5e-94	traU	t4cp1@CAJE004c01_007010&0.981818&5.7e-09	t4cp2@CAJE004c01_007010&0.923423&3.1e-20	t4cp3	MOBC	MOBF	MOBH	MOBPHEN	MOBQ	MOBV	MOBT	MOBB	F_traE@CAJE004c01_007840&0.979275&4.2e-32	F_traH@CAJE004c01_007920&0.91757&5.1e-52	F_traK@CAJE004c01_007850&0.546763&1.9e-14	F_traL@CAJE004c01_007830&0.91&9.5e-15	F_traN	F_traU	F_traV	F_traW@CAJE004c01_008240&0.84434&2.1e-35	F_trbC@CAJE004c01_008210&0.751092&5e-22	G_ICEHIN1056_000310	G_ICEHIN1056_000410	G_ICEHIN1056_000440	G_ICEHIN1056_000510	G_ICEHIN1056_000520	I_traI	I_traK	I_traL	I_traM	I_traN	I_traP	I_traQ	I_traR	I_traW	I_traY
NC_010338	Caulobacter_sp._K31,_complete_genome._	Proteobacteria;	Alphaproteobacteria	circular	5477872	5061	NOT4SS	MOB	O	NOT4SS_NOT4CP_MOB_O_345	327	327	virb4	traU	t4cp1	t4cp2	t4cp3	MOBC	MOBF@CAK3001c01_003270&0.6125&4.6e-72&2.5e-23	MOBH	MOBPHEN	MOBQ@CAK3001c01_003270&0.995392&1.6e-79	MOBV	MOBT	MOBB	F_traE	F_traH	F_traK	F_traL	F_traN	F_traU	F_traV	F_traW	F_trbC	G_ICEHIN1056_000310	G_ICEHIN1056_000410	G_ICEHIN1056_000440	G_ICEHIN1056_000510	G_ICEHIN1056_000520	I_traI	I_traK	I_traL	I_traM	I_traN	I_traP	I_traQ	I_traR	I_traW	I_traY
NC_010338	Caulobacter_sp._K31,_complete_genome._	Proteobacteria;	Alphaproteobacteria	circular	5477872	5061	NOT4SS	MOB	O	NOT4SS_NOT4CP_MOB_O_347	1151	1151	virb4	traU	t4cp1	t4cp2	t4cp3	MOBC	MOBF@CAK3001c01_011510&0.611364&1.5e-71&1.3e-23	MOBH	MOBPHEN	MOBQ@CAK3001c01_011510&0.995392&1.4e-79	MOBV	MOBT	MOBB	F_traE	F_traH	F_traK	F_traL	F_traN	F_traU	F_traV	F_traW	F_trbC	G_ICEHIN1056_000310	G_ICEHIN1056_000410	G_ICEHIN1056_000440	G_ICEHIN1056_000510	G_ICEHIN1056_000520	I_traI	I_traK	I_traL	I_traM	I_traN	I_traP	I_traQ	I_traR	I_traW	I_traY
NC_010338	Caulobacter_sp._K31,_complete_genome._	Proteobacteria;	Alphaproteobacteria	circular	5477872	5061	T4SS	CONJ	T	T4SS_T4CP_MOB_T_348	2023	2040	virb4@CAK3001c01_020360&0.818664&2.5e-172	traU	t4cp1@CAK3001c01_020310&1&2.3e-24	t4cp2@CAK3001c01_020310&1&5.7e-59	t4cp3	MOBC	MOBF	MOBH	MOBPHEN@CAK3001c01_020230&0.678112&2.2e-21	MOBQ	MOBV	MOBT	MOBB	F_traE	F_traH	F_traK	F_traL	F_traN	F_traU	F_traV	F_traW	F_trbC	G_ICEHIN1056_000310	G_ICEHIN1056_000410	G_ICEHIN1056_000440	G_ICEHIN1056_000510	G_ICEHIN1056_000520	I_traI	I_traK	I_traL	I_traM	I_traN	I_traP	I_traQ	I_traR	I_traW	I_traY
NC_010338	Caulobacter_sp._K31,_complete_genome._	Proteobacteria;	Alphaproteobacteria	circular	5477872	5061	T4SS	CONJ	T	T4SS_T4CP_MOB_T_349	2215	2283	virb4@CAK3001c01_022790&0.821845&2.9e-166	traU	t4cp1@CAK3001c01_022640&1&2.5e-23	t4cp2@CAK3001c01_022640&1&1.5e-57	t4cp3	MOBC	MOBF	MOBH	MOBPHEN@CAK3001c01_022600&0.712446&1e-21	MOBQ	MOBV	MOBT	MOBB	F_traE	F_traH	F_traK	F_traL	F_traN	F_traU	F_traV	F_traW	F_trbC	G_ICEHIN1056_000310	G_ICEHIN1056_000410	G_ICEHIN1056_000440	G_ICEHIN1056_000510	G_ICEHIN1056_000520	I_traI	I_traK@CAK3001c01_022150&0.62069&0.00024	I_traL	I_traM	I_traN	I_traP	I_traQ	I_traR	I_traW	I_traY
NC_010338	Caulobacter_sp._K31,_complete_genome._	Proteobacteria;	Alphaproteobacteria	circular	5477872	5061	T4SS	CONJ	T	T4SS_T4CP_MOB_T_350	3863	3874	virb4@CAK3001c01_038690&0.819724&3.1e-172	traU	t4cp1@CAK3001c01_038640&1&1e-25	t4cp2@CAK3001c01_038640&1&5.6e-54	t4cp3	MOBC	MOBF	MOBH	MOBPHEN@CAK3001c01_038630&0.862661&1.1e-28	MOBQ	MOBV	MOBT	MOBB	F_traE	F_traH	F_traK	F_traL	F_traN	F_traU	F_traV	F_traW	F_trbC	G_ICEHIN1056_000310	G_ICEHIN1056_000410	G_ICEHIN1056_000440	G_ICEHIN1056_000510	G_ICEHIN1056_000520	I_traI	I_traK	I_traL	I_traM	I_traN	I_traP	I_traQ	I_traR	I_traW	I_traY
NC_009437	Caldicellulosiruptor_saccharolyticus_DSM_8903,_complete_genome._	Firmicutes;	Firmicutes	circular	2970275	2679	T4SS	NOMOB	O	T4SS_T4CP_NOMOB_O_352	1349	1364	virb4@CASA001c01_013490&0.539767&1e-101	traU	t4cp1@CASA001c01_013640&0.990909&5.8e-21	t4cp2@CASA001c01_013640&0.972973&9.6e-42	t4cp3	MOBC	MOBF	MOBH	MOBPHEN	MOBQ	MOBV	MOBT	MOBB	F_traE	F_traH	F_traK	F_traL	F_traN	F_traU	F_traV	F_traW	F_trbC	G_ICEHIN1056_000310	G_ICEHIN1056_000410	G_ICEHIN1056_000440	G_ICEHIN1056_000510	G_ICEHIN1056_000520	I_traI	I_traK	I_traL	I_traM	I_traN	I_traP	I_traQ	I_traR	I_traW	I_traY
NC_009437	Caldicellulosiruptor_saccharolyticus_DSM_8903,_complete_genome._	Firmicutes;	Firmicutes	circular	2970275	2679	T4SS	NOMOB	O	T4SS_T4CP_NOMOB_O_353	2609	2620	virb4@CASA001c01_026200&0.544008&5.1e-104	traU	t4cp1@CASA001c01_026090&1&4.2e-20	t4cp2@CASA001c01_026090&0.972973&8.7e-42	t4cp3	MOBC	MOBF	MOBH	MOBPHEN	MOBQ	MOBV	MOBT	MOBB	F_traE	F_traH	F_traK	F_traL	F_traN	F_traU	F_traV	F_traW	F_trbC	G_ICEHIN1056_000310	G_ICEHIN1056_000410	G_ICEHIN1056_000440	G_ICEHIN1056_000510	G_ICEHIN1056_000520	I_traI	I_traK	I_traL	I_traM	I_traN	I_traP	I_traQ	I_traR	I_traW	I_traY
NC_014100	Caulobacter_segnis_ATCC_21756_chromosome,_complete_genome._	Proteobacteria;	Alphaproteobacteria	circular	4655622	4139	T4SS	CONJ	T	T4SS_T4CP_MOB_T_355	2451	2508	virb4@CASE001c01_024560&0.828208&3.6e-166	traU	t4cp1@CASE001c01_025070&1&1.6e-23	t4cp2@CASE001c01_025070&1&1.1e-54	t4cp3	MOBC	MOBF	MOBH	MOBPHEN@CASE001c01_025080&0.879828&5.3e-23	MOBQ	MOBV	MOBT	MOBB	F_traE	F_traH	F_traK	F_traL	F_traN	F_traU	F_traV	F_traW	F_trbC	G_ICEHIN1056_000310	G_ICEHIN1056_000410	G_ICEHIN1056_000440	G_ICEHIN1056_000510	G_ICEHIN1056_000520	I_traI	I_traK	I_traL	I_traM	I_traN	I_traP	I_traQ	I_traR	I_traW	I_traY
NC_010995	Cellvibrio_japonicus_Ueda107,_complete_genome._	Proteobacteria;	Gammaproteobacteria	circular	4576573	3754	NOT4SS	MOB	O	NOT4SS_T4CP_MOB_O_357	1205	1230	virb4	traU	t4cp1@CEJA001c01_012300&0.818182&1.6e-08	t4cp2@CEJA001c01_012300&1&2.8e-39	t4cp3	MOBC	MOBF	MOBH	MOBPHEN@CEJA001c01_012050&0.759657&3.7e-18	MOBQ	MOBV	MOBT	MOBB	F_traE	F_traH	F_traK	F_traL	F_traN	F_traU	F_traV	F_traW	F_trbC	G_ICEHIN1056_000310	G_ICEHIN1056_000410	G_ICEHIN1056_000440	G_ICEHIN1056_000510	G_ICEHIN1056_000520	I_traI	I_traK	I_traL	I_traM	I_traN	I_traP	I_traQ	I_traR	I_traW	I_traY
NC_010831	Chlorobium_phaeobacteroides_BS1,_complete_genome._	Chlorobi;	Chlorobi	circular	2736403	2469	NOT4SS	MOB	O	NOT4SS_T4CP_MOB_O_361	677	678	virb4	traU	t4cp1@CHPH002c01_006780&1&1.5e-25	t4cp2@CHPH002c01_006780&1&2.5e-54	t4cp3	MOBC	MOBF	MOBH	MOBPHEN@CHPH002c01_006770&0.60515&5.3e-19	MOBQ	MOBV	MOBT	MOBB	F_traE	F_traH	F_traK	F_traL	F_traN	F_traU	F_traV	F_traW	F_trbC	G_ICEHIN1056_000310	G_ICEHIN1056_000410	G_ICEHIN1056_000440	G_ICEHIN1056_000510	G_ICEHIN1056_000520	I_traI	I_traK	I_traL	I_traM	I_traN	I_traP	I_traQ	I_traR	I_traW	I_traY
NC_013132	Chitinophaga_pinensis_DSM_2588,_complete_genome._	Bacteroidetes;	Bacteroidetes	circular	9127347	7192	NOT4SS	MOB	O	NOT4SS_T4CP_MOB_O_362	6305	6314	virb4	traU	t4cp1@CHPI001c01_063070&0.990909&1.9e-17	t4cp2@CHPI001c01_063070&0.891892&1.5e-28	t4cp3	MOBC	MOBF@CHPI001c01_063140&0.998864&9.9e-158	MOBH	MOBPHEN@CHPI001c01_063050&0.686695&5.5e-17	MOBQ	MOBV	MOBT	MOBB	F_traE	F_traH	F_traK	F_traL	F_traN	F_traU	F_traV	F_traW	F_trbC	G_ICEHIN1056_000310	G_ICEHIN1056_000410	G_ICEHIN1056_000440	G_ICEHIN1056_000510	G_ICEHIN1056_000520	I_traI	I_traK	I_traL	I_traM	I_traN	I_traP	I_traQ	I_traR	I_traW	I_traY
NC_009792	Citrobacter_koseri_ATCC_BAA-895,_complete_genome._	Proteobacteria;	Gammaproteobacteria	circular	4720462	4980	T4SS	CONJ	T	T4SS_T4CP_MOB_T_373	872	889	virb4@CIKO001c01_008890&0.879109&7.6e-228	traU	t4cp1@CIKO001c01_008730&0.909091&1.8e-08	t4cp2@CIKO001c01_008730&0.887387&5.4e-25	t4cp3	MOBC@CIKO001c01_008720&1&1.3e-72	MOBF	MOBH	MOBPHEN	MOBQ	MOBV	MOBT	MOBB	F_traE	F_traH	F_traK	F_traL	F_traN	F_traU	F_traV	F_traW	F_trbC	G_ICEHIN1056_000310	G_ICEHIN1056_000410	G_ICEHIN1056_000440	G_ICEHIN1056_000510	G_ICEHIN1056_000520	I_traI	I_traK	I_traL	I_traM	I_traN	I_traP	I_traQ	I_traR	I_traW	I_traY
NC_009792	Citrobacter_koseri_ATCC_BAA-895,_complete_genome._	Proteobacteria;	Gammaproteobacteria	circular	4720462	4980	NOT4SS	MOB	O	NOT4SS_T4CP_MOB_O_374	3453	3500	virb4	traU	t4cp1	t4cp2@CIKO001c01_035000&0.522523&6e-07	t4cp3	MOBC	MOBF	MOBH@CIKO001c01_034660&0.980392&1.4e-47	MOBPHEN@CIKO001c01_034820&0.716738&6.1e-23	MOBQ	MOBV	MOBT	MOBB	F_traE	F_traH	F_traK	F_traL	F_traN	F_traU	F_traV	F_traW	F_trbC	G_ICEHIN1056_000310	G_ICEHIN1056_000410	G_ICEHIN1056_000440	G_ICEHIN1056_000510@CIKO001c01_034540&0.958425&2.8e-181	G_ICEHIN1056_000520@CIKO001c01_034530&0.640483&3.6e-95	I_traI	I_traK	I_traL	I_traM	I_traN	I_traP	I_traQ	I_traR	I_traW	I_traY
NC_009792	Citrobacter_koseri_ATCC_BAA-895,_complete_genome._	Proteobacteria;	Gammaproteobacteria	circular	4720462	4980	NOT4SS	MOB	O	NOT4SS_NOT4CP_MOB_O_375	3918	3918	virb4	traU	t4cp1	t4cp2	t4cp3	MOBC	MOBF	MOBH	MOBPHEN@CIKO001c01_039180&0.875536&2.1e-29	MOBQ	MOBV	MOBT	MOBB	F_traE	F_traH	F_traK	F_traL	F_traN	F_traU	F_traV	F_traW	F_trbC	G_ICEHIN1056_000310	G_ICEHIN1056_000410	G_ICEHIN1056_000440	G_ICEHIN1056_000510	G_ICEHIN1056_000520	I_traI	I_traK	I_traL	I_traM	I_traN	I_traP	I_traQ	I_traR	I_traW	I_traY
NC_013716	Citrobacter_rodentium_ICC168,_complete_genome._	Proteobacteria;	Gammaproteobacteria	circular	5346659	4800	NOT4SS	MOB	O	NOT4SS_NOT4CP_MOB_O_377	1990	1990	virb4	traU	t4cp1	t4cp2	t4cp3	MOBC	MOBF	MOBH	MOBPHEN	MOBQ@CIRO001c01_019900&0.990783&1.2e-64	MOBV	MOBT	MOBB	F_traE	F_traH	F_traK	F_traL	F_traN	F_traU	F_traV	F_traW	F_trbC	G_ICEHIN1056_000310	G_ICEHIN1056_000410	G_ICEHIN1056_000440	G_ICEHIN1056_000510	G_ICEHIN1056_000520	I_traI	I_traK	I_traL	I_traM	I_traN	I_traP	I_traQ	I_traR	I_traW	I_traY
NC_013716	Citrobacter_rodentium_ICC168,_complete_genome._	Proteobacteria;	Gammaproteobacteria	circular	5346659	4800	NOT4SS	MOB	O	NOT4SS_T4CP_MOB_O_380	3227	3230	virb4	traU	t4cp1	t4cp2@CIRO001c01_032270&0.522523&1.2e-05	t4cp3	MOBC	MOBF	MOBH@CIRO001c01_032300&0.980392&1.8e-46	MOBPHEN	MOBQ	MOBV	MOBT	MOBB	F_traE	F_traH	F_traK	F_traL	F_traN	F_traU	F_traV	F_traW	F_trbC	G_ICEHIN1056_000310	G_ICEHIN1056_000410	G_ICEHIN1056_000440	G_ICEHIN1056_000510	G_ICEHIN1056_000520	I_traI	I_traK	I_traL	I_traM	I_traN	I_traP	I_traQ	I_traR	I_traW	I_traY
NC_003030	Clostridium_acetobutylicum_ATCC_824,_complete_genome._	Firmicutes;	Firmicutes	circular	3940880	3672	NOT4SS	MOB	O	NOT4SS_NOT4CP_MOB_O_381	1178	1178	virb4	traU	t4cp1	t4cp2	t4cp3	MOBC	MOBF@CLAC001c01_011780&0.526136&2.5e-37	MOBH	MOBPHEN	MOBQ	MOBV	MOBT	MOBB	F_traE	F_traH	F_traK	F_traL	F_traN	F_traU	F_traV	F_traW	F_trbC	G_ICEHIN1056_000310	G_ICEHIN1056_000410	G_ICEHIN1056_000440	G_ICEHIN1056_000510	G_ICEHIN1056_000520	I_traI	I_traK	I_traL	I_traM	I_traN	I_traP	I_traQ	I_traR	I_traW	I_traY
NC_003030	Clostridium_acetobutylicum_ATCC_824,_complete_genome._	Firmicutes;	Firmicutes	circular	3940880	3672	T4SS	NOMOB	O	T4SS_T4CP_NOMOB_O_383_O_382	1991	2068	virb4@CLAC001c01_020680&0.54825&8.1e-80	traU	t4cp1@CLAC001c01_019910&0.981818&1.6e-21	t4cp2@CLAC001c01_019910&0.972973&7.9e-44	t4cp3	MOBC	MOBF	MOBH	MOBPHEN	MOBQ	MOBV	MOBT	MOBB	F_traE	F_traH	F_traK	F_traL	F_traN	F_traU	F_traV	F_traW	F_trbC	G_ICEHIN1056_000310	G_ICEHIN1056_000410	G_ICEHIN1056_000440	G_ICEHIN1056_000510	G_ICEHIN1056_000520	I_traI	I_traK	I_traL	I_traM	I_traN	I_traP	I_traQ	I_traR	I_traW	I_traY
NC_010516	Clostridium_botulinum_B1_str._Okra,_complete_genome._	Firmicutes;	Firmicutes	circular	3958233	3657	NOT4SS	MOB	O	NOT4SS_T4CP_MOB_O_387	2511	2513	virb4	traU	t4cp1@CLBO001c01_025130&0.990909&1.8e-21	t4cp2@CLBO001c01_025130&0.990991&9.9e-42	t4cp3	MOBC	MOBF	MOBH	MOBPHEN	MOBQ	MOBV@CLBO001c01_025110&0.965686&1.9e-38	MOBT	MOBB	F_traE	F_traH	F_traK	F_traL	F_traN	F_traU	F_traV	F_traW	F_trbC	G_ICEHIN1056_000310	G_ICEHIN1056_000410	G_ICEHIN1056_000440	G_ICEHIN1056_000510	G_ICEHIN1056_000520	I_traI	I_traK	I_traL	I_traM	I_traN	I_traP	I_traQ	I_traR	I_traW	I_traY
NC_009697	Clostridium_botulinum_A_str._ATCC_19397,_complete_genome._	Firmicutes;	Firmicutes	circular	3863450	3552	NOT4SS	MOB	O	NOT4SS_T4CP_MOB_O_394	2359	2360	virb4	traU	t4cp1@CLBO006c01_023600&0.990909&2.4e-21	t4cp2@CLBO006c01_023600&0.990991&2.3e-42	t4cp3	MOBC	MOBF	MOBH	MOBPHEN	MOBQ	MOBV@CLBO006c01_023590&0.965686&8e-39	MOBT	MOBB	F_traE	F_traH	F_traK	F_traL	F_traN	F_traU	F_traV	F_traW	F_trbC	G_ICEHIN1056_000310	G_ICEHIN1056_000410	G_ICEHIN1056_000440	G_ICEHIN1056_000510	G_ICEHIN1056_000520	I_traI	I_traK	I_traL	I_traM	I_traN	I_traP	I_traQ	I_traR	I_traW	I_traY
NC_009699	Clostridium_botulinum_F_str._Langeland,_complete_genome._	Firmicutes;	Firmicutes	circular	3995387	3635	NOT4SS	MOB	O	NOT4SS_T4CP_MOB_O_397	3158	3159	virb4	traU	t4cp1@CLBO007c01_031590&0.990909&1.1e-19	t4cp2@CLBO007c01_031590&0.995495&3.9e-44	t4cp3	MOBC	MOBF	MOBH	MOBPHEN	MOBQ	MOBV@CLBO007c01_031580&0.960784&1.1e-38	MOBT	MOBB	F_traE	F_traH	F_traK	F_traL	F_traN	F_traU	F_traV	F_traW	F_trbC	G_ICEHIN1056_000310	G_ICEHIN1056_000410	G_ICEHIN1056_000440	G_ICEHIN1056_000510	G_ICEHIN1056_000520	I_traI	I_traK	I_traL	I_traM	I_traN	I_traP	I_traQ	I_traR	I_traW	I_traY
NC_009698	Clostridium_botulinum_A_str._Hall,_complete_genome._	Firmicutes;	Firmicutes	circular	3760560	3404	NOT4SS	MOB	O	NOT4SS_T4CP_MOB_O_400	2328	2329	virb4	traU	t4cp1@CLBO008c01_023290&0.990909&2.4e-21	t4cp2@CLBO008c01_023290&0.990991&2.3e-42	t4cp3	MOBC	MOBF	MOBH	MOBPHEN	MOBQ	MOBV@CLBO008c01_023280&0.965686&8e-39	MOBT	MOBB	F_traE	F_traH	F_traK	F_traL	F_traN	F_traU	F_traV	F_traW	F_trbC	G_ICEHIN1056_000310	G_ICEHIN1056_000410	G_ICEHIN1056_000440	G_ICEHIN1056_000510	G_ICEHIN1056_000520	I_traI	I_traK	I_traL	I_traM	I_traN	I_traP	I_traQ	I_traR	I_traW	I_traY
NC_011898	Clostridium_cellulolyticum_H10,_complete_genome._	Firmicutes;	Firmicutes	circular	4068724	3390	NOT4SS	MOB	O	NOT4SS_NOT4CP_MOB_O_405	1569	1591	virb4	traU	t4cp1	t4cp2	t4cp3	MOBC	MOBF	MOBH	MOBPHEN	MOBQ	MOBV	MOBT@CLCE001c01_015910&0.863388&4e-23@CLCE001c01_015800&0.863388&4e-23@CLCE001c01_015690&0.863388&4e-23	MOBB	F_traE	F_traH	F_traK	F_traL	F_traN	F_traU	F_traV	F_traW	F_trbC	G_ICEHIN1056_000310	G_ICEHIN1056_000410	G_ICEHIN1056_000440	G_ICEHIN1056_000510	G_ICEHIN1056_000520	I_traI	I_traK	I_traL	I_traM	I_traN	I_traP	I_traQ	I_traR	I_traW	I_traY
NC_011898	Clostridium_cellulolyticum_H10,_complete_genome._	Firmicutes;	Firmicutes	circular	4068724	3390	T4SS	NOMOB	O	T4SS_T4CP_NOMOB_O_406	2722	2733	virb4@CLCE001c01_027330&0.534464&4.7e-62	traU	t4cp1@CLCE001c01_027220&0.981818&6.3e-07	t4cp2@CLCE001c01_027220&0.963964&2.6e-44	t4cp3	MOBC	MOBF	MOBH	MOBPHEN	MOBQ	MOBV	MOBT	MOBB	F_traE	F_traH	F_traK	F_traL	F_traN	F_traU	F_traV	F_traW	F_trbC	G_ICEHIN1056_000310	G_ICEHIN1056_000410	G_ICEHIN1056_000440	G_ICEHIN1056_000510	G_ICEHIN1056_000520	I_traI	I_traK	I_traL	I_traM	I_traN	I_traP	I_traQ	I_traR	I_traW	I_traY
NC_011898	Clostridium_cellulolyticum_H10,_complete_genome._	Firmicutes;	Firmicutes	circular	4068724	3390	T4SS	CONJ	O	T4SS_T4CP_MOB_O_407	3104	3131	virb4@CLCE001c01_031040&0.564157&2.4e-70	traU	t4cp1@CLCE001c01_031300&0.990909&1.1e-12	t4cp2@CLCE001c01_031300&0.941441&1.1e-49	t4cp3	MOBC	MOBF	MOBH	MOBPHEN@CLCE001c01_031310&0.536481&4.1e-11	MOBQ	MOBV	MOBT	MOBB	F_traE	F_traH	F_traK	F_traL	F_traN	F_traU	F_traV	F_traW	F_trbC	G_ICEHIN1056_000310	G_ICEHIN1056_000410	G_ICEHIN1056_000440	G_ICEHIN1056_000510	G_ICEHIN1056_000520	I_traI	I_traK	I_traL	I_traM	I_traN	I_traP	I_traQ	I_traR	I_traW	I_traY
NC_009089	Clostridium_difficile_630,_complete_genome._	Firmicutes;	FA	circular	4290252	3742	T4SS	CONJ	O	T4SS_T4CP_MOB_O_408B	477	485	virb4@CLDI001c01_005210&0.776246&9.8e-100@CLDI001c01_004770&0.722163&7.7e-26	traU	t4cp1	t4cp2	t4cp3@CLDI001c01_004850&0.967672&7.8e-267	MOBC	MOBF	MOBH	MOBPHEN	MOBQ	MOBV	MOBT@CLDI001c01_004830&0.972678&2.9e-156	MOBB	F_traE	F_traH	F_traK	F_traL	F_traN	F_traU	F_traV	F_traW	F_trbC	G_ICEHIN1056_000310	G_ICEHIN1056_000410	G_ICEHIN1056_000440	G_ICEHIN1056_000510	G_ICEHIN1056_000520	I_traI	I_traK	I_traL	I_traM	I_traN	I_traP	I_traQ	I_traR	I_traW	I_traY
NC_009089	Clostridium_difficile_630,_complete_genome._	Firmicutes;	Firmicutes	circular	4290252	3742	T4SS	CONJ	O	T4SS_T4CP_MOB_O_408A	514	529	virb4@CLDI001c01_005210&0.776246&9.8e-100	traU	t4cp1@CLDI001c01_005140&0.981818&6.9e-20	t4cp2@CLDI001c01_005140&0.968468&2.4e-40	t4cp3	MOBC	MOBF	MOBH	MOBPHEN@CLDI001c01_005290&0.879828&1.8e-28	MOBQ	MOBV	MOBT	MOBB	F_traE	F_traH	F_traK	F_traL	F_traN	F_traU	F_traV	F_traW	F_trbC	G_ICEHIN1056_000310	G_ICEHIN1056_000410	G_ICEHIN1056_000440	G_ICEHIN1056_000510	G_ICEHIN1056_000520	I_traI	I_traK	I_traL	I_traM	I_traN	I_traP	I_traQ	I_traR	I_traW	I_traY
NC_009089	Clostridium_difficile_630,_complete_genome._	Firmicutes;	FA	circular	4290252	3742	T4SS	CONJ	O	T4SS_T4CP_MOB_O_409	607	613	virb4@CLDI001c01_006130&0.720042&2.9e-26	traU	t4cp1	t4cp2	t4cp3@CLDI001c01_006070&0.991379&7.4e-275	MOBC	MOBF	MOBH	MOBPHEN	MOBQ	MOBV	MOBT@CLDI001c01_006090&0.997268&2.4e-159	MOBB	F_traE	F_traH	F_traK	F_traL	F_traN	F_traU	F_traV	F_traW	F_trbC	G_ICEHIN1056_000310	G_ICEHIN1056_000410	G_ICEHIN1056_000440	G_ICEHIN1056_000510	G_ICEHIN1056_000520	I_traI	I_traK	I_traL	I_traM	I_traN	I_traP	I_traQ	I_traR	I_traW	I_traY
NC_009089	Clostridium_difficile_630,_complete_genome._	Firmicutes;	Firmicutes	circular	4290252	3742	T4SS	CONJ	O	T4SS_T4CP_MOB_O_410	1227	1245	virb4@CLDI001c01_012400&0.796394&2.9e-98	traU	t4cp1@CLDI001c01_012450&1&9e-20	t4cp2@CLDI001c01_012450&0.972973&3.7e-42	t4cp3	MOBC	MOBF	MOBH	MOBPHEN@CLDI001c01_012270&0.879828&1.1e-30	MOBQ	MOBV	MOBT	MOBB	F_traE	F_traH	F_traK	F_traL	F_traN	F_traU	F_traV	F_traW	F_trbC	G_ICEHIN1056_000310	G_ICEHIN1056_000410	G_ICEHIN1056_000440	G_ICEHIN1056_000510	G_ICEHIN1056_000520	I_traI	I_traK	I_traL	I_traM	I_traN	I_traP	I_traQ	I_traR	I_traW	I_traY
NC_009089	Clostridium_difficile_630,_complete_genome._	Firmicutes;	Firmicutes	circular	4290252	3742	T4SS	CONJ	O	T4SS_T4CP_MOB_O_411	1998	2020	virb4@CLDI001c01_020050&0.797455&8.1e-98	traU	t4cp1@CLDI001c01_019980&0.981818&3.6e-19	t4cp2@CLDI001c01_019980&0.968468&1.4e-41	t4cp3	MOBC	MOBF	MOBH	MOBPHEN@CLDI001c01_020200&0.866953&1.1e-28	MOBQ	MOBV	MOBT	MOBB	F_traE	F_traH	F_traK	F_traL	F_traN	F_traU	F_traV	F_traW	F_trbC	G_ICEHIN1056_000310	G_ICEHIN1056_000410	G_ICEHIN1056_000440	G_ICEHIN1056_000510	G_ICEHIN1056_000520	I_traI	I_traK	I_traL	I_traM	I_traN	I_traP	I_traQ	I_traR	I_traW	I_traY
NC_009089	Clostridium_difficile_630,_complete_genome._	Firmicutes;	Firmicutes	circular	4290252	3742	NOT4SS	MOB	O	NOT4SS_NOT4CP_MOB_O_412	2156	2156	virb4	traU	t4cp1	t4cp2	t4cp3	MOBC@CLDI001c01_021560&0.521327&2.4e-07	MOBF	MOBH	MOBPHEN	MOBQ	MOBV	MOBT	MOBB	F_traE	F_traH	F_traK	F_traL	F_traN	F_traU	F_traV	F_traW	F_trbC	G_ICEHIN1056_000310	G_ICEHIN1056_000410	G_ICEHIN1056_000440	G_ICEHIN1056_000510	G_ICEHIN1056_000520	I_traI	I_traK	I_traL	I_traM	I_traN	I_traP	I_traQ	I_traR	I_traW	I_traY
NC_009089	Clostridium_difficile_630,_complete_genome._	Firmicutes;	FA	circular	4290252	3742	T4SS	CONJ	O	T4SS_T4CP_MOB_O_413A	3501	3507	virb4@CLDI001c01_035010&0.721103&2.7e-28	traU	t4cp1	t4cp2	t4cp3@CLDI001c01_035070&1&5.1e-279	MOBC	MOBF	MOBH	MOBPHEN	MOBQ	MOBV	MOBT@CLDI001c01_035060&0.863388&1.1e-141	MOBB	F_traE	F_traH	F_traK	F_traL	F_traN	F_traU	F_traV	F_traW	F_trbC	G_ICEHIN1056_000310	G_ICEHIN1056_000410	G_ICEHIN1056_000440	G_ICEHIN1056_000510	G_ICEHIN1056_000520	I_traI	I_traK	I_traL	I_traM	I_traN	I_traP	I_traQ	I_traR	I_traW	I_traY
NC_009089	Clostridium_difficile_630,_complete_genome._	Firmicutes;	FA	circular	4290252	3742	T4SS	CONJ	O	T4SS_T4CP_MOB_O_413B	3547	3554	virb4@CLDI001c01_035470&0.722163&6.2e-27	traU	t4cp1	t4cp2	t4cp3@CLDI001c01_035540&1&9.3e-272	MOBC	MOBF	MOBH	MOBPHEN	MOBQ	MOBV	MOBT@CLDI001c01_035530&0.994536&3.5e-158	MOBB	F_traE	F_traH	F_traK	F_traL	F_traN	F_traU	F_traV	F_traW	F_trbC	G_ICEHIN1056_000310	G_ICEHIN1056_000410	G_ICEHIN1056_000440	G_ICEHIN1056_000510	G_ICEHIN1056_000520	I_traI	I_traK	I_traL	I_traM	I_traN	I_traP	I_traQ	I_traR	I_traW	I_traY
NC_013316	Clostridium_difficile_R20291,_complete_genome._	Firmicutes;	Firmicutes	circular	4191339	3507	T4SS	MOB	O	T4SS_NOT4CP_MOB_O_414	1790	1800	virb4@CLDI002c01_017900&0.776246&8.9e-100	traU	t4cp1	t4cp2	t4cp3	MOBC	MOBF	MOBH	MOBPHEN@CLDI002c01_018000&0.862661&2.7e-28	MOBQ	MOBV	MOBT	MOBB	F_traE	F_traH	F_traK	F_traL	F_traN	F_traU	F_traV	F_traW	F_trbC	G_ICEHIN1056_000310	G_ICEHIN1056_000410	G_ICEHIN1056_000440	G_ICEHIN1056_000510	G_ICEHIN1056_000520	I_traI	I_traK	I_traL	I_traM	I_traN	I_traP	I_traQ	I_traR	I_traW	I_traY
NC_013316	Clostridium_difficile_R20291,_complete_genome._	Firmicutes;	Firmicutes	circular	4191339	3507	NOT4SS	MOB	O	NOT4SS_NOT4CP_MOB_O_415	2947	2947	virb4	traU	t4cp1	t4cp2	t4cp3	MOBC	MOBF	MOBH	MOBPHEN	MOBQ	MOBV	MOBT@CLDI002c01_029470&0.972678&2e-109	MOBB	F_traE	F_traH	F_traK	F_traL	F_traN	F_traU	F_traV	F_traW	F_trbC	G_ICEHIN1056_000310	G_ICEHIN1056_000410	G_ICEHIN1056_000440	G_ICEHIN1056_000510	G_ICEHIN1056_000520	I_traI	I_traK	I_traL	I_traM	I_traN	I_traP	I_traQ	I_traR	I_traW	I_traY
NC_013316	Clostridium_difficile_R20291,_complete_genome._	Firmicutes;	FA	circular	4191339	3507	T4SS	CONJ	O	T4SS_T4CP_MOB_O_416	3451	3458	virb4@CLDI002c01_034570&0.720042&1.1e-25	traU	t4cp1	t4cp2	t4cp3@CLDI002c01_034510&1&2.7e-271	MOBC	MOBF	MOBH	MOBPHEN	MOBQ	MOBV	MOBT@CLDI002c01_034520&0.972678&5.4e-154	MOBB	F_traE	F_traH	F_traK	F_traL	F_traN	F_traU	F_traV	F_traW	F_trbC	G_ICEHIN1056_000310	G_ICEHIN1056_000410	G_ICEHIN1056_000440	G_ICEHIN1056_000510	G_ICEHIN1056_000520	I_traI	I_traK	I_traL	I_traM	I_traN	I_traP	I_traQ	I_traR	I_traW	I_traY
NC_013315	Clostridium_difficile_CD196,_complete_genome._	Firmicutes;	Firmicutes	circular	4110554	3454	NOT4SS	MOB	O	NOT4SS_NOT4CP_MOB_O_417	2975	2975	virb4	traU	t4cp1	t4cp2	t4cp3	MOBC	MOBF	MOBH	MOBPHEN	MOBQ	MOBV	MOBT@CLDI003c01_029750&0.972678&2e-109	MOBB	F_traE	F_traH	F_traK	F_traL	F_traN	F_traU	F_traV	F_traW	F_trbC	G_ICEHIN1056_000310	G_ICEHIN1056_000410	G_ICEHIN1056_000440	G_ICEHIN1056_000510	G_ICEHIN1056_000520	I_traI	I_traK	I_traL	I_traM	I_traN	I_traP	I_traQ	I_traR	I_traW	I_traY
NC_013315	Clostridium_difficile_CD196,_complete_genome._	Firmicutes;	FA	circular	4110554	3454	T4SS	CONJ	O	T4SS_T4CP_MOB_O_418	3479	3486	virb4@CLDI003c01_034850&0.720042&1.1e-25	traU	t4cp1	t4cp2	t4cp3@CLDI003c01_034790&1&2.7e-271	MOBC	MOBF	MOBH	MOBPHEN	MOBQ	MOBV	MOBT@CLDI003c01_034800&0.972678&5.4e-154	MOBB	F_traE	F_traH	F_traK	F_traL	F_traN	F_traU	F_traV	F_traW	F_trbC	G_ICEHIN1056_000310	G_ICEHIN1056_000410	G_ICEHIN1056_000440	G_ICEHIN1056_000510	G_ICEHIN1056_000520	I_traI	I_traK	I_traL	I_traM	I_traN	I_traP	I_traQ	I_traR	I_traW	I_traY
NC_013895	Clostridiales_genomosp._BVAB3_str._UPII9-5_chromosome,_complete_genome._	Firmicutes;	FA	circular	1810248	1526	NOT4SS	MOB	O	NOT4SS_T4CP_MOB_O_419	1148	1162	virb4	traU	t4cp1	t4cp2	t4cp3@CLGE001c01_011620&0.991379&3.3e-278	MOBC	MOBF	MOBH	MOBPHEN@CLGE001c01_011480&0.879828&9.1e-29	MOBQ	MOBV	MOBT@CLGE001c01_011610&0.997268&9.1e-161	MOBB	F_traE	F_traH	F_traK	F_traL	F_traN	F_traU	F_traV	F_traW	F_trbC	G_ICEHIN1056_000310	G_ICEHIN1056_000410	G_ICEHIN1056_000440	G_ICEHIN1056_000510	G_ICEHIN1056_000520	I_traI	I_traK	I_traL	I_traM	I_traN	I_traP	I_traQ	I_traR	I_traW	I_traY
NC_009706	Clostridium_kluyveri_DSM_555,_complete_genome._	Firmicutes;	Firmicutes	circular	3964618	3838	T4SS	CONJ	O	T4SS_T4CP_MOB_O_420	274	290	virb4@CLKL001c01_002840&0.788971&1.6e-99	traU	t4cp1@CLKL001c01_002900&0.981818&1e-18	t4cp2@CLKL001c01_002900&0.959459&1.7e-39	t4cp3	MOBC	MOBF	MOBH	MOBPHEN@CLKL001c01_002740&0.841202&4.7e-20	MOBQ	MOBV	MOBT	MOBB	F_traE	F_traH	F_traK	F_traL	F_traN	F_traU	F_traV	F_traW	F_trbC	G_ICEHIN1056_000310	G_ICEHIN1056_000410	G_ICEHIN1056_000440	G_ICEHIN1056_000510	G_ICEHIN1056_000520	I_traI	I_traK	I_traL	I_traM	I_traN	I_traP	I_traQ	I_traR	I_traW	I_traY
NC_009706	Clostridium_kluyveri_DSM_555,_complete_genome._	Firmicutes;	Firmicutes	circular	3964618	3838	NOT4SS	MOB	O	NOT4SS_NOT4CP_MOB_O_421	2855	2855	virb4	traU	t4cp1	t4cp2	t4cp3	MOBC	MOBF	MOBH	MOBPHEN	MOBQ	MOBV@CLKL001c01_028550&0.960784&4.2e-52	MOBT	MOBB	F_traE	F_traH	F_traK	F_traL	F_traN	F_traU	F_traV	F_traW	F_trbC	G_ICEHIN1056_000310	G_ICEHIN1056_000410	G_ICEHIN1056_000440	G_ICEHIN1056_000510	G_ICEHIN1056_000520	I_traI	I_traK	I_traL	I_traM	I_traN	I_traP	I_traQ	I_traR	I_traW	I_traY
NC_009706	Clostridium_kluyveri_DSM_555,_complete_genome._	Firmicutes;	Firmicutes	circular	3964618	3838	T4SS	NOMOB	O	T4SS_T4CP_NOMOB_O_422	3854	3869	virb4@CLKL001c01_038690&0.540827&4e-63	traU	t4cp1@CLKL001c01_038540&0.990909&2.6e-10	t4cp2@CLKL001c01_038540&0.945946&3.2e-45	t4cp3	MOBC	MOBF	MOBH	MOBPHEN	MOBQ	MOBV	MOBT	MOBB	F_traE	F_traH	F_traK	F_traL	F_traN	F_traU	F_traV	F_traW	F_trbC	G_ICEHIN1056_000310	G_ICEHIN1056_000410	G_ICEHIN1056_000440	G_ICEHIN1056_000510	G_ICEHIN1056_000520	I_traI	I_traK	I_traL	I_traM	I_traN	I_traP	I_traQ	I_traR	I_traW	I_traY
NC_011837	Clostridium_kluyveri_NBRC_12016,_complete_genome._	Firmicutes;	Firmicutes	circular	3896121	3468	T4SS	CONJ	O	T4SS_T4CP_MOB_O_423	263	276	virb4@CLKL002c01_002710&0.769883&5.6e-95	traU	t4cp1@CLKL002c01_002760&0.981818&1.1e-18	t4cp2@CLKL002c01_002760&0.959459&1.8e-39	t4cp3	MOBC	MOBF	MOBH	MOBPHEN@CLKL002c01_002630&0.841202&4.7e-20	MOBQ	MOBV	MOBT	MOBB	F_traE	F_traH	F_traK	F_traL	F_traN	F_traU	F_traV	F_traW	F_trbC	G_ICEHIN1056_000310	G_ICEHIN1056_000410	G_ICEHIN1056_000440	G_ICEHIN1056_000510	G_ICEHIN1056_000520	I_traI	I_traK	I_traL	I_traM	I_traN	I_traP	I_traQ	I_traR	I_traW	I_traY
NC_011837	Clostridium_kluyveri_NBRC_12016,_complete_genome._	Firmicutes;	Firmicutes	circular	3896121	3468	NOT4SS	MOB	O	NOT4SS_NOT4CP_MOB_O_424	2590	2590	virb4	traU	t4cp1	t4cp2	t4cp3	MOBC	MOBF	MOBH	MOBPHEN	MOBQ	MOBV@CLKL002c01_025900&0.960784&4.2e-52	MOBT	MOBB	F_traE	F_traH	F_traK	F_traL	F_traN	F_traU	F_traV	F_traW	F_trbC	G_ICEHIN1056_000310	G_ICEHIN1056_000410	G_ICEHIN1056_000440	G_ICEHIN1056_000510	G_ICEHIN1056_000520	I_traI	I_traK	I_traL	I_traM	I_traN	I_traP	I_traQ	I_traR	I_traW	I_traY
NC_011837	Clostridium_kluyveri_NBRC_12016,_complete_genome._	Firmicutes;	Firmicutes	circular	3896121	3468	T4SS	NOMOB	O	T4SS_T4CP_NOMOB_O_425	3487	3500	virb4@CLKL002c01_035000&0.540827&5e-63	traU	t4cp1@CLKL002c01_034870&0.990909&2.6e-10	t4cp2@CLKL002c01_034870&0.945946&3.2e-45	t4cp3	MOBC	MOBF	MOBH	MOBPHEN	MOBQ	MOBV	MOBT	MOBB	F_traE	F_traH	F_traK	F_traL	F_traN	F_traU	F_traV	F_traW	F_trbC	G_ICEHIN1056_000310	G_ICEHIN1056_000410	G_ICEHIN1056_000440	G_ICEHIN1056_000510	G_ICEHIN1056_000520	I_traI	I_traK	I_traL	I_traM	I_traN	I_traP	I_traQ	I_traR	I_traW	I_traY
NC_009012	Clostridium_thermocellum_ATCC_27405,_complete_genome._	Firmicutes;	Firmicutes	circular	3843301	3189	NOT4SS	MOB	O	NOT4SS_NOT4CP_MOB_O_431	3256	3256	virb4	traU	t4cp1	t4cp2	t4cp3	MOBC	MOBF	MOBH	MOBPHEN@CLTH001c01_032560&0.965665&2.3e-29	MOBQ	MOBV	MOBT	MOBB	F_traE	F_traH	F_traK	F_traL	F_traN	F_traU	F_traV	F_traW	F_trbC	G_ICEHIN1056_000310	G_ICEHIN1056_000410	G_ICEHIN1056_000440	G_ICEHIN1056_000510	G_ICEHIN1056_000520	I_traI	I_traK	I_traL	I_traM	I_traN	I_traP	I_traQ	I_traR	I_traW	I_traY
NC_002971	Coxiella_burnetii_RSA_493,_complete_genome._	Proteobacteria;	Gammaproteobacteria	circular	1995281	1818	T4SS	CONJ	I	T4SS_T4CP_MOB_I_436_O_434_435	505	1458	virb4@COBU001c01_014320&0.796394&3.2e-14	traU@COBU001c01_014320&0.987103&0	t4cp1@COBU001c01_014420&0.981818&1.3e-12	t4cp2@COBU001c01_014420&0.986486&7.2e-35@COBU001c01_009190&0.509009&0.0013	t4cp3	MOBC	MOBF	MOBH@COBU001c01_005050&0.72549&0.00063&3.3e-05	MOBPHEN	MOBQ	MOBV	MOBT	MOBB	F_traE	F_traH	F_traK	F_traL	F_traN	F_traU	F_traV	F_traW	F_trbC	G_ICEHIN1056_000310	G_ICEHIN1056_000410	G_ICEHIN1056_000440	G_ICEHIN1056_000510	G_ICEHIN1056_000520	I_traI@COBU001c01_014540&0.952381&9.8e-82	I_traK@COBU001c01_014510&0.908046&1.2e-19	I_traL	I_traM@COBU001c01_014400&0.860262&5.8e-38@COBU001c01_014390&0.847162&1.1e-44	I_traN@COBU001c01_014380&0.943452&7.1e-69	I_traP@COBU001c01_014360&0.916318&4.6e-11	I_traQ@COBU001c01_014350&0.748603&2.1e-05&0.0012	I_traR	I_traW	I_traY@COBU001c01_014580&0.957047&6.4e-75
NC_010117	Coxiella_burnetii_RSA_331,_complete_genome._	Proteobacteria;	Gammaproteobacteria	circular	2016427	1930	T4SS	CONJ	I	T4SS_T4CP_MOB_I_439_O_437_438	609	1629	virb4@COBU002c01_015900&0.796394&3.2e-14	traU@COBU002c01_015900&0.987103&0	t4cp1@COBU002c01_016000&0.981818&1.3e-12	t4cp2@COBU002c01_016000&0.986486&7.2e-35@COBU002c01_008260&0.509009&0.0013	t4cp3	MOBC	MOBF	MOBH@COBU002c01_006090&0.720588&0.0005&3.3e-05	MOBPHEN	MOBQ	MOBV	MOBT	MOBB	F_traE	F_traH	F_traK	F_traL	F_traN	F_traU	F_traV	F_traW	F_trbC	G_ICEHIN1056_000310	G_ICEHIN1056_000410	G_ICEHIN1056_000440	G_ICEHIN1056_000510	G_ICEHIN1056_000520	I_traI@COBU002c01_016160&0.952381&9.8e-82	I_traK@COBU002c01_016130&0.908046&1.2e-19	I_traL	I_traM@COBU002c01_015980&0.860262&5.8e-38@COBU002c01_015970&0.847162&1.1e-44	I_traN@COBU002c01_015960&0.943452&1.4e-68	I_traP@COBU002c01_015940&0.916318&4.6e-11	I_traQ@COBU002c01_015930&0.748603&2.1e-05&0.0012	I_traR	I_traW	I_traY@COBU002c01_016290&0.947651&1.1e-72
NC_011527	Coxiella_burnetii_CbuG_Q212,_complete_genome._	Proteobacteria;	Gammaproteobacteria	circular	2008870	1871	T4SS	CONJ	I	T4SS_T4CP_MOB_I_440_O_441_442	347	1308	virb4@COBU003c01_003750&0.795334&1e-13	traU@COBU003c01_003750&0.987103&0	t4cp1@COBU003c01_003650&0.981818&1.2e-12	t4cp2@COBU003c01_003650&0.986486&3.1e-34@COBU003c01_008980&0.509009&0.0013	t4cp3	MOBC	MOBF	MOBH@COBU003c01_013080&0.72549&0.00048&3.3e-05	MOBPHEN	MOBQ	MOBV	MOBT	MOBB	F_traE	F_traH	F_traK	F_traL	F_traN	F_traU	F_traV	F_traW	F_trbC	G_ICEHIN1056_000310	G_ICEHIN1056_000410	G_ICEHIN1056_000440	G_ICEHIN1056_000510	G_ICEHIN1056_000520	I_traI@COBU003c01_003530&0.952381&5.8e-82	I_traK@COBU003c01_003560&0.908046&1.2e-19	I_traL	I_traM@COBU003c01_003680&0.847162&1.1e-44@COBU003c01_003670&0.860262&5.8e-38	I_traN@COBU003c01_003690&0.943452&1.3e-68	I_traP@COBU003c01_003710&0.916318&1.1e-10	I_traQ@COBU003c01_003720&0.748603&2.1e-05&0.0012	I_traR	I_traW	I_traY@COBU003c01_003470&0.957047&9e-75
NC_011528	Coxiella_burnetii_CbuK_Q154,_complete_genome._	Proteobacteria;	Gammaproteobacteria	circular	2063100	1905	T4SS	CONJ	I	T4SS_T4CP_MOB_I_445_O_443_444	749	1702	virb4@COBU004c01_016740&0.796394&1.3e-14	traU@COBU004c01_016740&0.987103&0	t4cp1@COBU004c01_016840&0.981818&1.2e-12	t4cp2@COBU004c01_016840&0.986486&7.2e-35@COBU004c01_007490&0.509009&0.00081	t4cp3	MOBC	MOBF	MOBH@COBU004c01_011620&0.72549&0.00048&3.3e-05	MOBPHEN	MOBQ	MOBV	MOBT	MOBB	F_traE	F_traH	F_traK	F_traL	F_traN	F_traU	F_traV	F_traW	F_trbC	G_ICEHIN1056_000310	G_ICEHIN1056_000410	G_ICEHIN1056_000440	G_ICEHIN1056_000510	G_ICEHIN1056_000520	I_traI@COBU004c01_016960&0.952381&1.5e-82	I_traK@COBU004c01_016930&0.908046&1.2e-19	I_traL	I_traM@COBU004c01_016820&0.860262&5.8e-38@COBU004c01_016810&0.847162&1.1e-44	I_traN@COBU004c01_016800&0.943452&2.6e-68	I_traP@COBU004c01_016780&0.916318&2.4e-10	I_traQ@COBU004c01_016770&0.748603&2.1e-05&0.0012	I_traR	I_traW	I_traY@COBU004c01_017020&0.957047&8.5e-75
NC_009727	Coxiella_burnetii_Dugway_5J108-111,_complete_genome._	Proteobacteria;	Gammaproteobacteria	circular	2158758	1993	T4SS	CONJ	I	T4SS_T4CP_MOB_I_446_O_447_448	336	1393	virb4@COBU005c01_003640&0.796394&3.2e-14	traU@COBU005c01_003640&0.987103&0	t4cp1@COBU005c01_003540&0.981818&1.2e-12	t4cp2@COBU005c01_003540&0.986486&7.2e-35@COBU005c01_009470&0.509009&0.0013	t4cp3	MOBC	MOBF	MOBH@COBU005c01_013930&0.72549&0.00048&3.3e-05	MOBPHEN	MOBQ	MOBV	MOBT	MOBB	F_traE	F_traH	F_traK	F_traL	F_traN	F_traU	F_traV	F_traW	F_trbC	G_ICEHIN1056_000310	G_ICEHIN1056_000410	G_ICEHIN1056_000440	G_ICEHIN1056_000510	G_ICEHIN1056_000520	I_traI@COBU005c01_003400&0.952381&7.1e-83	I_traK@COBU005c01_003430&0.908046&1.2e-19	I_traL	I_traM@COBU005c01_003570&0.847162&1.1e-44@COBU005c01_003560&0.860262&5.8e-38	I_traN@COBU005c01_003580&0.943452&9.7e-69	I_traP@COBU005c01_003600&0.916318&1.1e-10	I_traQ@COBU005c01_003610&0.748603&2.1e-05&0.0012	I_traR@COBU005c01_003620&0.671642&1.7e-05	I_traW	I_traY@COBU005c01_003360&0.957047&5.6e-76
NC_003910	Colwellia_psychrerythraea_34H,_complete_genome._	Proteobacteria;	Gammaproteobacteria	circular	5373180	4910	NOT4SS	MOB	O	NOT4SS_NOT4CP_MOB_O_454	494	494	virb4	traU	t4cp1	t4cp2	t4cp3	MOBC	MOBF	MOBH	MOBPHEN@COPS001c01_004940&0.806867&4.3e-07	MOBQ	MOBV	MOBT	MOBB	F_traE	F_traH	F_traK	F_traL	F_traN	F_traU	F_traV	F_traW	F_trbC	G_ICEHIN1056_000310	G_ICEHIN1056_000410	G_ICEHIN1056_000440	G_ICEHIN1056_000510	G_ICEHIN1056_000520	I_traI	I_traK	I_traL	I_traM	I_traN	I_traP	I_traQ	I_traR	I_traW	I_traY
NC_013739	Conexibacter_woesei_DSM_14684,_complete_genome._	Actinobacteria;	Actinobacteria	circular	6359369	5914	NOT4SS	MOB	O	NOT4SS_T4CP_MOB_O_458	1442	1473	virb4	traU	t4cp1@COWO001c01_014420&0.981818&1.6e-12	t4cp2@COWO001c01_014420&0.725225&2.7e-23	t4cp3	MOBC	MOBF@COWO001c01_014730&0.986364&3.3e-90	MOBH	MOBPHEN	MOBQ	MOBV	MOBT	MOBB	F_traE	F_traH	F_traK	F_traL	F_traN	F_traU	F_traV	F_traW	F_trbC	G_ICEHIN1056_000310	G_ICEHIN1056_000410	G_ICEHIN1056_000440	G_ICEHIN1056_000510	G_ICEHIN1056_000520	I_traI	I_traK	I_traL	I_traM	I_traN	I_traP	I_traQ	I_traR	I_traW	I_traY
NC_007973	Ralstonia_metallidurans_CH34_chromosome_1,_complete_sequence._	Proteobacteria;	Betaproteobacteria	circular	3928089	3601	T4SS	CONJ	T	T4SS_T4CP_MOB_T_462_O_461	1273	1361	virb4@CUME001c01_013560&0.801697&6.8e-186	traU	t4cp1@CUME001c01_013510&1&9e-25	t4cp2@CUME001c01_013510&1&1.4e-54	t4cp3	MOBC	MOBF	MOBH	MOBPHEN@CUME001c01_012730&0.879828&3.4e-26	MOBQ	MOBV	MOBT	MOBB	F_traE	F_traH	F_traK	F_traL	F_traN	F_traU	F_traV	F_traW	F_trbC	G_ICEHIN1056_000310	G_ICEHIN1056_000410	G_ICEHIN1056_000440	G_ICEHIN1056_000510	G_ICEHIN1056_000520	I_traI	I_traK	I_traL	I_traM	I_traN	I_traP	I_traQ	I_traR	I_traW	I_traY
NC_007973	Ralstonia_metallidurans_CH34_chromosome_1,_complete_sequence._	Proteobacteria;	Betaproteobacteria	circular	3928089	3601	T4SS	CONJ	T	T4SS_T4CP_MOB_T_463	1501	1570	virb4@CUME001c01_015650&0.823966&1.1e-183	traU	t4cp1@CUME001c01_015600&1&9e-25	t4cp2@CUME001c01_015600&1&1.2e-55	t4cp3	MOBC	MOBF	MOBH	MOBPHEN@CUME001c01_015010&0.729614&2.4e-23	MOBQ	MOBV	MOBT	MOBB	F_traE	F_traH	F_traK	F_traL	F_traN	F_traU	F_traV	F_traW	F_trbC	G_ICEHIN1056_000310	G_ICEHIN1056_000410	G_ICEHIN1056_000440	G_ICEHIN1056_000510	G_ICEHIN1056_000520	I_traI	I_traK	I_traL	I_traM	I_traN	I_traP	I_traQ	I_traR	I_traW	I_traY
NC_007973	Ralstonia_metallidurans_CH34_chromosome_1,_complete_sequence._	Proteobacteria;	Betaproteobacteria	circular	3928089	3601	T4SS	CONJ	G	T4SS_T4CP_MOB_G_464	2355	2388	virb4@CUME001c01_023770&0.820785&2.2e-89	traU	t4cp1@CUME001c01_023600&0.990909&5.6e-11	t4cp2@CUME001c01_023600&0.977477&2.4e-30	t4cp3	MOBC	MOBF	MOBH@CUME001c01_023880&0.911765&2.7e-43	MOBPHEN	MOBQ	MOBV	MOBT	MOBB	F_traE@CUME001c01_023730&0.512953&0.00028	F_traH	F_traK	F_traL	F_traN	F_traU	F_traV	F_traW	F_trbC	G_ICEHIN1056_000310@CUME001c01_023550&0.970297&3.9e-72	G_ICEHIN1056_000410@CUME001c01_023730&0.963801&1.5e-109	G_ICEHIN1056_000440@CUME001c01_023760&0.985507&6.4e-64	G_ICEHIN1056_000510@CUME001c01_023820&0.991247&4e-205	G_ICEHIN1056_000520@CUME001c01_023810&0.987915&2.9e-150	I_traI	I_traK	I_traL	I_traM	I_traN	I_traP	I_traQ	I_traR	I_traW	I_traY
NC_007973	Ralstonia_metallidurans_CH34_chromosome_1,_complete_sequence._	Proteobacteria;	Betaproteobacteria	circular	3928089	3601	NOT4SS	MOB	O	NOT4SS_NOT4CP_MOB_O_465	2855	2867	virb4	traU	t4cp1	t4cp2	t4cp3	MOBC	MOBF	MOBH	MOBPHEN@CUME001c01_028670&0.798283&4.5e-30	MOBQ	MOBV	MOBT	MOBB	F_traE	F_traH	F_traK	F_traL	F_traN	F_traU	F_traV	F_traW	F_trbC	G_ICEHIN1056_000310	G_ICEHIN1056_000410	G_ICEHIN1056_000440	G_ICEHIN1056_000510	G_ICEHIN1056_000520	I_traI	I_traK	I_traL	I_traM	I_traN	I_traP	I_traQ	I_traR	I_traW	I_traY@CUME001c01_028550&0.978523&9.3e-166
NC_007973	Ralstonia_metallidurans_CH34_chromosome_1,_complete_sequence._	Proteobacteria;	Betaproteobacteria	circular	3928089	3601	NOT4SS	MOB	O	NOT4SS_NOT4CP_MOB_O_466	3046	3046	virb4	traU	t4cp1	t4cp2	t4cp3	MOBC	MOBF	MOBH	MOBPHEN@CUME001c01_030460&0.785408&1e-24	MOBQ	MOBV	MOBT	MOBB	F_traE	F_traH	F_traK	F_traL	F_traN	F_traU	F_traV	F_traW	F_trbC	G_ICEHIN1056_000310	G_ICEHIN1056_000410	G_ICEHIN1056_000440	G_ICEHIN1056_000510	G_ICEHIN1056_000520	I_traI	I_traK	I_traL	I_traM	I_traN	I_traP	I_traQ	I_traR	I_traW	I_traY
NC_010547	Cyanothece_sp._ATCC_51142_chromosome_linear,_complete_sequence._	Cyanobacteria;	Cyanobacteria	linear	429701	449	T4SS	CONJ	O	T4SS_T4CP_MOB_O_469A	213	226	virb4@CYTC001c02_002180&0.658537&6.4e-37	traU	t4cp1@CYTC001c02_002260&0.981818&3.2e-11	t4cp2@CYTC001c02_002260&0.945946&2.7e-37	t4cp3	MOBC	MOBF	MOBH	MOBPHEN@CYTC001c02_002130&0.939914&1.2e-41	MOBQ	MOBV	MOBT	MOBB	F_traE	F_traH	F_traK	F_traL	F_traN	F_traU	F_traV	F_traW	F_trbC	G_ICEHIN1056_000310	G_ICEHIN1056_000410	G_ICEHIN1056_000440	G_ICEHIN1056_000510	G_ICEHIN1056_000520	I_traI	I_traK	I_traL	I_traM	I_traN	I_traP	I_traQ	I_traR	I_traW	I_traY
NC_010547	Cyanothece_sp._ATCC_51142_chromosome_linear,_complete_sequence._	Cyanobacteria;	Cyanobacteria	linear	429701	449	T4SS	CONJ	O	T4SS_T4CP_MOB_O_469B	242	259	virb4@CYTC001c02_002590&0.528102&3.9e-20	traU	t4cp1@CYTC001c02_002500&0.990909&1.3e-17	t4cp2@CYTC001c02_002500&0.963964&2.1e-38	t4cp3	MOBC	MOBF@CYTC001c02_002420&0.926136&5.2e-152	MOBH	MOBPHEN	MOBQ	MOBV	MOBT	MOBB	F_traE	F_traH	F_traK	F_traL	F_traN	F_traU	F_traV	F_traW	F_trbC	G_ICEHIN1056_000310	G_ICEHIN1056_000410	G_ICEHIN1056_000440	G_ICEHIN1056_000510	G_ICEHIN1056_000520	I_traI	I_traK	I_traL	I_traM	I_traN	I_traP	I_traQ	I_traR	I_traW	I_traY
NC_011729	Cyanothece_sp._PCC_7424,_complete_genome._	Cyanobacteria;	Cyanobacteria	circular	5942652	5227	T4SS	CONJ	O	T4SS_T4CP_MOB_O_470	2434	2449	virb4@CYTC003c01_024340&0.770944&5.5e-32	traU	t4cp1@CYTC003c01_024430&0.981818&6.3e-15	t4cp2@CYTC003c01_024430&0.986486&2.9e-39	t4cp3	MOBC	MOBF	MOBH	MOBPHEN@CYTC003c01_024490&0.93133&8.5e-39	MOBQ	MOBV	MOBT	MOBB	F_traE	F_traH	F_traK	F_traL	F_traN	F_traU	F_traV	F_traW	F_trbC	G_ICEHIN1056_000310	G_ICEHIN1056_000410	G_ICEHIN1056_000440	G_ICEHIN1056_000510	G_ICEHIN1056_000520	I_traI	I_traK	I_traL	I_traM	I_traN	I_traP	I_traQ	I_traR	I_traW	I_traY
NC_011729	Cyanothece_sp._PCC_7424,_complete_genome._	Cyanobacteria;	Cyanobacteria	circular	5942652	5227	T4SS	NOMOB	O	T4SS_NOT4CP_NOMOB_O_472	3150	3150	virb4@CYTC003c01_031500&0.710498&2.2e-42	traU	t4cp1	t4cp2	t4cp3	MOBC	MOBF	MOBH	MOBPHEN	MOBQ	MOBV	MOBT	MOBB	F_traE	F_traH	F_traK	F_traL	F_traN	F_traU	F_traV	F_traW	F_trbC	G_ICEHIN1056_000310	G_ICEHIN1056_000410	G_ICEHIN1056_000440	G_ICEHIN1056_000510	G_ICEHIN1056_000520	I_traI	I_traK	I_traL	I_traM	I_traN	I_traP	I_traQ	I_traR	I_traW	I_traY
NC_011729	Cyanothece_sp._PCC_7424,_complete_genome._	Cyanobacteria;	Cyanobacteria	circular	5942652	5227	T4SS	CONJ	O	T4SS_T4CP_MOB_O_473	3822	3847	virb4@CYTC003c01_038470&0.7614&2e-31	traU	t4cp1@CYTC003c01_038340&0.981818&4.1e-15	t4cp2@CYTC003c01_038340&0.986486&3.2e-39	t4cp3	MOBC	MOBF	MOBH	MOBPHEN@CYTC003c01_038220&0.93133&8.6e-39	MOBQ	MOBV	MOBT	MOBB	F_traE	F_traH	F_traK	F_traL	F_traN	F_traU	F_traV	F_traW	F_trbC	G_ICEHIN1056_000310	G_ICEHIN1056_000410	G_ICEHIN1056_000440	G_ICEHIN1056_000510	G_ICEHIN1056_000520	I_traI	I_traK	I_traL	I_traM	I_traN	I_traP	I_traQ	I_traR	I_traW	I_traY
NC_011884	Cyanothece_sp._PCC_7425,_complete_genome._	Cyanobacteria;	Cyanobacteria	circular	5374574	4966	NOT4SS	MOB	O	NOT4SS_NOT4CP_MOB_O_475	3875	3875	virb4	traU	t4cp1	t4cp2	t4cp3	MOBC	MOBF	MOBH	MOBPHEN	MOBQ@CYTC004c01_038750&0.852535&8.8e-38	MOBV	MOBT	MOBB	F_traE	F_traH	F_traK	F_traL	F_traN	F_traU	F_traV	F_traW	F_trbC	G_ICEHIN1056_000310	G_ICEHIN1056_000410	G_ICEHIN1056_000440	G_ICEHIN1056_000510	G_ICEHIN1056_000520	I_traI	I_traK	I_traL	I_traM	I_traN	I_traP	I_traQ	I_traR	I_traW	I_traY
NC_010002	Delftia_acidovorans_SPH-1,_complete_genome._	Proteobacteria;	Betaproteobacteria	circular	6767514	6040	T4SS	CONJ	T	T4SS_T4CP_MOB_T_476	430	453	virb4@DEAC001c01_004350&0.819724&3.9e-184	traU	t4cp1@DEAC001c01_004400&1&9.2e-25	t4cp2@DEAC001c01_004400&1&6.9e-56	t4cp3	MOBC	MOBF	MOBH	MOBPHEN@DEAC001c01_004530&0.733906&4e-21	MOBQ	MOBV	MOBT	MOBB	F_traE	F_traH	F_traK	F_traL	F_traN	F_traU	F_traV	F_traW	F_trbC	G_ICEHIN1056_000310	G_ICEHIN1056_000410	G_ICEHIN1056_000440	G_ICEHIN1056_000510	G_ICEHIN1056_000520	I_traI	I_traK	I_traL	I_traM	I_traN	I_traP	I_traQ	I_traR	I_traW	I_traY
NC_010002	Delftia_acidovorans_SPH-1,_complete_genome._	Proteobacteria;	Betaproteobacteria	circular	6767514	6040	T4SS	CONJ	T	T4SS_T4CP_MOB_T_477	2722	2747	virb4@DEAC001c01_027270&0.801697&9.8e-182	traU	t4cp1@DEAC001c01_027320&1&1.1e-24	t4cp2@DEAC001c01_027320&1&4.2e-56	t4cp3	MOBC	MOBF	MOBH	MOBPHEN@DEAC001c01_027470&0.742489&3.2e-26	MOBQ	MOBV	MOBT	MOBB	F_traE	F_traH	F_traK	F_traL	F_traN	F_traU	F_traV	F_traW	F_trbC	G_ICEHIN1056_000310	G_ICEHIN1056_000410	G_ICEHIN1056_000440	G_ICEHIN1056_000510	G_ICEHIN1056_000520	I_traI	I_traK	I_traL	I_traM	I_traN	I_traP	I_traQ	I_traR	I_traW	I_traY
NC_010002	Delftia_acidovorans_SPH-1,_complete_genome._	Proteobacteria;	Betaproteobacteria	circular	6767514	6040	T4SS	CONJ	G	T4SS_T4CP_MOB_G_479	4203	4229	virb4@DEAC001c01_042180&0.817603&1.1e-90	traU	t4cp1@DEAC001c01_042080&0.990909&4.9e-10	t4cp2@DEAC001c01_042080&0.972973&1.4e-30	t4cp3	MOBC	MOBF	MOBH@DEAC001c01_042290&0.906863&1.7e-43	MOBPHEN	MOBQ	MOBV	MOBT	MOBB	F_traE	F_traH	F_traK	F_traL	F_traN	F_traU	F_traV	F_traW	F_trbC	G_ICEHIN1056_000310@DEAC001c01_042030&0.915842&1.7e-73	G_ICEHIN1056_000410@DEAC001c01_042140&0.959276&6e-108	G_ICEHIN1056_000440@DEAC001c01_042170&0.985507&3.8e-64	G_ICEHIN1056_000510@DEAC001c01_042230&0.984683&6.8e-205	G_ICEHIN1056_000520@DEAC001c01_042220&0.996979&1.4e-151	I_traI	I_traK	I_traL	I_traM	I_traN	I_traP	I_traQ	I_traR	I_traW	I_traY
NC_013943	Denitrovibrio_acetiphilus_DSM_12809_chromosome,_complete_genome._	Deferribacteres;	Deferribacteres	circular	3222077	2964	T4SS	CONJ	F	T4SS_T4CP_MOB_F_480	553	650	virb4@DEAE001c01_005580&0.792153&3.6e-91	traU	t4cp1@DEAE001c01_005920&0.754545&3.9e-10	t4cp2@DEAE001c01_005920&0.716216&5.4e-19	t4cp3	MOBC	MOBF	MOBH	MOBPHEN@DEAE001c01_006500&0.832618&4.2e-22	MOBQ	MOBV	MOBT	MOBB	F_traE@DEAE001c01_005540&0.948187&1.6e-29	F_traH@DEAE001c01_005660&0.89154&8.9e-53	F_traK@DEAE001c01_005550&0.676259&1.2e-11	F_traL@DEAE001c01_005530&0.92&1.4e-13	F_traN@DEAE001c01_005900&0.68855&3.7e-43	F_traU@DEAE001c01_005610&0.949102&1.7e-77	F_traV@DEAE001c01_005570&0.571429&4.4e-13	F_traW@DEAE001c01_005600&0.924528&4.7e-33	F_trbC@DEAE001c01_005880&0.917031&3.5e-32	G_ICEHIN1056_000310	G_ICEHIN1056_000410	G_ICEHIN1056_000440	G_ICEHIN1056_000510	G_ICEHIN1056_000520	I_traI	I_traK	I_traL	I_traM	I_traN	I_traP	I_traQ	I_traR	I_traW	I_traY
NC_007298	Dechloromonas_aromatica_RCB,_complete_genome._	Proteobacteria;	Betaproteobacteria	circular	4501104	4171	T4SS	CONJ	F	T4SS_T4CP_MOB_F_485	2343	2367	virb4@DEAR001c01_023570&0.806999&3e-113	traU	t4cp1@DEAR001c01_023440&0.845455&1.2e-08	t4cp2@DEAR001c01_023440&0.986486&3.8e-26	t4cp3	MOBC	MOBF	MOBH@DEAR001c01_023430&0.995098&1.7e-48	MOBPHEN	MOBQ	MOBV	MOBT	MOBB	F_traE@DEAR001c01_023520&0.948187&4.3e-38	F_traH@DEAR001c01_023670&0.941432&3.1e-84	F_traK@DEAR001c01_023530&0.834532&3.9e-25	F_traL@DEAR001c01_023510&0.97&1.5e-23	F_traN@DEAR001c01_023640&0.952672&5.4e-78	F_traU@DEAR001c01_023620&0.961078&1.3e-126	F_traV@DEAR001c01_023560&0.730612&4.1e-36	F_traW@DEAR001c01_023610&0.929245&1.2e-65	F_trbC@DEAR001c01_023630&0.829694&1.3e-38	G_ICEHIN1056_000310	G_ICEHIN1056_000410	G_ICEHIN1056_000440	G_ICEHIN1056_000510	G_ICEHIN1056_000520	I_traI	I_traK	I_traL	I_traM	I_traN	I_traP	I_traQ	I_traR	I_traW	I_traY
NC_007298	Dechloromonas_aromatica_RCB,_complete_genome._	Proteobacteria;	Betaproteobacteria	circular	4501104	4171	T4SS	CONJ	F	T4SS_T4CP_MOB_F_486	2632	2698	virb4@DEAR001c01_026880&0.806999&7.2e-113	traU	t4cp1@DEAR001c01_026330&0.845455&8.7e-09	t4cp2@DEAR001c01_026330&0.986486&1.1e-25	t4cp3	MOBC	MOBF	MOBH@DEAR001c01_026320&1&2.7e-48	MOBPHEN	MOBQ	MOBV	MOBT	MOBB	F_traE@DEAR001c01_026830&0.948187&1.3e-38	F_traH@DEAR001c01_026980&0.939262&9.5e-85	F_traK@DEAR001c01_026840&0.78777&1.6e-25	F_traL@DEAR001c01_026820&0.97&1.5e-23	F_traN@DEAR001c01_026950&0.90687&2e-77	F_traU@DEAR001c01_026930&0.961078&2.1e-126	F_traV@DEAR001c01_026870&0.722449&2.6e-36	F_traW@DEAR001c01_026920&0.938679&1.5e-64	F_trbC@DEAR001c01_026940&0.895197&2.5e-40	G_ICEHIN1056_000310	G_ICEHIN1056_000410	G_ICEHIN1056_000440	G_ICEHIN1056_000510	G_ICEHIN1056_000520	I_traI	I_traK	I_traL	I_traM	I_traN	I_traP	I_traQ	I_traR	I_traW	I_traY
NC_013216	Desulfotomaculum_acetoxidans_DSM_771,_complete_genome._	Firmicutes;	Firmicutes	circular	4545624	4068	T4SS	CONJ	O	T4SS_T4CP_MOB_O_492	1438	1450	virb4@DEAX001c01_014380&0.546129&3.8e-67	traU	t4cp1@DEAX001c01_014500&0.990909&1.3e-10	t4cp2@DEAX001c01_014500&0.968468&1.1e-45	t4cp3	MOBC	MOBF	MOBH	MOBPHEN@DEAX001c01_014480&0.51073&1.8e-06	MOBQ	MOBV	MOBT	MOBB	F_traE	F_traH	F_traK	F_traL	F_traN	F_traU	F_traV	F_traW	F_trbC	G_ICEHIN1056_000310	G_ICEHIN1056_000410	G_ICEHIN1056_000440	G_ICEHIN1056_000510	G_ICEHIN1056_000520	I_traI	I_traK	I_traL	I_traM	I_traN	I_traP	I_traQ	I_traR	I_traW	I_traY
NC_013216	Desulfotomaculum_acetoxidans_DSM_771,_complete_genome._	Firmicutes;	FA	circular	4545624	4068	T4SS	NOMOB	O	T4SS_T4CP_NOMOB_O_493	2376	2413	virb4@DEAX001c01_024130&0.755037&1.4e-31	traU	t4cp1@DEAX001c01_023760&0.981818&6.5e-20	t4cp2@DEAX001c01_023760&0.986486&1.3e-41	t4cp3	MOBC	MOBF	MOBH	MOBPHEN	MOBQ	MOBV	MOBT	MOBB	F_traE	F_traH	F_traK	F_traL	F_traN	F_traU	F_traV	F_traW	F_trbC	G_ICEHIN1056_000310	G_ICEHIN1056_000410	G_ICEHIN1056_000440	G_ICEHIN1056_000510	G_ICEHIN1056_000520	I_traI	I_traK	I_traL	I_traM	I_traN	I_traP	I_traQ	I_traR	I_traW	I_traY
NC_013173	Desulfomicrobium_baculatum_DSM_4028,_complete_genome._	Proteobacteria;	Deltaproteobacteria	circular	3942657	3436	NOT4SS	MOB	O	NOT4SS_NOT4CP_MOB_O_496	1285	1285	virb4	traU	t4cp1	t4cp2	t4cp3	MOBC	MOBF	MOBH	MOBPHEN@DEBA001c01_012850&0.991416&1.5e-26	MOBQ	MOBV	MOBT	MOBB	F_traE	F_traH	F_traK	F_traL	F_traN	F_traU	F_traV	F_traW	F_trbC	G_ICEHIN1056_000310	G_ICEHIN1056_000410	G_ICEHIN1056_000440	G_ICEHIN1056_000510	G_ICEHIN1056_000520	I_traI	I_traK	I_traL	I_traM	I_traN	I_traP	I_traQ	I_traR	I_traW	I_traY
NC_011883	Desulfovibrio_desulfuricans_subsp._desulfuricans_str._ATCC_27774,_complete_genome._	Proteobacteria;	Deltaproteobacteria	circular	2873437	2356	NOT4SS	MOB	O	NOT4SS_NOT4CP_MOB_O_499	439	439	virb4	traU	t4cp1	t4cp2	t4cp3	MOBC	MOBF	MOBH	MOBPHEN	MOBQ	MOBV@DEDE002c01_004390&0.990196&1.9e-50	MOBT	MOBB	F_traE	F_traH	F_traK	F_traL	F_traN	F_traU	F_traV	F_traW	F_trbC	G_ICEHIN1056_000310	G_ICEHIN1056_000410	G_ICEHIN1056_000440	G_ICEHIN1056_000510	G_ICEHIN1056_000520	I_traI	I_traK	I_traL	I_traM	I_traN	I_traP	I_traQ	I_traR	I_traW	I_traY
NC_011883	Desulfovibrio_desulfuricans_subsp._desulfuricans_str._ATCC_27774,_complete_genome._	Proteobacteria;	Deltaproteobacteria	circular	2873437	2356	NOT4SS	MOB	O	NOT4SS_NOT4CP_MOB_O_500	1235	1235	virb4	traU	t4cp1	t4cp2	t4cp3	MOBC	MOBF	MOBH	MOBPHEN	MOBQ	MOBV@DEDE002c01_012350&0.97549&3.2e-45	MOBT	MOBB	F_traE	F_traH	F_traK	F_traL	F_traN	F_traU	F_traV	F_traW	F_trbC	G_ICEHIN1056_000310	G_ICEHIN1056_000410	G_ICEHIN1056_000440	G_ICEHIN1056_000510	G_ICEHIN1056_000520	I_traI	I_traK	I_traL	I_traM	I_traN	I_traP	I_traQ	I_traR	I_traW	I_traY
NC_007907	Desulfitobacterium_hafniense_Y51,_complete_genome._	Firmicutes;	Firmicutes	circular	5727534	5060	T4SS	NOMOB	O	T4SS_T4CP_NOMOB_O_504	31	41	virb4@DEHA001c01_000410&0.536585&2.2e-56	traU	t4cp1@DEHA001c01_000310&0.990909&2.8e-09	t4cp2@DEHA001c01_000310&0.968468&1.7e-45	t4cp3	MOBC	MOBF	MOBH	MOBPHEN	MOBQ	MOBV	MOBT	MOBB	F_traE	F_traH	F_traK	F_traL	F_traN	F_traU	F_traV	F_traW	F_trbC	G_ICEHIN1056_000310	G_ICEHIN1056_000410	G_ICEHIN1056_000440	G_ICEHIN1056_000510	G_ICEHIN1056_000520	I_traI	I_traK	I_traL	I_traM	I_traN	I_traP	I_traQ	I_traR	I_traW	I_traY
NC_007907	Desulfitobacterium_hafniense_Y51,_complete_genome._	Firmicutes;	Firmicutes	circular	5727534	5060	T4SS	NOMOB	O	T4SS_NOT4CP_NOMOB_O_506	4621	4621	virb4@DEHA001c01_046210&0.54719&2.9e-66	traU	t4cp1	t4cp2	t4cp3	MOBC	MOBF	MOBH	MOBPHEN	MOBQ	MOBV	MOBT	MOBB	F_traE	F_traH	F_traK	F_traL	F_traN	F_traU	F_traV	F_traW	F_trbC	G_ICEHIN1056_000310	G_ICEHIN1056_000410	G_ICEHIN1056_000440	G_ICEHIN1056_000510	G_ICEHIN1056_000520	I_traI	I_traK	I_traL	I_traM	I_traN	I_traP	I_traQ	I_traR	I_traW	I_traY
NC_007907	Desulfitobacterium_hafniense_Y51,_complete_genome._	Firmicutes;	Firmicutes	circular	5727534	5060	T4SS	NOMOB	O	T4SS_T4CP_NOMOB_O_507	4685	4721	virb4@DEHA001c01_047210&0.536585&1.6e-67	traU	t4cp1@DEHA001c01_047060&0.990909&2.9e-10	t4cp2@DEHA001c01_047060&0.972973&1.7e-45@DEHA001c01_046850&0.594595&3.6e-26	t4cp3	MOBC	MOBF	MOBH	MOBPHEN	MOBQ	MOBV	MOBT	MOBB	F_traE	F_traH	F_traK	F_traL	F_traN	F_traU	F_traV	F_traW	F_trbC	G_ICEHIN1056_000310	G_ICEHIN1056_000410	G_ICEHIN1056_000440	G_ICEHIN1056_000510	G_ICEHIN1056_000520	I_traI	I_traK	I_traL	I_traM	I_traN	I_traP	I_traQ	I_traR	I_traW	I_traY
NC_012796	Desulfovibrio_magneticus_RS-1,_complete_genome._	Proteobacteria;	Deltaproteobacteria	circular	5248049	4625	NOT4SS	MOB	O	NOT4SS_NOT4CP_MOB_O_511	728	728	virb4	traU	t4cp1	t4cp2	t4cp3	MOBC	MOBF	MOBH	MOBPHEN@DEMA001c01_007280&0.815451&4.7e-32	MOBQ	MOBV	MOBT	MOBB	F_traE	F_traH	F_traK	F_traL	F_traN	F_traU	F_traV	F_traW	F_trbC	G_ICEHIN1056_000310	G_ICEHIN1056_000410	G_ICEHIN1056_000440	G_ICEHIN1056_000510	G_ICEHIN1056_000520	I_traI	I_traK	I_traL	I_traM	I_traN	I_traP	I_traQ	I_traR	I_traW	I_traY
NC_012796	Desulfovibrio_magneticus_RS-1,_complete_genome._	Proteobacteria;	Deltaproteobacteria	circular	5248049	4625	NOT4SS	MOB	O	NOT4SS_NOT4CP_MOB_O_512	1469	1469	virb4	traU	t4cp1	t4cp2	t4cp3	MOBC	MOBF@DEMA001c01_014690&0.554545&1e-58&1.2e-15	MOBH	MOBPHEN	MOBQ@DEMA001c01_014690&0.940092&4e-32	MOBV	MOBT	MOBB	F_traE	F_traH	F_traK	F_traL	F_traN	F_traU	F_traV	F_traW	F_trbC	G_ICEHIN1056_000310	G_ICEHIN1056_000410	G_ICEHIN1056_000440	G_ICEHIN1056_000510	G_ICEHIN1056_000520	I_traI	I_traK	I_traL	I_traM	I_traN	I_traP	I_traQ	I_traR	I_traW	I_traY
NC_009253	Desulfotomaculum_reducens_MI-1,_complete_genome._	Firmicutes;	FA	circular	3608104	3276	T4SS	NOMOB	O	T4SS_T4CP_NOMOB_O_513A	823	872	virb4@DERE001c01_008230&0.554613&3.1e-30	traU	t4cp1@DERE001c01_008720&0.963636&1.2e-18	t4cp2@DERE001c01_008720&0.945946&7.6e-36	t4cp3	MOBC	MOBF	MOBH	MOBPHEN	MOBQ	MOBV	MOBT	MOBB	F_traE	F_traH	F_traK	F_traL	F_traN	F_traU	F_traV	F_traW	F_trbC	G_ICEHIN1056_000310	G_ICEHIN1056_000410	G_ICEHIN1056_000440	G_ICEHIN1056_000510	G_ICEHIN1056_000520	I_traI	I_traK	I_traL	I_traM	I_traN	I_traP	I_traQ	I_traR	I_traW	I_traY
NC_009253	Desulfotomaculum_reducens_MI-1,_complete_genome._	Firmicutes;	Firmicutes	circular	3608104	3276	T4SS	NOMOB	O	T4SS_T4CP_NOMOB_O_513B	916	1002	virb4@DERE001c01_009580&0.600212&1.7e-79	traU	t4cp1@DERE001c01_010020&0.981818&1.3e-14	t4cp2@DERE001c01_010020&0.986486&5.7e-40	t4cp3	MOBC	MOBF	MOBH	MOBPHEN	MOBQ	MOBV	MOBT	MOBB	F_traE	F_traH	F_traK	F_traL	F_traN	F_traU	F_traV	F_traW	F_trbC	G_ICEHIN1056_000310	G_ICEHIN1056_000410	G_ICEHIN1056_000440	G_ICEHIN1056_000510	G_ICEHIN1056_000520	I_traI	I_traK	I_traL@DERE001c01_009160&0.608974&6.9e-05	I_traM	I_traN	I_traP	I_traQ	I_traR	I_traW	I_traY
NC_012881	Desulfovibrio_salexigens_DSM_2638,_complete_genome._	Proteobacteria;	Deltaproteobacteria	circular	4289847	3807	T4SS	CONJ	T	T4SS_T4CP_MOB_T_515	1685	1722	virb4@DESA001c01_017210&0.826087&1.7e-194	traU	t4cp1@DESA001c01_017030&0.981818&3.8e-25	t4cp2@DESA001c01_017030&0.986486&2.8e-55	t4cp3	MOBC	MOBF	MOBH	MOBPHEN@DESA001c01_016850&0.944206&9e-35	MOBQ	MOBV	MOBT	MOBB	F_traE	F_traH	F_traK	F_traL	F_traN	F_traU	F_traV	F_traW	F_trbC	G_ICEHIN1056_000310	G_ICEHIN1056_000410	G_ICEHIN1056_000440	G_ICEHIN1056_000510	G_ICEHIN1056_000520	I_traI	I_traK	I_traL	I_traM	I_traN	I_traP	I_traQ	I_traR	I_traW	I_traY
NC_012880	Dickeya_dadantii_Ech703,_complete_genome._	Proteobacteria;	Gammaproteobacteria	circular	4679450	3970	NOT4SS	MOB	O	NOT4SS_NOT4CP_MOB_O_521	2959	2959	virb4	traU	t4cp1	t4cp2	t4cp3	MOBC	MOBF	MOBH	MOBPHEN@DIDA001c01_029590&0.914163&2.7e-26	MOBQ	MOBV	MOBT	MOBB	F_traE	F_traH	F_traK	F_traL	F_traN	F_traU	F_traV	F_traW	F_trbC	G_ICEHIN1056_000310	G_ICEHIN1056_000410	G_ICEHIN1056_000440	G_ICEHIN1056_000510	G_ICEHIN1056_000520	I_traI	I_traK	I_traL	I_traM	I_traN	I_traP	I_traQ	I_traR	I_traW	I_traY
NC_012880	Dickeya_dadantii_Ech703,_complete_genome._	Proteobacteria;	Gammaproteobacteria	circular	4679450	3970	NOT4SS	MOB	O	NOT4SS_NOT4CP_MOB_O_522	3056	3067	virb4	traU	t4cp1	t4cp2	t4cp3	MOBC@DIDA001c01_030560&1&9.9e-58	MOBF	MOBH@DIDA001c01_030670&0.921569&7.1e-18	MOBPHEN	MOBQ	MOBV	MOBT	MOBB	F_traE	F_traH	F_traK	F_traL	F_traN	F_traU	F_traV	F_traW	F_trbC	G_ICEHIN1056_000310	G_ICEHIN1056_000410	G_ICEHIN1056_000440	G_ICEHIN1056_000510	G_ICEHIN1056_000520	I_traI	I_traK	I_traL	I_traM	I_traN	I_traP	I_traQ	I_traR	I_traW	I_traY
NC_012880	Dickeya_dadantii_Ech703,_complete_genome._	Proteobacteria;	Gammaproteobacteria	circular	4679450	3970	NOT4SS	MOB	O	NOT4SS_NOT4CP_MOB_O_523	3429	3429	virb4	traU	t4cp1	t4cp2	t4cp3	MOBC@DIDA001c01_034290&1&2e-59	MOBF	MOBH	MOBPHEN	MOBQ	MOBV	MOBT	MOBB	F_traE	F_traH	F_traK	F_traL	F_traN	F_traU	F_traV	F_traW	F_trbC	G_ICEHIN1056_000310	G_ICEHIN1056_000410	G_ICEHIN1056_000440	G_ICEHIN1056_000510	G_ICEHIN1056_000520	I_traI	I_traK	I_traL	I_traM	I_traN	I_traP	I_traQ	I_traR	I_traW	I_traY
NC_013592	Dickeya_dadantii_Ech586,_complete_genome._	Proteobacteria;	Gammaproteobacteria	circular	4818394	4144	T4SS	CONJ	T	T4SS_T4CP_MOB_T_524	1453	1463	virb4@DIDA002c01_014630&0.878049&2.1e-202	traU	t4cp1@DIDA002c01_014540&0.954545&1.1e-05	t4cp2@DIDA002c01_014540&0.842342&9.2e-23	t4cp3	MOBC@DIDA002c01_014530&1&3e-65	MOBF	MOBH	MOBPHEN	MOBQ	MOBV	MOBT	MOBB	F_traE	F_traH	F_traK	F_traL	F_traN	F_traU	F_traV	F_traW	F_trbC	G_ICEHIN1056_000310	G_ICEHIN1056_000410	G_ICEHIN1056_000440	G_ICEHIN1056_000510	G_ICEHIN1056_000520	I_traI	I_traK	I_traL	I_traM	I_traN	I_traP	I_traQ	I_traR	I_traW	I_traY
NC_013592	Dickeya_dadantii_Ech586,_complete_genome._	Proteobacteria;	Gammaproteobacteria	circular	4818394	4144	T4SS	CONJ	T	T4SS_T4CP_MOB_T_526	2658	2673	virb4@DIDA002c01_026580&0.88017&2.6e-229	traU	t4cp1@DIDA002c01_026720&0.909091&7.5e-06	t4cp2@DIDA002c01_026720&0.842342&1.2e-21	t4cp3	MOBC@DIDA002c01_026730&1&6.8e-66	MOBF	MOBH	MOBPHEN	MOBQ	MOBV	MOBT	MOBB	F_traE	F_traH	F_traK	F_traL	F_traN	F_traU	F_traV	F_traW	F_trbC	G_ICEHIN1056_000310	G_ICEHIN1056_000410	G_ICEHIN1056_000440	G_ICEHIN1056_000510	G_ICEHIN1056_000520	I_traI	I_traK	I_traL	I_traM	I_traN	I_traP	I_traQ	I_traR	I_traW	I_traY
NC_011992	Diaphorobacter_sp._TPSY,_complete_genome._	Proteobacteria;	Betaproteobacteria	circular	3796573	3479	T4SS	NOMOB	O	T4SS_T4CP_NOMOB_O_530	1166	1182	virb4@DISP001c01_011660&0.516437&3.7e-45	traU	t4cp1	t4cp2@DISP001c01_011770&0.648649&9.6e-22	t4cp3	MOBC	MOBF	MOBH	MOBPHEN	MOBQ	MOBV	MOBT	MOBB	F_traE	F_traH	F_traK	F_traL	F_traN	F_traU	F_traV	F_traW	F_trbC	G_ICEHIN1056_000310@DISP001c01_011820&0.970297&1.2e-73	G_ICEHIN1056_000410@DISP001c01_011700&0.963801&6.3e-110	G_ICEHIN1056_000440@DISP001c01_011670&0.992754&3.8e-64	G_ICEHIN1056_000510	G_ICEHIN1056_000520	I_traI	I_traK	I_traL	I_traM	I_traN	I_traP	I_traQ	I_traR	I_traW	I_traY
NC_011992	Diaphorobacter_sp._TPSY,_complete_genome._	Proteobacteria;	Betaproteobacteria	circular	3796573	3479	T4SS	CONJ	T	T4SS_T4CP_MOB_T_531	1294	1325	virb4@DISP001c01_013200&0.817603&1.4e-179	traU	t4cp1@DISP001c01_013170&1&2.3e-24	t4cp2@DISP001c01_013170&0.783784&3.5e-45	t4cp3	MOBC	MOBF	MOBH	MOBPHEN@DISP001c01_012940&0.742489&7.7e-27	MOBQ	MOBV	MOBT	MOBB	F_traE	F_traH	F_traK	F_traL	F_traN	F_traU	F_traV	F_traW	F_trbC	G_ICEHIN1056_000310	G_ICEHIN1056_000410	G_ICEHIN1056_000440	G_ICEHIN1056_000510	G_ICEHIN1056_000520	I_traI	I_traK	I_traL	I_traM	I_traN	I_traP	I_traQ	I_traR	I_traW	I_traY
NC_011992	Diaphorobacter_sp._TPSY,_complete_genome._	Proteobacteria;	Betaproteobacteria	circular	3796573	3479	NOT4SS	MOB	O	NOT4SS_T4CP_MOB_O_532	1564	1567	virb4	traU	t4cp1@DISP001c01_015640&0.990909&1.8e-10	t4cp2@DISP001c01_015640&0.941441&5.5e-38	t4cp3	MOBC	MOBF@DISP001c01_015670&0.996591&1e-152	MOBH	MOBPHEN	MOBQ	MOBV	MOBT	MOBB	F_traE	F_traH	F_traK	F_traL	F_traN	F_traU	F_traV	F_traW	F_trbC	G_ICEHIN1056_000310	G_ICEHIN1056_000410	G_ICEHIN1056_000440	G_ICEHIN1056_000510	G_ICEHIN1056_000520	I_traI	I_traK	I_traL	I_traM	I_traN	I_traP	I_traQ	I_traR	I_traW	I_traY
NC_011992	Diaphorobacter_sp._TPSY,_complete_genome._	Proteobacteria;	Betaproteobacteria	circular	3796573	3479	T4SS	CONJ	T	T4SS_T4CP_MOB_T_534	3499	3521	virb4@DISP001c01_035040&0.801697&2.8e-181	traU	t4cp1@DISP001c01_035090&1&1.1e-24	t4cp2@DISP001c01_035090&1&2.6e-55	t4cp3	MOBC	MOBF	MOBH	MOBPHEN@DISP001c01_035210&0.729614&1.7e-24	MOBQ	MOBV	MOBT	MOBB	F_traE	F_traH	F_traK	F_traL	F_traN	F_traU	F_traV	F_traW	F_trbC	G_ICEHIN1056_000310	G_ICEHIN1056_000410	G_ICEHIN1056_000440	G_ICEHIN1056_000510	G_ICEHIN1056_000520	I_traI	I_traK	I_traL	I_traM	I_traN	I_traP	I_traQ	I_traR	I_traW	I_traY
NC_012912	Dickeya_zeae_Ech1591,_complete_genome._	Proteobacteria;	Gammaproteobacteria	circular	4813854	4163	T4SS	CONJ	G	T4SS_T4CP_MOB_G_535	436	464	virb4@DIZE001c01_004460&0.821845&1.4e-93	traU	t4cp1@DIZE001c01_004590&0.990909&1.7e-10	t4cp2@DIZE001c01_004590&0.936937&1.1e-30	t4cp3	MOBC	MOBF	MOBH@DIZE001c01_004360&0.926471&1e-42	MOBPHEN	MOBQ	MOBV	MOBT	MOBB	F_traE	F_traH	F_traK	F_traL	F_traN	F_traU	F_traV	F_traW	F_trbC	G_ICEHIN1056_000310@DIZE001c01_004640&0.881188&1.9e-64	G_ICEHIN1056_000410@DIZE001c01_004500&0.959276&5.8e-103	G_ICEHIN1056_000440@DIZE001c01_004470&0.992754&2.3e-61	G_ICEHIN1056_000510@DIZE001c01_004410&0.973742&1.5e-197	G_ICEHIN1056_000520@DIZE001c01_004420&0.963746&9.2e-144	I_traI	I_traK	I_traL	I_traM	I_traN	I_traP	I_traQ	I_traR	I_traW	I_traY
NC_012912	Dickeya_zeae_Ech1591,_complete_genome._	Proteobacteria;	Gammaproteobacteria	circular	4813854	4163	T4SS	CONJ	T	T4SS_T4CP_MOB_T_537	1485	1496	virb4@DIZE001c01_014960&0.878049&2.2e-202	traU	t4cp1@DIZE001c01_014860&0.909091&4e-07	t4cp2@DIZE001c01_014860&0.878378&7.5e-26	t4cp3	MOBC@DIZE001c01_014850&1&2.9e-66	MOBF	MOBH	MOBPHEN	MOBQ	MOBV	MOBT	MOBB	F_traE	F_traH	F_traK	F_traL	F_traN	F_traU	F_traV	F_traW	F_trbC	G_ICEHIN1056_000310	G_ICEHIN1056_000410	G_ICEHIN1056_000440	G_ICEHIN1056_000510	G_ICEHIN1056_000520	I_traI	I_traK	I_traL	I_traM	I_traN	I_traP	I_traQ	I_traR	I_traW	I_traY
NC_012912	Dickeya_zeae_Ech1591,_complete_genome._	Proteobacteria;	Gammaproteobacteria	circular	4813854	4163	NOT4SS	MOB	O	NOT4SS_NOT4CP_MOB_O_539	3535	3535	virb4	traU	t4cp1	t4cp2	t4cp3	MOBC@DIZE001c01_035350&1&2.3e-63	MOBF	MOBH	MOBPHEN	MOBQ	MOBV	MOBT	MOBB	F_traE	F_traH	F_traK	F_traL	F_traN	F_traU	F_traV	F_traW	F_trbC	G_ICEHIN1056_000310	G_ICEHIN1056_000410	G_ICEHIN1056_000440	G_ICEHIN1056_000510	G_ICEHIN1056_000520	I_traI	I_traK	I_traL	I_traM	I_traN	I_traP	I_traQ	I_traR	I_traW	I_traY
NC_013037	Dyadobacter_fermentans_DSM_18053,_complete_genome._	Bacteroidetes;	Bacteroidetes	circular	6967790	5719	NOT4SS	MOB	O	NOT4SS_NOT4CP_MOB_O_540	4162	4162	virb4	traU	t4cp1	t4cp2	t4cp3	MOBC	MOBF	MOBH	MOBPHEN@DYFE001c01_041620&0.742489&1.2e-19	MOBQ	MOBV	MOBT	MOBB	F_traE	F_traH	F_traK	F_traL	F_traN	F_traU	F_traV	F_traW	F_trbC	G_ICEHIN1056_000310	G_ICEHIN1056_000410	G_ICEHIN1056_000440	G_ICEHIN1056_000510	G_ICEHIN1056_000520	I_traI	I_traK	I_traL	I_traM	I_traN	I_traP	I_traQ	I_traR	I_traW	I_traY
NC_013037	Dyadobacter_fermentans_DSM_18053,_complete_genome._	Bacteroidetes;	Bacteroidetes	circular	6967790	5719	NOT4SS	MOB	O	NOT4SS_NOT4CP_MOB_O_542	5137	5137	virb4	traU	t4cp1	t4cp2	t4cp3	MOBC	MOBF	MOBH	MOBPHEN@DYFE001c01_051370&0.918455&2.7e-24	MOBQ	MOBV	MOBT	MOBB	F_traE	F_traH	F_traK	F_traL	F_traN	F_traU	F_traV	F_traW	F_trbC	G_ICEHIN1056_000310	G_ICEHIN1056_000410	G_ICEHIN1056_000440	G_ICEHIN1056_000510	G_ICEHIN1056_000520	I_traI	I_traK	I_traL	I_traM	I_traN	I_traP	I_traQ	I_traR	I_traW	I_traY
NC_013037	Dyadobacter_fermentans_DSM_18053,_complete_genome._	Bacteroidetes;	Bacteroidetes	circular	6967790	5719	NOT4SS	MOB	O	NOT4SS_NOT4CP_MOB_O_543	5201	5201	virb4	traU	t4cp1	t4cp2	t4cp3	MOBC	MOBF	MOBH	MOBPHEN@DYFE001c01_052010&0.776824&1e-30	MOBQ	MOBV	MOBT	MOBB	F_traE	F_traH	F_traK	F_traL	F_traN	F_traU	F_traV	F_traW	F_trbC	G_ICEHIN1056_000310	G_ICEHIN1056_000410	G_ICEHIN1056_000440	G_ICEHIN1056_000510	G_ICEHIN1056_000520	I_traI	I_traK	I_traL	I_traM	I_traN	I_traP	I_traQ	I_traR	I_traW	I_traY
NC_012779	Edwardsiella_ictaluri_93-146,_complete_genome._	Proteobacteria;	Gammaproteobacteria	circular	3812315	3783	T4SS	CONJ	G	T4SS_T4CP_MOB_G_544	325	364	virb4@EDIC001c01_003420&0.829268&5.8e-85	traU	t4cp1@EDIC001c01_003310&0.990909&5.6e-12	t4cp2@EDIC001c01_003310&0.968468&5.7e-34	t4cp3	MOBC	MOBF	MOBH@EDIC001c01_003640&0.931373&3.3e-18	MOBPHEN	MOBQ	MOBV	MOBT	MOBB	F_traE	F_traH	F_traK	F_traL	F_traN	F_traU	F_traV	F_traW	F_trbC	G_ICEHIN1056_000310@EDIC001c01_003250&0.792079&3.3e-61	G_ICEHIN1056_000410@EDIC001c01_003380&0.950226&9.3e-102	G_ICEHIN1056_000440@EDIC001c01_003410&0.572464&4.3e-37	G_ICEHIN1056_000510@EDIC001c01_003490&0.912473&1e-174	G_ICEHIN1056_000520@EDIC001c01_003480&0.969789&1.2e-131	I_traI	I_traK	I_traL	I_traM	I_traN	I_traP	I_traQ	I_traR	I_traW	I_traY
NC_013204	Eggerthella_lenta_DSM_2243,_complete_genome._	Actinobacteria;	Actinobacteria	circular	3632260	3070	T4SS	CONJ	O	T4SS_T4CP_MOB_O_549	781	832	virb4@EGLE001c01_007840&0.787911&1.3e-94	traU	t4cp1@EGLE001c01_007810&0.990909&1.2e-15	t4cp2@EGLE001c01_007810&0.981982&2.6e-46	t4cp3	MOBC	MOBF	MOBH	MOBPHEN@EGLE001c01_008320&0.901288&1.4e-30	MOBQ	MOBV	MOBT	MOBB	F_traE	F_traH	F_traK	F_traL	F_traN	F_traU	F_traV	F_traW	F_trbC	G_ICEHIN1056_000310	G_ICEHIN1056_000410	G_ICEHIN1056_000440	G_ICEHIN1056_000510	G_ICEHIN1056_000520	I_traI	I_traK	I_traL	I_traM	I_traN	I_traP	I_traQ	I_traR	I_traW	I_traY
NC_013204	Eggerthella_lenta_DSM_2243,_complete_genome._	Actinobacteria;	Actinobacteria	circular	3632260	3070	T4SS	CONJ	O	T4SS_T4CP_MOB_O_550	906	924	virb4@EGLE001c01_009060&0.808059&7.4e-93	traU	t4cp1@EGLE001c01_009100&0.981818&4.7e-15	t4cp2@EGLE001c01_009100&0.986486&9.4e-40	t4cp3	MOBC	MOBF	MOBH	MOBPHEN@EGLE001c01_009240&0.875536&3.9e-23	MOBQ	MOBV	MOBT	MOBB	F_traE	F_traH	F_traK	F_traL	F_traN	F_traU	F_traV	F_traW	F_trbC	G_ICEHIN1056_000310	G_ICEHIN1056_000410	G_ICEHIN1056_000440	G_ICEHIN1056_000510	G_ICEHIN1056_000520	I_traI	I_traK	I_traL	I_traM	I_traN	I_traP	I_traQ	I_traR	I_traW	I_traY
NC_013204	Eggerthella_lenta_DSM_2243,_complete_genome._	Actinobacteria;	Actinobacteria	circular	3632260	3070	T4SS	CONJ	O	T4SS_T4CP_MOB_O_551	1497	1516	virb4@EGLE001c01_015000&0.817603&9.4e-92	traU	t4cp1@EGLE001c01_014970&1&4.2e-17	t4cp2@EGLE001c01_014970&0.977477&1.7e-48	t4cp3	MOBC	MOBF	MOBH	MOBPHEN@EGLE001c01_015160&0.892704&2.2e-18	MOBQ	MOBV	MOBT	MOBB	F_traE	F_traH	F_traK	F_traL	F_traN	F_traU	F_traV	F_traW	F_trbC	G_ICEHIN1056_000310	G_ICEHIN1056_000410	G_ICEHIN1056_000440	G_ICEHIN1056_000510	G_ICEHIN1056_000520	I_traI	I_traK	I_traL	I_traM	I_traN	I_traP	I_traQ	I_traR	I_traW	I_traY
NC_007354	Ehrlichia_canis_str._Jake,_complete_genome._	Proteobacteria;	Alphaproteobacteria	circular	1315030	925	T4SS	NOMOB	T	T4SS_T4CP_NOMOB_O_553_554_555_556	20	857	virb4@EHCA001c01_008570&0.803818&1.8e-85@EHCA001c01_005480&0.818664&1.5e-201	traU	t4cp1@EHCA001c01_000200&0.990909&3.3e-28	t4cp2@EHCA001c01_000200&1&1e-53	t4cp3	MOBC	MOBF	MOBH	MOBPHEN	MOBQ	MOBV	MOBT	MOBB	F_traE	F_traH	F_traK	F_traL	F_traN	F_traU	F_traV	F_traW	F_trbC	G_ICEHIN1056_000310	G_ICEHIN1056_000410	G_ICEHIN1056_000440	G_ICEHIN1056_000510	G_ICEHIN1056_000520	I_traI	I_traK	I_traL	I_traM	I_traN	I_traP	I_traQ	I_traR	I_traW	I_traY
NC_007799	Ehrlichia_chaffeensis_str._Arkansas,_complete_genome._	Proteobacteria;	Alphaproteobacteria	circular	1176248	1105	T4SS	NOMOB	T	T4SS_T4CP_NOMOB_O_557_558_559_560_561	39	1030	virb4@EHCH001c01_010300&0.825027&2.1e-88@EHCH001c01_004930&0.820785&5.7e-202	traU	t4cp1@EHCH001c01_000390&0.990909&3e-28	t4cp2@EHCH001c01_000390&1&9.9e-54	t4cp3	MOBC	MOBF	MOBH	MOBPHEN	MOBQ	MOBV	MOBT	MOBB	F_traE	F_traH	F_traK	F_traL	F_traN	F_traU	F_traV	F_traW	F_trbC	G_ICEHIN1056_000310	G_ICEHIN1056_000410	G_ICEHIN1056_000440	G_ICEHIN1056_000510	G_ICEHIN1056_000520	I_traI	I_traK	I_traL	I_traM	I_traN	I_traP	I_traQ	I_traR	I_traW	I_traY
NC_005295	Ehrlichia_ruminantium_str._Welgevonden,_complete_genome._	Proteobacteria;	Alphaproteobacteria	circular	1516355	888	T4SS	NOMOB	T	T4SS_T4CP_NOMOB_O_562_563_564_565	27	832	virb4@EHRU001c01_008320&0.803818&1.2e-84@EHRU001c01_005510&0.818664&9.1e-203	traU	t4cp1@EHRU001c01_000270&0.990909&3.4e-28	t4cp2@EHRU001c01_000270&1&5.8e-54	t4cp3	MOBC	MOBF	MOBH	MOBPHEN	MOBQ	MOBV	MOBT	MOBB	F_traE	F_traH	F_traK	F_traL	F_traN	F_traU	F_traV	F_traW	F_trbC	G_ICEHIN1056_000310	G_ICEHIN1056_000410	G_ICEHIN1056_000440	G_ICEHIN1056_000510	G_ICEHIN1056_000520	I_traI	I_traK	I_traL	I_traM	I_traN	I_traP	I_traQ	I_traR	I_traW	I_traY
NC_006831	Ehrlichia_ruminantium_str._Gardel,_complete_genome._	Proteobacteria;	Alphaproteobacteria	circular	1499920	950	T4SS	NOMOB	T	T4SS_T4CP_NOMOB_O_566_567_568_569	13	871	virb4@EHRU002c01_005680&0.819724&1.2e-202@EHRU002c01_008710&0.803818&1.3e-83	traU	t4cp1@EHRU002c01_000130&0.990909&3.4e-28	t4cp2@EHRU002c01_000130&1&5.8e-54	t4cp3	MOBC	MOBF	MOBH	MOBPHEN	MOBQ	MOBV	MOBT	MOBB	F_traE	F_traH	F_traK	F_traL	F_traN	F_traU	F_traV	F_traW	F_trbC	G_ICEHIN1056_000310	G_ICEHIN1056_000410	G_ICEHIN1056_000440	G_ICEHIN1056_000510	G_ICEHIN1056_000520	I_traI	I_traK	I_traL	I_traM	I_traN	I_traP	I_traQ	I_traR	I_traW	I_traY
NC_006832	Ehrlichia_ruminantium_str._Welgevonden,_complete_genome._	Proteobacteria;	Alphaproteobacteria	circular	1512977	958	T4SS	NOMOB	T	T4SS_T4CP_NOMOB_O_570_571_572_573	13	880	virb4@EHRU003c01_005790&0.819724&9e-203@EHRU003c01_008800&0.803818&1.2e-84	traU	t4cp1@EHRU003c01_000130&0.990909&3.4e-28	t4cp2@EHRU003c01_000130&1&5.8e-54	t4cp3	MOBC	MOBF	MOBH	MOBPHEN	MOBQ	MOBV	MOBT	MOBB	F_traE	F_traH	F_traK	F_traL	F_traN	F_traU	F_traV	F_traW	F_trbC	G_ICEHIN1056_000310	G_ICEHIN1056_000410	G_ICEHIN1056_000440	G_ICEHIN1056_000510	G_ICEHIN1056_000520	I_traI	I_traK	I_traL	I_traM	I_traN	I_traP	I_traQ	I_traR	I_traW	I_traY
NC_014121	Enterobacter_cloacae_subsp._cloacae_ATCC_13047_chromosome,_complete_genome._	Proteobacteria;	Gammaproteobacteria	circular	5314581	5120	T4SS	CONJ	G	T4SS_T4CP_NOMOB_G_574_O_575	427	544	virb4@ENCL001c01_004570&0.806999&1.6e-80	traU	t4cp1@ENCL001c01_004470&0.990909&2.2e-11	t4cp2@ENCL001c01_004470&0.95045&2.2e-28	t4cp3	MOBC	MOBF	MOBH@ENCL001c01_005440&0.568627&5.6e-13	MOBPHEN	MOBQ	MOBV	MOBT	MOBB	F_traE	F_traH	F_traK@ENCL001c01_004540&0.514388&0.00049	F_traL	F_traN	F_traU	F_traV	F_traW	F_trbC	G_ICEHIN1056_000310@ENCL001c01_004270&0.80198&6.2e-75	G_ICEHIN1056_000410@ENCL001c01_004530&0.959276&9.1e-103	G_ICEHIN1056_000440@ENCL001c01_004560&0.927536&3.4e-56	G_ICEHIN1056_000510@ENCL001c01_004630&0.982495&1.4e-181	G_ICEHIN1056_000520@ENCL001c01_004620&0.97281&6.1e-135	I_traI	I_traK	I_traL	I_traM	I_traN	I_traP@ENCL001c01_004400&0.677824&8.9e-05	I_traQ	I_traR	I_traW	I_traY
NC_004668	Enterococcus_faecalis_V583,_complete_genome._	Firmicutes;	FA	circular	3218031	3113	T4SS	CONJ	O	T4SS_T4CP_MOB_O_578	129	147	virb4@ENFA001c01_001470&0.693531&6.6e-24	traU	t4cp1	t4cp2	t4cp3@ENFA001c01_001290&0.969828&1.4e-90	MOBC	MOBF	MOBH	MOBPHEN	MOBQ	MOBV	MOBT@ENFA001c01_001330&0.994536&3.2e-125	MOBB	F_traE	F_traH	F_traK	F_traL	F_traN	F_traU	F_traV	F_traW	F_trbC	G_ICEHIN1056_000310	G_ICEHIN1056_000410	G_ICEHIN1056_000440	G_ICEHIN1056_000510	G_ICEHIN1056_000520	I_traI	I_traK	I_traL	I_traM	I_traN	I_traP	I_traQ	I_traR	I_traW	I_traY
NC_004668	Enterococcus_faecalis_V583,_complete_genome._	Firmicutes;	Firmicutes	circular	3218031	3113	T4SS	CONJ	O	T4SS_T4CP_MOB_O_579	497	502	virb4@ENFA001c01_004970&0.776246&2.3e-25	traU	t4cp1	t4cp2@ENFA001c01_005000&0.927928&3.5e-33	t4cp3	MOBC@ENFA001c01_005020&0.976303&1.5e-37	MOBF	MOBH	MOBPHEN	MOBQ	MOBV	MOBT	MOBB	F_traE	F_traH	F_traK	F_traL	F_traN	F_traU	F_traV	F_traW	F_trbC	G_ICEHIN1056_000310	G_ICEHIN1056_000410	G_ICEHIN1056_000440	G_ICEHIN1056_000510	G_ICEHIN1056_000520	I_traI	I_traK	I_traL	I_traM	I_traN	I_traP	I_traQ	I_traR	I_traW	I_traY
NC_004668	Enterococcus_faecalis_V583,_complete_genome._	Firmicutes;	FA	circular	3218031	3113	T4SS	CONJ	O	T4SS_T4CP_MOB_O_581	1802	1815	virb4@ENFA001c01_018020&0.724284&1e-24	traU	t4cp1	t4cp2	t4cp3@ENFA001c01_018150&0.704741&5.9e-153	MOBC	MOBF	MOBH	MOBPHEN	MOBQ	MOBV	MOBT@ENFA001c01_018100&0.997268&1.9e-155	MOBB	F_traE	F_traH	F_traK	F_traL	F_traN	F_traU	F_traV	F_traW	F_trbC	G_ICEHIN1056_000310	G_ICEHIN1056_000410	G_ICEHIN1056_000440	G_ICEHIN1056_000510	G_ICEHIN1056_000520	I_traI	I_traK	I_traL	I_traM	I_traN	I_traP	I_traQ	I_traR	I_traW	I_traY
NC_004668	Enterococcus_faecalis_V583,_complete_genome._	Firmicutes;	FA	circular	3218031	3113	T4SS	CONJ	O	T4SS_T4CP_MOB_O_582A	2183	2244	virb4@ENFA001c01_021830&0.724284&5.8e-25	traU	t4cp1	t4cp2	t4cp3@ENFA001c01_022440&0.954741&8.8e-223	MOBC	MOBF	MOBH	MOBPHEN	MOBQ	MOBV	MOBT@ENFA001c01_022390&0.997268&2.4e-152	MOBB	F_traE	F_traH	F_traK	F_traL	F_traN	F_traU	F_traV	F_traW	F_trbC	G_ICEHIN1056_000310	G_ICEHIN1056_000410	G_ICEHIN1056_000440	G_ICEHIN1056_000510	G_ICEHIN1056_000520	I_traI	I_traK	I_traL	I_traM	I_traN	I_traP	I_traQ	I_traR	I_traW	I_traY
NC_004668	Enterococcus_faecalis_V583,_complete_genome._	Firmicutes;	Firmicutes	circular	3218031	3113	T4SS	CONJ	O	T4SS_T4CP_MOB_O_582B	2205	2239	virb4@ENFA001c01_022220&0.834571&3.4e-94	traU	t4cp1@ENFA001c01_022290&1&8.9e-17	t4cp2@ENFA001c01_022290&0.968468&1.7e-41	t4cp3	MOBC	MOBF	MOBH	MOBPHEN@ENFA001c01_022050&0.879828&1.8e-28	MOBQ	MOBV	MOBT	MOBB	F_traE	F_traH	F_traK	F_traL	F_traN	F_traU	F_traV	F_traW	F_trbC	G_ICEHIN1056_000310	G_ICEHIN1056_000410	G_ICEHIN1056_000440	G_ICEHIN1056_000510	G_ICEHIN1056_000520	I_traI	I_traK	I_traL	I_traM	I_traN	I_traP	I_traQ	I_traR	I_traW	I_traY
NC_004668	Enterococcus_faecalis_V583,_complete_genome._	Firmicutes;	FA	circular	3218031	3113	T4SS	CONJ	O	T4SS_T4CP_MOB_O_583	2406	2422	virb4@ENFA001c01_024060&0.569459&1.3e-23	traU	t4cp1	t4cp2	t4cp3@ENFA001c01_024220&0.987069&8.6e-94	MOBC	MOBF	MOBH	MOBPHEN	MOBQ	MOBV	MOBT@ENFA001c01_024170&0.997268&2.5e-124	MOBB	F_traE	F_traH	F_traK	F_traL	F_traN	F_traU	F_traV	F_traW	F_trbC	G_ICEHIN1056_000310	G_ICEHIN1056_000410	G_ICEHIN1056_000440	G_ICEHIN1056_000510	G_ICEHIN1056_000520	I_traI	I_traK	I_traL	I_traM	I_traN	I_traP	I_traQ	I_traR	I_traW	I_traY
NC_009436	Enterobacter_sp._638,_complete_genome._	Proteobacteria;	Gammaproteobacteria	circular	4518712	4115	NOT4SS	MOB	O	NOT4SS_NOT4CP_MOB_O_585	2929	2929	virb4	traU	t4cp1	t4cp2	t4cp3	MOBC	MOBF	MOBH	MOBPHEN@ENSP001c01_029290&0.871245&2.3e-23	MOBQ	MOBV	MOBT	MOBB	F_traE	F_traH	F_traK	F_traL	F_traN	F_traU	F_traV	F_traW	F_trbC	G_ICEHIN1056_000310	G_ICEHIN1056_000410	G_ICEHIN1056_000440	G_ICEHIN1056_000510	G_ICEHIN1056_000520	I_traI	I_traK	I_traL	I_traM	I_traN	I_traP	I_traQ	I_traR	I_traW	I_traY
NC_013971	Erwinia_amylovora_ATCC_49946,_complete_genome._	Proteobacteria;	Gammaproteobacteria	circular	3805874	3437	NOT4SS	MOB	O	NOT4SS_NOT4CP_MOB_O_588	61	61	virb4	traU	t4cp1	t4cp2	t4cp3	MOBC	MOBF	MOBH	MOBPHEN@ERAM001c01_000610&0.660944&6.1e-19	MOBQ	MOBV	MOBT	MOBB	F_traE	F_traH	F_traK	F_traL	F_traN	F_traU	F_traV	F_traW	F_trbC	G_ICEHIN1056_000310	G_ICEHIN1056_000410	G_ICEHIN1056_000440	G_ICEHIN1056_000510	G_ICEHIN1056_000520	I_traI	I_traK	I_traL	I_traM	I_traN	I_traP	I_traQ	I_traR	I_traW	I_traY
NC_004547	Erwinia_carotovora_subsp._atroseptica_SCRI1043,_complete_genome._	Proteobacteria;	Gammaproteobacteria	circular	5064019	4472	T4SS	CONJ	G	T4SS_T4CP_MOB_G_593	537	618	virb4@ERCA001c01_005770&0.839873&1.2e-84	traU	t4cp1@ERCA001c01_005640&0.990909&3.9e-12	t4cp2@ERCA001c01_005640&0.968468&9.5e-33	t4cp3	MOBC	MOBF	MOBH@ERCA001c01_006180&0.539216&6.8e-11	MOBPHEN	MOBQ	MOBV	MOBT	MOBB	F_traE	F_traH	F_traK	F_traL	F_traN	F_traU	F_traV	F_traW	F_trbC	G_ICEHIN1056_000310@ERCA001c01_005370&0.945545&7.4e-84	G_ICEHIN1056_000410@ERCA001c01_005720&0.959276&2.7e-103	G_ICEHIN1056_000440@ERCA001c01_005760&0.949275&1.2e-55	G_ICEHIN1056_000510@ERCA001c01_005820&0.986871&1.1e-180	G_ICEHIN1056_000520@ERCA001c01_005810&0.978852&2.3e-135	I_traI	I_traK	I_traL	I_traM	I_traN	I_traP	I_traQ	I_traR	I_traW	I_traY
NC_004547	Erwinia_carotovora_subsp._atroseptica_SCRI1043,_complete_genome._	Proteobacteria;	Gammaproteobacteria	circular	5064019	4472	NOT4SS	MOB	O	NOT4SS_NOT4CP_MOB_O_594	1072	1072	virb4	traU	t4cp1	t4cp2	t4cp3	MOBC	MOBF	MOBH	MOBPHEN@ERCA001c01_010720&0.682403&4.7e-23	MOBQ	MOBV	MOBT	MOBB	F_traE	F_traH	F_traK	F_traL	F_traN	F_traU	F_traV	F_traW	F_trbC	G_ICEHIN1056_000310	G_ICEHIN1056_000410	G_ICEHIN1056_000440	G_ICEHIN1056_000510	G_ICEHIN1056_000520	I_traI	I_traK	I_traL	I_traM	I_traN	I_traP	I_traQ	I_traR	I_traW	I_traY
NC_004547	Erwinia_carotovora_subsp._atroseptica_SCRI1043,_complete_genome._	Proteobacteria;	Gammaproteobacteria	circular	5064019	4472	T4SS	CONJ	T	T4SS_T4CP_MOB_T_595	1618	1668	virb4@ERCA001c01_016310&0.875928&3.1e-210	traU	t4cp1@ERCA001c01_016190&0.909091&1.3e-05	t4cp2@ERCA001c01_016190&0.837838&1.5e-19	t4cp3	MOBC@ERCA001c01_016180&1&4.5e-65	MOBF	MOBH	MOBPHEN	MOBQ@ERCA001c01_016680&0.976959&5e-68	MOBV	MOBT	MOBB	F_traE	F_traH	F_traK	F_traL	F_traN	F_traU	F_traV	F_traW	F_trbC	G_ICEHIN1056_000310	G_ICEHIN1056_000410	G_ICEHIN1056_000440	G_ICEHIN1056_000510	G_ICEHIN1056_000520	I_traI	I_traK	I_traL	I_traM	I_traN	I_traP	I_traQ	I_traR	I_traW	I_traY
NC_004547	Erwinia_carotovora_subsp._atroseptica_SCRI1043,_complete_genome._	Proteobacteria;	Gammaproteobacteria	circular	5064019	4472	NOT4SS	MOB	O	NOT4SS_NOT4CP_MOB_O_596	2912	2912	virb4	traU	t4cp1	t4cp2	t4cp3	MOBC	MOBF	MOBH	MOBPHEN	MOBQ@ERCA001c01_029120&0.976959&9.8e-66	MOBV	MOBT	MOBB	F_traE	F_traH	F_traK	F_traL	F_traN	F_traU	F_traV	F_traW	F_trbC	G_ICEHIN1056_000310	G_ICEHIN1056_000410	G_ICEHIN1056_000440	G_ICEHIN1056_000510	G_ICEHIN1056_000520	I_traI	I_traK	I_traL	I_traM	I_traN	I_traP	I_traQ	I_traR	I_traW	I_traY
NC_007722	Erythrobacter_litoralis_HTCC2594,_complete_genome._	Proteobacteria;	Alphaproteobacteria	circular	3052398	3011	T4SS	CONJ	F	T4SS_T4CP_MOB_F_597	159	188	virb4@ERLI001c01_001820&0.80912&5.3e-125	traU	t4cp1@ERLI001c01_001590&0.981818&7.4e-12	t4cp2@ERLI001c01_001590&0.837838&3e-34	t4cp3	MOBC	MOBF@ERLI001c01_001600&1&1e-212	MOBH	MOBPHEN	MOBQ	MOBV	MOBT	MOBB	F_traE@ERLI001c01_001870&0.979275&8.7e-34	F_traH@ERLI001c01_001730&0.976139&7.2e-113	F_traK@ERLI001c01_001860&0.902878&2.4e-28	F_traL@ERLI001c01_001880&0.92&2.3e-26	F_traN@ERLI001c01_001750&0.783206&0.001&1.4e-99	F_traU@ERLI001c01_001770&0.976048&3.5e-122	F_traV	F_traW@ERLI001c01_001780&0.95283&1.3e-68	F_trbC@ERLI001c01_001760&0.930131&1.8e-41	G_ICEHIN1056_000310	G_ICEHIN1056_000410	G_ICEHIN1056_000440	G_ICEHIN1056_000510	G_ICEHIN1056_000520	I_traI	I_traK	I_traL	I_traM	I_traN	I_traP	I_traQ	I_traR	I_traW	I_traY
NC_007722	Erythrobacter_litoralis_HTCC2594,_complete_genome._	Proteobacteria;	Alphaproteobacteria	circular	3052398	3011	T4SS	NOMOB	T	T4SS_NOT4CP_NOMOB_T_598	655	658	virb4@ERLI001c01_006560&0.823966&1.8e-197	traU	t4cp1	t4cp2	t4cp3	MOBC	MOBF	MOBH	MOBPHEN	MOBQ	MOBV	MOBT	MOBB	F_traE	F_traH	F_traK	F_traL	F_traN	F_traU	F_traV	F_traW	F_trbC	G_ICEHIN1056_000310	G_ICEHIN1056_000410	G_ICEHIN1056_000440	G_ICEHIN1056_000510	G_ICEHIN1056_000520	I_traI	I_traK	I_traL	I_traM	I_traN	I_traP	I_traQ	I_traR	I_traW	I_traY
NC_007722	Erythrobacter_litoralis_HTCC2594,_complete_genome._	Proteobacteria;	Alphaproteobacteria	circular	3052398	3011	T4SS	CONJ	F	T4SS_T4CP_MOB_F_599	859	890	virb4@ERLI001c01_008840&0.806999&3.2e-126	traU	t4cp1@ERLI001c01_008590&0.981818&3.9e-12	t4cp2@ERLI001c01_008590&0.842342&7.1e-35	t4cp3	MOBC	MOBF@ERLI001c01_008600&0.997727&2.9e-207	MOBH	MOBPHEN	MOBQ	MOBV	MOBT	MOBB	F_traE@ERLI001c01_008890&0.979275&2.4e-33	F_traH@ERLI001c01_008750&0.976139&3.3e-112	F_traK@ERLI001c01_008880&0.884892&8.3e-24	F_traL@ERLI001c01_008900&0.92&2e-26	F_traN@ERLI001c01_008770&0.68855&6.5e-05&6.2e-99	F_traU@ERLI001c01_008790&0.976048&2.8e-122	F_traV	F_traW@ERLI001c01_008800&0.933962&5.5e-69	F_trbC@ERLI001c01_008780&0.851528&5.8e-39	G_ICEHIN1056_000310	G_ICEHIN1056_000410	G_ICEHIN1056_000440	G_ICEHIN1056_000510	G_ICEHIN1056_000520	I_traI	I_traK	I_traL	I_traM	I_traN	I_traP	I_traQ	I_traR	I_traW	I_traY
NC_007722	Erythrobacter_litoralis_HTCC2594,_complete_genome._	Proteobacteria;	Alphaproteobacteria	circular	3052398	3011	T4SS	CONJ	F	T4SS_T4CP_MOB_F_600	2982	3015	virb4@ERLI001c01_030090&0.811241&5e-126	traU	t4cp1@ERLI001c01_029820&0.990909&8.4e-13	t4cp2@ERLI001c01_029820&0.882883&3.2e-34	t4cp3	MOBC	MOBF@ERLI001c01_029840&0.842045&2.9e-165	MOBH	MOBPHEN	MOBQ	MOBV	MOBT	MOBB	F_traE@ERLI001c01_030140&0.948187&3.1e-31	F_traH@ERLI001c01_030000&0.921909&5.3e-110	F_traK@ERLI001c01_030130&0.816547&1.1e-24	F_traL@ERLI001c01_030150&0.92&1.5e-27	F_traN@ERLI001c01_030020&0.792366&4.2e-07&7.5e-95	F_traU@ERLI001c01_030040&0.976048&1.9e-123	F_traV	F_traW@ERLI001c01_030050&0.877358&1.6e-66	F_trbC@ERLI001c01_030030&0.838428&1.1e-38	G_ICEHIN1056_000310	G_ICEHIN1056_000410	G_ICEHIN1056_000440	G_ICEHIN1056_000510	G_ICEHIN1056_000520	I_traI	I_traK	I_traL	I_traM	I_traN	I_traP	I_traQ	I_traR	I_traW	I_traY
NC_012214	Erwinia_pyrifoliae_Ep1/96,_complete_genome._	Proteobacteria;	Gammaproteobacteria	circular	4026322	3645	NOT4SS	MOB	O	NOT4SS_NOT4CP_MOB_O_602	503	503	virb4	traU	t4cp1	t4cp2	t4cp3	MOBC	MOBF	MOBH@ERPY001c01_005030&0.720588&7.2e-18	MOBPHEN	MOBQ	MOBV	MOBT	MOBB	F_traE	F_traH	F_traK	F_traL	F_traN	F_traU	F_traV	F_traW	F_trbC	G_ICEHIN1056_000310	G_ICEHIN1056_000410	G_ICEHIN1056_000440	G_ICEHIN1056_000510	G_ICEHIN1056_000520	I_traI	I_traK	I_traL	I_traM	I_traN	I_traP	I_traQ	I_traR	I_traW	I_traY
NC_012214	Erwinia_pyrifoliae_Ep1/96,_complete_genome._	Proteobacteria;	Gammaproteobacteria	circular	4026322	3645	T4SS	MOB	G	T4SS_NOT4CP_MOB_G_603	3041	3070	virb4@ERPY001c01_030660&0.806999&6.5e-78	traU	t4cp1	t4cp2	t4cp3	MOBC	MOBF	MOBH@ERPY001c01_030410&0.720588&7.6e-18	MOBPHEN	MOBQ	MOBV	MOBT	MOBB	F_traE	F_traH	F_traK	F_traL	F_traN	F_traU	F_traV	F_traW	F_trbC	G_ICEHIN1056_000310	G_ICEHIN1056_000410@ERPY001c01_030700&0.959276&3.3e-101	G_ICEHIN1056_000440@ERPY001c01_030670&0.942029&2.2e-56	G_ICEHIN1056_000510@ERPY001c01_030570&0.971554&1.1e-177	G_ICEHIN1056_000520@ERPY001c01_030580&0.963746&1.7e-131	I_traI	I_traK	I_traL	I_traM	I_traN	I_traP	I_traQ	I_traR	I_traW	I_traY
NC_012214	Erwinia_pyrifoliae_Ep1/96,_complete_genome._	Proteobacteria;	Gammaproteobacteria	circular	4026322	3645	T4SS	NOMOB	O	T4SS_NOT4CP_NOMOB_O_604	3228	3232	virb4@ERPY001c01_032280&0.806999&6.1e-78	traU	t4cp1	t4cp2	t4cp3	MOBC	MOBF	MOBH	MOBPHEN	MOBQ	MOBV	MOBT	MOBB	F_traE	F_traH	F_traK	F_traL	F_traN	F_traU	F_traV	F_traW	F_trbC	G_ICEHIN1056_000310	G_ICEHIN1056_000410@ERPY001c01_032320&0.959276&3.3e-101	G_ICEHIN1056_000440@ERPY001c01_032290&0.942029&2.2e-56	G_ICEHIN1056_000510	G_ICEHIN1056_000520	I_traI	I_traK	I_traL	I_traM	I_traN	I_traP	I_traQ	I_traR	I_traW	I_traY
NC_010694	Erwinia_tasmaniensis_Et1/99,_complete_genome._	Proteobacteria;	Gammaproteobacteria	circular	3883467	3427	NOT4SS	MOB	O	NOT4SS_NOT4CP_MOB_O_606	955	986	virb4	traU	t4cp1	t4cp2	t4cp3	MOBC	MOBF	MOBH	MOBPHEN@ERTA001c01_009860&0.879828&5.5e-22	MOBQ	MOBV	MOBT	MOBB	F_traE	F_traH	F_traK	F_traL	F_traN	F_traU	F_traV	F_traW	F_trbC	G_ICEHIN1056_000310	G_ICEHIN1056_000410	G_ICEHIN1056_000440	G_ICEHIN1056_000510	G_ICEHIN1056_000520	I_traI	I_traK	I_traL	I_traM	I_traN	I_traP@ERTA001c01_009550&0.60251&0.00032	I_traQ	I_traR	I_traW	I_traY
NC_004431	Escherichia_coli_CFT073,_complete_genome._	Proteobacteria;	Gammaproteobacteria	circular	5231428	5339	NOT4SS	MOB	O	NOT4SS_NOT4CP_MOB_O_618	2350	2350	virb4	traU	t4cp1	t4cp2	t4cp3	MOBC	MOBF	MOBH	MOBPHEN	MOBQ@ESCO004c01_023500&0.990783&1e-64	MOBV	MOBT	MOBB	F_traE	F_traH	F_traK	F_traL	F_traN	F_traU	F_traV	F_traW	F_trbC	G_ICEHIN1056_000310	G_ICEHIN1056_000410	G_ICEHIN1056_000440	G_ICEHIN1056_000510	G_ICEHIN1056_000520	I_traI	I_traK	I_traL	I_traM	I_traN	I_traP	I_traQ	I_traR	I_traW	I_traY
NC_008253	Escherichia_coli_536,_complete_genome._	Proteobacteria;	Gammaproteobacteria	circular	4938920	4620	NOT4SS	MOB	O	NOT4SS_NOT4CP_MOB_O_631	1901	1901	virb4	traU	t4cp1	t4cp2	t4cp3	MOBC	MOBF	MOBH	MOBPHEN	MOBQ@ESCO008c01_019010&0.990783&1e-64	MOBV	MOBT	MOBB	F_traE	F_traH	F_traK	F_traL	F_traN	F_traU	F_traV	F_traW	F_trbC	G_ICEHIN1056_000310	G_ICEHIN1056_000410	G_ICEHIN1056_000440@ESCO008c01_019010&0.572464&0.0023	G_ICEHIN1056_000510	G_ICEHIN1056_000520	I_traI	I_traK	I_traL	I_traM	I_traN	I_traP	I_traQ	I_traR	I_traW	I_traY
NC_011751	Escherichia_coli_UMN026,_complete_genome._	Proteobacteria;	Gammaproteobacteria	circular	5202090	4826	T4SS	CONJ	T	T4SS_T4CP_MOB_T_637	2260	2273	virb4@ESCO010c01_022600&0.879109&9.9e-226	traU	t4cp1@ESCO010c01_022720&0.909091&3.7e-06	t4cp2@ESCO010c01_022720&0.842342&6e-19	t4cp3	MOBC@ESCO010c01_022730&1&6.7e-66	MOBF	MOBH	MOBPHEN	MOBQ	MOBV	MOBT	MOBB	F_traE	F_traH	F_traK	F_traL	F_traN	F_traU	F_traV	F_traW	F_trbC	G_ICEHIN1056_000310	G_ICEHIN1056_000410	G_ICEHIN1056_000440	G_ICEHIN1056_000510	G_ICEHIN1056_000520	I_traI	I_traK	I_traL	I_traM	I_traN	I_traP	I_traQ	I_traR	I_traW	I_traY
NC_011748	Escherichia_coli_55989,_complete_genome._	Proteobacteria;	Gammaproteobacteria	circular	5154862	4763	NOT4SS	MOB	O	NOT4SS_NOT4CP_MOB_O_643	4727	4727	virb4	traU	t4cp1	t4cp2	t4cp3	MOBC	MOBF	MOBH@ESCO011c01_047270&0.97549&1.1e-46	MOBPHEN	MOBQ	MOBV	MOBT	MOBB	F_traE	F_traH	F_traK	F_traL	F_traN	F_traU	F_traV	F_traW	F_trbC	G_ICEHIN1056_000310	G_ICEHIN1056_000410	G_ICEHIN1056_000440	G_ICEHIN1056_000510	G_ICEHIN1056_000520	I_traI	I_traK	I_traL	I_traM	I_traN	I_traP	I_traQ	I_traR	I_traW	I_traY
NC_011745	Escherichia_coli_ED1a,_complete_genome._	Proteobacteria;	Gammaproteobacteria	circular	5209548	4915	T4SS	CONJ	T	T4SS_T4CP_MOB_T_645	2153	2191	virb4@ESCO012c01_021530&0.879109&9e-228	traU	t4cp1@ESCO012c01_021640&0.927273&3.3e-06	t4cp2@ESCO012c01_021640&0.842342&2.5e-19	t4cp3	MOBC@ESCO012c01_021650&1&4.2e-63	MOBF	MOBH	MOBPHEN	MOBQ@ESCO012c01_021910&0.976959&5e-68	MOBV	MOBT	MOBB	F_traE	F_traH	F_traK	F_traL	F_traN	F_traU	F_traV	F_traW	F_trbC	G_ICEHIN1056_000310	G_ICEHIN1056_000410	G_ICEHIN1056_000440	G_ICEHIN1056_000510	G_ICEHIN1056_000520	I_traI	I_traK	I_traL	I_traM	I_traN	I_traP	I_traQ	I_traR	I_traW	I_traY
NC_011745	Escherichia_coli_ED1a,_complete_genome._	Proteobacteria;	Gammaproteobacteria	circular	5209548	4915	T4SS	CONJ	G	T4SS_T4CP_MOB_G_647	3339	3409	virb4@ESCO012c01_033970&0.823966&8.9e-83	traU	t4cp1@ESCO012c01_034090&0.990909&4.6e-12	t4cp2@ESCO012c01_034090&0.968468&1.2e-31	t4cp3	MOBC	MOBF	MOBH@ESCO012c01_033390&0.877451&7e-10	MOBPHEN	MOBQ	MOBV	MOBT	MOBB	F_traE	F_traH	F_traK	F_traL	F_traN	F_traU	F_traV	F_traW	F_trbC	G_ICEHIN1056_000310	G_ICEHIN1056_000410@ESCO012c01_034010&0.927602&4.2e-98	G_ICEHIN1056_000440@ESCO012c01_033980&0.934783&6.8e-56	G_ICEHIN1056_000510@ESCO012c01_033910&0.964989&2.8e-177	G_ICEHIN1056_000520@ESCO012c01_033920&0.97281&9.3e-130	I_traI	I_traK	I_traL	I_traM	I_traN	I_traP	I_traQ	I_traR	I_traW	I_traY
NC_011741	Escherichia_coli_IAI1,_complete_genome._	Proteobacteria;	Gammaproteobacteria	circular	4700560	4353	NOT4SS	MOB	O	NOT4SS_T4CP_MOB_O_654	4329	4347	virb4	traU	t4cp1	t4cp2@ESCO014c01_043290&0.522523&5.4e-07	t4cp3	MOBC	MOBF	MOBH	MOBPHEN@ESCO014c01_043470&0.892704&8.1e-26	MOBQ	MOBV	MOBT	MOBB	F_traE	F_traH	F_traK	F_traL	F_traN	F_traU	F_traV	F_traW	F_trbC	G_ICEHIN1056_000310	G_ICEHIN1056_000410	G_ICEHIN1056_000440	G_ICEHIN1056_000510	G_ICEHIN1056_000520	I_traI	I_traK	I_traL	I_traM	I_traN	I_traP	I_traQ	I_traR	I_traW	I_traY
NC_009801	Escherichia_coli_E24377A,_complete_genome._	Proteobacteria;	Gammaproteobacteria	circular	4979619	4749	NOT4SS	MOB	O	NOT4SS_NOT4CP_MOB_O_663	2836	2881	virb4	traU	t4cp1	t4cp2	t4cp3	MOBC	MOBF	MOBH	MOBPHEN@ESCO017c01_028360&0.716738&2.5e-17	MOBQ	MOBV	MOBT	MOBB	F_traE	F_traH	F_traK	F_traL	F_traN	F_traU	F_traV	F_traW	F_trbC	G_ICEHIN1056_000310	G_ICEHIN1056_000410	G_ICEHIN1056_000440	G_ICEHIN1056_000510	G_ICEHIN1056_000520	I_traI	I_traK	I_traL	I_traM	I_traN	I_traP@ESCO017c01_028810&0.589958&0.00028	I_traQ	I_traR	I_traW	I_traY
NC_009801	Escherichia_coli_E24377A,_complete_genome._	Proteobacteria;	Gammaproteobacteria	circular	4979619	4749	NOT4SS	MOB	O	NOT4SS_NOT4CP_MOB_O_664	3253	3253	virb4	traU	t4cp1	t4cp2	t4cp3	MOBC	MOBF	MOBH@ESCO017c01_032530&0.887255&1.6e-17	MOBPHEN	MOBQ	MOBV	MOBT	MOBB	F_traE	F_traH	F_traK	F_traL	F_traN	F_traU	F_traV	F_traW	F_trbC	G_ICEHIN1056_000310	G_ICEHIN1056_000410	G_ICEHIN1056_000440	G_ICEHIN1056_000510	G_ICEHIN1056_000520	I_traI	I_traK	I_traL	I_traM	I_traN	I_traP	I_traQ	I_traR	I_traW	I_traY
NC_013941	Escherichia_coli_O55:H7_str._CB9615_chromosome,_complete_genome._	Proteobacteria;	Gammaproteobacteria	circular	5386352	5014	NOT4SS	MOB	O	NOT4SS_NOT4CP_MOB_O_712	3215	3258	virb4	traU	t4cp1	t4cp2	t4cp3	MOBC	MOBF	MOBH	MOBPHEN@ESCO032c01_032150&0.88412&2.1e-24	MOBQ	MOBV	MOBT	MOBB	F_traE	F_traH	F_traK	F_traL	F_traN	F_traU	F_traV	F_traW	F_trbC	G_ICEHIN1056_000310	G_ICEHIN1056_000410	G_ICEHIN1056_000440	G_ICEHIN1056_000510	G_ICEHIN1056_000520	I_traI	I_traK	I_traL	I_traM	I_traN	I_traP@ESCO032c01_032580&0.594142&0.00017	I_traQ	I_traR	I_traW	I_traY
NC_012778	Eubacterium_eligens_ATCC_27750,_complete_genome._	Firmicutes;	Firmicutes	circular	2144190	2004	NOT4SS	MOB	O	NOT4SS_NOT4CP_MOB_O_718	1771	1794	virb4	traU	t4cp1	t4cp2	t4cp3	MOBC	MOBF	MOBH	MOBPHEN@EUEL001c01_017940&0.83691&1.6e-26	MOBQ	MOBV@EUEL001c01_017710&0.926471&3.3e-29	MOBT	MOBB	F_traE	F_traH	F_traK	F_traL	F_traN	F_traU	F_traV	F_traW	F_trbC	G_ICEHIN1056_000310	G_ICEHIN1056_000410	G_ICEHIN1056_000440	G_ICEHIN1056_000510	G_ICEHIN1056_000520	I_traI	I_traK	I_traL	I_traM	I_traN	I_traP	I_traQ	I_traR	I_traW	I_traY
NC_012781	Eubacterium_rectale_ATCC_33656,_complete_genome._	Firmicutes;	Firmicutes	circular	3449685	3621	NOT4SS	MOB	O	NOT4SS_NOT4CP_MOB_O_719	390	390	virb4	traU	t4cp1	t4cp2	t4cp3	MOBC	MOBF	MOBH	MOBPHEN	MOBQ	MOBV@EURE001c01_003900&0.906863&4.4e-31	MOBT	MOBB	F_traE	F_traH	F_traK	F_traL	F_traN	F_traU	F_traV	F_traW	F_trbC	G_ICEHIN1056_000310	G_ICEHIN1056_000410	G_ICEHIN1056_000440	G_ICEHIN1056_000510	G_ICEHIN1056_000520	I_traI	I_traK	I_traL	I_traM	I_traN	I_traP	I_traQ	I_traR	I_traW	I_traY
NC_012781	Eubacterium_rectale_ATCC_33656,_complete_genome._	Firmicutes;	Firmicutes	circular	3449685	3621	T4SS	CONJ	O	T4SS_T4CP_MOB_O_720	767	803	virb4@EURE001c01_007770&0.556734&4.9e-91	traU	t4cp1@EURE001c01_008030&0.581818&1.4e-10	t4cp2@EURE001c01_008010&0.968468&2.9e-38	t4cp3	MOBC	MOBF	MOBH	MOBPHEN@EURE001c01_007670&0.841202&1.3e-22	MOBQ@EURE001c01_007870&0.990783&3.1e-65	MOBV	MOBT	MOBB	F_traE	F_traH	F_traK	F_traL	F_traN	F_traU	F_traV	F_traW	F_trbC	G_ICEHIN1056_000310	G_ICEHIN1056_000410	G_ICEHIN1056_000440	G_ICEHIN1056_000510	G_ICEHIN1056_000520	I_traI	I_traK	I_traL	I_traM	I_traN	I_traP	I_traQ	I_traR	I_traW	I_traY
NC_012781	Eubacterium_rectale_ATCC_33656,_complete_genome._	Firmicutes;	Firmicutes	circular	3449685	3621	T4SS	CONJ	O	T4SS_T4CP_MOB_O_722	2672	2710	virb4@EURE001c01_026990&0.556734&4.9e-91	traU	t4cp1@EURE001c01_026720&0.581818&1.4e-10	t4cp2@EURE001c01_026740&0.968468&2.9e-38	t4cp3	MOBC	MOBF	MOBH	MOBPHEN@EURE001c01_027100&0.841202&1.3e-22	MOBQ@EURE001c01_026880&0.990783&3.1e-65	MOBV	MOBT	MOBB	F_traE	F_traH	F_traK	F_traL	F_traN	F_traU	F_traV	F_traW	F_trbC	G_ICEHIN1056_000310	G_ICEHIN1056_000410	G_ICEHIN1056_000440	G_ICEHIN1056_000510	G_ICEHIN1056_000520	I_traI	I_traK	I_traL	I_traM	I_traN	I_traP	I_traQ	I_traR	I_traW	I_traY
NC_012781	Eubacterium_rectale_ATCC_33656,_complete_genome._	Firmicutes;	Firmicutes	circular	3449685	3621	T4SS	CONJ	O	T4SS_T4CP_MOB_O_723	3480	3583	virb4@EURE001c01_035550&0.73701&1.8e-93	traU	t4cp1@EURE001c01_035830&1&9.2e-16	t4cp2@EURE001c01_035740&0.882883&9.9e-42	t4cp3	MOBC	MOBF	MOBH	MOBPHEN@EURE001c01_035640&0.763948&2.4e-13@EURE001c01_035280&0.914163&1.7e-29	MOBQ@EURE001c01_034800&1&2.8e-56	MOBV@EURE001c01_035800&0.602941&4.5e-09	MOBT	MOBB	F_traE	F_traH	F_traK	F_traL	F_traN	F_traU	F_traV	F_traW	F_trbC	G_ICEHIN1056_000310	G_ICEHIN1056_000410	G_ICEHIN1056_000440	G_ICEHIN1056_000510	G_ICEHIN1056_000520	I_traI	I_traK	I_traL	I_traM	I_traN	I_traP	I_traQ	I_traR	I_traW	I_traY
NC_013849	Ferroglobus_placidus_DSM_10642_chromosome,_complete_genome._	Euryarchaeota;	Euryarchaeota	circular	2196266	2480	T4SS	NOMOB	O	T4SS_T4CP_NOMOB_O_725	425	440	virb4@FEPL001c01_004400&0.542948&6e-70	traU	t4cp1@FEPL001c01_004380&0.990909&1.1e-05	t4cp2@FEPL001c01_004380&0.617117&6e-13@FEPL001c01_004250&0.63964&2.1e-11	t4cp3	MOBC	MOBF	MOBH	MOBPHEN	MOBQ	MOBV	MOBT	MOBB	F_traE	F_traH	F_traK	F_traL	F_traN	F_traU	F_traV	F_traW	F_trbC	G_ICEHIN1056_000310	G_ICEHIN1056_000410	G_ICEHIN1056_000440	G_ICEHIN1056_000510	G_ICEHIN1056_000520	I_traI	I_traK	I_traL	I_traM	I_traN	I_traP	I_traQ	I_traR	I_traW	I_traY
NC_010376	Finegoldia_magna_ATCC_29328,_complete_genome._	Firmicutes;	Firmicutes	circular	1797577	1631	T4SS	CONJ	O	T4SS_T4CP_MOB_O_729	994	1033	virb4@FIMA001c01_010110&0.803818&1.9e-98	traU	t4cp1@FIMA001c01_010330&0.990909&5.8e-20	t4cp2@FIMA001c01_010190&0.887387&8e-42	t4cp3	MOBC	MOBF	MOBH	MOBPHEN@FIMA001c01_009940&0.927039&1.4e-27	MOBQ@FIMA001c01_010240&0.986175&7.9e-70	MOBV	MOBT	MOBB	F_traE	F_traH	F_traK	F_traL	F_traN	F_traU	F_traV	F_traW	F_trbC	G_ICEHIN1056_000310	G_ICEHIN1056_000410	G_ICEHIN1056_000440	G_ICEHIN1056_000510	G_ICEHIN1056_000520	I_traI	I_traK	I_traL	I_traM	I_traN	I_traP	I_traQ	I_traR	I_traW	I_traY
NC_009441	Flavobacterium_johnsoniae_UW101,_complete_genome._	Bacteroidetes;	Bacteroidetes	circular	6096872	5017	T4SS	CONJ	O	T4SS_T4CP_MOB_O_732	3053	3068	virb4@FLJO001c01_030530&0.794274&8.9e-89	traU	t4cp1@FLJO001c01_030680&0.981818&1.7e-08	t4cp2@FLJO001c01_030680&0.936937&7.2e-21	t4cp3	MOBC	MOBF	MOBH	MOBPHEN@FLJO001c01_030670&0.746781&3.3e-21	MOBQ	MOBV	MOBT	MOBB	F_traE	F_traH	F_traK	F_traL	F_traN	F_traU	F_traV	F_traW	F_trbC	G_ICEHIN1056_000310	G_ICEHIN1056_000410	G_ICEHIN1056_000440	G_ICEHIN1056_000510	G_ICEHIN1056_000520	I_traI	I_traK	I_traL	I_traM	I_traN	I_traP	I_traQ	I_traR	I_traW	I_traY
NC_009441	Flavobacterium_johnsoniae_UW101,_complete_genome._	Bacteroidetes;	Bacteroidetes	circular	6096872	5017	T4SS	CONJ	O	T4SS_T4CP_MOB_O_733	3587	3606	virb4@FLJO001c01_035870&0.753977&1.2e-98	traU	t4cp1@FLJO001c01_036060&0.990909&7.3e-10	t4cp2@FLJO001c01_036060&0.936937&9.3e-27	t4cp3	MOBC	MOBF	MOBH	MOBPHEN@FLJO001c01_036050&0.515021&4.2e-18	MOBQ	MOBV	MOBT	MOBB	F_traE	F_traH	F_traK	F_traL	F_traN	F_traU	F_traV	F_traW	F_trbC	G_ICEHIN1056_000310	G_ICEHIN1056_000410	G_ICEHIN1056_000440	G_ICEHIN1056_000510	G_ICEHIN1056_000520	I_traI	I_traK	I_traL	I_traM	I_traN	I_traP	I_traQ	I_traR	I_traW	I_traY
NC_009441	Flavobacterium_johnsoniae_UW101,_complete_genome._	Bacteroidetes;	Bacteroidetes	circular	6096872	5017	NOT4SS	MOB	O	NOT4SS_T4CP_MOB_O_734	3696	3800	virb4	traU	t4cp1@FLJO001c01_037990&0.990909&1.3e-06	t4cp2@FLJO001c01_037990&0.95045&3e-27	t4cp3	MOBC	MOBF	MOBH	MOBPHEN@FLJO001c01_038000&0.635193&4.3e-23@FLJO001c01_037550&0.695279&4.5e-21@FLJO001c01_037270&0.939914&3e-25@FLJO001c01_036960&0.716738&1.4e-22	MOBQ	MOBV	MOBT	MOBB	F_traE	F_traH	F_traK	F_traL	F_traN	F_traU	F_traV	F_traW	F_trbC	G_ICEHIN1056_000310	G_ICEHIN1056_000410	G_ICEHIN1056_000440	G_ICEHIN1056_000510	G_ICEHIN1056_000520	I_traI	I_traK	I_traL	I_traM	I_traN	I_traP	I_traQ	I_traR	I_traW	I_traY
NC_009441	Flavobacterium_johnsoniae_UW101,_complete_genome._	Bacteroidetes;	Bacteroidetes	circular	6096872	5017	T4SS	NOMOB	O	T4SS_T4CP_NOMOB_O_735	4398	4422	virb4@FLJO001c01_043980&0.770944&5.5e-99	traU	t4cp1@FLJO001c01_044220&0.990909&4.6e-11	t4cp2@FLJO001c01_044220&0.936937&5e-27	t4cp3	MOBC	MOBF	MOBH	MOBPHEN	MOBQ	MOBV	MOBT	MOBB	F_traE	F_traH	F_traK	F_traL	F_traN	F_traU	F_traV	F_traW	F_trbC	G_ICEHIN1056_000310	G_ICEHIN1056_000410	G_ICEHIN1056_000440	G_ICEHIN1056_000510	G_ICEHIN1056_000520	I_traI	I_traK	I_traL	I_traM	I_traN	I_traP	I_traQ	I_traR	I_traW	I_traY
NC_009613	Flavobacterium_psychrophilum_JIP02/86,_complete_genome._	Bacteroidetes;	Bacteroidetes	circular	2861988	2412	NOT4SS	MOB	O	NOT4SS_T4CP_MOB_O_736	484	486	virb4	traU	t4cp1@FLPS001c01_004840&0.990909&0.0003	t4cp2@FLPS001c01_004840&0.959459&1e-31	t4cp3	MOBC	MOBF	MOBH	MOBPHEN@FLPS001c01_004860&0.892704&2.8e-28	MOBQ	MOBV	MOBT	MOBB	F_traE	F_traH	F_traK	F_traL	F_traN	F_traU	F_traV	F_traW	F_trbC	G_ICEHIN1056_000310	G_ICEHIN1056_000410	G_ICEHIN1056_000440	G_ICEHIN1056_000510	G_ICEHIN1056_000520	I_traI	I_traK	I_traL	I_traM	I_traN	I_traP	I_traQ	I_traR	I_traW	I_traY
NC_008278	Frankia_alni_ACN14a,_complete_genome._	Actinobacteria;	Actinobacteria	circular	7497934	6711	NOT4SS	MOB	O	NOT4SS_NOT4CP_MOB_O_737	6215	6215	virb4	traU	t4cp1	t4cp2	t4cp3	MOBC	MOBF@FRAL001c01_062150&0.792045&5.3e-99&5e-09	MOBH	MOBPHEN	MOBQ	MOBV	MOBT	MOBB	F_traE	F_traH	F_traK	F_traL	F_traN	F_traU	F_traV	F_traW	F_trbC	G_ICEHIN1056_000310	G_ICEHIN1056_000410	G_ICEHIN1056_000440	G_ICEHIN1056_000510	G_ICEHIN1056_000520	I_traI	I_traK	I_traL	I_traM	I_traN	I_traP	I_traQ	I_traR	I_traW	I_traY
NC_007777	Frankia_sp._CcI3,_complete_genome._	Actinobacteria;	Actinobacteria	circular	5433628	4499	T4SS	NOMOB	O	T4SS_T4CP_NOMOB_O_739	1701	1702	virb4@FRCC001c01_017010&0.564157&7.3e-87	traU	t4cp1@FRCC001c01_017020&0.854545&0.00054	t4cp2@FRCC001c01_017020&0.554054&1.1e-09	t4cp3	MOBC	MOBF	MOBH	MOBPHEN	MOBQ	MOBV	MOBT	MOBB	F_traE	F_traH	F_traK	F_traL	F_traN	F_traU	F_traV	F_traW	F_trbC	G_ICEHIN1056_000310	G_ICEHIN1056_000410	G_ICEHIN1056_000440	G_ICEHIN1056_000510	G_ICEHIN1056_000520	I_traI	I_traK	I_traL	I_traM	I_traN	I_traP	I_traQ	I_traR	I_traW	I_traY
NC_007777	Frankia_sp._CcI3,_complete_genome._	Actinobacteria;	Actinobacteria	circular	5433628	4499	NOT4SS	MOB	O	NOT4SS_T4CP_MOB_O_741	2355	2361	virb4	traU	t4cp1@FRCC001c01_023610&0.990909&8.2e-24	t4cp2@FRCC001c01_023610&0.963964&8.5e-33	t4cp3	MOBC	MOBF	MOBH	MOBPHEN@FRCC001c01_023550&0.695279&8.5e-24	MOBQ	MOBV	MOBT	MOBB	F_traE	F_traH	F_traK	F_traL	F_traN	F_traU	F_traV	F_traW	F_trbC	G_ICEHIN1056_000310	G_ICEHIN1056_000410	G_ICEHIN1056_000440	G_ICEHIN1056_000510	G_ICEHIN1056_000520	I_traI	I_traK	I_traL	I_traM	I_traN	I_traP	I_traQ	I_traR	I_traW	I_traY
NC_007777	Frankia_sp._CcI3,_complete_genome._	Actinobacteria;	Actinobacteria	circular	5433628	4499	NOT4SS	MOB	O	NOT4SS_T4CP_MOB_O_742	3300	3333	virb4	traU	t4cp1@FRCC001c01_033000&0.954545&1.2e-11	t4cp2@FRCC001c01_033000&0.923423&4e-23	t4cp3	MOBC	MOBF@FRCC001c01_033330&0.821591&1.6e-89&3.6e-07	MOBH	MOBPHEN	MOBQ	MOBV	MOBT	MOBB	F_traE	F_traH	F_traK	F_traL	F_traN	F_traU	F_traV	F_traW	F_trbC	G_ICEHIN1056_000310	G_ICEHIN1056_000410	G_ICEHIN1056_000440	G_ICEHIN1056_000510	G_ICEHIN1056_000520	I_traI	I_traK	I_traL	I_traM	I_traN	I_traP	I_traQ	I_traR	I_traW	I_traY
NC_009921	Frankia_sp._EAN1pec,_complete_genome._	Actinobacteria;	Actinobacteria	circular	8982042	7191	NOT4SS	MOB	O	NOT4SS_T4CP_MOB_O_743	1302	1379	virb4	traU	t4cp1@FREA001c01_013790&0.981818&8.1e-12	t4cp2@FREA001c01_013790&0.918919&7.2e-27	t4cp3	MOBC@FREA001c01_013020&0.63981&0.0013	MOBF@FREA001c01_013540&0.980682&1.8e-116	MOBH	MOBPHEN	MOBQ	MOBV	MOBT	MOBB	F_traE	F_traH	F_traK	F_traL	F_traN	F_traU	F_traV	F_traW	F_trbC	G_ICEHIN1056_000310	G_ICEHIN1056_000410	G_ICEHIN1056_000440	G_ICEHIN1056_000510	G_ICEHIN1056_000520	I_traI	I_traK	I_traL	I_traM	I_traN	I_traP	I_traQ	I_traR	I_traW	I_traY
NC_009921	Frankia_sp._EAN1pec,_complete_genome._	Actinobacteria;	Actinobacteria	circular	8982042	7191	T4SS	NOMOB	O	T4SS_T4CP_NOMOB_O_744	2536	2537	virb4@FREA001c01_025360&0.560976&1e-87	traU	t4cp1	t4cp2@FREA001c01_025370&0.554054&6.2e-08	t4cp3	MOBC	MOBF	MOBH	MOBPHEN	MOBQ	MOBV	MOBT	MOBB	F_traE	F_traH	F_traK	F_traL	F_traN	F_traU	F_traV	F_traW	F_trbC	G_ICEHIN1056_000310	G_ICEHIN1056_000410	G_ICEHIN1056_000440	G_ICEHIN1056_000510	G_ICEHIN1056_000520	I_traI	I_traK	I_traL	I_traM	I_traN	I_traP	I_traQ	I_traR	I_traW	I_traY
NC_009921	Frankia_sp._EAN1pec,_complete_genome._	Actinobacteria;	Actinobacteria	circular	8982042	7191	T4SS	NOMOB	O	T4SS_T4CP_NOMOB_O_745	2728	2729	virb4@FREA001c01_027280&0.560976&5.6e-87	traU	t4cp1@FREA001c01_027290&0.863636&0.00013	t4cp2@FREA001c01_027290&0.554054&1.8e-10	t4cp3	MOBC	MOBF	MOBH	MOBPHEN	MOBQ	MOBV	MOBT	MOBB	F_traE	F_traH	F_traK	F_traL	F_traN	F_traU	F_traV	F_traW	F_trbC	G_ICEHIN1056_000310	G_ICEHIN1056_000410	G_ICEHIN1056_000440	G_ICEHIN1056_000510	G_ICEHIN1056_000520	I_traI	I_traK	I_traL	I_traM	I_traN	I_traP	I_traQ	I_traR	I_traW	I_traY
NC_009921	Frankia_sp._EAN1pec,_complete_genome._	Actinobacteria;	Actinobacteria	circular	8982042	7191	T4SS	NOMOB	O	T4SS_T4CP_NOMOB_O_746	6646	6647	virb4@FREA001c01_066460&0.551432&5.4e-79	traU	t4cp1@FREA001c01_066470&0.6&6.9e-05	t4cp2@FREA001c01_066470&0.59009&2.4e-11	t4cp3	MOBC	MOBF	MOBH	MOBPHEN	MOBQ	MOBV	MOBT	MOBB	F_traE	F_traH	F_traK	F_traL	F_traN	F_traU	F_traV	F_traW	F_trbC	G_ICEHIN1056_000310	G_ICEHIN1056_000410	G_ICEHIN1056_000440	G_ICEHIN1056_000510	G_ICEHIN1056_000520	I_traI	I_traK	I_traL	I_traM	I_traN	I_traP	I_traQ	I_traR	I_traW	I_traY
NC_010336	Francisella_philomiragia_subsp._philomiragia_ATCC_25017,_complete_genome._	Proteobacteria;	Gammaproteobacteria	circular	2045775	1911	NOT4SS	MOB	O	NOT4SS_T4CP_MOB_O_748	1884	1885	virb4	traU	t4cp1@FRPH001c01_018850&0.936364&2.6e-06	t4cp2@FRPH001c01_018850&0.878378&2.5e-15	t4cp3	MOBC@FRPH001c01_018840&0.900474&1.6e-29	MOBF	MOBH	MOBPHEN	MOBQ	MOBV	MOBT	MOBB	F_traE	F_traH	F_traK	F_traL	F_traN	F_traU	F_traV	F_traW	F_trbC	G_ICEHIN1056_000310	G_ICEHIN1056_000410	G_ICEHIN1056_000440	G_ICEHIN1056_000510	G_ICEHIN1056_000520	I_traI	I_traK	I_traL	I_traM	I_traN	I_traP	I_traQ	I_traR	I_traW	I_traY
NC_009257	Francisella_tularensis_subsp._tularensis_WY96-3418,_complete_genome._	Proteobacteria;	Gammaproteobacteria	circular	1898476	1634	NOT4SS	MOB	O	NOT4SS_NOT4CP_MOB_O_751	1156	1156	virb4	traU	t4cp1	t4cp2	t4cp3	MOBC@FRTU001c01_011560&0.696682&2.7e-24	MOBF	MOBH	MOBPHEN	MOBQ	MOBV	MOBT	MOBB	F_traE	F_traH	F_traK	F_traL	F_traN	F_traU	F_traV	F_traW	F_trbC	G_ICEHIN1056_000310	G_ICEHIN1056_000410	G_ICEHIN1056_000440	G_ICEHIN1056_000510	G_ICEHIN1056_000520	I_traI	I_traK	I_traL	I_traM	I_traN	I_traP	I_traQ	I_traR	I_traW	I_traY
NC_008245	Francisella_tularensis_subsp._tularensis_FSC198,_complete_genome._	Proteobacteria;	Gammaproteobacteria	circular	1892616	1605	NOT4SS	MOB	O	NOT4SS_NOT4CP_MOB_O_755	988	988	virb4	traU	t4cp1	t4cp2	t4cp3	MOBC@FRTU003c01_009880&0.563981&6.9e-21	MOBF	MOBH	MOBPHEN	MOBQ	MOBV	MOBT	MOBB	F_traE	F_traH	F_traK	F_traL	F_traN	F_traU	F_traV	F_traW	F_trbC	G_ICEHIN1056_000310	G_ICEHIN1056_000410	G_ICEHIN1056_000440	G_ICEHIN1056_000510	G_ICEHIN1056_000520	I_traI	I_traK	I_traL	I_traM	I_traN	I_traP	I_traQ	I_traR	I_traW	I_traY
NC_010677	Francisella_tularensis_subsp._mediasiatica_FSC147,_complete_genome._	Proteobacteria;	Gammaproteobacteria	circular	1893886	1406	NOT4SS	MOB	O	NOT4SS_NOT4CP_MOB_O_760	718	718	virb4	traU	t4cp1	t4cp2	t4cp3	MOBC@FRTU007c01_007180&0.696682&3.1e-24	MOBF	MOBH	MOBPHEN	MOBQ	MOBV	MOBT	MOBB	F_traE	F_traH	F_traK	F_traL	F_traN	F_traU	F_traV	F_traW	F_trbC	G_ICEHIN1056_000310	G_ICEHIN1056_000410	G_ICEHIN1056_000440	G_ICEHIN1056_000510	G_ICEHIN1056_000520	I_traI	I_traK	I_traL	I_traM	I_traN	I_traP	I_traQ	I_traR	I_traW	I_traY
NC_006570	Francisella_tularensis_subsp._tularensis_Schu_4,_complete_genome._	Proteobacteria;	Gammaproteobacteria	circular	1892819	1603	NOT4SS	MOB	O	NOT4SS_NOT4CP_MOB_O_764	987	987	virb4	traU	t4cp1	t4cp2	t4cp3	MOBC@FRTU008c01_009870&0.563981&6.9e-21	MOBF	MOBH	MOBPHEN	MOBQ	MOBV	MOBT	MOBB	F_traE	F_traH	F_traK	F_traL	F_traN	F_traU	F_traV	F_traW	F_trbC	G_ICEHIN1056_000310	G_ICEHIN1056_000410	G_ICEHIN1056_000440	G_ICEHIN1056_000510	G_ICEHIN1056_000520	I_traI	I_traK	I_traL	I_traM	I_traN	I_traP	I_traQ	I_traR	I_traW	I_traY
NC_010814	Geobacter_lovleyi_SZ,_complete_genome._	Proteobacteria;	Deltaproteobacteria	circular	3917761	3606	T4SS	NOMOB	F	T4SS_T4CP_NOMOB_F_766	240	310	virb4@GELO001c01_003050&0.81018&7.1e-115	traU	t4cp1@GELO001c01_002400&0.972727&3.7e-09	t4cp2@GELO001c01_003050&0.504505&0.00034@GELO001c01_002400&0.927928&2e-24	t4cp3	MOBC	MOBF	MOBH	MOBPHEN	MOBQ	MOBV	MOBT	MOBB	F_traE@GELO001c01_003090&0.963731&3.4e-48	F_traH@GELO001c01_002430&0.943601&6.5e-61	F_traK@GELO001c01_003080&0.834532&1.9e-36	F_traL@GELO001c01_003100&0.91&3.5e-10	F_traN@GELO001c01_003030&0.630534&1.9e-55	F_traU@GELO001c01_003000&0.967066&1.2e-115	F_traV@GELO001c01_003060&0.587755&1.5e-21	F_traW@GELO001c01_003020&0.924528&3.4e-44	F_trbC@GELO001c01_002990&0.80786&5.1e-33	G_ICEHIN1056_000310	G_ICEHIN1056_000410	G_ICEHIN1056_000440	G_ICEHIN1056_000510	G_ICEHIN1056_000520	I_traI	I_traK	I_traL	I_traM	I_traN	I_traP	I_traQ	I_traR	I_traW	I_traY
NC_012918	Geobacter_sp._M21,_complete_genome._	Proteobacteria;	Deltaproteobacteria	circular	4745806	4080	T4SS	CONJ	T	T4SS_T4CP_MOB_T_769	2342	2352	virb4@GEM2001c01_023460&0.813362&2.6e-176	traU	t4cp1@GEM2001c01_023500&0.981818&7.8e-14	t4cp2@GEM2001c01_023500&0.855856&8.4e-30	t4cp3	MOBC	MOBF@GEM2001c01_023520&0.9625&1e-136	MOBH	MOBPHEN	MOBQ	MOBV	MOBT	MOBB	F_traE	F_traH	F_traK	F_traL	F_traN	F_traU	F_traV	F_traW	F_trbC	G_ICEHIN1056_000310	G_ICEHIN1056_000410	G_ICEHIN1056_000440	G_ICEHIN1056_000510	G_ICEHIN1056_000520	I_traI	I_traK	I_traL	I_traM	I_traN	I_traP	I_traQ	I_traR	I_traW	I_traY
NC_013757	Geodermatophilus_obscurus_DSM_43160,_complete_genome._	Actinobacteria;	Actinobacteria	circular	5322497	4810	NOT4SS	MOB	O	NOT4SS_NOT4CP_MOB_O_771	18	18	virb4	traU	t4cp1	t4cp2	t4cp3	MOBC	MOBF@GEOB001c01_000180&0.909091&5.7e-97&2.6e-21	MOBH	MOBPHEN	MOBQ	MOBV	MOBT	MOBB	F_traE	F_traH	F_traK	F_traL	F_traN	F_traU	F_traV	F_traW	F_trbC	G_ICEHIN1056_000310	G_ICEHIN1056_000410	G_ICEHIN1056_000440	G_ICEHIN1056_000510	G_ICEHIN1056_000520	I_traI	I_traK	I_traL	I_traM	I_traN	I_traP	I_traQ	I_traR	I_traW	I_traY
NC_013757	Geodermatophilus_obscurus_DSM_43160,_complete_genome._	Actinobacteria;	Actinobacteria	circular	5322497	4810	NOT4SS	MOB	O	NOT4SS_T4CP_MOB_O_772	668	718	virb4	traU	t4cp1@GEOB001c01_006680&0.981818&4.9e-06	t4cp2@GEOB001c01_006680&0.963964&2.2e-31	t4cp3	MOBC	MOBF@GEOB001c01_007180&0.994318&1.9e-196	MOBH	MOBPHEN	MOBQ	MOBV	MOBT	MOBB	F_traE	F_traH	F_traK	F_traL	F_traN	F_traU	F_traV	F_traW	F_trbC	G_ICEHIN1056_000310	G_ICEHIN1056_000410	G_ICEHIN1056_000440	G_ICEHIN1056_000510	G_ICEHIN1056_000520	I_traI	I_traK	I_traL	I_traM	I_traN	I_traP	I_traQ	I_traR	I_traW	I_traY
NC_013757	Geodermatophilus_obscurus_DSM_43160,_complete_genome._	Actinobacteria;	Actinobacteria	circular	5322497	4810	NOT4SS	MOB	O	NOT4SS_NOT4CP_MOB_O_773	824	824	virb4	traU	t4cp1	t4cp2	t4cp3	MOBC	MOBF@GEOB001c01_008240&0.909091&8.2e-94&3.7e-20	MOBH	MOBPHEN	MOBQ	MOBV	MOBT	MOBB	F_traE	F_traH	F_traK	F_traL	F_traN	F_traU	F_traV	F_traW	F_trbC	G_ICEHIN1056_000310	G_ICEHIN1056_000410	G_ICEHIN1056_000440	G_ICEHIN1056_000510	G_ICEHIN1056_000520	I_traI	I_traK	I_traL	I_traM	I_traN	I_traP	I_traQ	I_traR	I_traW	I_traY
NC_013757	Geodermatophilus_obscurus_DSM_43160,_complete_genome._	Actinobacteria;	Actinobacteria	circular	5322497	4810	NOT4SS	MOB	O	NOT4SS_NOT4CP_MOB_O_775	1391	1391	virb4	traU	t4cp1	t4cp2	t4cp3	MOBC	MOBF@GEOB001c01_013910&0.904545&3.6e-91&2.9e-15	MOBH	MOBPHEN	MOBQ	MOBV	MOBT	MOBB	F_traE	F_traH	F_traK	F_traL	F_traN	F_traU	F_traV	F_traW	F_trbC	G_ICEHIN1056_000310	G_ICEHIN1056_000410	G_ICEHIN1056_000440	G_ICEHIN1056_000510	G_ICEHIN1056_000520	I_traI	I_traK	I_traL	I_traM	I_traN	I_traP	I_traQ	I_traR	I_traW	I_traY
NC_013757	Geodermatophilus_obscurus_DSM_43160,_complete_genome._	Actinobacteria;	Actinobacteria	circular	5322497	4810	NOT4SS	MOB	O	NOT4SS_NOT4CP_MOB_O_776	1925	1925	virb4	traU	t4cp1	t4cp2	t4cp3	MOBC	MOBF@GEOB001c01_019250&0.914773&6.2e-91&2.7e-17	MOBH	MOBPHEN	MOBQ	MOBV	MOBT	MOBB	F_traE	F_traH	F_traK	F_traL	F_traN	F_traU	F_traV	F_traW	F_trbC	G_ICEHIN1056_000310	G_ICEHIN1056_000410	G_ICEHIN1056_000440	G_ICEHIN1056_000510	G_ICEHIN1056_000520	I_traI	I_traK	I_traL	I_traM	I_traN	I_traP	I_traQ	I_traR	I_traW	I_traY
NC_010125	Gluconacetobacter_diazotrophicus_PAl_5,_complete_genome._	Proteobacteria;	Alphaproteobacteria	circular	3944163	3778	T4SS	CONJ	T	T4SS_T4CP_MOB_T_781	111	131	virb4@GLDI001c01_001270&0.819724&2.3e-170	traU	t4cp1@GLDI001c01_001220&1&1e-25	t4cp2@GLDI001c01_001220&1&1.8e-54	t4cp3	MOBC	MOBF	MOBH	MOBPHEN@GLDI001c01_001110&0.545064&1.1e-23	MOBQ	MOBV	MOBT	MOBB	F_traE	F_traH	F_traK	F_traL	F_traN	F_traU	F_traV	F_traW	F_trbC	G_ICEHIN1056_000310	G_ICEHIN1056_000410	G_ICEHIN1056_000440	G_ICEHIN1056_000510	G_ICEHIN1056_000520	I_traI	I_traK	I_traL	I_traM	I_traN	I_traP	I_traQ	I_traR	I_traW	I_traY
NC_010125	Gluconacetobacter_diazotrophicus_PAl_5,_complete_genome._	Proteobacteria;	Alphaproteobacteria	circular	3944163	3778	NOT4SS	MOB	O	NOT4SS_NOT4CP_MOB_O_782	390	390	virb4	traU	t4cp1	t4cp2	t4cp3	MOBC	MOBF	MOBH	MOBPHEN@GLDI001c01_003900&0.879828&6.5e-33	MOBQ	MOBV	MOBT	MOBB	F_traE	F_traH	F_traK	F_traL	F_traN	F_traU	F_traV	F_traW	F_trbC	G_ICEHIN1056_000310	G_ICEHIN1056_000410	G_ICEHIN1056_000440	G_ICEHIN1056_000510	G_ICEHIN1056_000520	I_traI	I_traK	I_traL	I_traM	I_traN	I_traP	I_traQ	I_traR	I_traW	I_traY
NC_010125	Gluconacetobacter_diazotrophicus_PAl_5,_complete_genome._	Proteobacteria;	Alphaproteobacteria	circular	3944163	3778	T4SS	CONJ	T	T4SS_T4CP_MOB_T_783	1004	1078	virb4@GLDI001c01_010080&0.817603&5.9e-178	traU	t4cp1@GLDI001c01_010150&1&9.5e-26	t4cp2@GLDI001c01_010150&1&5.9e-56	t4cp3	MOBC	MOBF	MOBH	MOBPHEN@GLDI001c01_010190&0.858369&1.1e-28	MOBQ	MOBV	MOBT	MOBB	F_traE	F_traH	F_traK	F_traL	F_traN	F_traU	F_traV	F_traW	F_trbC	G_ICEHIN1056_000310	G_ICEHIN1056_000410	G_ICEHIN1056_000440	G_ICEHIN1056_000510	G_ICEHIN1056_000520	I_traI	I_traK	I_traL	I_traM	I_traN	I_traP	I_traQ	I_traR	I_traW	I_traY
NC_010125	Gluconacetobacter_diazotrophicus_PAl_5,_complete_genome._	Proteobacteria;	Alphaproteobacteria	circular	3944163	3778	NOT4SS	MOB	O	NOT4SS_NOT4CP_MOB_O_784	1520	1520	virb4	traU	t4cp1	t4cp2	t4cp3	MOBC	MOBF	MOBH	MOBPHEN@GLDI001c01_015200&0.866953&5.3e-24	MOBQ	MOBV	MOBT	MOBB	F_traE	F_traH	F_traK	F_traL	F_traN	F_traU	F_traV	F_traW	F_trbC	G_ICEHIN1056_000310	G_ICEHIN1056_000410	G_ICEHIN1056_000440	G_ICEHIN1056_000510	G_ICEHIN1056_000520	I_traI	I_traK	I_traL	I_traM	I_traN	I_traP	I_traQ	I_traR	I_traW	I_traY
NC_010125	Gluconacetobacter_diazotrophicus_PAl_5,_complete_genome._	Proteobacteria;	Alphaproteobacteria	circular	3944163	3778	NOT4SS	MOB	O	NOT4SS_NOT4CP_MOB_O_785	2224	2224	virb4	traU	t4cp1	t4cp2	t4cp3	MOBC	MOBF	MOBH	MOBPHEN	MOBQ@GLDI001c01_022240&1&1.8e-71	MOBV	MOBT	MOBB	F_traE	F_traH	F_traK	F_traL	F_traN	F_traU	F_traV	F_traW	F_trbC	G_ICEHIN1056_000310	G_ICEHIN1056_000410	G_ICEHIN1056_000440	G_ICEHIN1056_000510	G_ICEHIN1056_000520	I_traI	I_traK	I_traL	I_traM	I_traN	I_traP	I_traQ	I_traR	I_traW	I_traY
NC_010125	Gluconacetobacter_diazotrophicus_PAl_5,_complete_genome._	Proteobacteria;	Alphaproteobacteria	circular	3944163	3778	T4SS	CONJ	T	T4SS_T4CP_MOB_T_786	2714	2729	virb4@GLDI001c01_027180&0.825027&3.2e-178	traU	t4cp1@GLDI001c01_027250&1&8.4e-26	t4cp2@GLDI001c01_027250&1&4.9e-54	t4cp3	MOBC	MOBF	MOBH	MOBPHEN@GLDI001c01_027290&0.888412&9.2e-32	MOBQ	MOBV	MOBT	MOBB	F_traE	F_traH	F_traK	F_traL	F_traN	F_traU	F_traV	F_traW	F_trbC	G_ICEHIN1056_000310	G_ICEHIN1056_000410	G_ICEHIN1056_000440	G_ICEHIN1056_000510	G_ICEHIN1056_000520	I_traI	I_traK	I_traL	I_traM	I_traN	I_traP	I_traQ	I_traR	I_traW	I_traY
NC_010125	Gluconacetobacter_diazotrophicus_PAl_5,_complete_genome._	Proteobacteria;	Alphaproteobacteria	circular	3944163	3778	T4SS	CONJ	T	T4SS_T4CP_MOB_T_787	2834	2888	virb4@GLDI001c01_028820&0.821845&3.4e-177	traU	t4cp1@GLDI001c01_028880&1&1.1e-24	t4cp2@GLDI001c01_028880&1&7.2e-54	t4cp3	MOBC	MOBF	MOBH	MOBPHEN@GLDI001c01_028340&0.88412&1.6e-26	MOBQ	MOBV	MOBT	MOBB	F_traE	F_traH	F_traK	F_traL	F_traN	F_traU	F_traV	F_traW	F_trbC	G_ICEHIN1056_000310	G_ICEHIN1056_000410	G_ICEHIN1056_000440	G_ICEHIN1056_000510	G_ICEHIN1056_000520	I_traI	I_traK	I_traL	I_traM	I_traN	I_traP	I_traQ	I_traR	I_traW	I_traY
NC_011365	Gluconacetobacter_diazotrophicus_PAl_5,_complete_genome._	Proteobacteria;	Alphaproteobacteria	circular	3887492	3472	NOT4SS	MOB	O	NOT4SS_NOT4CP_MOB_O_788	463	463	virb4	traU	t4cp1	t4cp2	t4cp3	MOBC	MOBF	MOBH	MOBPHEN	MOBQ@GLDI002c01_004630&1&1.8e-71	MOBV	MOBT	MOBB	F_traE	F_traH	F_traK	F_traL	F_traN	F_traU	F_traV	F_traW	F_trbC	G_ICEHIN1056_000310	G_ICEHIN1056_000410	G_ICEHIN1056_000440	G_ICEHIN1056_000510	G_ICEHIN1056_000520	I_traI	I_traK	I_traL	I_traM	I_traN	I_traP	I_traQ	I_traR	I_traW	I_traY
NC_011365	Gluconacetobacter_diazotrophicus_PAl_5,_complete_genome._	Proteobacteria;	Alphaproteobacteria	circular	3887492	3472	T4SS	CONJ	T	T4SS_T4CP_MOB_T_789A	950	966	virb4@GLDI002c01_009540&0.831389&1.2e-174	traU	t4cp1@GLDI002c01_009590&1&8e-26	t4cp2@GLDI002c01_009590&1&2.3e-53	t4cp3	MOBC	MOBF	MOBH	MOBPHEN@GLDI002c01_009660&0.88412&1.3e-31	MOBQ	MOBV	MOBT	MOBB	F_traE	F_traH	F_traK	F_traL	F_traN	F_traU	F_traV	F_traW	F_trbC	G_ICEHIN1056_000310	G_ICEHIN1056_000410	G_ICEHIN1056_000440	G_ICEHIN1056_000510	G_ICEHIN1056_000520	I_traI	I_traK	I_traL	I_traM	I_traN	I_traP	I_traQ	I_traR	I_traW	I_traY
NC_011365	Gluconacetobacter_diazotrophicus_PAl_5,_complete_genome._	Proteobacteria;	Alphaproteobacteria	circular	3887492	3472	T4SS	CONJ	T	T4SS_T4CP_MOB_T_789B	995	1057	virb4@GLDI002c01_010000&0.80912&3.6e-177	traU	t4cp1@GLDI002c01_010130&1&9.5e-26	t4cp2@GLDI002c01_010130&1&1.4e-54	t4cp3	MOBC	MOBF	MOBH	MOBPHEN@GLDI002c01_010570&0.695279&3.9e-24@GLDI002c01_010160&0.845494&6.6e-28	MOBQ	MOBV	MOBT	MOBB	F_traE	F_traH	F_traK	F_traL	F_traN	F_traU	F_traV	F_traW	F_trbC	G_ICEHIN1056_000310	G_ICEHIN1056_000410	G_ICEHIN1056_000440	G_ICEHIN1056_000510	G_ICEHIN1056_000520	I_traI	I_traK	I_traL	I_traM	I_traN	I_traP	I_traQ	I_traR	I_traW	I_traY
NC_011365	Gluconacetobacter_diazotrophicus_PAl_5,_complete_genome._	Proteobacteria;	Alphaproteobacteria	circular	3887492	3472	NOT4SS	MOB	O	NOT4SS_NOT4CP_MOB_O_790	1599	1599	virb4	traU	t4cp1	t4cp2	t4cp3	MOBC	MOBF	MOBH	MOBPHEN@GLDI002c01_015990&0.879828&6.5e-33	MOBQ	MOBV	MOBT	MOBB	F_traE	F_traH	F_traK	F_traL	F_traN	F_traU	F_traV	F_traW	F_trbC	G_ICEHIN1056_000310	G_ICEHIN1056_000410	G_ICEHIN1056_000440	G_ICEHIN1056_000510	G_ICEHIN1056_000520	I_traI	I_traK	I_traL	I_traM	I_traN	I_traP	I_traQ	I_traR	I_traW	I_traY
NC_011365	Gluconacetobacter_diazotrophicus_PAl_5,_complete_genome._	Proteobacteria;	Alphaproteobacteria	circular	3887492	3472	NOT4SS	MOB	O	NOT4SS_T4CP_MOB_O_791	1725	1732	virb4	traU	t4cp1@GLDI002c01_017250&1&1.3e-25	t4cp2@GLDI002c01_017250&1&6.3e-55	t4cp3	MOBC	MOBF	MOBH	MOBPHEN@GLDI002c01_017320&0.854077&4.6e-29	MOBQ	MOBV	MOBT	MOBB	F_traE	F_traH	F_traK	F_traL	F_traN	F_traU	F_traV	F_traW	F_trbC	G_ICEHIN1056_000310	G_ICEHIN1056_000410	G_ICEHIN1056_000440	G_ICEHIN1056_000510	G_ICEHIN1056_000520	I_traI	I_traK	I_traL	I_traM	I_traN	I_traP	I_traQ	I_traR	I_traW	I_traY
NC_011365	Gluconacetobacter_diazotrophicus_PAl_5,_complete_genome._	Proteobacteria;	Alphaproteobacteria	circular	3887492	3472	T4SS	CONJ	T	T4SS_T4CP_MOB_T_792	2782	2808	virb4@GLDI002c01_028030&0.818664&2.3e-172	traU	t4cp1@GLDI002c01_027940&1&3.4e-26	t4cp2@GLDI002c01_027940&1&9.6e-54	t4cp3	MOBC	MOBF	MOBH	MOBPHEN@GLDI002c01_027820&0.871245&9.9e-31	MOBQ	MOBV	MOBT	MOBB	F_traE	F_traH	F_traK	F_traL	F_traN	F_traU	F_traV	F_traW	F_trbC	G_ICEHIN1056_000310	G_ICEHIN1056_000410	G_ICEHIN1056_000440	G_ICEHIN1056_000510	G_ICEHIN1056_000520	I_traI	I_traK	I_traL	I_traM	I_traN	I_traP	I_traQ	I_traR	I_traW	I_traY
NC_005125	Gloeobacter_violaceus_PCC_7421,_complete_genome._	Cyanobacteria;	Cyanobacteria	circular	4659019	4430	T4SS	NOMOB	O	T4SS_NOT4CP_NOMOB_O_794	622	622	virb4@GLVI001c01_006220&0.569459&2.7e-22	traU	t4cp1	t4cp2	t4cp3	MOBC	MOBF	MOBH	MOBPHEN	MOBQ	MOBV	MOBT	MOBB	F_traE	F_traH	F_traK	F_traL	F_traN	F_traU	F_traV	F_traW	F_trbC	G_ICEHIN1056_000310	G_ICEHIN1056_000410	G_ICEHIN1056_000440	G_ICEHIN1056_000510	G_ICEHIN1056_000520	I_traI	I_traK	I_traL	I_traM	I_traN	I_traP	I_traQ	I_traR	I_traW	I_traY
NC_008343	Granulibacter_bethesdensis_CGDNIH1,_complete_genome._	Proteobacteria;	Alphaproteobacteria	circular	2708355	2437	NOT4SS	MOB	O	NOT4SS_T4CP_MOB_O_800	1554	1556	virb4	traU	t4cp1@GRBE001c01_015540&0.981818&2.9e-13	t4cp2@GRBE001c01_015540&0.671171&6.7e-24	t4cp3	MOBC	MOBF@GRBE001c01_015560&0.576136&2.3e-91&1.5e-48	MOBH	MOBPHEN	MOBQ	MOBV	MOBT	MOBB	F_traE	F_traH	F_traK	F_traL	F_traN	F_traU	F_traV	F_traW	F_trbC	G_ICEHIN1056_000310	G_ICEHIN1056_000410	G_ICEHIN1056_000440	G_ICEHIN1056_000510	G_ICEHIN1056_000520	I_traI	I_traK	I_traL	I_traM	I_traN	I_traP	I_traQ	I_traR	I_traW	I_traY
NC_008571	Gramella_forsetii_KT0803,_complete_genome._	Bacteroidetes;	Bacteroidetes	circular	3798465	3584	T4SS	CONJ	O	T4SS_T4CP_MOB_O_801	1355	1366	virb4@GRFO001c01_013650&0.800636&2.8e-65	traU	t4cp1	t4cp2@GRFO001c01_013560&0.95045&5.5e-19	t4cp3	MOBC	MOBF	MOBH	MOBPHEN	MOBQ	MOBV	MOBT	MOBB@GRFO001c01_013550&1&1.4e-90	F_traE	F_traH	F_traK	F_traL	F_traN	F_traU	F_traV	F_traW	F_trbC	G_ICEHIN1056_000310	G_ICEHIN1056_000410	G_ICEHIN1056_000440	G_ICEHIN1056_000510	G_ICEHIN1056_000520	I_traI	I_traK	I_traL	I_traM	I_traN	I_traP	I_traQ	I_traR	I_traW	I_traY
NC_012751	Candidatus_Hamiltonella_defensa_5AT_(Acyrthosiphon_pisum),_complete_genome._	Proteobacteria;	Gammaproteobacteria	circular	2110331	2094	NOT4SS	MOB	O	NOT4SS_NOT4CP_MOB_O_806	249	249	virb4	traU	t4cp1	t4cp2	t4cp3	MOBC	MOBF	MOBH	MOBPHEN@HADE001c01_002490&0.939914&1.8e-50	MOBQ	MOBV	MOBT	MOBB	F_traE	F_traH	F_traK	F_traL	F_traN	F_traU	F_traV	F_traW	F_trbC	G_ICEHIN1056_000310	G_ICEHIN1056_000410	G_ICEHIN1056_000440	G_ICEHIN1056_000510	G_ICEHIN1056_000520	I_traI	I_traK	I_traL	I_traM	I_traN	I_traP	I_traQ	I_traR	I_traW	I_traY
NC_012751	Candidatus_Hamiltonella_defensa_5AT_(Acyrthosiphon_pisum),_complete_genome._	Proteobacteria;	Gammaproteobacteria	circular	2110331	2094	NOT4SS	MOB	T	NOT4SS_NOT4CP_MOB_T_807	391	405	virb4	traU	t4cp1@HADE001c01_003910&0.990909&4.6e-28	t4cp2	t4cp3	MOBC	MOBF	MOBH	MOBPHEN@HADE001c01_003970&0.95279&3.5e-34	MOBQ	MOBV	MOBT	MOBB	F_traE	F_traH	F_traK	F_traL	F_traN	F_traU	F_traV	F_traW	F_trbC	G_ICEHIN1056_000310	G_ICEHIN1056_000410	G_ICEHIN1056_000440	G_ICEHIN1056_000510	G_ICEHIN1056_000520	I_traI	I_traK	I_traL	I_traM	I_traN	I_traP	I_traQ	I_traR	I_traW	I_traY
NC_012751	Candidatus_Hamiltonella_defensa_5AT_(Acyrthosiphon_pisum),_complete_genome._	Proteobacteria;	Gammaproteobacteria	circular	2110331	2094	NOT4SS	NOMOB	O	NOT4SS_T4CP_NOMOB_O_808	693	693	virb4	traU	t4cp1	t4cp2@HADE001c01_006930&0.630631&2.5e-18	t4cp3	MOBC	MOBF	MOBH	MOBPHEN	MOBQ	MOBV	MOBT	MOBB	F_traE	F_traH	F_traK	F_traL	F_traN	F_traU	F_traV	F_traW	F_trbC	G_ICEHIN1056_000310	G_ICEHIN1056_000410	G_ICEHIN1056_000440	G_ICEHIN1056_000510	G_ICEHIN1056_000520	I_traI	I_traK	I_traL	I_traM	I_traN	I_traP	I_traQ	I_traR	I_traW	I_traY
NC_012751	Candidatus_Hamiltonella_defensa_5AT_(Acyrthosiphon_pisum),_complete_genome._	Proteobacteria;	Gammaproteobacteria	circular	2110331	2094	T4SS	NOMOB	I	T4SS_NOT4CP_MOB_I_809_O_810	900	987	virb4@HADE001c01_009110&0.517497&3.6e-18	traU@HADE001c01_009110&0.988095&0	t4cp1@HADE001c01_009200&1&6.3e-20	t4cp2	t4cp3	MOBC	MOBF	MOBH	MOBPHEN@HADE001c01_009870&0.7897&1e-26	MOBQ	MOBV	MOBT	MOBB	F_traE	F_traH	F_traK	F_traL	F_traN	F_traU	F_traV	F_traW	F_trbC	G_ICEHIN1056_000310	G_ICEHIN1056_000410	G_ICEHIN1056_000440	G_ICEHIN1056_000510	G_ICEHIN1056_000520	I_traI@HADE001c01_009000&0.897436&1.1e-91	I_traK@HADE001c01_009040&0.965517&8.9e-33	I_traL@HADE001c01_009060&0.923077&1e-45	I_traM@HADE001c01_009070&0.921397&2.8e-73	I_traN@HADE001c01_009080&0.964286&1.2e-97	I_traP	I_traQ	I_traR	I_traW@HADE001c01_009120&0.928395&2.6e-150	I_traY
NC_012751	Candidatus_Hamiltonella_defensa_5AT_(Acyrthosiphon_pisum),_complete_genome._	Proteobacteria;	Gammaproteobacteria	circular	2110331	2094	NOT4SS	MOB	T	NOT4SS_T4CP_MOB_T_811	1221	1293	virb4	traU	t4cp1@HADE001c01_012280&0.972727&4e-22	t4cp2@HADE001c01_012890&0.630631&2.5e-18@HADE001c01_012280&0.986486&3.3e-51	t4cp3	MOBC	MOBF	MOBH	MOBPHEN@HADE001c01_012850&0.939914&9.9e-50	MOBQ	MOBV	MOBT	MOBB	F_traE	F_traH	F_traK	F_traL	F_traN	F_traU	F_traV	F_traW	F_trbC	G_ICEHIN1056_000310	G_ICEHIN1056_000410	G_ICEHIN1056_000440	G_ICEHIN1056_000510	G_ICEHIN1056_000520	I_traI@HADE001c01_012930&0.897436&2.2e-94	I_traK@HADE001c01_012910&0.954023&1.4e-31	I_traL	I_traM	I_traN	I_traP	I_traQ	I_traR	I_traW	I_traY
NC_002940	Haemophilus_ducreyi_35000HP,_complete_genome._	Proteobacteria;	Gammaproteobacteria	circular	1698955	1717	T4SS	MOB	G	T4SS_NOT4CP_MOB_G_812	796	831	virb4@HADU001c01_008270&0.657476&7.2e-76	traU	t4cp1	t4cp2	t4cp3	MOBC	MOBF	MOBH@HADU001c01_007960&0.926471&1.7e-51	MOBPHEN	MOBQ	MOBV	MOBT	MOBB	F_traE	F_traH	F_traK	F_traL	F_traN	F_traU	F_traV	F_traW	F_trbC	G_ICEHIN1056_000310	G_ICEHIN1056_000410@HADU001c01_008310&0.837104&8.1e-76	G_ICEHIN1056_000440@HADU001c01_008280&0.92029&9e-46	G_ICEHIN1056_000510@HADU001c01_008170&0.960613&4.3e-195	G_ICEHIN1056_000520@HADU001c01_008160&0.643505&3.2e-93	I_traI	I_traK	I_traL	I_traM	I_traN	I_traP@HADU001c01_008290&0.573222&0.00029	I_traQ	I_traR	I_traW	I_traY
NC_007146	Haemophilus_influenzae_86-028NP,_complete_genome._	Proteobacteria;	Gammaproteobacteria	circular	1914490	1792	T4SS	CONJ	G	T4SS_T4CP_MOB_G_815	108	150	virb4@HAIN002c01_001210&0.893955&6.2e-125	traU	t4cp1@HAIN002c01_001120&0.990909&2.9e-12	t4cp2@HAIN002c01_001120&0.990991&4e-35	t4cp3	MOBC	MOBF	MOBH@HAIN002c01_001500&0.970588&3.4e-56	MOBPHEN	MOBQ	MOBV	MOBT	MOBB	F_traE	F_traH	F_traK	F_traL	F_traN	F_traU	F_traV	F_traW	F_trbC	G_ICEHIN1056_000310@HAIN002c01_001080&0.920792&1.5e-61	G_ICEHIN1056_000410@HAIN002c01_001170&0.945701&2.8e-93	G_ICEHIN1056_000440@HAIN002c01_001200&0.978261&4.2e-52	G_ICEHIN1056_000510@HAIN002c01_001320&0.991247&4.8e-213	G_ICEHIN1056_000520@HAIN002c01_001330&0.957704&9e-131	I_traI	I_traK	I_traL	I_traM	I_traN	I_traP	I_traQ	I_traR	I_traW	I_traY
NC_012028	Halorubrum_lacusprofundi_ATCC_49239_chromosome_2,_complete_genome._	Euryarchaeota;	Euryarchaeota	circular	525943	473	T4SS	NOMOB	O	T4SS_T4CP_NOMOB_O_816	199	201	virb4@HALA001c02_001990&0.577943&1.6e-67	traU	t4cp1	t4cp2@HALA001c02_002010&0.531532&6.5e-11	t4cp3	MOBC	MOBF	MOBH	MOBPHEN	MOBQ	MOBV	MOBT	MOBB	F_traE	F_traH	F_traK	F_traL	F_traN	F_traU	F_traV	F_traW	F_trbC	G_ICEHIN1056_000310	G_ICEHIN1056_000410	G_ICEHIN1056_000440	G_ICEHIN1056_000510	G_ICEHIN1056_000520	I_traI	I_traK	I_traL	I_traM	I_traN	I_traP	I_traQ	I_traR	I_traW	I_traY
NC_012028	Halorubrum_lacusprofundi_ATCC_49239_chromosome_2,_complete_genome._	Euryarchaeota;	Euryarchaeota	circular	525943	473	T4SS	NOMOB	O	T4SS_T4CP_NOMOB_O_817	397	399	virb4@HALA001c02_003990&0.611877&3.2e-64	traU	t4cp1	t4cp2@HALA001c02_003970&0.671171&7e-15	t4cp3	MOBC	MOBF	MOBH	MOBPHEN	MOBQ	MOBV	MOBT	MOBB	F_traE	F_traH	F_traK	F_traL	F_traN	F_traU	F_traV	F_traW	F_trbC	G_ICEHIN1056_000310	G_ICEHIN1056_000410	G_ICEHIN1056_000440	G_ICEHIN1056_000510	G_ICEHIN1056_000520	I_traI	I_traK	I_traL	I_traM	I_traN	I_traP	I_traQ	I_traR	I_traW	I_traY
NC_006396	Haloarcula_marismortui_ATCC_43049_chromosome_I,_complete_sequence._	Euryarchaeota;	Euryarchaeota	circular	3131724	3131	T4SS	NOMOB	O	T4SS_T4CP_NOMOB_O_818	951	951	virb4@HAMA001c01_009510&0.550371&5.2e-69	traU	t4cp1	t4cp2@HAMA001c01_009510&0.581081&2.9e-08	t4cp3	MOBC	MOBF	MOBH	MOBPHEN	MOBQ	MOBV	MOBT	MOBB	F_traE	F_traH	F_traK	F_traL	F_traN	F_traU	F_traV	F_traW	F_trbC	G_ICEHIN1056_000310	G_ICEHIN1056_000410	G_ICEHIN1056_000440	G_ICEHIN1056_000510	G_ICEHIN1056_000520	I_traI	I_traK	I_traL	I_traM	I_traN	I_traP	I_traQ	I_traR	I_traW	I_traY
NC_013422	Halothiobacillus_neapolitanus_c2,_complete_genome._	Proteobacteria;	Gammaproteobacteria	circular	2582886	2357	NOT4SS	MOB	O	NOT4SS_NOT4CP_MOB_O_820	366	366	virb4	traU	t4cp1	t4cp2	t4cp3	MOBC	MOBF	MOBH	MOBPHEN@HANE001c01_003660&0.944206&1.4e-24	MOBQ	MOBV	MOBT	MOBB	F_traE	F_traH	F_traK	F_traL	F_traN	F_traU	F_traV	F_traW	F_trbC	G_ICEHIN1056_000310	G_ICEHIN1056_000410	G_ICEHIN1056_000440	G_ICEHIN1056_000510	G_ICEHIN1056_000520	I_traI	I_traK	I_traL	I_traM	I_traN	I_traP	I_traQ	I_traR	I_traW	I_traY
NC_013422	Halothiobacillus_neapolitanus_c2,_complete_genome._	Proteobacteria;	Gammaproteobacteria	circular	2582886	2357	NOT4SS	MOB	O	NOT4SS_NOT4CP_MOB_O_821	483	483	virb4	traU	t4cp1	t4cp2	t4cp3	MOBC	MOBF	MOBH	MOBPHEN@HANE001c01_004830&0.948498&6.2e-31	MOBQ	MOBV	MOBT	MOBB	F_traE	F_traH	F_traK	F_traL	F_traN	F_traU	F_traV	F_traW	F_trbC	G_ICEHIN1056_000310	G_ICEHIN1056_000410	G_ICEHIN1056_000440	G_ICEHIN1056_000510	G_ICEHIN1056_000520	I_traI	I_traK	I_traL	I_traM	I_traN	I_traP	I_traQ	I_traR	I_traW	I_traY
NC_013422	Halothiobacillus_neapolitanus_c2,_complete_genome._	Proteobacteria;	Gammaproteobacteria	circular	2582886	2357	NOT4SS	MOB	O	NOT4SS_NOT4CP_MOB_O_822	946	946	virb4	traU	t4cp1	t4cp2	t4cp3	MOBC	MOBF@HANE001c01_009460&0.998864&5.3e-190	MOBH	MOBPHEN	MOBQ	MOBV	MOBT	MOBB	F_traE	F_traH	F_traK	F_traL	F_traN	F_traU	F_traV	F_traW	F_trbC	G_ICEHIN1056_000310	G_ICEHIN1056_000410	G_ICEHIN1056_000440	G_ICEHIN1056_000510	G_ICEHIN1056_000520	I_traI	I_traK	I_traL	I_traM	I_traN	I_traP	I_traQ	I_traR	I_traW	I_traY
NC_013422	Halothiobacillus_neapolitanus_c2,_complete_genome._	Proteobacteria;	Gammaproteobacteria	circular	2582886	2357	T4SS	CONJ	T	T4SS_T4CP_MOB_T_823	1619	1669	virb4@HANE001c01_016220&0.817603&3.6e-182	traU	t4cp1@HANE001c01_016520&1&1.5e-24	t4cp2@HANE001c01_016520&1&8.4e-63	t4cp3	MOBC	MOBF	MOBH	MOBPHEN@HANE001c01_016460&0.678112&2e-15	MOBQ	MOBV	MOBT	MOBB	F_traE	F_traH	F_traK	F_traL	F_traN	F_traU	F_traV	F_traW	F_trbC	G_ICEHIN1056_000310	G_ICEHIN1056_000410	G_ICEHIN1056_000440	G_ICEHIN1056_000510	G_ICEHIN1056_000520	I_traI	I_traK	I_traL	I_traM	I_traN	I_traP	I_traQ	I_traR	I_traW	I_traY
NC_008309	Haemophilus_somnus_129PT,_complete_genome._	Proteobacteria;	Gammaproteobacteria	circular	2007700	1792	T4SS	CONJ	G	T4SS_T4CP_MOB_G_828	1817	1863	virb4@HASO001c01_018350&0.830329&2.8e-105	traU	t4cp1@HASO001c01_018220&0.990909&4.8e-13	t4cp2@HASO001c01_018220&0.986486&1.6e-36	t4cp3	MOBC	MOBF	MOBH@HASO001c01_018630&0.960784&4.3e-47	MOBPHEN	MOBQ	MOBV	MOBT	MOBB	F_traE	F_traH	F_traK@HASO001c01_018320&0.510791&0.0003	F_traL	F_traN	F_traU	F_traV	F_traW	F_trbC	G_ICEHIN1056_000310@HASO001c01_018170&0.910891&1.1e-54	G_ICEHIN1056_000410@HASO001c01_018310&0.954751&5.4e-95	G_ICEHIN1056_000440@HASO001c01_018340&0.934783&4.1e-51	G_ICEHIN1056_000510@HASO001c01_018450&0.989059&2.1e-207	G_ICEHIN1056_000520@HASO001c01_018460&0.969789&2.3e-128	I_traI	I_traK	I_traL	I_traM	I_traN	I_traP	I_traQ	I_traR	I_traW	I_traY
NC_010519	Haemophilus_somnus_2336,_complete_genome._	Proteobacteria;	Gammaproteobacteria	circular	2263857	1980	NOT4SS	MOB	O	NOT4SS_NOT4CP_MOB_O_829	457	457	virb4	traU	t4cp1	t4cp2	t4cp3	MOBC	MOBF@HASO002c01_004570&0.501136&3.8e-21	MOBH	MOBPHEN	MOBQ	MOBV	MOBT	MOBB	F_traE	F_traH	F_traK	F_traL	F_traN	F_traU	F_traV	F_traW	F_trbC	G_ICEHIN1056_000310	G_ICEHIN1056_000410	G_ICEHIN1056_000440	G_ICEHIN1056_000510	G_ICEHIN1056_000520	I_traI	I_traK	I_traL	I_traM	I_traN	I_traP	I_traQ	I_traR	I_traW	I_traY
NC_010519	Haemophilus_somnus_2336,_complete_genome._	Proteobacteria;	Gammaproteobacteria	circular	2263857	1980	NOT4SS	MOB	O	NOT4SS_NOT4CP_MOB_O_830	1212	1212	virb4	traU	t4cp1	t4cp2	t4cp3	MOBC	MOBF	MOBH	MOBPHEN@HASO002c01_012120&0.502146&1.3e-18	MOBQ	MOBV	MOBT	MOBB	F_traE	F_traH	F_traK	F_traL	F_traN	F_traU	F_traV	F_traW	F_trbC	G_ICEHIN1056_000310	G_ICEHIN1056_000410	G_ICEHIN1056_000440	G_ICEHIN1056_000510	G_ICEHIN1056_000520	I_traI	I_traK	I_traL	I_traM	I_traN	I_traP	I_traQ	I_traR	I_traW	I_traY
NC_010519	Haemophilus_somnus_2336,_complete_genome._	Proteobacteria;	Gammaproteobacteria	circular	2263857	1980	T4SS	NOMOB	G	T4SS_T4CP_NOMOB_G_831	1712	1736	virb4@HASO002c01_017200&0.838812&7.9e-104	traU	t4cp1@HASO002c01_017320&0.990909&7.5e-13	t4cp2@HASO002c01_017320&0.941441&2.3e-33	t4cp3	MOBC	MOBF	MOBH	MOBPHEN	MOBQ	MOBV	MOBT	MOBB	F_traE	F_traH	F_traK	F_traL	F_traN	F_traU	F_traV	F_traW	F_trbC	G_ICEHIN1056_000310@HASO002c01_017360&0.89604&7.9e-57	G_ICEHIN1056_000410@HASO002c01_017240&0.959276&1.4e-95	G_ICEHIN1056_000440@HASO002c01_017210&0.927536&1.3e-48	G_ICEHIN1056_000510@HASO002c01_017130&0.982495&1.1e-207	G_ICEHIN1056_000520@HASO002c01_017120&0.942598&4.9e-127	I_traI	I_traK	I_traL	I_traM	I_traN	I_traP	I_traQ	I_traR	I_traW	I_traY
NC_013158	Halorhabdus_utahensis_DSM_12940,_complete_genome._	Euryarchaeota;	Euryarchaeota	circular	3116795	2998	T4SS	NOMOB	O	T4SS_T4CP_NOMOB_O_832	1696	1697	virb4@HAUT001c01_016960&0.579003&7e-68	traU	t4cp1	t4cp2@HAUT001c01_016970&0.608108&1.2e-09@HAUT001c01_016960&0.536036&2.9e-05	t4cp3	MOBC	MOBF	MOBH	MOBPHEN	MOBQ	MOBV	MOBT	MOBB	F_traE	F_traH	F_traK	F_traL	F_traN	F_traU	F_traV	F_traW	F_trbC	G_ICEHIN1056_000310	G_ICEHIN1056_000410	G_ICEHIN1056_000440	G_ICEHIN1056_000510	G_ICEHIN1056_000520	I_traI	I_traK	I_traL	I_traM	I_traN	I_traP	I_traQ	I_traR	I_traW	I_traY
NC_013967	Haloferax_volcanii_DS2_chromosome,_complete_genome._	Euryarchaeota;	Euryarchaeota	circular	2847757	2945	T4SS	NOMOB	O	T4SS_T4CP_NOMOB_O_833	2259	2262	virb4@HAVO001c01_022620&0.622481&2.4e-35&4.1e-10	traU	t4cp1	t4cp2@HAVO001c01_022590&0.63964&3.7e-13	t4cp3	MOBC	MOBF	MOBH	MOBPHEN	MOBQ	MOBV	MOBT	MOBB	F_traE	F_traH	F_traK	F_traL	F_traN	F_traU	F_traV	F_traW	F_trbC	G_ICEHIN1056_000310	G_ICEHIN1056_000410	G_ICEHIN1056_000440	G_ICEHIN1056_000510	G_ICEHIN1056_000520	I_traI	I_traK	I_traL	I_traM	I_traN	I_traP	I_traQ	I_traR	I_traW	I_traY
NC_008212	Haloquadratum_walsbyi_DSM_16790,_complete_genome._	Euryarchaeota;	Euryarchaeota	circular	3132494	2610	T4SS	NOMOB	O	T4SS_T4CP_NOMOB_O_834	2241	2243	virb4@HAWA001c01_022410&0.675504&4e-44&4.5e-15	traU	t4cp1	t4cp2@HAWA001c01_022430&0.662162&3.7e-15	t4cp3	MOBC	MOBF	MOBH	MOBPHEN	MOBQ	MOBV	MOBT	MOBB	F_traE	F_traH	F_traK	F_traL	F_traN	F_traU	F_traV	F_traW	F_trbC	G_ICEHIN1056_000310	G_ICEHIN1056_000410	G_ICEHIN1056_000440	G_ICEHIN1056_000510	G_ICEHIN1056_000520	I_traI	I_traK	I_traL	I_traM	I_traN	I_traP	I_traQ	I_traR	I_traW	I_traY
NC_008229	Helicobacter_acinonychis_str._Sheeba,_complete_genome._	Proteobacteria;	Epsilonproteobacteria	circular	1553927	1612	T4SS	NOMOB	O	T4SS_NOT4CP_NOMOB_O_836	1566	1566	virb4@HEAC001c01_015660&0.806999&1.5e-94	traU	t4cp1	t4cp2	t4cp3	MOBC	MOBF	MOBH	MOBPHEN	MOBQ	MOBV	MOBT	MOBB	F_traE	F_traH	F_traK	F_traL	F_traN	F_traU	F_traV	F_traW	F_trbC	G_ICEHIN1056_000310	G_ICEHIN1056_000410	G_ICEHIN1056_000440	G_ICEHIN1056_000510	G_ICEHIN1056_000520	I_traI	I_traK	I_traL	I_traM	I_traN	I_traP	I_traQ	I_traR	I_traW	I_traY
NC_009138	Herminiimonas_arsenicoxydans,_complete_genome._	Proteobacteria;	Betaproteobacteria	circular	3424307	3295	NOT4SS	MOB	O	NOT4SS_NOT4CP_MOB_O_837	651	651	virb4	traU	t4cp1	t4cp2	t4cp3	MOBC	MOBF	MOBH	MOBPHEN	MOBQ@HEAR001c01_006510&1&3.4e-42	MOBV	MOBT	MOBB	F_traE	F_traH	F_traK	F_traL	F_traN	F_traU	F_traV	F_traW	F_trbC	G_ICEHIN1056_000310	G_ICEHIN1056_000410	G_ICEHIN1056_000440	G_ICEHIN1056_000510	G_ICEHIN1056_000520	I_traI	I_traK	I_traL	I_traM	I_traN	I_traP	I_traQ	I_traR	I_traW	I_traY
NC_009138	Herminiimonas_arsenicoxydans,_complete_genome._	Proteobacteria;	Betaproteobacteria	circular	3424307	3295	T4SS	CONJ	G	T4SS_T4CP_MOB_G_838	1914	1944	virb4@HEAR001c01_019330&0.793213&1.2e-86	traU	t4cp1@HEAR001c01_019190&0.990909&1.3e-10	t4cp2@HEAR001c01_019190&0.954955&2.1e-30	t4cp3	MOBC	MOBF	MOBH@HEAR001c01_019440&0.906863&7.9e-43	MOBPHEN	MOBQ	MOBV	MOBT	MOBB	F_traE	F_traH	F_traK	F_traL	F_traN	F_traU	F_traV	F_traW	F_trbC	G_ICEHIN1056_000310@HEAR001c01_019140&0.970297&1.6e-75	G_ICEHIN1056_000410@HEAR001c01_019290&0.959276&2.5e-109	G_ICEHIN1056_000440@HEAR001c01_019320&0.978261&3.2e-65	G_ICEHIN1056_000510@HEAR001c01_019380&0.908096&2.4e-196	G_ICEHIN1056_000520@HEAR001c01_019370&0.993958&5.7e-151	I_traI	I_traK	I_traL	I_traM	I_traN	I_traP	I_traQ	I_traR	I_traW	I_traY
NC_010337	Heliobacterium_modesticaldum_Ice1,_complete_genome._	Firmicutes;	Firmicutes	circular	3075407	3000	T4SS	CONJ	O	T4SS_T4CP_MOB_O_840	602	619	virb4@HEMO001c01_006020&0.538706&6.8e-63	traU	t4cp1@HEMO001c01_006190&0.990909&3.3e-10	t4cp2@HEMO001c01_006190&0.963964&5.5e-46	t4cp3	MOBC	MOBF	MOBH	MOBPHEN@HEMO001c01_006160&0.532189&3.7e-08	MOBQ	MOBV	MOBT	MOBB	F_traE	F_traH	F_traK	F_traL	F_traN	F_traU	F_traV	F_traW	F_trbC	G_ICEHIN1056_000310	G_ICEHIN1056_000410	G_ICEHIN1056_000440	G_ICEHIN1056_000510	G_ICEHIN1056_000520	I_traI	I_traK	I_traL	I_traM	I_traN	I_traP	I_traQ	I_traR	I_traW	I_traY
NC_000915	Helicobacter_pylori_26695,_complete_genome._	Proteobacteria;	Epsilonproteobacteria	circular	1667867	1576	T4SS	NOMOB	O	T4SS_NOT4CP_NOMOB_O_842	22	43	virb4@HEPY001c01_000220&0.806999&1.4e-96	traU	t4cp1	t4cp2	t4cp3	MOBC	MOBF	MOBH	MOBPHEN	MOBQ	MOBV	MOBT	MOBB	F_traE	F_traH	F_traK	F_traL	F_traN	F_traU	F_traV	F_traW	F_trbC	G_ICEHIN1056_000310	G_ICEHIN1056_000410	G_ICEHIN1056_000440	G_ICEHIN1056_000510	G_ICEHIN1056_000520	I_traI	I_traK	I_traL	I_traM	I_traN	I_traP	I_traQ	I_traR	I_traW	I_traY
NC_000915	Helicobacter_pylori_26695,_complete_genome._	Proteobacteria;	Epsilonproteobacteria	circular	1667867	1576	T4SS	NOMOB	O	T4SS_T4CP_NOMOB_O_843	454	474	virb4@HEPY001c01_004740&0.815483&2e-96@HEPY001c01_004560&0.802757&2.6e-91	traU	t4cp1	t4cp2@HEPY001c01_004740&0.527027&1.5e-09	t4cp3	MOBC	MOBF	MOBH	MOBPHEN	MOBQ	MOBV	MOBT	MOBB	F_traE	F_traH	F_traK	F_traL@HEPY001c01_004570&0.58&3.8e-05	F_traN	F_traU	F_traV	F_traW	F_trbC	G_ICEHIN1056_000310	G_ICEHIN1056_000410	G_ICEHIN1056_000440	G_ICEHIN1056_000510	G_ICEHIN1056_000520	I_traI	I_traK	I_traL	I_traM	I_traN	I_traP	I_traQ	I_traR	I_traW	I_traY
NC_000915	Helicobacter_pylori_26695,_complete_genome._	Proteobacteria;	Epsilonproteobacteria	circular	1667867	1576	T4SS	NOMOB	O	T4SS_T4CP_NOMOB_O_844	537	557	virb4@HEPY001c01_005570&0.854719&1.7e-128	traU	t4cp1@HEPY001c01_005370&0.927273&1.8e-18	t4cp2@HEPY001c01_005370&0.986486&7.9e-37	t4cp3	MOBC	MOBF	MOBH	MOBPHEN	MOBQ	MOBV	MOBT	MOBB	F_traE	F_traH	F_traK	F_traL	F_traN	F_traU	F_traV	F_traW	F_trbC	G_ICEHIN1056_000310	G_ICEHIN1056_000410	G_ICEHIN1056_000440	G_ICEHIN1056_000510	G_ICEHIN1056_000520	I_traI	I_traK	I_traL	I_traM	I_traN	I_traP	I_traQ	I_traR	I_traW	I_traY
NC_000915	Helicobacter_pylori_26695,_complete_genome._	Proteobacteria;	Epsilonproteobacteria	circular	1667867	1576	NOT4SS	MOB	O	NOT4SS_T4CP_MOB_O_845	1012	1022	virb4	traU	t4cp1	t4cp2@HEPY001c01_010220&0.653153&1.5e-28	t4cp3	MOBC	MOBF	MOBH	MOBPHEN@HEPY001c01_010200&0.579399&1e-13@HEPY001c01_010120&0.703863&3.1e-10	MOBQ	MOBV	MOBT	MOBB	F_traE	F_traH	F_traK	F_traL	F_traN	F_traU	F_traV	F_traW	F_trbC	G_ICEHIN1056_000310	G_ICEHIN1056_000410	G_ICEHIN1056_000440	G_ICEHIN1056_000510	G_ICEHIN1056_000520	I_traI	I_traK	I_traL	I_traM	I_traN	I_traP	I_traQ	I_traR	I_traW	I_traY
NC_000921	Helicobacter_pylori_J99,_complete_genome._	Proteobacteria;	Epsilonproteobacteria	circular	1643831	1489	T4SS	NOMOB	T	T4SS_NOT4CP_NOMOB_T_846	20	40	virb4@HEPY002c01_000200&0.806999&2.6e-95	traU	t4cp1	t4cp2	t4cp3	MOBC	MOBF	MOBH	MOBPHEN	MOBQ	MOBV	MOBT	MOBB	F_traE	F_traH	F_traK	F_traL	F_traN	F_traU	F_traV	F_traW	F_trbC	G_ICEHIN1056_000310	G_ICEHIN1056_000410	G_ICEHIN1056_000440	G_ICEHIN1056_000510	G_ICEHIN1056_000520	I_traI	I_traK	I_traL	I_traM	I_traN	I_traP	I_traQ	I_traR	I_traW	I_traY
NC_000921	Helicobacter_pylori_J99,_complete_genome._	Proteobacteria;	Epsilonproteobacteria	circular	1643831	1489	T4SS	NOMOB	O	T4SS_T4CP_NOMOB_O_847	481	500	virb4@HEPY002c01_005000&0.854719&5.4e-130	traU	t4cp1@HEPY002c01_004810&0.927273&1.8e-18	t4cp2@HEPY002c01_004810&0.986486&1e-36	t4cp3	MOBC	MOBF	MOBH	MOBPHEN	MOBQ	MOBV	MOBT	MOBB	F_traE	F_traH	F_traK	F_traL	F_traN	F_traU	F_traV	F_traW	F_trbC	G_ICEHIN1056_000310	G_ICEHIN1056_000410	G_ICEHIN1056_000440	G_ICEHIN1056_000510	G_ICEHIN1056_000520	I_traI	I_traK	I_traL	I_traM	I_traN	I_traP	I_traQ	I_traR	I_traW	I_traY
NC_000921	Helicobacter_pylori_J99,_complete_genome._	Proteobacteria;	Epsilonproteobacteria	circular	1643831	1489	NOT4SS	MOB	O	NOT4SS_NOT4CP_MOB_O_848	937	964	virb4	traU	t4cp1	t4cp2	t4cp3	MOBC	MOBF	MOBH	MOBPHEN@HEPY002c01_009570&0.703863&2.1e-10	MOBQ	MOBV	MOBT	MOBB	F_traE	F_traH	F_traK	F_traL	F_traN	F_traU	F_traV	F_traW	F_trbC	G_ICEHIN1056_000310	G_ICEHIN1056_000410	G_ICEHIN1056_000440	G_ICEHIN1056_000510	G_ICEHIN1056_000520	I_traI	I_traK	I_traL	I_traM	I_traN	I_traP	I_traQ	I_traR	I_traW	I_traY
NC_008086	Helicobacter_pylori_HPAG1,_complete_genome._	Proteobacteria;	Epsilonproteobacteria	circular	1596366	1536	T4SS	NOMOB	T	T4SS_NOT4CP_NOMOB_T_849	23	44	virb4@HEPY003c01_000230&0.806999&8.8e-94	traU	t4cp1	t4cp2	t4cp3	MOBC	MOBF	MOBH	MOBPHEN	MOBQ	MOBV	MOBT	MOBB	F_traE	F_traH	F_traK	F_traL	F_traN	F_traU	F_traV	F_traW	F_trbC	G_ICEHIN1056_000310	G_ICEHIN1056_000410	G_ICEHIN1056_000440	G_ICEHIN1056_000510	G_ICEHIN1056_000520	I_traI	I_traK	I_traL	I_traM	I_traN	I_traP	I_traQ	I_traR	I_traW	I_traY
NC_008086	Helicobacter_pylori_HPAG1,_complete_genome._	Proteobacteria;	Epsilonproteobacteria	circular	1596366	1536	NOT4SS	NOMOB	O	NOT4SS_T4CP_NOMOB_O_850	512	519	virb4	traU	t4cp1@HEPY003c01_005120&0.927273&1.8e-18	t4cp2@HEPY003c01_005120&0.986486&1e-36	t4cp3	MOBC	MOBF	MOBH	MOBPHEN	MOBQ	MOBV	MOBT	MOBB	F_traE	F_traH	F_traK	F_traL	F_traN	F_traU	F_traV	F_traW	F_trbC	G_ICEHIN1056_000310	G_ICEHIN1056_000410	G_ICEHIN1056_000440	G_ICEHIN1056_000510	G_ICEHIN1056_000520	I_traI	I_traK	I_traL	I_traM	I_traN	I_traP	I_traQ	I_traR	I_traW	I_traY
NC_010698	Helicobacter_pylori_Shi470,_complete_genome._	Proteobacteria;	Epsilonproteobacteria	circular	1608548	1569	T4SS	NOMOB	T	T4SS_NOT4CP_NOMOB_T_851	21	43	virb4@HEPY004c01_000210&0.806999&6.1e-96	traU	t4cp1	t4cp2	t4cp3	MOBC	MOBF	MOBH	MOBPHEN	MOBQ	MOBV	MOBT	MOBB	F_traE	F_traH	F_traK	F_traL	F_traN	F_traU	F_traV	F_traW	F_trbC	G_ICEHIN1056_000310	G_ICEHIN1056_000410	G_ICEHIN1056_000440	G_ICEHIN1056_000510	G_ICEHIN1056_000520	I_traI	I_traK	I_traL	I_traM	I_traN	I_traP	I_traQ	I_traR	I_traW	I_traY
NC_010698	Helicobacter_pylori_Shi470,_complete_genome._	Proteobacteria;	Epsilonproteobacteria	circular	1608548	1569	T4SS	NOMOB	O	T4SS_T4CP_NOMOB_O_852A	813	841	virb4@HEPY004c01_008130&0.854719&1.4e-129	traU	t4cp1@HEPY004c01_008410&0.927273&1.3e-18	t4cp2@HEPY004c01_008410&0.986486&7.9e-37	t4cp3	MOBC	MOBF	MOBH	MOBPHEN	MOBQ	MOBV	MOBT	MOBB	F_traE	F_traH	F_traK	F_traL	F_traN	F_traU	F_traV	F_traW	F_trbC	G_ICEHIN1056_000310	G_ICEHIN1056_000410	G_ICEHIN1056_000440	G_ICEHIN1056_000510	G_ICEHIN1056_000520	I_traI	I_traK	I_traL	I_traM	I_traN	I_traP	I_traQ	I_traR	I_traW	I_traY
NC_010698	Helicobacter_pylori_Shi470,_complete_genome._	Proteobacteria;	Epsilonproteobacteria	circular	1608548	1569	T4SS	CONJ	T	T4SS_T4CP_MOB_T_852B	877	903	virb4@HEPY004c01_009030&0.815483&1e-86	traU	t4cp1@HEPY004c01_008890&0.972727&2.2e-21	t4cp2@HEPY004c01_008890&0.981982&4.5e-37	t4cp3	MOBC	MOBF	MOBH	MOBPHEN@HEPY004c01_008860&0.579399&1.1e-13	MOBQ	MOBV	MOBT	MOBB	F_traE	F_traH	F_traK	F_traL	F_traN	F_traU	F_traV	F_traW	F_trbC	G_ICEHIN1056_000310	G_ICEHIN1056_000410	G_ICEHIN1056_000440	G_ICEHIN1056_000510	G_ICEHIN1056_000520	I_traI	I_traK	I_traL	I_traM	I_traN	I_traP	I_traQ	I_traR	I_traW	I_traY
NC_011333	Helicobacter_pylori_G27,_complete_genome._	Proteobacteria;	Epsilonproteobacteria	circular	1652982	1493	T4SS	NOMOB	O	T4SS_NOT4CP_NOMOB_O_853	21	41	virb4@HEPY005c01_000210&0.806999&6.5e-96	traU	t4cp1	t4cp2	t4cp3	MOBC	MOBF	MOBH	MOBPHEN	MOBQ	MOBV	MOBT	MOBB	F_traE	F_traH	F_traK	F_traL	F_traN	F_traU	F_traV	F_traW	F_trbC	G_ICEHIN1056_000310	G_ICEHIN1056_000410	G_ICEHIN1056_000440	G_ICEHIN1056_000510	G_ICEHIN1056_000520	I_traI	I_traK	I_traL	I_traM	I_traN	I_traP	I_traQ	I_traR	I_traW	I_traY
NC_011333	Helicobacter_pylori_G27,_complete_genome._	Proteobacteria;	Epsilonproteobacteria	circular	1652982	1493	T4SS	NOMOB	O	T4SS_T4CP_NOMOB_O_854	482	501	virb4@HEPY005c01_005010&0.854719&1.1e-129	traU	t4cp1@HEPY005c01_004820&0.927273&1.8e-18	t4cp2@HEPY005c01_004820&0.986486&7.9e-37	t4cp3	MOBC	MOBF	MOBH	MOBPHEN	MOBQ	MOBV	MOBT	MOBB	F_traE	F_traH	F_traK	F_traL	F_traN	F_traU	F_traV	F_traW	F_trbC	G_ICEHIN1056_000310	G_ICEHIN1056_000410	G_ICEHIN1056_000440	G_ICEHIN1056_000510	G_ICEHIN1056_000520	I_traI	I_traK	I_traL	I_traM	I_traN	I_traP	I_traQ	I_traR	I_traW	I_traY
NC_011333	Helicobacter_pylori_G27,_complete_genome._	Proteobacteria;	Epsilonproteobacteria	circular	1652982	1493	NOT4SS	MOB	T	NOT4SS_T4CP_MOB_T_855	965	985	virb4	traU	t4cp1@HEPY005c01_009740&0.972727&1.4e-21	t4cp2@HEPY005c01_009740&0.981982&1.5e-37	t4cp3	MOBC	MOBF	MOBH	MOBPHEN@HEPY005c01_009760&0.781116&4.6e-12	MOBQ	MOBV	MOBT	MOBB	F_traE	F_traH	F_traK	F_traL	F_traN	F_traU	F_traV	F_traW	F_trbC	G_ICEHIN1056_000310	G_ICEHIN1056_000410	G_ICEHIN1056_000440	G_ICEHIN1056_000510	G_ICEHIN1056_000520	I_traI	I_traK	I_traL	I_traM	I_traN	I_traP	I_traQ	I_traR	I_traW	I_traY
NC_011498	Helicobacter_pylori_P12,_complete_genome._	Proteobacteria;	Epsilonproteobacteria	circular	1673813	1567	T4SS	NOMOB	O	T4SS_NOT4CP_NOMOB_O_856	20	41	virb4@HEPY006c01_000200&0.806999&1.1e-95	traU	t4cp1	t4cp2	t4cp3	MOBC	MOBF	MOBH	MOBPHEN	MOBQ	MOBV	MOBT	MOBB	F_traE	F_traH	F_traK	F_traL	F_traN	F_traU	F_traV	F_traW	F_trbC	G_ICEHIN1056_000310	G_ICEHIN1056_000410	G_ICEHIN1056_000440	G_ICEHIN1056_000510	G_ICEHIN1056_000520	I_traI	I_traK	I_traL	I_traM	I_traN	I_traP	I_traQ	I_traR	I_traW	I_traY
NC_011498	Helicobacter_pylori_P12,_complete_genome._	Proteobacteria;	Epsilonproteobacteria	circular	1673813	1567	NOT4SS	MOB	T	NOT4SS_T4CP_MOB_T_857	447	474	virb4	traU	t4cp1@HEPY006c01_004620&0.972727&5.8e-21	t4cp2@HEPY006c01_004620&0.981982&2.1e-36	t4cp3	MOBC	MOBF	MOBH	MOBPHEN@HEPY006c01_004590&0.828326&1.3e-12	MOBQ	MOBV	MOBT	MOBB	F_traE	F_traH	F_traK	F_traL@HEPY006c01_004740&0.58&3.4e-05	F_traN	F_traU	F_traV	F_traW	F_trbC	G_ICEHIN1056_000310	G_ICEHIN1056_000410	G_ICEHIN1056_000440	G_ICEHIN1056_000510	G_ICEHIN1056_000520	I_traI	I_traK	I_traL	I_traM	I_traN	I_traP	I_traQ	I_traR	I_traW	I_traY
NC_011498	Helicobacter_pylori_P12,_complete_genome._	Proteobacteria;	Epsilonproteobacteria	circular	1673813	1567	T4SS	NOMOB	O	T4SS_T4CP_NOMOB_O_858	537	557	virb4@HEPY006c01_005570&0.854719&7.1e-129	traU	t4cp1@HEPY006c01_005370&0.927273&1.8e-18	t4cp2@HEPY006c01_005370&0.986486&7.9e-37	t4cp3	MOBC	MOBF	MOBH	MOBPHEN	MOBQ	MOBV	MOBT	MOBB	F_traE	F_traH	F_traK	F_traL	F_traN	F_traU	F_traV	F_traW	F_trbC	G_ICEHIN1056_000310	G_ICEHIN1056_000410	G_ICEHIN1056_000440	G_ICEHIN1056_000510	G_ICEHIN1056_000520	I_traI	I_traK	I_traL	I_traM	I_traN	I_traP	I_traQ	I_traR	I_traW	I_traY
NC_011498	Helicobacter_pylori_P12,_complete_genome._	Proteobacteria;	Epsilonproteobacteria	circular	1673813	1567	T4SS	CONJ	O	T4SS_T4CP_MOB_O_859	1355	1380	virb4@HEPY006c01_013550&0.816543&3.6e-96	traU	t4cp1@HEPY006c01_013660&0.936364&4.7e-17	t4cp2@HEPY006c01_013660&0.977477&6.8e-40@HEPY006c01_013550&0.527027&1.4e-09	t4cp3	MOBC	MOBF	MOBH	MOBPHEN@HEPY006c01_013800&0.712446&1.4e-10	MOBQ	MOBV	MOBT	MOBB	F_traE	F_traH	F_traK	F_traL	F_traN	F_traU	F_traV	F_traW	F_trbC	G_ICEHIN1056_000310	G_ICEHIN1056_000410	G_ICEHIN1056_000440	G_ICEHIN1056_000510	G_ICEHIN1056_000520	I_traI	I_traK	I_traL	I_traM	I_traN	I_traP	I_traQ	I_traR	I_traW	I_traY
NC_012973	Helicobacter_pylori_B38,_complete_genome._	Proteobacteria;	Epsilonproteobacteria	circular	1576758	1382	T4SS	NOMOB	T	T4SS_NOT4CP_NOMOB_T_860	20	41	virb4@HEPY007c01_000200&0.805938&3.7e-94	traU	t4cp1	t4cp2	t4cp3	MOBC	MOBF	MOBH	MOBPHEN	MOBQ	MOBV	MOBT	MOBB	F_traE	F_traH	F_traK	F_traL	F_traN	F_traU	F_traV	F_traW	F_trbC	G_ICEHIN1056_000310	G_ICEHIN1056_000410	G_ICEHIN1056_000440	G_ICEHIN1056_000510	G_ICEHIN1056_000520	I_traI	I_traK	I_traL	I_traM	I_traN	I_traP	I_traQ	I_traR	I_traW	I_traY
NC_012982	Hirschia_baltica_ATCC_49814,_complete_genome._	Proteobacteria;	Alphaproteobacteria	circular	3455622	3119	T4SS	CONJ	T	T4SS_T4CP_MOB_T_862	668	687	virb4@HIBA001c01_006730&0.830329&3.2e-179	traU	t4cp1@HIBA001c01_006800&1&2.3e-24	t4cp2@HIBA001c01_006800&0.995495&1.3e-56	t4cp3	MOBC	MOBF	MOBH	MOBPHEN@HIBA001c01_006870&0.67382&4.3e-14	MOBQ	MOBV	MOBT	MOBB	F_traE	F_traH	F_traK	F_traL	F_traN	F_traU	F_traV	F_traW	F_trbC	G_ICEHIN1056_000310	G_ICEHIN1056_000410	G_ICEHIN1056_000440	G_ICEHIN1056_000510	G_ICEHIN1056_000520	I_traI	I_traK	I_traL	I_traM	I_traN	I_traP	I_traQ	I_traR	I_traW	I_traY
NC_006512	Idiomarina_loihiensis_L2TR,_complete_genome._	Proteobacteria;	Gammaproteobacteria	circular	2839318	2628	NOT4SS	MOB	O	NOT4SS_NOT4CP_MOB_O_867	690	690	virb4	traU	t4cp1	t4cp2	t4cp3	MOBC	MOBF	MOBH	MOBPHEN	MOBQ	MOBV@IDLO001c01_006900&0.941176&5.2e-09	MOBT	MOBB	F_traE	F_traH	F_traK	F_traL	F_traN	F_traU	F_traV	F_traW	F_trbC	G_ICEHIN1056_000310	G_ICEHIN1056_000410	G_ICEHIN1056_000440	G_ICEHIN1056_000510	G_ICEHIN1056_000520	I_traI	I_traK	I_traL	I_traM	I_traN	I_traP	I_traQ	I_traR	I_traW	I_traY
NC_007802	Jannaschia_sp._CCS1,_complete_genome._	Proteobacteria;	Alphaproteobacteria	circular	4317977	4212	NOT4SS	MOB	O	NOT4SS_NOT4CP_MOB_O_869	1553	1553	virb4	traU	t4cp1	t4cp2	t4cp3	MOBC	MOBF@JACC001c01_015530&0.609091&4.4e-66&3e-23	MOBH	MOBPHEN	MOBQ@JACC001c01_015530&0.995392&3.1e-78	MOBV	MOBT	MOBB	F_traE	F_traH	F_traK	F_traL	F_traN	F_traU	F_traV	F_traW	F_trbC	G_ICEHIN1056_000310	G_ICEHIN1056_000410	G_ICEHIN1056_000440	G_ICEHIN1056_000510	G_ICEHIN1056_000520	I_traI	I_traK	I_traL	I_traM	I_traN	I_traP	I_traQ	I_traR	I_traW	I_traY
NC_007802	Jannaschia_sp._CCS1,_complete_genome._	Proteobacteria;	Alphaproteobacteria	circular	4317977	4212	NOT4SS	MOB	O	NOT4SS_NOT4CP_MOB_O_871	3259	3259	virb4	traU	t4cp1	t4cp2	t4cp3	MOBC	MOBF	MOBH	MOBPHEN	MOBQ@JACC001c01_032590&0.995392&1.4e-78	MOBV	MOBT	MOBB	F_traE	F_traH	F_traK	F_traL	F_traN	F_traU	F_traV	F_traW	F_trbC	G_ICEHIN1056_000310	G_ICEHIN1056_000410	G_ICEHIN1056_000440	G_ICEHIN1056_000510	G_ICEHIN1056_000520	I_traI	I_traK	I_traL	I_traM	I_traN	I_traP	I_traQ	I_traR	I_traW	I_traY
NC_007802	Jannaschia_sp._CCS1,_complete_genome._	Proteobacteria;	Alphaproteobacteria	circular	4317977	4212	NOT4SS	MOB	O	NOT4SS_NOT4CP_MOB_O_872	3557	3557	virb4	traU	t4cp1	t4cp2	t4cp3	MOBC	MOBF	MOBH	MOBPHEN@JACC001c01_035570&0.690987&7.9e-23	MOBQ	MOBV	MOBT	MOBB	F_traE	F_traH	F_traK	F_traL	F_traN	F_traU	F_traV	F_traW	F_trbC	G_ICEHIN1056_000310	G_ICEHIN1056_000410	G_ICEHIN1056_000440	G_ICEHIN1056_000510	G_ICEHIN1056_000520	I_traI	I_traK	I_traL	I_traM	I_traN	I_traP	I_traQ	I_traR	I_traW	I_traY
NC_009659	Janthinobacterium_sp._Marseille,_complete_genome._	Proteobacteria;	Betaproteobacteria	circular	4110251	3697	NOT4SS	MOB	O	NOT4SS_NOT4CP_MOB_O_874	2572	2572	virb4	traU	t4cp1	t4cp2	t4cp3	MOBC	MOBF	MOBH	MOBPHEN@JASP001c01_025720&0.995708&6.9e-25	MOBQ	MOBV	MOBT	MOBB	F_traE	F_traH	F_traK	F_traL	F_traN	F_traU	F_traV	F_traW	F_trbC	G_ICEHIN1056_000310	G_ICEHIN1056_000410	G_ICEHIN1056_000440	G_ICEHIN1056_000510	G_ICEHIN1056_000520	I_traI	I_traK	I_traL	I_traM	I_traN	I_traP	I_traQ	I_traR	I_traW	I_traY
NC_011283	Klebsiella_pneumoniae_342,_complete_genome._	Proteobacteria;	Gammaproteobacteria	circular	5641239	5425	T4SS	CONJ	T	T4SS_T4CP_MOB_T_879	1768	1779	virb4@KLPN001c01_017790&0.876988&3.2e-206	traU	t4cp1@KLPN001c01_017690&0.909091&5.1e-08	t4cp2@KLPN001c01_017690&0.891892&1.7e-24	t4cp3	MOBC@KLPN001c01_017680&1&3.7e-67	MOBF	MOBH	MOBPHEN	MOBQ	MOBV	MOBT	MOBB	F_traE	F_traH	F_traK	F_traL	F_traN	F_traU	F_traV	F_traW	F_trbC	G_ICEHIN1056_000310	G_ICEHIN1056_000410	G_ICEHIN1056_000440	G_ICEHIN1056_000510	G_ICEHIN1056_000520	I_traI	I_traK	I_traL	I_traM	I_traN	I_traP	I_traQ	I_traR	I_traW	I_traY
NC_011283	Klebsiella_pneumoniae_342,_complete_genome._	Proteobacteria;	Gammaproteobacteria	circular	5641239	5425	NOT4SS	MOB	O	NOT4SS_NOT4CP_MOB_O_880	4411	4411	virb4	traU	t4cp1	t4cp2	t4cp3	MOBC	MOBF	MOBH	MOBPHEN@KLPN001c01_044110&0.896996&1.2e-23	MOBQ	MOBV	MOBT	MOBB	F_traE	F_traH	F_traK	F_traL	F_traN	F_traU	F_traV	F_traW	F_trbC	G_ICEHIN1056_000310	G_ICEHIN1056_000410	G_ICEHIN1056_000440	G_ICEHIN1056_000510	G_ICEHIN1056_000520	I_traI	I_traK	I_traL	I_traM	I_traN	I_traP	I_traQ	I_traR	I_traW	I_traY
NC_009648	Klebsiella_pneumoniae_subsp._pneumoniae_MGH_78578,_complete_genome._	Proteobacteria;	Gammaproteobacteria	circular	5315120	4776	NOT4SS	MOB	O	NOT4SS_T4CP_MOB_O_883	4698	4726	virb4	traU	t4cp1	t4cp2@KLPN002c01_046980&0.522523&2.4e-05	t4cp3	MOBC	MOBF	MOBH@KLPN002c01_047260&0.965686&4.8e-42	MOBPHEN	MOBQ	MOBV	MOBT	MOBB	F_traE	F_traH	F_traK	F_traL	F_traN	F_traU	F_traV	F_traW	F_trbC	G_ICEHIN1056_000310	G_ICEHIN1056_000410	G_ICEHIN1056_000440	G_ICEHIN1056_000510	G_ICEHIN1056_000520	I_traI	I_traK	I_traL	I_traM	I_traN	I_traP	I_traQ	I_traR	I_traW	I_traY
NC_012731	Klebsiella_pneumoniae_NTUH-K2044,_complete_genome._	Proteobacteria;	Gammaproteobacteria	circular	5248520	4992	T4SS	CONJ	G	T4SS_T4CP_MOB_G_884	528	595	virb4@KLPN003c01_005810&0.802757&1.3e-86	traU	t4cp1@KLPN003c01_005920&0.990909&1.5e-13	t4cp2@KLPN003c01_005920&0.923423&1.1e-28@KLPN003c01_005280&0.522523&2.3e-05	t4cp3	MOBC	MOBF	MOBH@KLPN003c01_005570&0.965686&5.9e-43	MOBPHEN	MOBQ	MOBV	MOBT	MOBB	F_traE	F_traH	F_traK	F_traL	F_traN	F_traU	F_traV	F_traW	F_trbC	G_ICEHIN1056_000310@KLPN003c01_005950&0.584158&3.1e-41	G_ICEHIN1056_000410@KLPN003c01_005850&0.936652&1.4e-91	G_ICEHIN1056_000440@KLPN003c01_005820&0.913043&6.4e-38	G_ICEHIN1056_000510@KLPN003c01_005650&0.960613&6e-173	G_ICEHIN1056_000520@KLPN003c01_005660&0.927492&2.2e-126	I_traI	I_traK	I_traL	I_traM	I_traN	I_traP	I_traQ	I_traR	I_traW	I_traY
NC_012731	Klebsiella_pneumoniae_NTUH-K2044,_complete_genome._	Proteobacteria;	Gammaproteobacteria	circular	5248520	4992	T4SS	CONJ	T	T4SS_T4CP_MOB_T_885	3369	3382	virb4@KLPN003c01_033690&0.879109&1.3e-225	traU	t4cp1@KLPN003c01_033810&0.909091&4.4e-06	t4cp2@KLPN003c01_033810&0.842342&9.9e-20	t4cp3	MOBC@KLPN003c01_033820&1&6.7e-66	MOBF	MOBH	MOBPHEN	MOBQ	MOBV	MOBT	MOBB	F_traE	F_traH	F_traK	F_traL	F_traN	F_traU	F_traV	F_traW	F_trbC	G_ICEHIN1056_000310	G_ICEHIN1056_000410	G_ICEHIN1056_000440	G_ICEHIN1056_000510	G_ICEHIN1056_000520	I_traI	I_traK	I_traL	I_traM	I_traN	I_traP	I_traQ	I_traR	I_traW	I_traY
NC_013729	Kribbella_flavida_DSM_17836,_complete_genome._	Actinobacteria;	Actinobacteria	circular	7579488	6943	NOT4SS	MOB	O	NOT4SS_T4CP_MOB_O_892	2149	2155	virb4	traU	t4cp1@KRFL001c01_021490&0.981818&3.3e-09	t4cp2@KRFL001c01_021490&0.972973&9.6e-29	t4cp3	MOBC	MOBF@KRFL001c01_021550&0.985227&2.9e-132	MOBH	MOBPHEN	MOBQ	MOBV	MOBT	MOBB	F_traE	F_traH	F_traK	F_traL	F_traN	F_traU	F_traV	F_traW	F_trbC	G_ICEHIN1056_000310	G_ICEHIN1056_000410	G_ICEHIN1056_000440	G_ICEHIN1056_000510	G_ICEHIN1056_000520	I_traI	I_traK	I_traL	I_traM	I_traN	I_traP	I_traQ	I_traR	I_traW	I_traY
NC_013729	Kribbella_flavida_DSM_17836,_complete_genome._	Actinobacteria;	FA	circular	7579488	6943	T4SS	NOMOB	O	T4SS_NOT4CP_NOMOB_O_893	2521	2521	virb4@KRFL001c01_025210&0.559915&5.7e-23&6.4e-06	traU	t4cp1	t4cp2	t4cp3	MOBC	MOBF	MOBH	MOBPHEN	MOBQ	MOBV	MOBT	MOBB	F_traE	F_traH	F_traK	F_traL	F_traN	F_traU	F_traV	F_traW	F_trbC	G_ICEHIN1056_000310	G_ICEHIN1056_000410	G_ICEHIN1056_000440	G_ICEHIN1056_000510	G_ICEHIN1056_000520	I_traI	I_traK	I_traL	I_traM	I_traN	I_traP	I_traQ	I_traR	I_traW	I_traY
NC_013169	Kytococcus_sedentarius_DSM_20547,_complete_genome._	Actinobacteria;	Actinobacteria	circular	2785024	2554	NOT4SS	MOB	O	NOT4SS_T4CP_MOB_O_895	615	650	virb4	traU	t4cp1@KYSE001c01_006500&0.981818&9.7e-11	t4cp2@KYSE001c01_006500&0.936937&2.7e-30	t4cp3	MOBC	MOBF@KYSE001c01_006150&0.990909&5.3e-181	MOBH	MOBPHEN	MOBQ	MOBV	MOBT	MOBB	F_traE	F_traH	F_traK	F_traL	F_traN	F_traU	F_traV	F_traW	F_trbC	G_ICEHIN1056_000310	G_ICEHIN1056_000410	G_ICEHIN1056_000440	G_ICEHIN1056_000510	G_ICEHIN1056_000520	I_traI	I_traK	I_traL	I_traM	I_traN	I_traP	I_traQ	I_traR	I_traW	I_traY
NC_013169	Kytococcus_sedentarius_DSM_20547,_complete_genome._	Actinobacteria;	Actinobacteria	circular	2785024	2554	NOT4SS	MOB	O	NOT4SS_NOT4CP_MOB_O_896	773	773	virb4	traU	t4cp1	t4cp2	t4cp3	MOBC	MOBF@KYSE001c01_007730&0.907955&4.7e-95&3.8e-18	MOBH	MOBPHEN	MOBQ	MOBV	MOBT	MOBB	F_traE	F_traH	F_traK	F_traL	F_traN	F_traU	F_traV	F_traW	F_trbC	G_ICEHIN1056_000310	G_ICEHIN1056_000410	G_ICEHIN1056_000440	G_ICEHIN1056_000510	G_ICEHIN1056_000520	I_traI	I_traK	I_traL	I_traM	I_traN	I_traP	I_traQ	I_traR	I_traW	I_traY
NC_008526	Lactobacillus_casei_ATCC_334,_complete_genome._	Firmicutes;	Firmicutes	circular	2895264	2751	T4SS	CONJ	O	T4SS_T4CP_MOB_O_898	521	533	virb4@LACA001c01_005250&0.57158&1.6e-57	traU	t4cp1@LACA001c01_005210&0.990909&1.8e-12	t4cp2@LACA001c01_005210&0.986486&6.3e-49	t4cp3	MOBC	MOBF	MOBH	MOBPHEN@LACA001c01_005330&0.634578&2.3e-51	MOBQ	MOBV	MOBT	MOBB	F_traE	F_traH	F_traK	F_traL	F_traN	F_traU	F_traV	F_traW	F_trbC	G_ICEHIN1056_000310	G_ICEHIN1056_000410	G_ICEHIN1056_000440	G_ICEHIN1056_000510	G_ICEHIN1056_000520	I_traI	I_traK	I_traL	I_traM	I_traN	I_traP	I_traQ	I_traR	I_traW	I_traY
NC_008526	Lactobacillus_casei_ATCC_334,_complete_genome._	Firmicutes;	Firmicutes	circular	2895264	2751	NOT4SS	MOB	O	NOT4SS_NOT4CP_MOB_O_901	2027	2027	virb4	traU	t4cp1	t4cp2	t4cp3	MOBC	MOBF@LACA001c01_020270&0.529545&1.1e-46	MOBH	MOBPHEN	MOBQ	MOBV	MOBT	MOBB	F_traE	F_traH	F_traK	F_traL	F_traN	F_traU	F_traV	F_traW	F_trbC	G_ICEHIN1056_000310	G_ICEHIN1056_000410	G_ICEHIN1056_000440	G_ICEHIN1056_000510	G_ICEHIN1056_000520	I_traI	I_traK	I_traL	I_traM	I_traN	I_traP	I_traQ	I_traR	I_traW	I_traY
NC_010999	Lactobacillus_casei,_complete_genome._	Firmicutes;	Firmicutes	circular	3079196	3044	T4SS	CONJ	O	T4SS_T4CP_MOB_O_902	584	596	virb4@LACA002c01_005880&0.57158&2.8e-57	traU	t4cp1@LACA002c01_005840&0.990909&1.8e-12	t4cp2@LACA002c01_005840&0.986486&1.5e-48	t4cp3	MOBC	MOBF	MOBH	MOBPHEN@LACA002c01_005960&0.64833&1.2e-51	MOBQ	MOBV	MOBT	MOBB	F_traE	F_traH	F_traK	F_traL	F_traN	F_traU	F_traV	F_traW	F_trbC	G_ICEHIN1056_000310	G_ICEHIN1056_000410	G_ICEHIN1056_000440	G_ICEHIN1056_000510	G_ICEHIN1056_000520	I_traI	I_traK	I_traL	I_traM	I_traN	I_traP	I_traQ	I_traR	I_traW	I_traY
NC_010999	Lactobacillus_casei,_complete_genome._	Firmicutes;	Firmicutes	circular	3079196	3044	NOT4SS	MOB	O	NOT4SS_NOT4CP_MOB_O_905	2197	2197	virb4	traU	t4cp1	t4cp2	t4cp3	MOBC	MOBF@LACA002c01_021970&0.529545&8.9e-47	MOBH	MOBPHEN	MOBQ	MOBV	MOBT	MOBB	F_traE	F_traH	F_traK	F_traL	F_traN	F_traU	F_traV	F_traW	F_trbC	G_ICEHIN1056_000310	G_ICEHIN1056_000410	G_ICEHIN1056_000440	G_ICEHIN1056_000510	G_ICEHIN1056_000520	I_traI	I_traK	I_traL	I_traM	I_traN	I_traP	I_traQ	I_traR	I_traW	I_traY
NC_012559	Laribacter_hongkongensis_HLHK9,_complete_genome._	Proteobacteria;	Betaproteobacteria	circular	3169329	3235	NOT4SS	MOB	O	NOT4SS_NOT4CP_MOB_O_909	946	946	virb4	traU	t4cp1	t4cp2	t4cp3	MOBC	MOBF	MOBH	MOBPHEN@LAHO001c01_009460&0.845494&2e-30	MOBQ	MOBV	MOBT	MOBB	F_traE	F_traH	F_traK	F_traL	F_traN	F_traU	F_traV	F_traW	F_trbC	G_ICEHIN1056_000310	G_ICEHIN1056_000410	G_ICEHIN1056_000440	G_ICEHIN1056_000510	G_ICEHIN1056_000520	I_traI	I_traK	I_traL	I_traM	I_traN	I_traP	I_traQ	I_traR	I_traW	I_traY
NC_008527	Lactococcus_lactis_subsp._cremoris_SK11,_complete_genome._	Firmicutes;	Firmicutes	circular	2438589	2384	NOT4SS	MOB	O	NOT4SS_NOT4CP_MOB_O_913	1794	1794	virb4	traU	t4cp1	t4cp2	t4cp3	MOBC	MOBF@LALA002c01_017940&0.519318&9.3e-29&5.6e-10	MOBH	MOBPHEN	MOBQ	MOBV	MOBT	MOBB	F_traE	F_traH	F_traK	F_traL	F_traN	F_traU	F_traV	F_traW	F_trbC	G_ICEHIN1056_000310	G_ICEHIN1056_000410	G_ICEHIN1056_000440	G_ICEHIN1056_000510	G_ICEHIN1056_000520	I_traI	I_traK	I_traL	I_traM	I_traN	I_traP	I_traQ	I_traR	I_traW	I_traY
NC_009004	Lactococcus_lactis_subsp._cremoris_MG1363,_complete_genome._	Firmicutes;	Firmicutes	circular	2529478	2434	T4SS	NOMOB	O	T4SS_T4CP_NOMOB_O_914	1359	1369	virb4@LALA003c01_013670&0.747614&3.9e-74	traU	t4cp1@LALA003c01_013590&0.981818&3.8e-13	t4cp2@LALA003c01_013590&0.972973&1.7e-47	t4cp3	MOBC	MOBF	MOBH	MOBPHEN	MOBQ	MOBV	MOBT	MOBB	F_traE	F_traH	F_traK	F_traL	F_traN	F_traU	F_traV	F_traW	F_trbC	G_ICEHIN1056_000310	G_ICEHIN1056_000410	G_ICEHIN1056_000440	G_ICEHIN1056_000510	G_ICEHIN1056_000520	I_traI	I_traK	I_traL	I_traM	I_traN	I_traP	I_traQ	I_traR	I_traW	I_traY
NC_013656	Lactococcus_lactis_subsp._lactis_KF147,_complete_genome._	Firmicutes;	FA	circular	2598144	2444	T4SS	CONJ	O	T4SS_T4CP_MOB_O_916	311	325	virb4@LALA004c01_003250&0.685048&5e-19	traU	t4cp1	t4cp2	t4cp3@LALA004c01_003110&0.840517&2.1e-75	MOBC	MOBF	MOBH	MOBPHEN	MOBQ	MOBV	MOBT@LALA004c01_003160&0.978142&8.2e-79	MOBB	F_traE	F_traH	F_traK	F_traL	F_traN	F_traU	F_traV	F_traW	F_trbC	G_ICEHIN1056_000310	G_ICEHIN1056_000410	G_ICEHIN1056_000440	G_ICEHIN1056_000510	G_ICEHIN1056_000520	I_traI	I_traK	I_traL	I_traM	I_traN	I_traP	I_traQ	I_traR	I_traW	I_traY
NC_013656	Lactococcus_lactis_subsp._lactis_KF147,_complete_genome._	Firmicutes;	FA	circular	2598144	2444	T4SS	CONJ	O	T4SS_T4CP_MOB_O_917	2213	2222	virb4@LALA004c01_022130&0.696713&6e-20	traU	t4cp1	t4cp2	t4cp3@LALA004c01_022220&0.965517&6.1e-56	MOBC	MOBF	MOBH	MOBPHEN	MOBQ	MOBV	MOBT@LALA004c01_022210&0.991803&7.6e-84	MOBB	F_traE	F_traH	F_traK	F_traL	F_traN	F_traU	F_traV	F_traW	F_trbC	G_ICEHIN1056_000310	G_ICEHIN1056_000410	G_ICEHIN1056_000440	G_ICEHIN1056_000510	G_ICEHIN1056_000520	I_traI	I_traK	I_traL	I_traM	I_traN	I_traP	I_traQ	I_traR	I_traW	I_traY
NC_013198	Lactobacillus_rhamnosus_GG,_complete_genome._	Firmicutes;	Firmicutes	circular	3010111	2944	NOT4SS	MOB	O	NOT4SS_NOT4CP_MOB_O_921	2082	2082	virb4	traU	t4cp1	t4cp2	t4cp3	MOBC	MOBF@LARH001c01_020820&0.526136&5.4e-47	MOBH	MOBPHEN	MOBQ	MOBV	MOBT	MOBB	F_traE	F_traH	F_traK	F_traL	F_traN	F_traU	F_traV	F_traW	F_trbC	G_ICEHIN1056_000310	G_ICEHIN1056_000410	G_ICEHIN1056_000440	G_ICEHIN1056_000510	G_ICEHIN1056_000520	I_traI	I_traK	I_traL	I_traM	I_traN	I_traP	I_traQ	I_traR	I_traW	I_traY
NC_013192	Leptotrichia_buccalis_DSM_1135,_complete_genome._	Fusobacteria;	Fusobacteria	circular	2465610	2220	NOT4SS	MOB	O	NOT4SS_NOT4CP_MOB_O_926	106	106	virb4	traU	t4cp1	t4cp2	t4cp3	MOBC	MOBF	MOBH	MOBPHEN	MOBQ	MOBV	MOBT	MOBB@LEBU001c01_001060&0.924107&1.1e-18	F_traE	F_traH	F_traK	F_traL	F_traN	F_traU	F_traV	F_traW	F_trbC	G_ICEHIN1056_000310	G_ICEHIN1056_000410	G_ICEHIN1056_000440	G_ICEHIN1056_000510	G_ICEHIN1056_000520	I_traI	I_traK	I_traL	I_traM	I_traN	I_traP	I_traQ	I_traR	I_traW	I_traY
NC_013192	Leptotrichia_buccalis_DSM_1135,_complete_genome._	Fusobacteria;	Fusobacteria	circular	2465610	2220	T4SS	CONJ	T	T4SS_T4CP_MOB_T_928	944	966	virb4@LEBU001c01_009540&0.821845&8e-138	traU	t4cp1@LEBU001c01_009590&1&3e-18	t4cp2@LEBU001c01_009590&1&2.7e-43	t4cp3	MOBC	MOBF	MOBH	MOBPHEN@LEBU001c01_009660&0.562232&3.5e-07	MOBQ@LEBU001c01_009660&0.953917&5.2e-43	MOBV@LEBU001c01_009660&0.70098&3e-07	MOBT	MOBB	F_traE	F_traH	F_traK	F_traL	F_traN	F_traU	F_traV	F_traW	F_trbC	G_ICEHIN1056_000310	G_ICEHIN1056_000410	G_ICEHIN1056_000440	G_ICEHIN1056_000510	G_ICEHIN1056_000520	I_traI	I_traK	I_traL	I_traM	I_traN	I_traP	I_traQ	I_traR	I_traW	I_traY
NC_010524	Leptothrix_cholodnii_SP-6,_complete_genome._	Proteobacteria;	Betaproteobacteria	circular	4909403	4363	T4SS	CONJ	T	T4SS_T4CP_MOB_T_932_O_931	791	876	virb4@LECH001c01_008750&0.831389&4.6e-203	traU	t4cp1@LECH001c01_008670&0.981818&5.9e-31	t4cp2@LECH001c01_008670&0.995495&1.9e-54	t4cp3	MOBC	MOBF	MOBH	MOBPHEN@LECH001c01_007910&0.763948&2.8e-25	MOBQ	MOBV	MOBT	MOBB	F_traE	F_traH	F_traK	F_traL	F_traN	F_traU	F_traV	F_traW	F_trbC	G_ICEHIN1056_000310	G_ICEHIN1056_000410	G_ICEHIN1056_000440	G_ICEHIN1056_000510	G_ICEHIN1056_000520	I_traI	I_traK	I_traL	I_traM	I_traN	I_traP	I_traQ	I_traR	I_traW	I_traY
NC_010471	Leuconostoc_citreum_KM20,_complete_genome._	Firmicutes;	FA	circular	1796284	1702	T4SS	CONJ	O	T4SS_T4CP_MOB_O_933A	879	886	virb4@LECI001c01_008790&0.740191&9.6e-27	traU	t4cp1	t4cp2	t4cp3@LECI001c01_008830&0.948276&2.4e-53	MOBC	MOBF	MOBH	MOBPHEN	MOBQ	MOBV	MOBT@LECI001c01_008860&0.991803&4.9e-94	MOBB	F_traE	F_traH	F_traK	F_traL	F_traN	F_traU	F_traV	F_traW	F_trbC	G_ICEHIN1056_000310	G_ICEHIN1056_000410	G_ICEHIN1056_000440	G_ICEHIN1056_000510	G_ICEHIN1056_000520	I_traI	I_traK	I_traL	I_traM	I_traN	I_traP	I_traQ	I_traR	I_traW	I_traY
NC_010471	Leuconostoc_citreum_KM20,_complete_genome._	Firmicutes;	FA	circular	1796284	1702	T4SS	CONJ	O	T4SS_T4CP_MOB_O_933B	898	907	virb4@LECI001c01_009070&0.741251&5.8e-21	traU	t4cp1	t4cp2	t4cp3@LECI001c01_009020&0.948276&3.7e-57	MOBC	MOBF	MOBH	MOBPHEN	MOBQ	MOBV	MOBT@LECI001c01_008980&0.991803&1.3e-89	MOBB	F_traE	F_traH	F_traK	F_traL	F_traN	F_traU	F_traV	F_traW	F_trbC	G_ICEHIN1056_000310	G_ICEHIN1056_000410	G_ICEHIN1056_000440	G_ICEHIN1056_000510	G_ICEHIN1056_000520	I_traI	I_traK	I_traL	I_traM	I_traN	I_traP	I_traQ	I_traR	I_traW	I_traY
NC_014136	Leuconostoc_kimchii_IMSNU11154_chromosome,_complete_genome._	Firmicutes;	Firmicutes	circular	2002721	2026	NOT4SS	MOB	O	NOT4SS_T4CP_MOB_O_936	22	73	virb4	traU	t4cp1@LEKI001c01_000220&0.872727&1.6e-10	t4cp2@LEKI001c01_000220&0.936937&1.6e-35	t4cp3	MOBC	MOBF	MOBH	MOBPHEN@LEKI001c01_000730&0.62279&7.8e-23	MOBQ	MOBV	MOBT	MOBB	F_traE	F_traH	F_traK	F_traL	F_traN	F_traU	F_traV	F_traW	F_trbC	G_ICEHIN1056_000310	G_ICEHIN1056_000410	G_ICEHIN1056_000440	G_ICEHIN1056_000510	G_ICEHIN1056_000520	I_traI	I_traK	I_traL	I_traM	I_traN	I_traP	I_traQ	I_traR	I_traW	I_traY
NC_013861	Legionella_longbeachae_NSW150,_complete_genome._	Proteobacteria;	Gammaproteobacteria	circular	4077332	3403	NOT4SS	MOB	O	NOT4SS_NOT4CP_MOB_O_938	117	117	virb4	traU	t4cp1	t4cp2	t4cp3	MOBC	MOBF	MOBH@LELO001c01_001170&0.882353&3.5e-18	MOBPHEN	MOBQ	MOBV	MOBT	MOBB	F_traE	F_traH	F_traK	F_traL	F_traN	F_traU	F_traV	F_traW	F_trbC	G_ICEHIN1056_000310	G_ICEHIN1056_000410	G_ICEHIN1056_000440	G_ICEHIN1056_000510	G_ICEHIN1056_000520	I_traI	I_traK	I_traL	I_traM	I_traN	I_traP	I_traQ	I_traR	I_traW	I_traY
NC_013861	Legionella_longbeachae_NSW150,_complete_genome._	Proteobacteria;	Gammaproteobacteria	circular	4077332	3403	T4SS	CONJ	F	T4SS_T4CP_MOB_F_942	1848	1865	virb4@LELO001c01_018600&0.844115&3.2e-136	traU	t4cp1@LELO001c01_018490&0.990909&2.4e-14	t4cp2@LELO001c01_018490&0.995495&2.3e-43	t4cp3	MOBC	MOBF@LELO001c01_018480&0.998864&9.9e-198	MOBH	MOBPHEN	MOBQ	MOBV	MOBT	MOBB	F_traE@LELO001c01_018640&0.963731&4.8e-51	F_traH@LELO001c01_018520&0.947939&1.8e-131	F_traK@LELO001c01_018630&0.794964&2.1e-43	F_traL@LELO001c01_018650&0.99&7.9e-28	F_traN@LELO001c01_018550&0.922137&1.3e-12&3.9e-84	F_traU@LELO001c01_018570&0.949102&5.2e-128	F_traV	F_traW@LELO001c01_018580&0.933962&3.8e-54	F_trbC@LELO001c01_018560&0.550218&2.2e-38	G_ICEHIN1056_000310	G_ICEHIN1056_000410	G_ICEHIN1056_000440	G_ICEHIN1056_000510	G_ICEHIN1056_000520	I_traI	I_traK	I_traL	I_traM	I_traN	I_traP	I_traQ	I_traR	I_traW	I_traY
NC_013861	Legionella_longbeachae_NSW150,_complete_genome._	Proteobacteria;	Gammaproteobacteria	circular	4077332	3403	T4SS	NOMOB	I	T4SS_T4CP_NOMOB_I_944_O_939	362	2813	virb4@LELO001c01_027980&0.794274&9.6e-22	traU@LELO001c01_027980&0.986111&0	t4cp1@LELO001c01_028080&1&6.3e-15	t4cp2@LELO001c01_028080&0.990991&5.9e-37	t4cp3	MOBC	MOBF	MOBH	MOBPHEN	MOBQ	MOBV	MOBT	MOBB	F_traE	F_traH	F_traK	F_traL	F_traN	F_traU	F_traV	F_traW	F_trbC	G_ICEHIN1056_000310	G_ICEHIN1056_000410	G_ICEHIN1056_000440	G_ICEHIN1056_000510	G_ICEHIN1056_000520	I_traI@LELO001c01_003660&0.85348&2.7e-73	I_traK@LELO001c01_028130&0.896552&7.5e-20	I_traL	I_traM@LELO001c01_028050&0.868996&4.1e-57	I_traN@LELO001c01_028040&0.916667&2.3e-73	I_traP@LELO001c01_028020&0.949791&8.9e-17	I_traQ@LELO001c01_028010&0.949721&2.6e-05	I_traR@LELO001c01_028000&0.708955&3.5e-07	I_traW	I_traY@LELO001c01_003620&0.738255&4.5e-40&5.7e-05&2.3e-30
NC_013861	Legionella_longbeachae_NSW150,_complete_genome._	Proteobacteria;	Gammaproteobacteria	circular	4077332	3403	T4SS	CONJ	T	T4SS_T4CP_MOB_T_945	2901	2914	virb4@LELO001c01_029020&0.823966&2.4e-188	traU	t4cp1@LELO001c01_029100&1&2.7e-27	t4cp2@LELO001c01_029100&0.995495&9.4e-63	t4cp3	MOBC	MOBF	MOBH	MOBPHEN@LELO001c01_029140&0.939914&4.3e-46	MOBQ	MOBV	MOBT	MOBB	F_traE	F_traH	F_traK	F_traL	F_traN	F_traU	F_traV	F_traW	F_trbC	G_ICEHIN1056_000310	G_ICEHIN1056_000410	G_ICEHIN1056_000440	G_ICEHIN1056_000510	G_ICEHIN1056_000520	I_traI	I_traK	I_traL	I_traM	I_traN	I_traP	I_traQ	I_traR	I_traW	I_traY
NC_008531	Leuconostoc_mesenteroides_subsp._mesenteroides_ATCC_8293,_complete_genome._	Firmicutes;	Firmicutes	circular	2038396	1970	NOT4SS	MOB	O	NOT4SS_NOT4CP_MOB_O_948	49	49	virb4	traU	t4cp1	t4cp2	t4cp3	MOBC@LEME001c01_000490&0.511848&0.00073	MOBF	MOBH	MOBPHEN	MOBQ	MOBV	MOBT	MOBB	F_traE	F_traH	F_traK	F_traL	F_traN	F_traU	F_traV	F_traW	F_trbC	G_ICEHIN1056_000310	G_ICEHIN1056_000410	G_ICEHIN1056_000440	G_ICEHIN1056_000510	G_ICEHIN1056_000520	I_traI	I_traK	I_traL	I_traM	I_traN	I_traP	I_traQ	I_traR	I_traW	I_traY
NC_008531	Leuconostoc_mesenteroides_subsp._mesenteroides_ATCC_8293,_complete_genome._	Firmicutes;	FA	circular	2038396	1970	T4SS	CONJ	O	T4SS_T4CP_MOB_O_950	1022	1029	virb4@LEME001c01_010220&0.741251&5.7e-22	traU	t4cp1	t4cp2	t4cp3@LEME001c01_010250&0.946121&1.8e-53	MOBC	MOBF	MOBH	MOBPHEN	MOBQ	MOBV	MOBT@LEME001c01_010290&0.994536&1.4e-96	MOBB	F_traE	F_traH	F_traK	F_traL	F_traN	F_traU	F_traV	F_traW	F_trbC	G_ICEHIN1056_000310	G_ICEHIN1056_000410	G_ICEHIN1056_000440	G_ICEHIN1056_000510	G_ICEHIN1056_000520	I_traI	I_traK	I_traL	I_traM	I_traN	I_traP	I_traQ	I_traR	I_traW	I_traY
NC_008531	Leuconostoc_mesenteroides_subsp._mesenteroides_ATCC_8293,_complete_genome._	Firmicutes;	Firmicutes	circular	2038396	1970	NOT4SS	MOB	O	NOT4SS_T4CP_MOB_O_951	1047	1097	virb4	traU	t4cp1@LEME001c01_010970&0.863636&1.7e-10	t4cp2@LEME001c01_010970&0.936937&6.2e-36	t4cp3	MOBC	MOBF	MOBH	MOBPHEN@LEME001c01_010470&0.624754&1.9e-22@LEME001c01_010550&0.561886&2.3e-21	MOBQ	MOBV	MOBT	MOBB	F_traE	F_traH	F_traK	F_traL	F_traN	F_traU	F_traV	F_traW	F_trbC	G_ICEHIN1056_000310	G_ICEHIN1056_000410	G_ICEHIN1056_000440	G_ICEHIN1056_000510	G_ICEHIN1056_000520	I_traI	I_traK	I_traL	I_traM	I_traN	I_traP	I_traQ	I_traR	I_traW	I_traY
NC_002942	Legionella_pneumophila_subsp._pneumophila_str._Philadelphia_1,_complete_genome._	Proteobacteria;	Gammaproteobacteria	circular	3397754	2942	T4SS	NOMOB	I	T4SS_T4CP_NOMOB_I_953	440	471	virb4@LEPN001c01_004550&0.81018&3.3e-18	traU@LEPN001c01_004550&0.988095&0	t4cp1@LEPN001c01_004450&1&8.9e-15	t4cp2@LEPN001c01_004450&0.990991&1.7e-36	t4cp3	MOBC	MOBF	MOBH	MOBPHEN	MOBQ	MOBV	MOBT	MOBB	F_traE	F_traH	F_traK	F_traL	F_traN	F_traU	F_traV	F_traW	F_trbC	G_ICEHIN1056_000310	G_ICEHIN1056_000410	G_ICEHIN1056_000440	G_ICEHIN1056_000510	G_ICEHIN1056_000520	I_traI	I_traK@LEPN001c01_004400&0.896552&8.2e-23	I_traL	I_traM@LEPN001c01_004480&0.855895&5.8e-57	I_traN@LEPN001c01_004490&0.943452&2e-74	I_traP@LEPN001c01_004510&0.970711&2.6e-17	I_traQ@LEPN001c01_004710&0.96648&1.2e-06	I_traR	I_traW	I_traY
NC_002942	Legionella_pneumophila_subsp._pneumophila_str._Philadelphia_1,_complete_genome._	Proteobacteria;	Gammaproteobacteria	circular	3397754	2942	T4SS	NOMOB	G	T4SS_T4CP_NOMOB_G_955	981	1000	virb4@LEPN001c01_009870&0.812301&4.5e-63	traU	t4cp1@LEPN001c01_009810&0.945455&9.7e-13	t4cp2@LEPN001c01_009810&0.923423&1.5e-28	t4cp3	MOBC	MOBF	MOBH	MOBPHEN	MOBQ	MOBV	MOBT	MOBB	F_traE	F_traH	F_traK	F_traL	F_traN	F_traU	F_traV	F_traW	F_trbC	G_ICEHIN1056_000310@LEPN001c01_010000&0.544554&1.8e-42	G_ICEHIN1056_000410@LEPN001c01_009910&0.963801&1.8e-68	G_ICEHIN1056_000440@LEPN001c01_009880&0.905797&2.7e-27	G_ICEHIN1056_000510@LEPN001c01_009850&0.984683&3e-143	G_ICEHIN1056_000520@LEPN001c01_009860&0.94864&1e-93	I_traI	I_traK	I_traL	I_traM	I_traN	I_traP	I_traQ	I_traR	I_traW	I_traY
NC_002942	Legionella_pneumophila_subsp._pneumophila_str._Philadelphia_1,_complete_genome._	Proteobacteria;	Gammaproteobacteria	circular	3397754	2942	T4SS	CONJ	T	T4SS_T4CP_MOB_T_956	1238	1252	virb4@LEPN001c01_012510&0.81018&6.3e-156	traU	t4cp1@LEPN001c01_012420&0.990909&3.3e-23	t4cp2@LEPN001c01_012420&1&6.7e-53	t4cp3	MOBC	MOBF@LEPN001c01_012380&0.5875&5.9e-65&2e-23	MOBH	MOBPHEN@LEPN001c01_012380&0.575107&3.8e-06	MOBQ@LEPN001c01_012380&0.963134&1.3e-57	MOBV	MOBT	MOBB	F_traE	F_traH	F_traK	F_traL	F_traN	F_traU	F_traV	F_traW	F_trbC	G_ICEHIN1056_000310	G_ICEHIN1056_000410	G_ICEHIN1056_000440	G_ICEHIN1056_000510	G_ICEHIN1056_000520	I_traI	I_traK	I_traL	I_traM	I_traN	I_traP	I_traQ	I_traR	I_traW	I_traY
NC_002942	Legionella_pneumophila_subsp._pneumophila_str._Philadelphia_1,_complete_genome._	Proteobacteria;	Gammaproteobacteria	circular	3397754	2942	T4SS	CONJ	F	T4SS_T4CP_MOB_F_957	2073	2088	virb4@LEPN001c01_020830&0.840933&9.2e-112	traU	t4cp1@LEPN001c01_020740&0.972727&3.6e-14	t4cp2@LEPN001c01_020740&0.887387&1.6e-38	t4cp3	MOBC	MOBF@LEPN001c01_020730&0.998864&6.9e-194	MOBH	MOBPHEN	MOBQ	MOBV	MOBT	MOBB	F_traE@LEPN001c01_020870&0.880829&4.7e-37	F_traH@LEPN001c01_020760&0.952278&6.9e-117	F_traK@LEPN001c01_020860&0.802158&6.2e-26	F_traL@LEPN001c01_020880&0.99&3.5e-19	F_traN@LEPN001c01_020790&0.766412&1.1e-07&2e-88	F_traU@LEPN001c01_020810&0.943114&2.6e-131	F_traV	F_traW@LEPN001c01_020820&0.924528&3e-71	F_trbC@LEPN001c01_020800&0.816594&1.1e-41	G_ICEHIN1056_000310	G_ICEHIN1056_000410	G_ICEHIN1056_000440	G_ICEHIN1056_000510	G_ICEHIN1056_000520	I_traI	I_traK	I_traL	I_traM	I_traN	I_traP	I_traQ	I_traR	I_traW	I_traY
NC_002942	Legionella_pneumophila_subsp._pneumophila_str._Philadelphia_1,_complete_genome._	Proteobacteria;	Gammaproteobacteria	circular	3397754	2942	NOT4SS	MOB	O	NOT4SS_NOT4CP_MOB_O_960	2916	2916	virb4	traU	t4cp1	t4cp2	t4cp3	MOBC	MOBF	MOBH@LEPN001c01_029160&0.926471&1.3e-21	MOBPHEN	MOBQ	MOBV	MOBT	MOBB	F_traE	F_traH	F_traK	F_traL	F_traN	F_traU	F_traV	F_traW	F_trbC	G_ICEHIN1056_000310	G_ICEHIN1056_000410	G_ICEHIN1056_000440	G_ICEHIN1056_000510	G_ICEHIN1056_000520	I_traI	I_traK	I_traL	I_traM	I_traN	I_traP	I_traQ	I_traR	I_traW	I_traY
NC_006369	Legionella_pneumophila_str._Lens,_complete_genome._	Proteobacteria;	Gammaproteobacteria	circular	3345687	2878	T4SS	CONJ	T	T4SS_T4CP_MOB_T_961	118	167	virb4@LEPN002c01_001510&0.81018&5.7e-155	traU	t4cp1@LEPN002c01_001600&0.990909&2e-23	t4cp2@LEPN002c01_001600&1&1.2e-52	t4cp3	MOBC	MOBF@LEPN002c01_001670&0.570455&1e-60&4.2e-23	MOBH	MOBPHEN	MOBQ@LEPN002c01_001670&0.926267&3.7e-59	MOBV	MOBT	MOBB	F_traE	F_traH	F_traK	F_traL	F_traN	F_traU	F_traV	F_traW	F_trbC	G_ICEHIN1056_000310	G_ICEHIN1056_000410	G_ICEHIN1056_000440	G_ICEHIN1056_000510	G_ICEHIN1056_000520	I_traI	I_traK	I_traL	I_traM@LEPN002c01_001180&0.572052&2.8e-19	I_traN	I_traP	I_traQ	I_traR	I_traW	I_traY
NC_006369	Legionella_pneumophila_str._Lens,_complete_genome._	Proteobacteria;	Gammaproteobacteria	circular	3345687	2878	T4SS	NOMOB	I	T4SS_T4CP_NOMOB_I_962_O_966	480	2606	virb4@LEPN002c01_004950&0.811241&3.1e-18	traU@LEPN002c01_004950&0.988095&0	t4cp1@LEPN002c01_004850&1&8.9e-15	t4cp2@LEPN002c01_004850&0.990991&1.7e-36	t4cp3	MOBC	MOBF	MOBH	MOBPHEN	MOBQ	MOBV	MOBT	MOBB	F_traE	F_traH	F_traK	F_traL	F_traN	F_traU	F_traV	F_traW	F_trbC	G_ICEHIN1056_000310	G_ICEHIN1056_000410	G_ICEHIN1056_000440	G_ICEHIN1056_000510	G_ICEHIN1056_000520	I_traI@LEPN002c01_025950&0.970696&1.2e-73	I_traK@LEPN002c01_004800&0.896552&8.2e-23	I_traL	I_traM@LEPN002c01_004880&0.855895&5.8e-57	I_traN@LEPN002c01_004890&0.958333&3e-74	I_traP@LEPN002c01_004910&0.970711&4.3e-18	I_traQ@LEPN002c01_005100&0.96648&8e-07@LEPN002c01_004920&0.681564&6e-05&0.0086	I_traR@LEPN002c01_004930&0.731343&2.9e-07	I_traW	I_traY@LEPN002c01_026060&0.813423&9.9e-42&1.3e-20&2.9e-10
NC_006369	Legionella_pneumophila_str._Lens,_complete_genome._	Proteobacteria;	Gammaproteobacteria	circular	3345687	2878	T4SS	NOMOB	G	T4SS_T4CP_NOMOB_G_964	1015	1034	virb4@LEPN002c01_010210&0.815483&2.1e-61	traU	t4cp1@LEPN002c01_010150&0.945455&3.2e-13	t4cp2@LEPN002c01_010150&0.923423&6.3e-29	t4cp3	MOBC	MOBF	MOBH	MOBPHEN	MOBQ	MOBV	MOBT	MOBB	F_traE	F_traH	F_traK	F_traL	F_traN	F_traU	F_traV	F_traW	F_trbC	G_ICEHIN1056_000310@LEPN002c01_010340&0.544554&3.7e-42	G_ICEHIN1056_000410@LEPN002c01_010250&0.963801&1.1e-70	G_ICEHIN1056_000440@LEPN002c01_010220&0.963768&5.1e-29	G_ICEHIN1056_000510@LEPN002c01_010190&0.984683&1.1e-143	G_ICEHIN1056_000520@LEPN002c01_010200&0.954683&7.2e-94	I_traI	I_traK	I_traL	I_traM	I_traN	I_traP	I_traQ	I_traR	I_traW	I_traY
NC_006369	Legionella_pneumophila_str._Lens,_complete_genome._	Proteobacteria;	Gammaproteobacteria	circular	3345687	2878	NOT4SS	MOB	O	NOT4SS_NOT4CP_MOB_O_967	2851	2851	virb4	traU	t4cp1	t4cp2	t4cp3	MOBC	MOBF	MOBH@LEPN002c01_028510&0.926471&4.6e-21	MOBPHEN	MOBQ	MOBV	MOBT	MOBB	F_traE	F_traH	F_traK	F_traL	F_traN	F_traU	F_traV	F_traW	F_trbC	G_ICEHIN1056_000310	G_ICEHIN1056_000410	G_ICEHIN1056_000440	G_ICEHIN1056_000510	G_ICEHIN1056_000520	I_traI	I_traK	I_traL	I_traM	I_traN	I_traP	I_traQ	I_traR	I_traW	I_traY
NC_006368	Legionella_pneumophila_str._Paris,_complete_genome._	Proteobacteria;	Gammaproteobacteria	circular	3503610	3027	T4SS	CONJ	T	T4SS_T4CP_MOB_T_968	133	178	virb4@LEPN003c01_001660&0.81018&4.7e-155	traU	t4cp1@LEPN003c01_001750&0.990909&2.9e-23	t4cp2@LEPN003c01_001750&1&6.7e-53	t4cp3	MOBC	MOBF@LEPN003c01_001780&0.571591&5.3e-59&1.5e-22	MOBH	MOBPHEN	MOBQ@LEPN003c01_001780&0.926267&5.9e-59	MOBV	MOBT	MOBB	F_traE	F_traH	F_traK	F_traL	F_traN	F_traU	F_traV	F_traW	F_trbC	G_ICEHIN1056_000310	G_ICEHIN1056_000410	G_ICEHIN1056_000440	G_ICEHIN1056_000510	G_ICEHIN1056_000520	I_traI	I_traK	I_traL	I_traM@LEPN003c01_001330&0.572052&3.1e-19	I_traN	I_traP	I_traQ	I_traR	I_traW	I_traY
NC_006368	Legionella_pneumophila_str._Paris,_complete_genome._	Proteobacteria;	Gammaproteobacteria	circular	3503610	3027	T4SS	NOMOB	I	T4SS_T4CP_NOMOB_I_969_O_974	503	2737	virb4@LEPN003c01_005180&0.81018&3.3e-18	traU@LEPN003c01_005180&0.988095&0	t4cp1@LEPN003c01_005080&1&8.9e-15	t4cp2@LEPN003c01_005080&0.990991&1.7e-36	t4cp3	MOBC	MOBF	MOBH	MOBPHEN	MOBQ	MOBV	MOBT	MOBB	F_traE	F_traH	F_traK	F_traL	F_traN	F_traU	F_traV	F_traW	F_trbC	G_ICEHIN1056_000310	G_ICEHIN1056_000410	G_ICEHIN1056_000440	G_ICEHIN1056_000510	G_ICEHIN1056_000520	I_traI@LEPN003c01_027260&0.970696&1.2e-73	I_traK@LEPN003c01_005030&0.896552&8.2e-23	I_traL	I_traM@LEPN003c01_005110&0.855895&5.8e-57	I_traN@LEPN003c01_005120&0.958333&3.9e-74	I_traP@LEPN003c01_005140&0.970711&8.5e-18	I_traQ@LEPN003c01_005330&0.96648&1.2e-06	I_traR@LEPN003c01_005160&0.716418&3.1e-07	I_traW	I_traY@LEPN003c01_027370&0.805369&8.8e-46&6.1e-20&9.1e-11
NC_006368	Legionella_pneumophila_str._Paris,_complete_genome._	Proteobacteria;	Gammaproteobacteria	circular	3503610	3027	T4SS	NOMOB	G	T4SS_T4CP_NOMOB_G_971	1050	1068	virb4@LEPN003c01_010550&0.815483&2.1e-61	traU	t4cp1@LEPN003c01_010500&0.945455&3.2e-13	t4cp2@LEPN003c01_010500&0.918919&1.1e-28	t4cp3	MOBC	MOBF	MOBH	MOBPHEN	MOBQ	MOBV	MOBT	MOBB	F_traE	F_traH	F_traK	F_traL	F_traN	F_traU	F_traV	F_traW	F_trbC	G_ICEHIN1056_000310@LEPN003c01_010680&0.554455&2.2e-40	G_ICEHIN1056_000410@LEPN003c01_010590&0.963801&1.1e-70	G_ICEHIN1056_000440@LEPN003c01_010560&0.963768&5.1e-29	G_ICEHIN1056_000510@LEPN003c01_010530&0.984683&1.1e-143	G_ICEHIN1056_000520@LEPN003c01_010540&0.954683&7.2e-94	I_traI	I_traK	I_traL	I_traM	I_traN	I_traP	I_traQ	I_traR	I_traW	I_traY
NC_006368	Legionella_pneumophila_str._Paris,_complete_genome._	Proteobacteria;	Gammaproteobacteria	circular	3503610	3027	T4SS	NOMOB	G	T4SS_T4CP_NOMOB_G_973	2380	2399	virb4@LEPN003c01_023930&0.826087&9.9e-63	traU	t4cp1@LEPN003c01_023990&0.945455&1.2e-11	t4cp2@LEPN003c01_023990&0.887387&9.8e-29	t4cp3	MOBC	MOBF	MOBH	MOBPHEN	MOBQ	MOBV	MOBT	MOBB	F_traE	F_traH	F_traK	F_traL	F_traN	F_traU	F_traV	F_traW	F_trbC	G_ICEHIN1056_000310@LEPN003c01_023800&0.544554&1.6e-36	G_ICEHIN1056_000410@LEPN003c01_023890&0.9819&6.6e-65	G_ICEHIN1056_000440@LEPN003c01_023920&0.949275&4.3e-37	G_ICEHIN1056_000510@LEPN003c01_023950&0.978118&6.6e-138	G_ICEHIN1056_000520@LEPN003c01_023940&0.957704&1.3e-91	I_traI	I_traK	I_traL	I_traM	I_traN	I_traP	I_traQ	I_traR	I_traW	I_traY
NC_006368	Legionella_pneumophila_str._Paris,_complete_genome._	Proteobacteria;	Gammaproteobacteria	circular	3503610	3027	NOT4SS	MOB	O	NOT4SS_NOT4CP_MOB_O_975	2995	2995	virb4	traU	t4cp1	t4cp2	t4cp3	MOBC	MOBF	MOBH@LEPN003c01_029950&0.926471&5.5e-22	MOBPHEN	MOBQ	MOBV	MOBT	MOBB	F_traE	F_traH	F_traK	F_traL	F_traN	F_traU	F_traV	F_traW	F_trbC	G_ICEHIN1056_000310	G_ICEHIN1056_000410	G_ICEHIN1056_000440	G_ICEHIN1056_000510	G_ICEHIN1056_000520	I_traI	I_traK	I_traL	I_traM	I_traN	I_traP	I_traQ	I_traR	I_traW	I_traY
NC_009494	Legionella_pneumophila_str._Corby,_complete_genome._	Proteobacteria;	Gammaproteobacteria	circular	3576470	3206	T4SS	CONJ	T	T4SS_T4CP_MOB_T_976	140	187	virb4@LEPN004c01_001730&0.823966&9.1e-190	traU	t4cp1@LEPN004c01_001810&1&1.3e-27	t4cp2@LEPN004c01_001810&0.995495&1.8e-63	t4cp3	MOBC	MOBF	MOBH	MOBPHEN@LEPN004c01_001870&0.944206&6.3e-45	MOBQ	MOBV	MOBT	MOBB	F_traE	F_traH	F_traK	F_traL	F_traN	F_traU	F_traV	F_traW	F_trbC	G_ICEHIN1056_000310	G_ICEHIN1056_000410	G_ICEHIN1056_000440	G_ICEHIN1056_000510	G_ICEHIN1056_000520	I_traI	I_traK	I_traL	I_traM@LEPN004c01_001400&0.576419&1e-19	I_traN	I_traP	I_traQ	I_traR	I_traW	I_traY
NC_009494	Legionella_pneumophila_str._Corby,_complete_genome._	Proteobacteria;	Gammaproteobacteria	circular	3576470	3206	T4SS	NOMOB	G	T4SS_T4CP_NOMOB_G_979	1824	1843	virb4@LEPN004c01_018370&0.826087&2.8e-62	traU	t4cp1@LEPN004c01_018430&0.945455&1.2e-11	t4cp2@LEPN004c01_018430&0.887387&1.1e-28	t4cp3	MOBC	MOBF	MOBH	MOBPHEN	MOBQ	MOBV	MOBT	MOBB	F_traE	F_traH	F_traK	F_traL	F_traN	F_traU	F_traV	F_traW	F_trbC	G_ICEHIN1056_000310@LEPN004c01_018240&0.549505&8.8e-38	G_ICEHIN1056_000410@LEPN004c01_018330&0.9819&7.8e-65	G_ICEHIN1056_000440@LEPN004c01_018360&0.949275&4.4e-37	G_ICEHIN1056_000510@LEPN004c01_018390&0.982495&8.1e-138	G_ICEHIN1056_000520@LEPN004c01_018380&0.933535&2e-91	I_traI	I_traK	I_traL	I_traM	I_traN	I_traP	I_traQ	I_traR	I_traW	I_traY
NC_009494	Legionella_pneumophila_str._Corby,_complete_genome._	Proteobacteria;	Gammaproteobacteria	circular	3576470	3206	T4SS	NOMOB	G	T4SS_T4CP_NOMOB_G_980	2231	2250	virb4@LEPN004c01_022440&0.820785&2.7e-62	traU	t4cp1@LEPN004c01_022500&0.945455&3.3e-13	t4cp2@LEPN004c01_022500&0.927928&7e-29	t4cp3	MOBC	MOBF	MOBH	MOBPHEN	MOBQ	MOBV	MOBT	MOBB	F_traE	F_traH	F_traK	F_traL	F_traN	F_traU	F_traV	F_traW	F_trbC	G_ICEHIN1056_000310@LEPN004c01_022310&0.554455&5e-42	G_ICEHIN1056_000410@LEPN004c01_022400&0.959276&1.9e-71	G_ICEHIN1056_000440@LEPN004c01_022430&0.963768&3.4e-29	G_ICEHIN1056_000510@LEPN004c01_022460&0.984683&3.6e-143	G_ICEHIN1056_000520@LEPN004c01_022450&0.954683&3.3e-94	I_traI	I_traK	I_traL	I_traM	I_traN	I_traP	I_traQ	I_traR	I_traW	I_traY
NC_009494	Legionella_pneumophila_str._Corby,_complete_genome._	Proteobacteria;	Gammaproteobacteria	circular	3576470	3206	T4SS	CONJ	T	T4SS_T4CP_MOB_T_982	2737	2752	virb4@LEPN004c01_027510&0.825027&5.7e-184	traU	t4cp1@LEPN004c01_027430&1&3.8e-28	t4cp2@LEPN004c01_027430&0.995495&2.2e-63	t4cp3	MOBC	MOBF	MOBH	MOBPHEN@LEPN004c01_027370&0.948498&1.3e-44	MOBQ	MOBV	MOBT	MOBB	F_traE	F_traH	F_traK	F_traL	F_traN	F_traU	F_traV	F_traW	F_trbC	G_ICEHIN1056_000310	G_ICEHIN1056_000410	G_ICEHIN1056_000440	G_ICEHIN1056_000510	G_ICEHIN1056_000520	I_traI	I_traK	I_traL	I_traM	I_traN	I_traP	I_traQ	I_traR	I_traW	I_traY
NC_009494	Legionella_pneumophila_str._Corby,_complete_genome._	Proteobacteria;	Gammaproteobacteria	circular	3576470	3206	T4SS	NOMOB	I	T4SS_T4CP_NOMOB_I_983_O_977	445	2844	virb4	traU@LEPN004c01_028290&0.988095&0	t4cp1@LEPN004c01_028390&1&8.9e-15	t4cp2@LEPN004c01_028390&0.990991&1.7e-36	t4cp3	MOBC	MOBF	MOBH	MOBPHEN	MOBQ	MOBV	MOBT	MOBB	F_traE	F_traH	F_traK	F_traL	F_traN	F_traU	F_traV	F_traW	F_trbC	G_ICEHIN1056_000310	G_ICEHIN1056_000410	G_ICEHIN1056_000440	G_ICEHIN1056_000510	G_ICEHIN1056_000520	I_traI@LEPN004c01_004570&0.970696&1.2e-73	I_traK@LEPN004c01_028440&0.896552&8.2e-23	I_traL	I_traM@LEPN004c01_028360&0.855895&5.8e-57	I_traN@LEPN004c01_028350&0.91369&9.3e-74	I_traP@LEPN004c01_028330&0.970711&3.6e-18	I_traQ@LEPN004c01_028140&0.96648&1.2e-06	I_traR@LEPN004c01_028310&0.738806&2.5e-07	I_traW	I_traY@LEPN004c01_004450&0.814765&2.3e-47&1e-20&2.8e-10
NC_009494	Legionella_pneumophila_str._Corby,_complete_genome._	Proteobacteria;	Gammaproteobacteria	circular	3576470	3206	NOT4SS	MOB	O	NOT4SS_NOT4CP_MOB_O_985	3171	3171	virb4	traU	t4cp1	t4cp2	t4cp3	MOBC	MOBF	MOBH@LEPN004c01_031710&0.926471&1e-21	MOBPHEN	MOBQ	MOBV	MOBT	MOBB	F_traE	F_traH	F_traK	F_traL	F_traN	F_traU	F_traV	F_traW	F_trbC	G_ICEHIN1056_000310	G_ICEHIN1056_000410	G_ICEHIN1056_000440	G_ICEHIN1056_000510	G_ICEHIN1056_000520	I_traI	I_traK	I_traL	I_traM	I_traN	I_traP	I_traQ	I_traR	I_traW	I_traY
NC_014125	Legionella_pneumophila_2300/99_Alcoy_chromosome,_complete_genome._	Proteobacteria;	Gammaproteobacteria	circular	3516334	3190	T4SS	CONJ	T	T4SS_T4CP_MOB_T_986	133	179	virb4@LEPN005c01_001650&0.823966&9.1e-190	traU	t4cp1@LEPN005c01_001730&1&1.3e-27	t4cp2@LEPN005c01_001730&0.995495&1.8e-63	t4cp3	MOBC	MOBF	MOBH	MOBPHEN@LEPN005c01_001790&0.944206&6.3e-45	MOBQ	MOBV	MOBT	MOBB	F_traE	F_traH	F_traK	F_traL	F_traN	F_traU	F_traV	F_traW	F_trbC	G_ICEHIN1056_000310	G_ICEHIN1056_000410	G_ICEHIN1056_000440	G_ICEHIN1056_000510	G_ICEHIN1056_000520	I_traI	I_traK	I_traL	I_traM@LEPN005c01_001330&0.576419&1.4e-19	I_traN	I_traP	I_traQ	I_traR	I_traW	I_traY
NC_014125	Legionella_pneumophila_2300/99_Alcoy_chromosome,_complete_genome._	Proteobacteria;	Gammaproteobacteria	circular	3516334	3190	T4SS	NOMOB	I	T4SS_T4CP_NOMOB_I_988_O_987_993	418	2879	virb4	traU@LEPN005c01_005200&0.988095&0	t4cp1@LEPN005c01_005100&1&8.9e-15	t4cp2@LEPN005c01_005100&0.990991&1.7e-36	t4cp3	MOBC	MOBF	MOBH	MOBPHEN	MOBQ	MOBV	MOBT	MOBB	F_traE	F_traH	F_traK	F_traL	F_traN	F_traU	F_traV	F_traW	F_trbC	G_ICEHIN1056_000310	G_ICEHIN1056_000410	G_ICEHIN1056_000440	G_ICEHIN1056_000510	G_ICEHIN1056_000520	I_traI@LEPN005c01_028680&0.970696&1.2e-73	I_traK@LEPN005c01_004180&0.655172&5.4e-05	I_traL	I_traM@LEPN005c01_005130&0.855895&5.8e-57	I_traN@LEPN005c01_005140&0.91369&9.3e-74	I_traP@LEPN005c01_005160&0.970711&2.7e-18	I_traQ@LEPN005c01_005350&0.96648&1.2e-06	I_traR@LEPN005c01_005180&0.738806&2.5e-07	I_traW	I_traY@LEPN005c01_028790&0.816107&2e-46&1.9e-20&9.8e-11
NC_014125	Legionella_pneumophila_2300/99_Alcoy_chromosome,_complete_genome._	Proteobacteria;	Gammaproteobacteria	circular	3516334	3190	T4SS	CONJ	T	T4SS_T4CP_MOB_T_989	599	614	virb4@LEPN005c01_006000&0.825027&5.7e-184	traU	t4cp1@LEPN005c01_006080&1&3.8e-28	t4cp2@LEPN005c01_006080&0.995495&2.2e-63	t4cp3	MOBC	MOBF	MOBH	MOBPHEN@LEPN005c01_006140&0.93133&2.7e-44	MOBQ	MOBV	MOBT	MOBB	F_traE	F_traH	F_traK	F_traL	F_traN	F_traU	F_traV	F_traW	F_trbC	G_ICEHIN1056_000310	G_ICEHIN1056_000410	G_ICEHIN1056_000440	G_ICEHIN1056_000510	G_ICEHIN1056_000520	I_traI	I_traK	I_traL	I_traM	I_traN	I_traP	I_traQ	I_traR	I_traW	I_traY
NC_014125	Legionella_pneumophila_2300/99_Alcoy_chromosome,_complete_genome._	Proteobacteria;	Gammaproteobacteria	circular	3516334	3190	T4SS	NOMOB	G	T4SS_T4CP_NOMOB_G_991	1103	1123	virb4@LEPN005c01_011090&0.811241&2.2e-61	traU	t4cp1@LEPN005c01_011030&0.945455&4.2e-13	t4cp2@LEPN005c01_011030&0.923423&2.2e-29	t4cp3	MOBC	MOBF	MOBH	MOBPHEN	MOBQ	MOBV	MOBT	MOBB	F_traE	F_traH	F_traK	F_traL	F_traN	F_traU	F_traV	F_traW	F_trbC	G_ICEHIN1056_000310@LEPN005c01_011230&0.544554&3.7e-42	G_ICEHIN1056_000410@LEPN005c01_011140&0.963801&1.1e-70	G_ICEHIN1056_000440@LEPN005c01_011100&0.898551&1.6e-27	G_ICEHIN1056_000510@LEPN005c01_011070&0.984683&1.1e-142	G_ICEHIN1056_000520@LEPN005c01_011080&0.951662&4.7e-94	I_traI	I_traK	I_traL	I_traM	I_traN	I_traP	I_traQ	I_traR	I_traW	I_traY
NC_014125	Legionella_pneumophila_2300/99_Alcoy_chromosome,_complete_genome._	Proteobacteria;	Gammaproteobacteria	circular	3516334	3190	NOT4SS	MOB	O	NOT4SS_NOT4CP_MOB_O_994	3151	3151	virb4	traU	t4cp1	t4cp2	t4cp3	MOBC	MOBF	MOBH@LEPN005c01_031510&0.926471&1e-21	MOBPHEN	MOBQ	MOBV	MOBT	MOBB	F_traE	F_traH	F_traK	F_traL	F_traN	F_traU	F_traV	F_traW	F_trbC	G_ICEHIN1056_000310	G_ICEHIN1056_000410	G_ICEHIN1056_000440	G_ICEHIN1056_000510	G_ICEHIN1056_000520	I_traI	I_traK	I_traL	I_traM	I_traN	I_traP	I_traQ	I_traR	I_traW	I_traY
NC_006087	Leifsonia_xyli_subsp._xyli_str._CTCB07,_complete_genome._	Actinobacteria;	Actinobacteria	circular	2584158	2030	T4SS	CONJ	O	T4SS_T4CP_MOB_O_995	595	597	virb4@LEXY001c01_005950&0.773065&4.2e-88	traU	t4cp1	t4cp2@LEXY001c01_005960&0.941441&1.3e-40	t4cp3	MOBC	MOBF	MOBH	MOBPHEN@LEXY001c01_005970&0.918455&1.4e-30	MOBQ	MOBV	MOBT	MOBB	F_traE	F_traH	F_traK	F_traL	F_traN	F_traU	F_traV	F_traW	F_trbC	G_ICEHIN1056_000310	G_ICEHIN1056_000410	G_ICEHIN1056_000440	G_ICEHIN1056_000510	G_ICEHIN1056_000520	I_traI	I_traK	I_traL	I_traM	I_traN	I_traP	I_traQ	I_traR	I_traW	I_traY
NC_003210	Listeria_monocytogenes_EGD-e,_complete_genome._	Firmicutes;	FA	circular	2944528	2846	T4SS	CONJ	O	T4SS_T4CP_MOB_O_996	1120	1126	virb4@LIMO001c01_011200&0.720042&6e-27	traU	t4cp1	t4cp2	t4cp3@LIMO001c01_011260&0.997845&3.9e-256	MOBC	MOBF	MOBH	MOBPHEN	MOBQ	MOBV	MOBT@LIMO001c01_011250&0.997268&1.7e-153	MOBB	F_traE	F_traH	F_traK	F_traL	F_traN	F_traU	F_traV	F_traW	F_trbC	G_ICEHIN1056_000310	G_ICEHIN1056_000410	G_ICEHIN1056_000440	G_ICEHIN1056_000510	G_ICEHIN1056_000520	I_traI	I_traK	I_traL	I_traM	I_traN	I_traP	I_traQ	I_traR	I_traW	I_traY
NC_013766	Listeria_monocytogenes_08-5578,_complete_genome._	Firmicutes;	Firmicutes	circular	3032288	3010	T4SS	CONJ	O	T4SS_T4CP_MOB_O_999	1891	1903	virb4@LIMO005c01_019030&0.560976&1.1e-62	traU	t4cp1@LIMO005c01_018910&0.990909&2.6e-08	t4cp2@LIMO005c01_018910&0.945946&1.5e-45	t4cp3	MOBC	MOBF	MOBH	MOBPHEN@LIMO005c01_018930&0.506438&2.4e-06	MOBQ	MOBV	MOBT	MOBB	F_traE	F_traH	F_traK	F_traL	F_traN	F_traU	F_traV	F_traW	F_trbC	G_ICEHIN1056_000310	G_ICEHIN1056_000410	G_ICEHIN1056_000440	G_ICEHIN1056_000510	G_ICEHIN1056_000520	I_traI	I_traK	I_traL	I_traM	I_traN	I_traP	I_traQ	I_traR	I_traW	I_traY
NC_013768	Listeria_monocytogenes_08-5923,_complete_genome._	Firmicutes;	Firmicutes	circular	2999054	2966	T4SS	CONJ	O	T4SS_T4CP_MOB_O_1000	1848	1860	virb4@LIMO006c01_018600&0.560976&1.1e-62	traU	t4cp1@LIMO006c01_018480&0.990909&2.6e-08	t4cp2@LIMO006c01_018480&0.945946&1.5e-45	t4cp3	MOBC	MOBF	MOBH	MOBPHEN@LIMO006c01_018500&0.506438&2.4e-06	MOBQ	MOBV	MOBT	MOBB	F_traE	F_traH	F_traK	F_traL	F_traN	F_traU	F_traV	F_traW	F_trbC	G_ICEHIN1056_000310	G_ICEHIN1056_000410	G_ICEHIN1056_000440	G_ICEHIN1056_000510	G_ICEHIN1056_000520	I_traI	I_traK	I_traL	I_traM	I_traN	I_traP	I_traQ	I_traR	I_traW	I_traY
NC_008555	Listeria_welshimeri_serovar_6b_str._SLCC5334,_complete_genome._	Firmicutes;	FA	circular	2814130	2774	T4SS	CONJ	O	T4SS_T4CP_MOB_O_1003	785	794	virb4@LIWE001c01_007940&0.732768&2e-23	traU	t4cp1	t4cp2	t4cp3@LIWE001c01_007850&0.965517&1.3e-98	MOBC	MOBF	MOBH	MOBPHEN	MOBQ	MOBV	MOBT@LIWE001c01_007890&0.994536&1.5e-120	MOBB	F_traE	F_traH	F_traK	F_traL	F_traN	F_traU	F_traV	F_traW	F_trbC	G_ICEHIN1056_000310	G_ICEHIN1056_000410	G_ICEHIN1056_000440	G_ICEHIN1056_000510	G_ICEHIN1056_000520	I_traI	I_traK	I_traL	I_traM	I_traN	I_traP	I_traQ	I_traR	I_traW	I_traY
NC_008740	Marinobacter_aquaeolei_VT8,_complete_genome._	Proteobacteria;	Gammaproteobacteria	circular	4326849	3858	NOT4SS	MOB	O	NOT4SS_NOT4CP_MOB_O_1007	395	395	virb4	traU	t4cp1	t4cp2	t4cp3	MOBC	MOBF	MOBH	MOBPHEN	MOBQ	MOBV@MAAQ001c01_003950&0.965686&4.8e-46	MOBT	MOBB	F_traE	F_traH	F_traK	F_traL	F_traN	F_traU	F_traV	F_traW	F_trbC	G_ICEHIN1056_000310	G_ICEHIN1056_000410	G_ICEHIN1056_000440	G_ICEHIN1056_000510	G_ICEHIN1056_000520	I_traI	I_traK	I_traL	I_traM	I_traN	I_traP	I_traQ	I_traR	I_traW	I_traY
NC_008347	Maricaulis_maris_MCS10,_complete_genome._	Proteobacteria;	Alphaproteobacteria	circular	3368780	3063	NOT4SS	MOB	O	NOT4SS_T4CP_MOB_O_1011	2365	2385	virb4	traU	t4cp1@MAMR001c01_023850&0.990909&1.3e-25	t4cp2@MAMR001c01_023850&0.995495&5e-38	t4cp3	MOBC	MOBF	MOBH	MOBPHEN@MAMR001c01_023650&0.961373&1.6e-38	MOBQ	MOBV	MOBT	MOBB	F_traE	F_traH	F_traK	F_traL	F_traN	F_traU	F_traV	F_traW	F_trbC	G_ICEHIN1056_000310	G_ICEHIN1056_000410	G_ICEHIN1056_000440	G_ICEHIN1056_000510	G_ICEHIN1056_000520	I_traI	I_traK	I_traL	I_traM	I_traN	I_traP	I_traQ	I_traR	I_traW	I_traY
NC_014207	Methylotenera_sp._301_chromosome,_complete_genome._	Proteobacteria;	Betaproteobacteria	circular	3059871	2764	NOT4SS	MOB	O	NOT4SS_NOT4CP_MOB_O_1014	1825	1825	virb4	traU	t4cp1	t4cp2	t4cp3	MOBC@ME30001c01_018250&0.597156&0.00038	MOBF	MOBH	MOBPHEN	MOBQ	MOBV	MOBT	MOBB	F_traE	F_traH	F_traK	F_traL	F_traN	F_traU	F_traV	F_traW	F_trbC	G_ICEHIN1056_000310	G_ICEHIN1056_000410	G_ICEHIN1056_000440	G_ICEHIN1056_000510	G_ICEHIN1056_000520	I_traI	I_traK	I_traL	I_traM	I_traN	I_traP	I_traQ	I_traR	I_traW	I_traY
NC_014207	Methylotenera_sp._301_chromosome,_complete_genome._	Proteobacteria;	Betaproteobacteria	circular	3059871	2764	NOT4SS	MOB	O	NOT4SS_NOT4CP_MOB_O_1015	2577	2577	virb4	traU	t4cp1	t4cp2	t4cp3	MOBC	MOBF	MOBH	MOBPHEN	MOBQ	MOBV	MOBT@ME30001c01_025770&0.54918&3.4e-11	MOBB	F_traE	F_traH	F_traK	F_traL	F_traN	F_traU	F_traV	F_traW	F_trbC	G_ICEHIN1056_000310	G_ICEHIN1056_000410	G_ICEHIN1056_000440	G_ICEHIN1056_000510	G_ICEHIN1056_000520	I_traI	I_traK	I_traL	I_traM	I_traN	I_traP	I_traQ	I_traR	I_traW	I_traY
NC_012988	Methylobacterium_extorquens_DM4,_complete_genome._	Proteobacteria;	Alphaproteobacteria	circular	5943768	5599	NOT4SS	MOB	O	NOT4SS_NOT4CP_MOB_O_1023	2408	2408	virb4	traU	t4cp1	t4cp2	t4cp3	MOBC	MOBF	MOBH	MOBPHEN@MEEX003c01_024080&0.536481&2.4e-13	MOBQ	MOBV	MOBT	MOBB	F_traE	F_traH	F_traK	F_traL	F_traN	F_traU	F_traV	F_traW	F_trbC	G_ICEHIN1056_000310	G_ICEHIN1056_000410	G_ICEHIN1056_000440	G_ICEHIN1056_000510	G_ICEHIN1056_000520	I_traI	I_traK	I_traL	I_traM	I_traN	I_traP	I_traQ	I_traR	I_traW	I_traY
NC_012988	Methylobacterium_extorquens_DM4,_complete_genome._	Proteobacteria;	Alphaproteobacteria	circular	5943768	5599	NOT4SS	MOB	O	NOT4SS_NOT4CP_MOB_O_1025	4205	4205	virb4	traU	t4cp1	t4cp2	t4cp3	MOBC	MOBF	MOBH	MOBPHEN@MEEX003c01_042050&0.549356&8.8e-08	MOBQ	MOBV	MOBT	MOBB	F_traE	F_traH	F_traK	F_traL	F_traN	F_traU	F_traV	F_traW	F_trbC	G_ICEHIN1056_000310	G_ICEHIN1056_000410	G_ICEHIN1056_000440	G_ICEHIN1056_000510	G_ICEHIN1056_000520	I_traI	I_traK	I_traL	I_traM	I_traN	I_traP	I_traQ	I_traR	I_traW	I_traY
NC_010794	Methylacidiphilum_infernorum_V4,_complete_genome._	Verrucomicrobia;	Verrucomicrobia	circular	2287145	2472	T4SS	NOMOB	O	T4SS_T4CP_NOMOB_O_1027	1195	1222	virb4@MEIN001c01_012220&0.748674&1.6e-72	traU	t4cp1@MEIN001c01_011950&0.8&5.3e-08	t4cp2@MEIN001c01_011950&0.927928&5e-20	t4cp3	MOBC	MOBF	MOBH	MOBPHEN	MOBQ	MOBV	MOBT	MOBB	F_traE	F_traH	F_traK	F_traL	F_traN	F_traU	F_traV	F_traW	F_trbC	G_ICEHIN1056_000310	G_ICEHIN1056_000410	G_ICEHIN1056_000440	G_ICEHIN1056_000510	G_ICEHIN1056_000520	I_traI	I_traK	I_traL	I_traM	I_traN	I_traP	I_traQ	I_traR	I_traW	I_traY
NC_002678	Mesorhizobium_loti_MAFF303099,_complete_genome._	Proteobacteria;	Alphaproteobacteria	circular	7036071	6743	NOT4SS	MOB	O	NOT4SS_NOT4CP_MOB_O_1028	765	765	virb4	traU	t4cp1	t4cp2	t4cp3	MOBC	MOBF@MELO001c01_007650&0.606818&1.5e-66&5e-22	MOBH	MOBPHEN	MOBQ@MELO001c01_007650&0.995392&1.7e-80	MOBV	MOBT	MOBB	F_traE	F_traH	F_traK	F_traL	F_traN	F_traU	F_traV	F_traW	F_trbC	G_ICEHIN1056_000310	G_ICEHIN1056_000410	G_ICEHIN1056_000440	G_ICEHIN1056_000510	G_ICEHIN1056_000520	I_traI	I_traK	I_traL	I_traM	I_traN	I_traP	I_traQ	I_traR	I_traW	I_traY
NC_002678	Mesorhizobium_loti_MAFF303099,_complete_genome._	Proteobacteria;	Alphaproteobacteria	circular	7036071	6743	NOT4SS	MOB	O	NOT4SS_NOT4CP_MOB_O_1030	4484	4484	virb4	traU	t4cp1	t4cp2	t4cp3	MOBC	MOBF@MELO001c01_044840&0.607955&2.2e-67&6.7e-22	MOBH	MOBPHEN	MOBQ@MELO001c01_044840&0.995392&1.1e-79	MOBV	MOBT	MOBB	F_traE	F_traH	F_traK	F_traL	F_traN	F_traU	F_traV	F_traW	F_trbC	G_ICEHIN1056_000310	G_ICEHIN1056_000410	G_ICEHIN1056_000440	G_ICEHIN1056_000510	G_ICEHIN1056_000520	I_traI	I_traK	I_traL	I_traM	I_traN	I_traP	I_traQ	I_traR	I_traW	I_traY
NC_002678	Mesorhizobium_loti_MAFF303099,_complete_genome._	Proteobacteria;	Alphaproteobacteria	circular	7036071	6743	NOT4SS	MOB	O	NOT4SS_NOT4CP_MOB_O_1031	4880	4880	virb4	traU	t4cp1	t4cp2	t4cp3	MOBC	MOBF	MOBH	MOBPHEN@MELO001c01_048800&0.93133&1.2e-21	MOBQ	MOBV	MOBT	MOBB	F_traE	F_traH	F_traK	F_traL	F_traN	F_traU	F_traV	F_traW	F_trbC	G_ICEHIN1056_000310	G_ICEHIN1056_000410	G_ICEHIN1056_000440	G_ICEHIN1056_000510	G_ICEHIN1056_000520	I_traI	I_traK	I_traL	I_traM	I_traN	I_traP	I_traQ	I_traR	I_traW	I_traY
NC_002678	Mesorhizobium_loti_MAFF303099,_complete_genome._	Proteobacteria;	Alphaproteobacteria	circular	7036071	6743	T4SS	NOMOB	T	T4SS_T4CP_NOMOB_T_1032	5056	5065	virb4@MELO001c01_050610&0.825027&3e-181	traU	t4cp1@MELO001c01_050560&1&2.6e-24	t4cp2@MELO001c01_050560&1&3.5e-57	t4cp3	MOBC	MOBF	MOBH	MOBPHEN	MOBQ	MOBV	MOBT	MOBB	F_traE	F_traH	F_traK	F_traL	F_traN	F_traU	F_traV	F_traW	F_trbC	G_ICEHIN1056_000310	G_ICEHIN1056_000410	G_ICEHIN1056_000440	G_ICEHIN1056_000510	G_ICEHIN1056_000520	I_traI	I_traK	I_traL	I_traM	I_traN	I_traP	I_traQ	I_traR	I_traW	I_traY
NC_012968	Methylotenera_mobilis_JLW8,_complete_genome._	Proteobacteria;	Betaproteobacteria	circular	2547570	2338	NOT4SS	MOB	O	NOT4SS_NOT4CP_MOB_O_1034	238	238	virb4	traU	t4cp1	t4cp2	t4cp3	MOBC	MOBF	MOBH	MOBPHEN@MEMO001c01_002380&0.995708&4.1e-30	MOBQ	MOBV	MOBT	MOBB	F_traE	F_traH	F_traK	F_traL	F_traN	F_traU	F_traV	F_traW	F_trbC	G_ICEHIN1056_000310	G_ICEHIN1056_000410	G_ICEHIN1056_000440	G_ICEHIN1056_000510	G_ICEHIN1056_000520	I_traI	I_traK	I_traL	I_traM	I_traN	I_traP	I_traQ	I_traR	I_traW	I_traY
NC_009637	Methanococcus_maripaludis_C7,_complete_genome._	Euryarchaeota;	Euryarchaeota	circular	1772694	1788	NOT4SS	MOB	O	NOT4SS_NOT4CP_MOB_O_1035	1574	1574	virb4	traU	t4cp1	t4cp2	t4cp3	MOBC	MOBF	MOBH	MOBPHEN@MEMP004c01_015740&0.579399&0.0059&0.0057	MOBQ	MOBV	MOBT	MOBB	F_traE	F_traH	F_traK	F_traL	F_traN	F_traU	F_traV	F_traW	F_trbC	G_ICEHIN1056_000310	G_ICEHIN1056_000410	G_ICEHIN1056_000440	G_ICEHIN1056_000510	G_ICEHIN1056_000520	I_traI	I_traK	I_traL	I_traM	I_traN	I_traP	I_traQ	I_traR	I_traW	I_traY
NC_008825	Methylibium_petroleiphilum_PM1,_complete_genome._	Proteobacteria;	Betaproteobacteria	circular	4044195	3819	T4SS	CONJ	G	T4SS_T4CP_MOB_G_1040	2398	2428	virb4@MEPE001c01_024170&0.828208&1.9e-94	traU	t4cp1@MEPE001c01_024030&0.990909&7.8e-11	t4cp2@MEPE001c01_024030&0.95045&6.7e-31	t4cp3	MOBC	MOBF	MOBH@MEPE001c01_024280&0.921569&4.1e-43	MOBPHEN	MOBQ	MOBV	MOBT	MOBB	F_traE	F_traH	F_traK	F_traL@MEPE001c01_024120&0.67&0.001	F_traN	F_traU	F_traV	F_traW	F_trbC	G_ICEHIN1056_000310@MEPE001c01_023980&0.871287&6e-62	G_ICEHIN1056_000410@MEPE001c01_024130&0.959276&1.8e-109	G_ICEHIN1056_000440@MEPE001c01_024160&0.992754&1.1e-64	G_ICEHIN1056_000510@MEPE001c01_024220&0.984683&2.8e-198	G_ICEHIN1056_000520@MEPE001c01_024210&0.978852&3.6e-146	I_traI	I_traK	I_traL	I_traM	I_traN	I_traP	I_traQ	I_traR	I_traW	I_traY
NC_010725	Methylobacterium_populi_BJ001,_complete_genome._	Proteobacteria;	Alphaproteobacteria	circular	5800441	5314	T4SS	CONJ	T	T4SS_T4CP_MOB_T_1045	3095	3106	virb4@MEPO001c01_031010&0.820785&1.5e-174	traU	t4cp1@MEPO001c01_030960&1&8.1e-26	t4cp2@MEPO001c01_030960&1&3.2e-55	t4cp3	MOBC	MOBF	MOBH	MOBPHEN@MEPO001c01_030950&0.862661&9.8e-29	MOBQ	MOBV	MOBT	MOBB	F_traE	F_traH	F_traK	F_traL	F_traN	F_traU	F_traV	F_traW	F_trbC	G_ICEHIN1056_000310	G_ICEHIN1056_000410	G_ICEHIN1056_000440	G_ICEHIN1056_000510	G_ICEHIN1056_000520	I_traI	I_traK	I_traL	I_traM	I_traN	I_traP	I_traQ	I_traR	I_traW	I_traY
NC_010725	Methylobacterium_populi_BJ001,_complete_genome._	Proteobacteria;	Alphaproteobacteria	circular	5800441	5314	NOT4SS	MOB	O	NOT4SS_T4CP_MOB_O_1046	5114	5117	virb4	traU	t4cp1	t4cp2@MEPO001c01_051140&0.851351&3.7e-20	t4cp3	MOBC	MOBF	MOBH	MOBPHEN@MEPO001c01_051170&0.978541&3.5e-23	MOBQ	MOBV	MOBT	MOBB	F_traE	F_traH	F_traK	F_traL	F_traN	F_traU	F_traV	F_traW	F_trbC	G_ICEHIN1056_000310	G_ICEHIN1056_000410	G_ICEHIN1056_000440	G_ICEHIN1056_000510	G_ICEHIN1056_000520	I_traI	I_traK	I_traL	I_traM	I_traN	I_traP	I_traQ	I_traR	I_traW	I_traY
NC_013946	Meiothermus_ruber_DSM_1279_chromosome,_complete_genome._	Deinococcus-Thermus;	Deinococcus-Thermus	circular	3097457	3014	T4SS	NOMOB	O	T4SS_T4CP_NOMOB_O_1049	522	526	virb4@MERB001c01_005220&0.765642&2.5e-84	traU	t4cp1@MERB001c01_005260&0.954545&6.1e-10	t4cp2@MERB001c01_005260&0.869369&2e-30	t4cp3	MOBC	MOBF	MOBH	MOBPHEN	MOBQ	MOBV	MOBT	MOBB	F_traE	F_traH	F_traK	F_traL	F_traN	F_traU	F_traV	F_traW	F_trbC	G_ICEHIN1056_000310	G_ICEHIN1056_000410	G_ICEHIN1056_000440	G_ICEHIN1056_000510	G_ICEHIN1056_000520	I_traI	I_traK	I_traL	I_traM	I_traN	I_traP	I_traQ	I_traR	I_traW	I_traY
NC_009440	Metallosphaera_sedula_DSM_5348,_complete_genome._	Crenarchaeota;	Crenarchaeota	circular	2191517	2256	T4SS	NOMOB	O	T4SS_NOT4CP_NOMOB_O_1050	2191	2191	virb4@MESE001c01_021910&0.572641&5.1e-69	traU	t4cp1	t4cp2	t4cp3	MOBC	MOBF	MOBH	MOBPHEN	MOBQ	MOBV	MOBT	MOBB	F_traE	F_traH	F_traK	F_traL	F_traN	F_traU	F_traV	F_traW	F_trbC	G_ICEHIN1056_000310	G_ICEHIN1056_000410	G_ICEHIN1056_000440	G_ICEHIN1056_000510	G_ICEHIN1056_000520	I_traI	I_traK	I_traL	I_traM	I_traN	I_traP	I_traQ	I_traR	I_traW	I_traY
NC_012969	Methylovorus_sp._SIP3-4,_complete_genome._	Proteobacteria;	Betaproteobacteria	circular	2995511	2818	NOT4SS	MOB	O	NOT4SS_T4CP_MOB_O_1051	2075	2118	virb4	traU	t4cp1@MESI001c01_020790&0.990909&5.6e-13	t4cp2@MESI001c01_020790&0.72973&1.8e-15@MESI001c01_020750&0.90991&7.3e-16	t4cp3	MOBC	MOBF@MESI001c01_020840&0.615909&7e-05&7.6e-48&2.2e-12	MOBH	MOBPHEN	MOBQ	MOBV	MOBT	MOBB	F_traE	F_traH	F_traK	F_traL	F_traN	F_traU	F_traV	F_traW	F_trbC	G_ICEHIN1056_000310	G_ICEHIN1056_000410	G_ICEHIN1056_000440	G_ICEHIN1056_000510	G_ICEHIN1056_000520	I_traI	I_traK	I_traL	I_traM	I_traN	I_traP	I_traQ	I_traR	I_traW	I_traY@MESI001c01_021180&0.958389&1.9e-79
NC_012969	Methylovorus_sp._SIP3-4,_complete_genome._	Proteobacteria;	Betaproteobacteria	circular	2995511	2818	NOT4SS	MOB	O	NOT4SS_NOT4CP_MOB_O_1052	2414	2436	virb4	traU	t4cp1	t4cp2	t4cp3	MOBC	MOBF	MOBH	MOBPHEN@MESI001c01_024160&0.939914&2.3e-31	MOBQ	MOBV	MOBT	MOBB	F_traE	F_traH	F_traK	F_traL	F_traN	F_traU	F_traV	F_traW	F_trbC	G_ICEHIN1056_000310	G_ICEHIN1056_000410	G_ICEHIN1056_000440@MESI001c01_024360&0.630435&0.0013	G_ICEHIN1056_000510	G_ICEHIN1056_000520	I_traI	I_traK	I_traL	I_traM	I_traN	I_traP	I_traQ	I_traR	I_traW	I_traY
NC_011666	Methylocella_silvestris_BL2,_complete_genome._	Proteobacteria;	Alphaproteobacteria	circular	4305430	3818	NOT4SS	MOB	O	NOT4SS_T4CP_MOB_O_1054	1962	1966	virb4	traU	t4cp1@MESL001c01_019620&0.981818&5.8e-14	t4cp2@MESL001c01_019620&0.995495&4.8e-37	t4cp3	MOBC	MOBF	MOBH	MOBPHEN@MESL001c01_019660&0.982833&1.4e-21	MOBQ	MOBV	MOBT	MOBB	F_traE	F_traH	F_traK	F_traL	F_traN	F_traU	F_traV	F_traW	F_trbC	G_ICEHIN1056_000310	G_ICEHIN1056_000410	G_ICEHIN1056_000440	G_ICEHIN1056_000510	G_ICEHIN1056_000520	I_traI	I_traK	I_traL	I_traM	I_traN	I_traP	I_traQ	I_traR	I_traW	I_traY
NC_008254	Mesorhizobium_sp._BNC1,_complete_genome._	Proteobacteria;	Alphaproteobacteria	circular	4412446	4064	T4SS	CONJ	T	T4SS_T4CP_MOB_T_1055	506	521	virb4@MESP001c01_005110&0.820785&8.8e-175	traU	t4cp1@MESP001c01_005200&1&5.9e-26	t4cp2@MESP001c01_005200&1&2.6e-56	t4cp3	MOBC	MOBF	MOBH	MOBPHEN@MESP001c01_005210&0.755365&3.4e-26	MOBQ	MOBV	MOBT	MOBB	F_traE	F_traH	F_traK	F_traL	F_traN	F_traU	F_traV	F_traW	F_trbC	G_ICEHIN1056_000310	G_ICEHIN1056_000410	G_ICEHIN1056_000440	G_ICEHIN1056_000510	G_ICEHIN1056_000520	I_traI	I_traK	I_traL	I_traM	I_traN	I_traP	I_traQ	I_traR	I_traW	I_traY
NC_008254	Mesorhizobium_sp._BNC1,_complete_genome._	Proteobacteria;	Alphaproteobacteria	circular	4412446	4064	T4SS	CONJ	T	T4SS_T4CP_MOB_T_1056	2332	2346	virb4@MESP001c01_023370&0.821845&1.2e-175	traU	t4cp1@MESP001c01_023430&1&6.4e-26	t4cp2@MESP001c01_023430&1&1.3e-54	t4cp3	MOBC	MOBF	MOBH	MOBPHEN@MESP001c01_023460&0.708155&2.7e-25	MOBQ	MOBV	MOBT	MOBB	F_traE	F_traH	F_traK	F_traL	F_traN	F_traU	F_traV	F_traW	F_trbC	G_ICEHIN1056_000310	G_ICEHIN1056_000410	G_ICEHIN1056_000440	G_ICEHIN1056_000510	G_ICEHIN1056_000520	I_traI	I_traK	I_traL	I_traM	I_traN	I_traP	I_traQ	I_traR	I_traW	I_traY
NC_008254	Mesorhizobium_sp._BNC1,_complete_genome._	Proteobacteria;	Alphaproteobacteria	circular	4412446	4064	T4SS	CONJ	T	T4SS_T4CP_MOB_T_1057	3805	3874	virb4@MESP001c01_038690&0.815483&3e-172	traU	t4cp1@MESP001c01_038640&1&2.2e-24	t4cp2@MESP001c01_038640&1&1e-56	t4cp3	MOBC	MOBF	MOBH	MOBPHEN@MESP001c01_038630&0.729614&8.7e-27@MESP001c01_038050&0.935622&1.1e-17	MOBQ	MOBV	MOBT	MOBB	F_traE	F_traH	F_traK	F_traL	F_traN	F_traU	F_traV	F_traW	F_trbC	G_ICEHIN1056_000310	G_ICEHIN1056_000410	G_ICEHIN1056_000440	G_ICEHIN1056_000510	G_ICEHIN1056_000520	I_traI	I_traK	I_traL	I_traM	I_traN	I_traP	I_traQ	I_traR	I_traW	I_traY
NC_014212	Meiothermus_silvanus_DSM_9946_chromosome,_complete_genome._	Deinococcus-Thermus;	Deinococcus-Thermus	circular	3249394	3072	T4SS	NOMOB	O	T4SS_T4CP_NOMOB_O_1058	501	505	virb4@MESV001c01_005010&0.803818&3.3e-84	traU	t4cp1@MESV001c01_005050&0.954545&2.9e-11	t4cp2@MESV001c01_005050&0.869369&6e-31	t4cp3	MOBC	MOBF	MOBH	MOBPHEN	MOBQ	MOBV	MOBT	MOBB	F_traE	F_traH	F_traK	F_traL	F_traN	F_traU	F_traV	F_traW	F_trbC	G_ICEHIN1056_000310	G_ICEHIN1056_000410	G_ICEHIN1056_000440	G_ICEHIN1056_000510	G_ICEHIN1056_000520	I_traI	I_traK	I_traL	I_traM	I_traN	I_traP	I_traQ	I_traR	I_traW	I_traY
NC_007644	Moorella_thermoacetica_ATCC_39073,_complete_genome._	Firmicutes;	FA	circular	2628784	2465	T4SS	NOMOB	O	T4SS_T4CP_NOMOB_O_1059	314	373	virb4@MOTH001c01_003160&0.716861&4.5e-34	traU	t4cp1@MOTH001c01_003730&0.981818&9.7e-21	t4cp2@MOTH001c01_003730&0.941441&2e-42	t4cp3	MOBC	MOBF	MOBH	MOBPHEN	MOBQ	MOBV	MOBT	MOBB	F_traE	F_traH	F_traK	F_traL	F_traN	F_traU	F_traV	F_traW	F_trbC	G_ICEHIN1056_000310	G_ICEHIN1056_000410	G_ICEHIN1056_000440	G_ICEHIN1056_000510	G_ICEHIN1056_000520	I_traI	I_traK	I_traL	I_traM	I_traN	I_traP	I_traQ	I_traR@MOTH001c01_003140&0.723881&5.5e-05	I_traW	I_traY
NC_009497	Mycoplasma_agalactiae_PG2,_complete_genome._	Tenericutes;	Tenericutes	circular	877438	742	T4SS	NOMOB	O	T4SS_T4CP_NOMOB_O_1060	413	426	virb4@MYAG001c01_004130&0.566278&3.5e-68	traU	t4cp1@MYAG001c01_004260&0.972727&8.8e-10	t4cp2@MYAG001c01_004260&0.959459&1.3e-35	t4cp3	MOBC	MOBF	MOBH	MOBPHEN	MOBQ	MOBV	MOBT	MOBB	F_traE	F_traH	F_traK	F_traL	F_traN	F_traU	F_traV	F_traW	F_trbC	G_ICEHIN1056_000310	G_ICEHIN1056_000410	G_ICEHIN1056_000440	G_ICEHIN1056_000510	G_ICEHIN1056_000520	I_traI	I_traK	I_traL	I_traM	I_traN	I_traP	I_traQ	I_traR	I_traW	I_traY
NC_007633	Mycoplasma_capricolum_subsp._capricolum_ATCC_27343,_complete_genome._	Tenericutes;	Tenericutes	circular	1010023	812	T4SS	NOMOB	O	T4SS_NOT4CP_NOMOB_O_1061	169	169	virb4@MYCA001c01_001690&0.803818&5.2e-77	traU	t4cp1	t4cp2	t4cp3	MOBC	MOBF	MOBH	MOBPHEN	MOBQ	MOBV	MOBT	MOBB	F_traE	F_traH	F_traK	F_traL	F_traN	F_traU	F_traV	F_traW	F_trbC	G_ICEHIN1056_000310	G_ICEHIN1056_000410	G_ICEHIN1056_000440	G_ICEHIN1056_000510	G_ICEHIN1056_000520	I_traI	I_traK	I_traL	I_traM	I_traN	I_traP	I_traQ	I_traR	I_traW	I_traY
NC_007633	Mycoplasma_capricolum_subsp._capricolum_ATCC_27343,_complete_genome._	Tenericutes;	Tenericutes	circular	1010023	812	T4SS	NOMOB	O	T4SS_NOT4CP_NOMOB_O_1062	288	288	virb4@MYCA001c01_002880&0.774125&1.3e-65	traU	t4cp1	t4cp2	t4cp3	MOBC	MOBF	MOBH	MOBPHEN	MOBQ	MOBV	MOBT	MOBB	F_traE	F_traH	F_traK	F_traL	F_traN	F_traU	F_traV	F_traW	F_trbC	G_ICEHIN1056_000310	G_ICEHIN1056_000410	G_ICEHIN1056_000440	G_ICEHIN1056_000510	G_ICEHIN1056_000520	I_traI	I_traK	I_traL	I_traM	I_traN	I_traP	I_traQ	I_traR	I_traW	I_traY
NC_007633	Mycoplasma_capricolum_subsp._capricolum_ATCC_27343,_complete_genome._	Tenericutes;	Tenericutes	circular	1010023	812	T4SS	NOMOB	O	T4SS_T4CP_NOMOB_O_1063	541	547	virb4@MYCA001c01_005470&0.756098&7.9e-64	traU	t4cp1@MYCA001c01_005410&0.963636&2.4e-08	t4cp2@MYCA001c01_005410&0.963964&4.2e-32	t4cp3	MOBC	MOBF	MOBH	MOBPHEN	MOBQ	MOBV	MOBT	MOBB	F_traE	F_traH	F_traK	F_traL	F_traN	F_traU	F_traV	F_traW	F_trbC	G_ICEHIN1056_000310	G_ICEHIN1056_000410	G_ICEHIN1056_000440	G_ICEHIN1056_000510	G_ICEHIN1056_000520	I_traI	I_traK	I_traL	I_traM	I_traN	I_traP	I_traQ	I_traR	I_traW	I_traY
NC_009338	Mycobacterium_gilvum_PYR-GCK,_complete_genome._	Actinobacteria;	Actinobacteria	circular	5619607	5241	NOT4SS	MOB	O	NOT4SS_NOT4CP_MOB_O_1064	2806	2806	virb4	traU	t4cp1	t4cp2	t4cp3	MOBC	MOBF@MYGI001c01_028060&0.996591&3.8e-177	MOBH	MOBPHEN	MOBQ	MOBV	MOBT	MOBB	F_traE	F_traH	F_traK	F_traL	F_traN	F_traU	F_traV	F_traW	F_trbC	G_ICEHIN1056_000310	G_ICEHIN1056_000410	G_ICEHIN1056_000440	G_ICEHIN1056_000510	G_ICEHIN1056_000520	I_traI	I_traK	I_traL	I_traM	I_traN	I_traP	I_traQ	I_traR	I_traW	I_traY
NC_007295	Mycoplasma_hyopneumoniae_J,_complete_genome._	Tenericutes;	Tenericutes	circular	897405	657	T4SS	NOMOB	O	T4SS_NOT4CP_NOMOB_O_1065	250	250	virb4@MYHY001c01_002500&0.757158&4.1e-67	traU	t4cp1@MYHY001c01_002500&0.572727&0.003	t4cp2	t4cp3	MOBC	MOBF	MOBH	MOBPHEN	MOBQ	MOBV	MOBT	MOBB	F_traE	F_traH	F_traK	F_traL	F_traN	F_traU	F_traV	F_traW	F_trbC	G_ICEHIN1056_000310	G_ICEHIN1056_000410	G_ICEHIN1056_000440	G_ICEHIN1056_000510	G_ICEHIN1056_000520	I_traI	I_traK	I_traL	I_traM	I_traN	I_traP	I_traQ	I_traR	I_traW	I_traY
NC_006360	Mycoplasma_hyopneumoniae_232,_complete_genome._	Tenericutes;	Tenericutes	circular	892758	691	T4SS	NOMOB	O	T4SS_NOT4CP_NOMOB_O_1067	137	137	virb4@MYHY002c01_001370&0.752916&3.2e-67	traU	t4cp1@MYHY002c01_001370&0.572727&0.003	t4cp2	t4cp3	MOBC	MOBF	MOBH	MOBPHEN	MOBQ	MOBV	MOBT	MOBB	F_traE	F_traH	F_traK	F_traL	F_traN	F_traU	F_traV	F_traW	F_trbC	G_ICEHIN1056_000310	G_ICEHIN1056_000410	G_ICEHIN1056_000440	G_ICEHIN1056_000510	G_ICEHIN1056_000520	I_traI	I_traK	I_traL	I_traM	I_traN	I_traP	I_traQ	I_traR	I_traW	I_traY
NC_006360	Mycoplasma_hyopneumoniae_232,_complete_genome._	Tenericutes;	Tenericutes	circular	892758	691	NOT4SS	MOB	O	NOT4SS_T4CP_MOB_O_1068	509	547	virb4	traU	t4cp1@MYHY002c01_005470&0.963636&3.4e-08	t4cp2@MYHY002c01_005470&0.927928&4.3e-38	t4cp3	MOBC	MOBF	MOBH	MOBPHEN@MYHY002c01_005430&0.613734&7.8e-07	MOBQ	MOBV	MOBT	MOBB	F_traE	F_traH	F_traK	F_traL	F_traN	F_traU	F_traV	F_traW	F_trbC	G_ICEHIN1056_000310	G_ICEHIN1056_000410	G_ICEHIN1056_000440	G_ICEHIN1056_000510	G_ICEHIN1056_000520	I_traI	I_traK	I_traL	I_traM	I_traN	I_traP	I_traQ	I_traR	I_traW	I_traY
NC_007332	Mycoplasma_hyopneumoniae_7448,_complete_genome._	Tenericutes;	Tenericutes	circular	920079	663	T4SS	NOMOB	O	T4SS_NOT4CP_NOMOB_O_1069	259	259	virb4@MYHY003c01_002590&0.752916&5.3e-67	traU	t4cp1@MYHY003c01_002590&0.572727&0.003	t4cp2	t4cp3	MOBC	MOBF	MOBH	MOBPHEN	MOBQ	MOBV	MOBT	MOBB	F_traE	F_traH	F_traK	F_traL	F_traN	F_traU	F_traV	F_traW	F_trbC	G_ICEHIN1056_000310	G_ICEHIN1056_000410	G_ICEHIN1056_000440	G_ICEHIN1056_000510	G_ICEHIN1056_000520	I_traI	I_traK	I_traL	I_traM	I_traN	I_traP	I_traQ	I_traR	I_traW	I_traY
NC_007332	Mycoplasma_hyopneumoniae_7448,_complete_genome._	Tenericutes;	Tenericutes	circular	920079	663	T4SS	NOMOB	O	T4SS_T4CP_NOMOB_O_1070	431	438	virb4@MYHY003c01_004310&0.753977&6.1e-69	traU	t4cp1@MYHY003c01_004380&0.981818&5.4e-09@MYHY003c01_004310&0.536364&0.0056	t4cp2@MYHY003c01_004380&0.972973&2.2e-38	t4cp3	MOBC	MOBF	MOBH	MOBPHEN	MOBQ	MOBV	MOBT	MOBB	F_traE	F_traH	F_traK	F_traL	F_traN	F_traU	F_traV	F_traW	F_trbC	G_ICEHIN1056_000310	G_ICEHIN1056_000410	G_ICEHIN1056_000440	G_ICEHIN1056_000510	G_ICEHIN1056_000520	I_traI	I_traK	I_traL	I_traM	I_traN	I_traP	I_traQ	I_traR	I_traW	I_traY
NC_008705	Mycobacterium_sp._KMS,_complete_genome._	Actinobacteria;	Actinobacteria	circular	5737227	5460	NOT4SS	MOB	O	NOT4SS_NOT4CP_MOB_O_1072	1450	1450	virb4	traU	t4cp1	t4cp2	t4cp3	MOBC	MOBF@MYKM001c01_014500&0.996591&3.7e-185	MOBH	MOBPHEN	MOBQ	MOBV	MOBT	MOBB	F_traE	F_traH	F_traK	F_traL	F_traN	F_traU	F_traV	F_traW	F_trbC	G_ICEHIN1056_000310	G_ICEHIN1056_000410	G_ICEHIN1056_000440	G_ICEHIN1056_000510	G_ICEHIN1056_000520	I_traI	I_traK	I_traL	I_traM	I_traN	I_traP	I_traQ	I_traR	I_traW	I_traY
NC_012803	Micrococcus_luteus_NCTC_2665,_complete_genome._	Actinobacteria;	Actinobacteria	circular	2501097	2236	NOT4SS	MOB	O	NOT4SS_T4CP_MOB_O_1074	12	36	virb4	traU	t4cp1@MYLU001c01_000120&0.981818&4e-11	t4cp2@MYLU001c01_000120&0.936937&4.6e-31	t4cp3	MOBC	MOBF@MYLU001c01_000360&0.984091&1.5e-182	MOBH	MOBPHEN	MOBQ	MOBV	MOBT	MOBB	F_traE	F_traH	F_traK	F_traL	F_traN	F_traU	F_traV	F_traW	F_trbC	G_ICEHIN1056_000310	G_ICEHIN1056_000410	G_ICEHIN1056_000440	G_ICEHIN1056_000510	G_ICEHIN1056_000520	I_traI	I_traK	I_traL	I_traM	I_traN	I_traP	I_traQ	I_traR	I_traW	I_traY
NC_010612	Mycobacterium_marinum_M,_complete_genome._	Actinobacteria;	Actinobacteria	circular	6636827	5423	NOT4SS	MOB	O	NOT4SS_NOT4CP_MOB_O_1076	3568	3568	virb4	traU	t4cp1	t4cp2	t4cp3	MOBC	MOBF@MYMA001c01_035680&0.995455&1.7e-180	MOBH	MOBPHEN	MOBQ	MOBV	MOBT	MOBB	F_traE	F_traH	F_traK	F_traL	F_traN	F_traU	F_traV	F_traW	F_trbC	G_ICEHIN1056_000310	G_ICEHIN1056_000410	G_ICEHIN1056_000440	G_ICEHIN1056_000510	G_ICEHIN1056_000520	I_traI	I_traK	I_traL	I_traM	I_traN	I_traP	I_traQ	I_traR	I_traW	I_traY
NC_008146	Mycobacterium_sp._MCS,_complete_genome._	Actinobacteria;	Actinobacteria	circular	5705448	5391	NOT4SS	MOB	O	NOT4SS_NOT4CP_MOB_O_1077	1429	1429	virb4	traU	t4cp1	t4cp2	t4cp3	MOBC	MOBF@MYMC001c01_014290&0.996591&3.7e-185	MOBH	MOBPHEN	MOBQ	MOBV	MOBT	MOBB	F_traE	F_traH	F_traK	F_traL	F_traN	F_traU	F_traV	F_traW	F_trbC	G_ICEHIN1056_000310	G_ICEHIN1056_000410	G_ICEHIN1056_000440	G_ICEHIN1056_000510	G_ICEHIN1056_000520	I_traI	I_traK	I_traL	I_traM	I_traN	I_traP	I_traQ	I_traR	I_traW	I_traY
NC_005364	Mycoplasma_mycoides_subsp._mycoides_SC_str._PG1,_complete_genome._	Tenericutes;	Tenericutes	circular	1211703	1016	T4SS	NOMOB	O	T4SS_NOT4CP_NOMOB_O_1079	189	189	virb4@MYMY001c01_001890&0.759279&7.3e-66	traU	t4cp1	t4cp2	t4cp3	MOBC	MOBF	MOBH	MOBPHEN	MOBQ	MOBV	MOBT	MOBB	F_traE	F_traH	F_traK	F_traL	F_traN	F_traU	F_traV	F_traW	F_trbC	G_ICEHIN1056_000310	G_ICEHIN1056_000410	G_ICEHIN1056_000440	G_ICEHIN1056_000510	G_ICEHIN1056_000520	I_traI	I_traK	I_traL	I_traM	I_traN	I_traP	I_traQ	I_traR	I_traW	I_traY
NC_002771	Mycoplasma_pulmonis_UAB_CTIP,_complete_genome._	Tenericutes;	Tenericutes	circular	963879	782	T4SS	NOMOB	O	T4SS_NOT4CP_NOMOB_O_1081	405	405	virb4@MYPU001c01_004050&0.734889&3.4e-66	traU	t4cp1	t4cp2	t4cp3	MOBC	MOBF	MOBH	MOBPHEN	MOBQ	MOBV	MOBT	MOBB	F_traE	F_traH	F_traK	F_traL	F_traN	F_traU	F_traV	F_traW	F_trbC	G_ICEHIN1056_000310	G_ICEHIN1056_000410	G_ICEHIN1056_000440	G_ICEHIN1056_000510	G_ICEHIN1056_000520	I_traI	I_traK	I_traL	I_traM	I_traN	I_traP	I_traQ	I_traR	I_traW	I_traY
NC_008726	Mycobacterium_vanbaalenii_PYR-1,_complete_genome._	Actinobacteria;	Actinobacteria	circular	6491865	5979	NOT4SS	MOB	O	NOT4SS_NOT4CP_MOB_O_1084	3221	3221	virb4	traU	t4cp1	t4cp2	t4cp3	MOBC	MOBF@MYVA001c01_032210&0.996591&1.5e-176	MOBH	MOBPHEN	MOBQ	MOBV	MOBT	MOBB	F_traE	F_traH	F_traK	F_traL	F_traN	F_traU	F_traV	F_traW	F_trbC	G_ICEHIN1056_000310	G_ICEHIN1056_000410	G_ICEHIN1056_000440	G_ICEHIN1056_000510	G_ICEHIN1056_000520	I_traI	I_traK	I_traL	I_traM	I_traN	I_traP	I_traQ	I_traR	I_traW	I_traY
NC_008726	Mycobacterium_vanbaalenii_PYR-1,_complete_genome._	Actinobacteria;	Actinobacteria	circular	6491865	5979	NOT4SS	MOB	O	NOT4SS_NOT4CP_MOB_O_1085	3690	3690	virb4	traU	t4cp1	t4cp2	t4cp3	MOBC	MOBF@MYVA001c01_036900&0.996591&1.5e-177	MOBH	MOBPHEN	MOBQ	MOBV	MOBT	MOBB	F_traE	F_traH	F_traK	F_traL	F_traN	F_traU	F_traV	F_traW	F_trbC	G_ICEHIN1056_000310	G_ICEHIN1056_000410	G_ICEHIN1056_000440	G_ICEHIN1056_000510	G_ICEHIN1056_000520	I_traI	I_traK	I_traL	I_traM	I_traN	I_traP	I_traQ	I_traR	I_traW	I_traY
NC_013235	Nakamurella_multipartita_DSM_44233,_complete_genome._	Actinobacteria;	Actinobacteria	circular	6060298	5240	NOT4SS	MOB	O	NOT4SS_NOT4CP_MOB_O_1090	1940	1940	virb4	traU	t4cp1	t4cp2	t4cp3	MOBC	MOBF@NAMU001c01_019400&0.988636&3e-171	MOBH	MOBPHEN	MOBQ	MOBV	MOBT	MOBB	F_traE	F_traH	F_traK	F_traL	F_traN	F_traU	F_traV	F_traW	F_trbC	G_ICEHIN1056_000310	G_ICEHIN1056_000410	G_ICEHIN1056_000440	G_ICEHIN1056_000510	G_ICEHIN1056_000520	I_traI	I_traK	I_traL	I_traM	I_traN	I_traP	I_traQ	I_traR	I_traW	I_traY
NC_011035	Neisseria_gonorrhoeae_NCCP11945,_complete_genome._	Proteobacteria;	Betaproteobacteria	circular	2232025	2662	T4SS	CONJ	F	T4SS_T4CP_MOB_F_1094	1092	1114	virb4@NEGO002c01_011020&0.80912&1.8e-120	traU	t4cp1@NEGO002c01_011140&0.954545&1.5e-11	t4cp2@NEGO002c01_011140&0.945946&8.5e-31	t4cp3	MOBC	MOBF	MOBH@NEGO002c01_011130&0.877451&5.3e-36	MOBPHEN	MOBQ	MOBV	MOBT	MOBB	F_traE@NEGO002c01_011070&0.860104&6.2e-35	F_traH@NEGO002c01_010920&0.869848&4.1e-64	F_traK@NEGO002c01_011060&0.604317&2.1e-23	F_traL@NEGO002c01_011080&0.93&4.4e-24	F_traN@NEGO002c01_010950&0.500763&1e-64	F_traU@NEGO002c01_010980&0.934132&3.5e-114	F_traV@NEGO002c01_011030&0.755102&2.7e-22	F_traW@NEGO002c01_010990&0.90566&9.1e-58	F_trbC@NEGO002c01_010970&0.593886&1.4e-40	G_ICEHIN1056_000310	G_ICEHIN1056_000410	G_ICEHIN1056_000440	G_ICEHIN1056_000510	G_ICEHIN1056_000520	I_traI	I_traK	I_traL	I_traM	I_traN	I_traP	I_traQ	I_traR	I_traW	I_traY
NC_003116	Neisseria_meningitidis_Z2491,_complete_genome._	Proteobacteria;	Betaproteobacteria	circular	2184406	1909	NOT4SS	MOB	O	NOT4SS_NOT4CP_MOB_O_1097	1437	1437	virb4	traU	t4cp1	t4cp2	t4cp3	MOBC	MOBF	MOBH	MOBPHEN@NEME001c01_014370&0.502146&0.0047	MOBQ	MOBV	MOBT	MOBB	F_traE	F_traH	F_traK	F_traL	F_traN	F_traU	F_traV	F_traW	F_trbC	G_ICEHIN1056_000310	G_ICEHIN1056_000410	G_ICEHIN1056_000440	G_ICEHIN1056_000510	G_ICEHIN1056_000520	I_traI	I_traK	I_traL	I_traM	I_traN	I_traP	I_traQ	I_traR	I_traW	I_traY
NC_003112	Neisseria_meningitidis_MC58,_complete_genome._	Proteobacteria;	Betaproteobacteria	circular	2272360	2063	NOT4SS	MOB	O	NOT4SS_NOT4CP_MOB_O_1099	1423	1423	virb4	traU	t4cp1	t4cp2	t4cp3	MOBC	MOBF	MOBH	MOBPHEN@NEME002c01_014230&0.523605&0.0047	MOBQ	MOBV	MOBT	MOBB	F_traE	F_traH	F_traK	F_traL	F_traN	F_traU	F_traV	F_traW	F_trbC	G_ICEHIN1056_000310	G_ICEHIN1056_000410	G_ICEHIN1056_000440	G_ICEHIN1056_000510	G_ICEHIN1056_000520	I_traI	I_traK	I_traL	I_traM	I_traN	I_traP	I_traQ	I_traR	I_traW	I_traY
NC_008767	Neisseria_meningitidis_FAM18,_complete_genome._	Proteobacteria;	Betaproteobacteria	circular	2194961	1917	NOT4SS	MOB	O	NOT4SS_NOT4CP_MOB_O_1100	1263	1263	virb4	traU	t4cp1	t4cp2	t4cp3	MOBC	MOBF	MOBH	MOBPHEN@NEME003c01_012630&0.502146&0.0053	MOBQ	MOBV	MOBT	MOBB	F_traE	F_traH	F_traK	F_traL	F_traN	F_traU	F_traV	F_traW	F_trbC	G_ICEHIN1056_000310	G_ICEHIN1056_000410	G_ICEHIN1056_000440	G_ICEHIN1056_000510	G_ICEHIN1056_000520	I_traI	I_traK	I_traL	I_traM	I_traN	I_traP	I_traQ	I_traR	I_traW	I_traY
NC_010120	Neisseria_meningitidis_053442,_complete_genome._	Proteobacteria;	Betaproteobacteria	circular	2153416	2020	NOT4SS	MOB	O	NOT4SS_NOT4CP_MOB_O_1102	1332	1332	virb4	traU	t4cp1	t4cp2	t4cp3	MOBC	MOBF	MOBH	MOBPHEN@NEME005c01_013320&0.502146&0.0051	MOBQ	MOBV	MOBT	MOBB	F_traE	F_traH	F_traK	F_traL	F_traN	F_traU	F_traV	F_traW	F_trbC	G_ICEHIN1056_000310	G_ICEHIN1056_000410	G_ICEHIN1056_000440	G_ICEHIN1056_000510	G_ICEHIN1056_000520	I_traI	I_traK	I_traL	I_traM	I_traN	I_traP	I_traQ	I_traR	I_traW	I_traY
NC_013009	Neorickettsia_risticii_str._Illinois,_complete_genome._	Proteobacteria;	Alphaproteobacteria	circular	879977	892	T4SS	NOMOB	T	T4SS_T4CP_NOMOB_O_1105_O_1104	712	830	virb4@NERI001c01_008290&0.814422&1.4e-205@NERI001c01_007360&0.7614&5.5e-36	traU	t4cp1@NERI001c01_007120&0.990909&4.3e-27	t4cp2@NERI001c01_007120&1&6.2e-51	t4cp3	MOBC	MOBF	MOBH	MOBPHEN	MOBQ	MOBV	MOBT	MOBB	F_traE	F_traH	F_traK	F_traL	F_traN	F_traU	F_traV	F_traW	F_trbC	G_ICEHIN1056_000310	G_ICEHIN1056_000410	G_ICEHIN1056_000440	G_ICEHIN1056_000510	G_ICEHIN1056_000520	I_traI	I_traK	I_traL	I_traM	I_traN	I_traP	I_traQ	I_traR	I_traW	I_traY
NC_007798	Neorickettsia_sennetsu_str._Miyayama,_complete_genome._	Proteobacteria;	Alphaproteobacteria	circular	859006	932	T4SS	NOMOB	T	T4SS_T4CP_NOMOB_O_1108_O_1107	738	862	virb4@NESE001c01_008610&0.815483&1e-206@NESE001c01_007650&0.805938&1.8e-34	traU	t4cp1@NESE001c01_007380&0.990909&6.2e-27	t4cp2@NESE001c01_007380&1&5.9e-51	t4cp3	MOBC	MOBF	MOBH	MOBPHEN	MOBQ	MOBV	MOBT	MOBB	F_traE	F_traH	F_traK	F_traL	F_traN	F_traU	F_traV	F_traW	F_trbC	G_ICEHIN1056_000310	G_ICEHIN1056_000410	G_ICEHIN1056_000440	G_ICEHIN1056_000510	G_ICEHIN1056_000520	I_traI	I_traK	I_traL	I_traM	I_traN	I_traP	I_traQ	I_traR	I_traW	I_traY
NC_008344	Nitrosomonas_eutropha_C91,_complete_genome._	Proteobacteria;	Betaproteobacteria	circular	2661057	2444	T4SS	CONJ	G	T4SS_T4CP_MOB_G_1111	65	99	virb4@NIEU002c01_000820&0.812301&5e-94	traU	t4cp1@NIEU002c01_000940&0.990909&1.9e-10	t4cp2@NIEU002c01_000940&0.972973&4.9e-33	t4cp3	MOBC	MOBF	MOBH@NIEU002c01_000650&0.877451&3.4e-43	MOBPHEN	MOBQ	MOBV	MOBT	MOBB	F_traE@NIEU002c01_000860&0.554404&2.8e-05	F_traH	F_traK	F_traL	F_traN	F_traU	F_traV	F_traW	F_trbC	G_ICEHIN1056_000310@NIEU002c01_000990&0.905941&2.7e-65	G_ICEHIN1056_000410@NIEU002c01_000860&0.959276&3.4e-107	G_ICEHIN1056_000440@NIEU002c01_000830&0.978261&5.3e-63	G_ICEHIN1056_000510@NIEU002c01_000710&0.973742&1.2e-201	G_ICEHIN1056_000520@NIEU002c01_000720&0.969789&4.5e-146	I_traI	I_traK	I_traL	I_traM	I_traN	I_traP	I_traQ	I_traR	I_traW	I_traY
NC_007964	Nitrobacter_hamburgensis_X14,_complete_genome._	Proteobacteria;	Alphaproteobacteria	circular	4406967	3804	NOT4SS	MOB	O	NOT4SS_NOT4CP_MOB_O_1115	136	136	virb4	traU	t4cp1	t4cp2	t4cp3	MOBC	MOBF	MOBH	MOBPHEN@NIHA001c01_001360&0.957082&1e-12	MOBQ	MOBV	MOBT	MOBB	F_traE	F_traH	F_traK	F_traL	F_traN	F_traU	F_traV	F_traW	F_trbC	G_ICEHIN1056_000310	G_ICEHIN1056_000410	G_ICEHIN1056_000440	G_ICEHIN1056_000510	G_ICEHIN1056_000520	I_traI	I_traK	I_traL	I_traM	I_traN	I_traP	I_traQ	I_traR	I_traW	I_traY
NC_007964	Nitrobacter_hamburgensis_X14,_complete_genome._	Proteobacteria;	Alphaproteobacteria	circular	4406967	3804	NOT4SS	MOB	O	NOT4SS_T4CP_MOB_O_1118	589	592	virb4	traU	t4cp1@NIHA001c01_005890&0.990909&1.3e-14	t4cp2@NIHA001c01_005890&0.995495&1.7e-37	t4cp3	MOBC	MOBF	MOBH	MOBPHEN@NIHA001c01_005920&0.974249&4.1e-19	MOBQ	MOBV	MOBT	MOBB	F_traE	F_traH	F_traK	F_traL	F_traN	F_traU	F_traV	F_traW	F_trbC	G_ICEHIN1056_000310	G_ICEHIN1056_000410	G_ICEHIN1056_000440	G_ICEHIN1056_000510	G_ICEHIN1056_000520	I_traI	I_traK	I_traL	I_traM	I_traN	I_traP	I_traQ	I_traR	I_traW	I_traY
NC_007484	Nitrosococcus_oceani_ATCC_19707,_complete_genome._	Proteobacteria;	Gammaproteobacteria	circular	3481691	2974	T4SS	NOMOB	G	T4SS_T4CP_NOMOB_G_1124	598	622	virb4@NIOC001c01_006180&0.817603&5.3e-90	traU	t4cp1@NIOC001c01_006020&0.972727&1.5e-14	t4cp2@NIOC001c01_006020&0.977477&1.1e-25	t4cp3	MOBC	MOBF	MOBH	MOBPHEN	MOBQ	MOBV	MOBT	MOBB	F_traE	F_traH	F_traK	F_traL	F_traN	F_traU	F_traV	F_traW	F_trbC	G_ICEHIN1056_000310@NIOC001c01_005980&0.752475&5.6e-39	G_ICEHIN1056_000410@NIOC001c01_006140&0.959276&1e-88	G_ICEHIN1056_000440@NIOC001c01_006170&0.869565&8.4e-46	G_ICEHIN1056_000510@NIOC001c01_006220&0.954048&1.1e-137	G_ICEHIN1056_000520@NIOC001c01_006210&0.97281&2.3e-123	I_traI	I_traK	I_traL	I_traM	I_traN	I_traP	I_traQ	I_traR	I_traW	I_traY
NC_009662	Nitratiruptor_sp._SB155-2,_complete_genome._	Proteobacteria;	Epsilonproteobacteria	circular	1877931	1843	NOT4SS	MOB	O	NOT4SS_T4CP_MOB_O_1126	1722	1723	virb4	traU	t4cp1@NISP001c01_017220&0.981818&3.9e-06	t4cp2@NISP001c01_017220&0.72973&1.8e-09	t4cp3	MOBC	MOBF@NISP001c01_017230&0.998864&1.1e-163	MOBH	MOBPHEN	MOBQ	MOBV	MOBT	MOBB	F_traE	F_traH	F_traK	F_traL	F_traN	F_traU	F_traV	F_traW	F_trbC	G_ICEHIN1056_000310	G_ICEHIN1056_000410	G_ICEHIN1056_000440	G_ICEHIN1056_000510	G_ICEHIN1056_000520	I_traI	I_traK	I_traL	I_traM	I_traN	I_traP	I_traQ	I_traR	I_traW	I_traY
NC_007406	Nitrobacter_winogradskyi_Nb-255,_complete_genome._	Proteobacteria;	Alphaproteobacteria	circular	3402093	3122	NOT4SS	MOB	O	NOT4SS_T4CP_MOB_O_1128	709	746	virb4	traU	t4cp1	t4cp2@NIWI001c01_007460&0.923423&4.5e-20	t4cp3	MOBC	MOBF	MOBH	MOBPHEN@NIWI001c01_007440&0.974249&1.4e-19	MOBQ	MOBV	MOBT	MOBB	F_traE	F_traH	F_traK	F_traL	F_traN	F_traU	F_traV	F_traW	F_trbC	G_ICEHIN1056_000310	G_ICEHIN1056_000410	G_ICEHIN1056_000440	G_ICEHIN1056_000510	G_ICEHIN1056_000520	I_traI	I_traK	I_traL	I_traM	I_traN	I_traP@NIWI001c01_007090&0.506276&0.00021	I_traQ	I_traR	I_traW	I_traY
NC_007406	Nitrobacter_winogradskyi_Nb-255,_complete_genome._	Proteobacteria;	Alphaproteobacteria	circular	3402093	3122	NOT4SS	MOB	O	NOT4SS_NOT4CP_MOB_O_1129	870	870	virb4	traU	t4cp1	t4cp2	t4cp3	MOBC	MOBF	MOBH	MOBPHEN@NIWI001c01_008700&0.690987&5.1e-24	MOBQ	MOBV	MOBT	MOBB	F_traE	F_traH	F_traK	F_traL	F_traN	F_traU	F_traV	F_traW	F_trbC	G_ICEHIN1056_000310	G_ICEHIN1056_000410	G_ICEHIN1056_000440	G_ICEHIN1056_000510	G_ICEHIN1056_000520	I_traI	I_traK	I_traL	I_traM	I_traN	I_traP	I_traQ	I_traR	I_traW	I_traY
NC_007406	Nitrobacter_winogradskyi_Nb-255,_complete_genome._	Proteobacteria;	Alphaproteobacteria	circular	3402093	3122	NOT4SS	MOB	O	NOT4SS_NOT4CP_MOB_O_1133	2881	2881	virb4	traU	t4cp1	t4cp2	t4cp3	MOBC	MOBF	MOBH	MOBPHEN@NIWI001c01_028810&0.772532&4.8e-22	MOBQ	MOBV	MOBT	MOBB	F_traE	F_traH	F_traK	F_traL	F_traN	F_traU	F_traV	F_traW	F_trbC	G_ICEHIN1056_000310	G_ICEHIN1056_000410	G_ICEHIN1056_000440	G_ICEHIN1056_000510	G_ICEHIN1056_000520	I_traI	I_traK	I_traL	I_traM	I_traN	I_traP	I_traQ	I_traR	I_traW	I_traY
NC_007794	Novosphingobium_aromaticivorans_DSM_12444,_complete_genome._	Proteobacteria;	Alphaproteobacteria	circular	3561584	3324	T4SS	CONJ	T	T4SS_T4CP_MOB_T_1134	313	362	virb4@NOAR001c01_003180&0.821845&5.6e-176	traU	t4cp1@NOAR001c01_003230&1&2.6e-23	t4cp2@NOAR001c01_003230&1&8.4e-56	t4cp3	MOBC	MOBF	MOBH	MOBPHEN@NOAR001c01_003620&0.83691&5.2e-23	MOBQ	MOBV	MOBT	MOBB	F_traE	F_traH	F_traK	F_traL	F_traN	F_traU	F_traV	F_traW	F_trbC	G_ICEHIN1056_000310	G_ICEHIN1056_000410	G_ICEHIN1056_000440	G_ICEHIN1056_000510	G_ICEHIN1056_000520	I_traI	I_traK	I_traL	I_traM	I_traN	I_traP	I_traQ	I_traR	I_traW	I_traY
NC_007794	Novosphingobium_aromaticivorans_DSM_12444,_complete_genome._	Proteobacteria;	Alphaproteobacteria	circular	3561584	3324	T4SS	CONJ	F	T4SS_T4CP_MOB_F_1136	2180	2208	virb4@NOAR001c01_021860&0.797455&1.5e-125	traU	t4cp1@NOAR001c01_022080&0.981818&6.5e-12	t4cp2@NOAR001c01_022080&0.869369&3.6e-34	t4cp3	MOBC	MOBF@NOAR001c01_022070&0.570455&2.8e-126	MOBH	MOBPHEN	MOBQ	MOBV	MOBT	MOBB	F_traE@NOAR001c01_021810&0.984456&2.1e-34	F_traH@NOAR001c01_021920&0.969631&7.8e-114	F_traK@NOAR001c01_021820&0.892086&6.2e-41	F_traL@NOAR001c01_021800&0.91&2.1e-30	F_traN	F_traU	F_traV@NOAR001c01_021850&0.64898&0.0016&2.9e-06	F_traW@NOAR001c01_021900&0.95283&3.4e-71	F_trbC	G_ICEHIN1056_000310	G_ICEHIN1056_000410	G_ICEHIN1056_000440	G_ICEHIN1056_000510	G_ICEHIN1056_000520	I_traI	I_traK	I_traL	I_traM	I_traN	I_traP	I_traQ	I_traR	I_traW	I_traY
NC_008699	Nocardioides_sp._JS614,_complete_genome._	Actinobacteria;	Actinobacteria	circular	4985871	4645	NOT4SS	MOB	O	NOT4SS_NOT4CP_MOB_O_1138	1086	1086	virb4	traU	t4cp1	t4cp2	t4cp3	MOBC	MOBF@NOCA001c01_010860&0.907955&7.3e-92&9.3e-25	MOBH	MOBPHEN	MOBQ	MOBV	MOBT	MOBB	F_traE	F_traH	F_traK	F_traL	F_traN	F_traU	F_traV	F_traW	F_trbC	G_ICEHIN1056_000310	G_ICEHIN1056_000410	G_ICEHIN1056_000440	G_ICEHIN1056_000510	G_ICEHIN1056_000520	I_traI	I_traK	I_traL	I_traM	I_traN	I_traP	I_traQ	I_traR	I_traW	I_traY
NC_008699	Nocardioides_sp._JS614,_complete_genome._	Actinobacteria;	Actinobacteria	circular	4985871	4645	NOT4SS	MOB	O	NOT4SS_T4CP_MOB_O_1139	1563	1567	virb4	traU	t4cp1@NOCA001c01_015630&0.981818&1.2e-09	t4cp2@NOCA001c01_015630&0.972973&6e-33	t4cp3	MOBC	MOBF@NOCA001c01_015670&0.994318&6.1e-197	MOBH	MOBPHEN	MOBQ	MOBV	MOBT	MOBB	F_traE	F_traH	F_traK	F_traL	F_traN	F_traU	F_traV	F_traW	F_trbC	G_ICEHIN1056_000310	G_ICEHIN1056_000410	G_ICEHIN1056_000440	G_ICEHIN1056_000510	G_ICEHIN1056_000520	I_traI	I_traK	I_traL	I_traM	I_traN	I_traP	I_traQ	I_traR	I_traW	I_traY
NC_008699	Nocardioides_sp._JS614,_complete_genome._	Actinobacteria;	Actinobacteria	circular	4985871	4645	NOT4SS	MOB	O	NOT4SS_NOT4CP_MOB_O_1140	1708	1708	virb4	traU	t4cp1	t4cp2	t4cp3	MOBC	MOBF@NOCA001c01_017080&0.909091&1e-91&4.4e-26	MOBH	MOBPHEN	MOBQ	MOBV	MOBT	MOBB	F_traE	F_traH	F_traK	F_traL	F_traN	F_traU	F_traV	F_traW	F_trbC	G_ICEHIN1056_000310	G_ICEHIN1056_000410	G_ICEHIN1056_000440	G_ICEHIN1056_000510	G_ICEHIN1056_000520	I_traI	I_traK	I_traL	I_traM	I_traN	I_traP	I_traQ	I_traR	I_traW	I_traY
NC_008699	Nocardioides_sp._JS614,_complete_genome._	Actinobacteria;	Actinobacteria	circular	4985871	4645	NOT4SS	MOB	O	NOT4SS_T4CP_MOB_O_1141	2228	2237	virb4	traU	t4cp1@NOCA001c01_022330&0.981818&7.2e-05	t4cp2@NOCA001c01_022330&0.963964&9.1e-29	t4cp3	MOBC	MOBF@NOCA001c01_022370&0.995455&8.9e-201	MOBH	MOBPHEN	MOBQ	MOBV	MOBT	MOBB	F_traE	F_traH	F_traK	F_traL	F_traN	F_traU	F_traV	F_traW	F_trbC	G_ICEHIN1056_000310	G_ICEHIN1056_000410	G_ICEHIN1056_000440	G_ICEHIN1056_000510	G_ICEHIN1056_000520	I_traI	I_traK	I_traL	I_traM	I_traN	I_traP	I_traQ	I_traR	I_traW	I_traY
NC_010628	Nostoc_punctiforme_PCC_73102,_complete_genome._	Cyanobacteria;	Cyanobacteria	circular	8234322	6087	NOT4SS	MOB	O	NOT4SS_T4CP_MOB_O_1144	3010	3027	virb4	traU	t4cp1@NOPU001c01_030100&0.990909&7.3e-20	t4cp2@NOPU001c01_030100&0.864865&1.5e-41	t4cp3	MOBC	MOBF	MOBH	MOBPHEN	MOBQ	MOBV@NOPU001c01_030270&0.980392&2e-45	MOBT	MOBB	F_traE	F_traH	F_traK	F_traL	F_traN	F_traU	F_traV	F_traW	F_trbC	G_ICEHIN1056_000310	G_ICEHIN1056_000410	G_ICEHIN1056_000440	G_ICEHIN1056_000510	G_ICEHIN1056_000520	I_traI	I_traK	I_traL	I_traM	I_traN	I_traP	I_traQ	I_traR	I_traW	I_traY
NC_010628	Nostoc_punctiforme_PCC_73102,_complete_genome._	Cyanobacteria;	Cyanobacteria	circular	8234322	6087	T4SS	NOMOB	O	T4SS_NOT4CP_NOMOB_O_1145	3887	3887	virb4@NOPU001c01_038870&0.704136&3.6e-40	traU	t4cp1	t4cp2	t4cp3	MOBC	MOBF	MOBH	MOBPHEN	MOBQ	MOBV	MOBT	MOBB	F_traE	F_traH	F_traK	F_traL	F_traN	F_traU	F_traV	F_traW	F_trbC	G_ICEHIN1056_000310	G_ICEHIN1056_000410	G_ICEHIN1056_000440	G_ICEHIN1056_000510	G_ICEHIN1056_000520	I_traI	I_traK	I_traL	I_traM	I_traN	I_traP	I_traQ	I_traR	I_traW	I_traY
NC_003272	Nostoc_sp._PCC_7120,_complete_genome._	Cyanobacteria;	Cyanobacteria	circular	6413771	5366	T4SS	NOMOB	O	T4SS_NOT4CP_NOMOB_O_1146	473	473	virb4@NOSP001c01_004730&0.7614&4e-39	traU	t4cp1	t4cp2	t4cp3	MOBC	MOBF	MOBH	MOBPHEN	MOBQ	MOBV	MOBT	MOBB	F_traE	F_traH	F_traK	F_traL	F_traN	F_traU	F_traV	F_traW	F_trbC	G_ICEHIN1056_000310	G_ICEHIN1056_000410	G_ICEHIN1056_000440	G_ICEHIN1056_000510	G_ICEHIN1056_000520	I_traI	I_traK	I_traL	I_traM	I_traN	I_traP	I_traQ	I_traR	I_traW	I_traY
NC_009667	Ochrobactrum_anthropi_ATCC_49188_chromosome_1,_complete_sequence._	Proteobacteria;	Alphaproteobacteria	circular	2887297	2731	T4SS	CONJ	T	T4SS_T4CP_MOB_T_1147	648	681	virb4@OCAN001c01_006750&0.813362&5.3e-228	traU	t4cp1@OCAN001c01_006480&0.990909&6.2e-20	t4cp2@OCAN001c01_006480&1&1.5e-48	t4cp3	MOBC	MOBF@OCAN001c01_006510&0.714773&6e-75	MOBH	MOBPHEN	MOBQ@OCAN001c01_006510&1&2.1e-75	MOBV	MOBT	MOBB	F_traE	F_traH	F_traK	F_traL	F_traN	F_traU	F_traV	F_traW	F_trbC	G_ICEHIN1056_000310	G_ICEHIN1056_000410	G_ICEHIN1056_000440	G_ICEHIN1056_000510	G_ICEHIN1056_000520	I_traI	I_traK	I_traL	I_traM	I_traN	I_traP	I_traQ	I_traR	I_traW	I_traY
NC_009668	Ochrobactrum_anthropi_ATCC_49188_chromosome_2,_complete_sequence._	Proteobacteria;	Alphaproteobacteria	circular	1895911	1693	T4SS	CONJ	T	T4SS_T4CP_MOB_T_1148	445	473	virb4@OCAN001c02_004680&0.848356&9.4e-177	traU	t4cp1@OCAN001c02_004460&1&2.6e-25	t4cp2@OCAN001c02_004460&1&5.6e-56	t4cp3	MOBC	MOBF	MOBH	MOBPHEN@OCAN001c02_004450&0.879828&1.3e-29	MOBQ	MOBV	MOBT	MOBB	F_traE	F_traH	F_traK	F_traL	F_traN	F_traU	F_traV	F_traW	F_trbC	G_ICEHIN1056_000310	G_ICEHIN1056_000410	G_ICEHIN1056_000440	G_ICEHIN1056_000510	G_ICEHIN1056_000520	I_traI	I_traK	I_traL	I_traM	I_traN	I_traP	I_traQ	I_traR	I_traW	I_traY
NC_011386	Oligotropha_carboxidovorans_OM5,_complete_genome._	Proteobacteria;	Alphaproteobacteria	circular	3745629	3722	NOT4SS	MOB	O	NOT4SS_NOT4CP_MOB_O_1149	1	1	virb4	traU	t4cp1	t4cp2	t4cp3	MOBC	MOBF	MOBH	MOBPHEN@OLCA001c01_000010&0.660944&6.6e-22	MOBQ	MOBV	MOBT	MOBB	F_traE	F_traH	F_traK	F_traL	F_traN	F_traU	F_traV	F_traW	F_trbC	G_ICEHIN1056_000310	G_ICEHIN1056_000410	G_ICEHIN1056_000440	G_ICEHIN1056_000510	G_ICEHIN1056_000520	I_traI	I_traK	I_traL	I_traM	I_traN	I_traP	I_traQ	I_traR	I_traW	I_traY
NC_011386	Oligotropha_carboxidovorans_OM5,_complete_genome._	Proteobacteria;	Alphaproteobacteria	circular	3745629	3722	T4SS	CONJ	T	T4SS_T4CP_MOB_T_1150	184	196	virb4@OLCA001c01_001890&0.829268&1.8e-172	traU	t4cp1@OLCA001c01_001950&1&3.6e-25	t4cp2@OLCA001c01_001950&1&2.1e-55	t4cp3	MOBC	MOBF	MOBH	MOBPHEN@OLCA001c01_001960&0.858369&1.1e-29	MOBQ	MOBV	MOBT	MOBB	F_traE	F_traH	F_traK	F_traL	F_traN	F_traU	F_traV	F_traW	F_trbC	G_ICEHIN1056_000310	G_ICEHIN1056_000410	G_ICEHIN1056_000440	G_ICEHIN1056_000510	G_ICEHIN1056_000520	I_traI	I_traK	I_traL	I_traM	I_traN	I_traP	I_traQ	I_traR	I_traW	I_traY
NC_011386	Oligotropha_carboxidovorans_OM5,_complete_genome._	Proteobacteria;	Alphaproteobacteria	circular	3745629	3722	T4SS	CONJ	T	T4SS_T4CP_MOB_T_1152	2424	2444	virb4@OLCA001c01_024280&0.80912&1.6e-169	traU	t4cp1@OLCA001c01_024420&1&6.3e-24	t4cp2@OLCA001c01_024420&1&8.5e-54	t4cp3	MOBC	MOBF	MOBH	MOBPHEN@OLCA001c01_024440&0.862661&2.3e-29	MOBQ	MOBV	MOBT	MOBB	F_traE	F_traH	F_traK	F_traL	F_traN	F_traU	F_traV	F_traW	F_trbC	G_ICEHIN1056_000310	G_ICEHIN1056_000410	G_ICEHIN1056_000440	G_ICEHIN1056_000510	G_ICEHIN1056_000520	I_traI	I_traK	I_traL	I_traM	I_traN	I_traP	I_traQ	I_traR	I_traW	I_traY
NC_011386	Oligotropha_carboxidovorans_OM5,_complete_genome._	Proteobacteria;	Alphaproteobacteria	circular	3745629	3722	T4SS	CONJ	T	T4SS_T4CP_MOB_T_1154A	3596	3634	virb4@OLCA001c01_036010&0.819724&1e-177	traU	t4cp1@OLCA001c01_036060&1&1.1e-25	t4cp2@OLCA001c01_036060&1&4.5e-55	t4cp3	MOBC	MOBF	MOBH	MOBPHEN@OLCA001c01_036340&0.506438&3e-12	MOBQ	MOBV	MOBT	MOBB	F_traE	F_traH	F_traK	F_traL	F_traN	F_traU	F_traV	F_traW	F_trbC	G_ICEHIN1056_000310	G_ICEHIN1056_000410	G_ICEHIN1056_000440	G_ICEHIN1056_000510	G_ICEHIN1056_000520	I_traI	I_traK	I_traL	I_traM	I_traN	I_traP	I_traQ	I_traR	I_traW	I_traY
NC_011386	Oligotropha_carboxidovorans_OM5,_complete_genome._	Proteobacteria;	Alphaproteobacteria	circular	3745629	3722	T4SS	NOMOB	T	T4SS_T4CP_NOMOB_T_1154B	3688	3699	virb4@OLCA001c01_036890&0.814422&2.3e-212	traU	t4cp1@OLCA001c01_036990&0.990909&1.7e-25	t4cp2@OLCA001c01_036990&0.977477&8.4e-40	t4cp3	MOBC	MOBF	MOBH	MOBPHEN	MOBQ	MOBV	MOBT	MOBB	F_traE	F_traH	F_traK	F_traL	F_traN	F_traU	F_traV	F_traW	F_trbC	G_ICEHIN1056_000310	G_ICEHIN1056_000410	G_ICEHIN1056_000440	G_ICEHIN1056_000510	G_ICEHIN1056_000520	I_traI	I_traK	I_traL	I_traM	I_traN	I_traP	I_traQ	I_traR	I_traW	I_traY
NC_010571	Opitutus_terrae_PB90-1,_complete_genome._	Verrucomicrobia;	Verrucomicrobia	circular	5957605	4612	T4SS	CONJ	O	T4SS_T4CP_MOB_O_1156	1216	1221	virb4@OPTE001c01_012210&0.764581&1.5e-47	traU	t4cp1	t4cp2@OPTE001c01_012160&0.918919&1.2e-10	t4cp3	MOBC	MOBF@OPTE001c01_012170&0.997727&3.6e-143	MOBH	MOBPHEN	MOBQ	MOBV	MOBT	MOBB	F_traE	F_traH	F_traK	F_traL	F_traN	F_traU	F_traV	F_traW	F_trbC	G_ICEHIN1056_000310	G_ICEHIN1056_000410	G_ICEHIN1056_000440	G_ICEHIN1056_000510	G_ICEHIN1056_000520	I_traI	I_traK	I_traL	I_traM	I_traN	I_traP	I_traQ	I_traR	I_traW	I_traY
NC_010571	Opitutus_terrae_PB90-1,_complete_genome._	Verrucomicrobia;	Verrucomicrobia	circular	5957605	4612	NOT4SS	MOB	O	NOT4SS_NOT4CP_MOB_O_1157	1972	1972	virb4	traU	t4cp1	t4cp2	t4cp3	MOBC	MOBF@OPTE001c01_019720&0.982955&7.1e-154	MOBH	MOBPHEN	MOBQ	MOBV	MOBT	MOBB	F_traE	F_traH	F_traK	F_traL	F_traN	F_traU	F_traV	F_traW	F_trbC	G_ICEHIN1056_000310	G_ICEHIN1056_000410	G_ICEHIN1056_000440	G_ICEHIN1056_000510	G_ICEHIN1056_000520	I_traI	I_traK	I_traL	I_traM	I_traN	I_traP	I_traQ	I_traR	I_traW	I_traY
NC_010571	Opitutus_terrae_PB90-1,_complete_genome._	Verrucomicrobia;	Verrucomicrobia	circular	5957605	4612	T4SS	CONJ	O	T4SS_T4CP_MOB_O_1158	4526	4536	virb4@OPTE001c01_045310&0.751856&4.2e-47	traU	t4cp1	t4cp2@OPTE001c01_045260&0.918919&1.5e-13	t4cp3	MOBC	MOBF@OPTE001c01_045270&0.994318&1.7e-142	MOBH	MOBPHEN	MOBQ	MOBV	MOBT	MOBB	F_traE	F_traH	F_traK	F_traL	F_traN	F_traU	F_traV	F_traW	F_trbC	G_ICEHIN1056_000310	G_ICEHIN1056_000410	G_ICEHIN1056_000440	G_ICEHIN1056_000510	G_ICEHIN1056_000520	I_traI	I_traK	I_traL	I_traM	I_traN	I_traP	I_traQ	I_traR	I_traW	I_traY
NC_010793	Orientia_tsutsugamushi_str._Ikeda,_complete_genome._	Proteobacteria;	Alphaproteobacteria	circular	2008987	1967	T4SS	CONJ	F	T4SS_T4CP_MOB_F_1159	2	230	virb4@ORTS001c01_002280&0.555673&2.5e-48@ORTS001c01_002180&0.555673&1.3e-48@ORTS001c01_001020&0.661718&1.1e-74@ORTS001c01_000020&0.812301&4.8e-76	traU	t4cp1@ORTS001c01_000540&0.963636&3.9e-07	t4cp2@ORTS001c01_001170&0.887387&2.4e-42@ORTS001c01_000540&0.887387&2.6e-42	t4cp3	MOBC	MOBF@ORTS001c01_001920&0.514773&4.7e-60&1.4e-18	MOBH	MOBPHEN	MOBQ@ORTS001c01_001920&0.617512&1.3e-19@ORTS001c01_001800&0.940092&3e-34	MOBV@ORTS001c01_001800&0.583333&5.9e-05	MOBT	MOBB	F_traE@ORTS001c01_002240&0.943005&1.4e-21	F_traH@ORTS001c01_002020&0.633406&6.6e-64@ORTS001c01_000550&0.633406&6.6e-64	F_traK	F_traL@ORTS001c01_002250&0.54&0.00032@ORTS001c01_001970&0.54&0.00019@ORTS001c01_000600&0.54&0.00019	F_traN	F_traU@ORTS001c01_002300&0.577844&4.5e-73@ORTS001c01_002160&0.685629&1.6e-82@ORTS001c01_001380&0.931138&2.5e-112@ORTS001c01_001060&0.97006&1.3e-116	F_traV	F_traW@ORTS001c01_001390&0.938679&6.3e-57@ORTS001c01_001040&0.886792&1.3e-56	F_trbC@ORTS001c01_002150&0.502183&1.5e-26	G_ICEHIN1056_000310	G_ICEHIN1056_000410	G_ICEHIN1056_000440	G_ICEHIN1056_000510	G_ICEHIN1056_000520	I_traI	I_traK	I_traL	I_traM	I_traN	I_traP	I_traQ	I_traR	I_traW	I_traY
NC_010793	Orientia_tsutsugamushi_str._Ikeda,_complete_genome._	Proteobacteria;	Alphaproteobacteria	circular	2008987	1967	T4SS	CONJ	F	T4SS_T4CP_MOB_F_1160	314	559	virb4@ORTS001c01_004940&0.555673&1.3e-48	traU	t4cp1@ORTS001c01_004070&0.963636&2.2e-06	t4cp2@ORTS001c01_004070&0.887387&1.6e-41	t4cp3	MOBC	MOBF	MOBH	MOBPHEN	MOBQ@ORTS001c01_005590&0.940092&4.7e-34@ORTS001c01_004010&0.940092&4.9e-34@ORTS001c01_003610&0.940092&4.9e-34@ORTS001c01_003390&0.940092&1.1e-35	MOBV@ORTS001c01_005590&0.573529&8.4e-05@ORTS001c01_004010&0.573529&8.6e-05@ORTS001c01_003610&0.573529&8.6e-05	MOBT	MOBB	F_traE@ORTS001c01_004240&0.699482&9.3e-18	F_traH@ORTS001c01_005010&0.926247&1.1e-78@ORTS001c01_004120&0.926247&1.1e-78	F_traK	F_traL@ORTS001c01_004250&0.55&0.0003@ORTS001c01_003140&0.54&0.00021	F_traN	F_traU@ORTS001c01_004960&0.685629&1.6e-82@ORTS001c01_004630&0.580838&2.1e-66@ORTS001c01_004170&0.685629&1.6e-82	F_traV	F_traW	F_trbC@ORTS001c01_004970&0.502183&1.5e-26@ORTS001c01_004160&0.502183&1.5e-26	G_ICEHIN1056_000310	G_ICEHIN1056_000410	G_ICEHIN1056_000440	G_ICEHIN1056_000510	G_ICEHIN1056_000520	I_traI	I_traK	I_traL	I_traM	I_traN	I_traP	I_traQ	I_traR	I_traW	I_traY
NC_010793	Orientia_tsutsugamushi_str._Ikeda,_complete_genome._	Proteobacteria;	Alphaproteobacteria	circular	2008987	1967	T4SS	CONJ	O	T4SS_T4CP_MOB_O_1161	658	782	virb4@ORTS001c01_007790&0.816543&1.8e-202@ORTS001c01_007120&0.661718&1.1e-74	traU	t4cp1	t4cp2@ORTS001c01_006580&0.513514&4.5e-05	t4cp3	MOBC	MOBF	MOBH	MOBPHEN	MOBQ@ORTS001c01_006710&0.940092&1.2e-33	MOBV@ORTS001c01_006710&0.573529&0.00018	MOBT	MOBB	F_traE	F_traH	F_traK	F_traL	F_traN	F_traU@ORTS001c01_007630&0.613772&7.3e-75@ORTS001c01_007080&0.97006&1.3e-116	F_traV	F_traW@ORTS001c01_007100&0.886792&1.3e-56	F_trbC	G_ICEHIN1056_000310	G_ICEHIN1056_000410	G_ICEHIN1056_000440	G_ICEHIN1056_000510	G_ICEHIN1056_000520	I_traI	I_traK	I_traL	I_traM	I_traN	I_traP	I_traQ	I_traR	I_traW	I_traY
NC_010793	Orientia_tsutsugamushi_str._Ikeda,_complete_genome._	Proteobacteria;	Alphaproteobacteria	circular	2008987	1967	NOT4SS	MOB	O	NOT4SS_T4CP_MOB_O_1162	886	894	virb4	traU	t4cp1@ORTS001c01_008860&0.972727&1.9e-07	t4cp2@ORTS001c01_008860&0.887387&2.2e-41	t4cp3	MOBC	MOBF	MOBH	MOBPHEN	MOBQ@ORTS001c01_008940&0.940092&7e-37	MOBV	MOBT	MOBB	F_traE	F_traH	F_traK	F_traL	F_traN	F_traU	F_traV	F_traW	F_trbC	G_ICEHIN1056_000310	G_ICEHIN1056_000410	G_ICEHIN1056_000440	G_ICEHIN1056_000510	G_ICEHIN1056_000520	I_traI	I_traK	I_traL	I_traM	I_traN	I_traP	I_traQ	I_traR	I_traW	I_traY
NC_010793	Orientia_tsutsugamushi_str._Ikeda,_complete_genome._	Proteobacteria;	Alphaproteobacteria	circular	2008987	1967	NOT4SS	MOB	O	NOT4SS_NOT4CP_MOB_O_1163	956	1033	virb4	traU	t4cp1	t4cp2	t4cp3	MOBC	MOBF@ORTS001c01_010140&0.515909&3.3e-60&1.3e-18	MOBH	MOBPHEN	MOBQ@ORTS001c01_010330&0.940092&6.8e-37@ORTS001c01_010140&0.700461&3.5e-23	MOBV	MOBT	MOBB	F_traE@ORTS001c01_010260&0.668394&1.2e-15@ORTS001c01_009560&0.943005&3.9e-22	F_traH	F_traK	F_traL@ORTS001c01_010250&0.54&0.00029	F_traN	F_traU	F_traV	F_traW	F_trbC	G_ICEHIN1056_000310	G_ICEHIN1056_000410	G_ICEHIN1056_000440	G_ICEHIN1056_000510	G_ICEHIN1056_000520	I_traI	I_traK	I_traL	I_traM	I_traN	I_traP	I_traQ	I_traR	I_traW	I_traY
NC_010793	Orientia_tsutsugamushi_str._Ikeda,_complete_genome._	Proteobacteria;	Alphaproteobacteria	circular	2008987	1967	T4SS	CONJ	F	T4SS_T4CP_MOB_F_1164	1100	1358	virb4@ORTS001c01_011740&0.556734&2.1e-50	traU	t4cp1@ORTS001c01_011610&0.963636&2.2e-06	t4cp2@ORTS001c01_013580&0.662162&6.3e-33@ORTS001c01_013280&0.513514&4.8e-05@ORTS001c01_011610&0.887387&1.6e-41@ORTS001c01_011160&0.887387&2.2e-42	t4cp3	MOBC	MOBF@ORTS001c01_011580&0.514773&1.1e-59&4.4e-18	MOBH	MOBPHEN	MOBQ@ORTS001c01_012490&0.940092&3.4e-34@ORTS001c01_011570&0.589862&2.1e-26	MOBV	MOBT	MOBB	F_traE@ORTS001c01_012860&0.678756&1.2e-15@ORTS001c01_012340&0.673575&2.4e-16	F_traH@ORTS001c01_012990&0.633406&7.6e-65	F_traK	F_traL@ORTS001c01_012850&0.57&0.00011@ORTS001c01_012330&0.54&0.00015	F_traN	F_traU@ORTS001c01_012920&0.97006&1.8e-116@ORTS001c01_011720&0.577844&4.5e-73	F_traV	F_traW@ORTS001c01_012900&0.886792&1.7e-56	F_trbC@ORTS001c01_012930&0.50655&1.1e-25	G_ICEHIN1056_000310	G_ICEHIN1056_000410	G_ICEHIN1056_000440	G_ICEHIN1056_000510	G_ICEHIN1056_000520	I_traI	I_traK	I_traL	I_traM	I_traN	I_traP	I_traQ	I_traR	I_traW	I_traY
NC_010793	Orientia_tsutsugamushi_str._Ikeda,_complete_genome._	Proteobacteria;	Alphaproteobacteria	circular	2008987	1967	T4SS	CONJ	F	T4SS_T4CP_MOB_F_1165	1466	1785	virb4@ORTS001c01_017390&0.661718&1.2e-74@ORTS001c01_015250&0.556734&1.9e-50	traU	t4cp1@ORTS001c01_015950&0.990909&3e-26@ORTS001c01_015120&0.963636&2.2e-06@ORTS001c01_014660&0.963636&3.4e-07	t4cp2@ORTS001c01_016420&0.905405&4.8e-42@ORTS001c01_015950&1&1.5e-53@ORTS001c01_015120&0.887387&1.6e-41@ORTS001c01_014660&0.887387&6e-42	t4cp3	MOBC	MOBF@ORTS001c01_014720&0.509091&4.1e-59&8.9e-18	MOBH	MOBPHEN	MOBQ@ORTS001c01_017100&0.940092&3.6e-37@ORTS001c01_017040&0.940092&1.2e-33@ORTS001c01_016760&0.940092&3.6e-37@ORTS001c01_015780&0.640553&5.1e-31@ORTS001c01_015080&0.940092&6.7e-36@ORTS001c01_014720&0.940092&2.3e-33	MOBV@ORTS001c01_017040&0.573529&0.00018@ORTS001c01_015780&0.598039&1.9e-06	MOBT	MOBB	F_traE@ORTS001c01_017850&0.943005&2.7e-21@ORTS001c01_017330&0.943005&1.3e-21@ORTS001c01_016840&0.689119&1.1e-13@ORTS001c01_016280&0.943005&2e-21@ORTS001c01_015310&0.943005&1.4e-21	F_traH@ORTS001c01_016380&0.629067&5.5e-64	F_traK	F_traL@ORTS001c01_017840&0.54&0.00029@ORTS001c01_017320&0.57&0.00012@ORTS001c01_016270&0.54&0.00032@ORTS001c01_015320&0.56&0.00013	F_traN@ORTS001c01_017450&0.50229&5.8e-74	F_traU@ORTS001c01_017430&0.97006&1.1e-116@ORTS001c01_016340&0.685629&1.6e-82@ORTS001c01_015230&0.577844&8.2e-71	F_traV	F_traW@ORTS001c01_017410&0.886792&2.7e-55	F_trbC@ORTS001c01_017440&0.50655&2e-26@ORTS001c01_016350&0.502183&1.5e-26@ORTS001c01_015220&0.502183&7.5e-26	G_ICEHIN1056_000310	G_ICEHIN1056_000410	G_ICEHIN1056_000440	G_ICEHIN1056_000510	G_ICEHIN1056_000520	I_traI	I_traK	I_traL	I_traM	I_traN	I_traP	I_traQ	I_traR	I_traW	I_traY
NC_010793	Orientia_tsutsugamushi_str._Ikeda,_complete_genome._	Proteobacteria;	Alphaproteobacteria	circular	2008987	1967	T4SS	CONJ	F	T4SS_T4CP_MOB_F_1166	1851	1872	virb4@ORTS001c01_018570&0.80912&2.2e-101	traU	t4cp1	t4cp2@ORTS001c01_018680&0.891892&7.2e-43	t4cp3	MOBC	MOBF@ORTS001c01_018710&0.515909&9.8e-60&4.3e-18	MOBH	MOBPHEN	MOBQ@ORTS001c01_018720&0.589862&2.1e-26	MOBV	MOBT	MOBB	F_traE@ORTS001c01_018520&0.943005&1.3e-21	F_traH@ORTS001c01_018640&0.613883&4.6e-65	F_traK	F_traL@ORTS001c01_018510&0.57&0.00012	F_traN@ORTS001c01_018620&0.642748&7.7e-72	F_traU@ORTS001c01_018600&0.97006&8.5e-119	F_traV	F_traW@ORTS001c01_018580&0.896226&8.9e-59	F_trbC@ORTS001c01_018610&0.502183&3.3e-25	G_ICEHIN1056_000310	G_ICEHIN1056_000410	G_ICEHIN1056_000440	G_ICEHIN1056_000510	G_ICEHIN1056_000520	I_traI	I_traK	I_traL	I_traM	I_traN	I_traP	I_traQ	I_traR	I_traW	I_traY
NC_010793	Orientia_tsutsugamushi_str._Ikeda,_complete_genome._	Proteobacteria;	Alphaproteobacteria	circular	2008987	1967	T4SS	MOB	F	T4SS_NOT4CP_MOB_F_1167	1941	1964	virb4@ORTS001c01_019480&0.556734&1.9e-50	traU	t4cp1	t4cp2	t4cp3	MOBC	MOBF	MOBH	MOBPHEN	MOBQ@ORTS001c01_019640&0.940092&1.2e-33	MOBV@ORTS001c01_019640&0.573529&0.00018	MOBT	MOBB	F_traE@ORTS001c01_019420&0.943005&1.3e-21	F_traH	F_traK	F_traL@ORTS001c01_019410&0.56&0.00013	F_traN@ORTS001c01_019520&0.50229&1.1e-74	F_traU@ORTS001c01_019500&0.577844&8.2e-71	F_traV	F_traW	F_trbC@ORTS001c01_019510&0.50655&2e-26	G_ICEHIN1056_000310	G_ICEHIN1056_000410	G_ICEHIN1056_000440	G_ICEHIN1056_000510	G_ICEHIN1056_000520	I_traI	I_traK	I_traL	I_traM	I_traN	I_traP	I_traQ	I_traR	I_traW	I_traY
NC_009488	Orientia_tsutsugamushi_Boryong,_complete_genome._	Proteobacteria;	Alphaproteobacteria	linear	2127051	1182	NOT4SS	NOMOB	O	NOT4SS_T4CP_NOMOB_O_1168	3	50	virb4	traU	t4cp1@ORTS002c01_000500&0.963636&6.1e-07@ORTS002c01_000070&0.990909&3e-26	t4cp2@ORTS002c01_000500&0.891892&1.7e-41@ORTS002c01_000070&1&1.5e-53	t4cp3	MOBC	MOBF	MOBH	MOBPHEN	MOBQ	MOBV	MOBT	MOBB	F_traE	F_traH	F_traK	F_traL	F_traN	F_traU	F_traV	F_traW	F_trbC@ORTS002c01_000330&0.50655&8.4e-26	G_ICEHIN1056_000310	G_ICEHIN1056_000410	G_ICEHIN1056_000440	G_ICEHIN1056_000510	G_ICEHIN1056_000520	I_traI	I_traK	I_traL	I_traM	I_traN	I_traP	I_traQ	I_traR	I_traW	I_traY
NC_009488	Orientia_tsutsugamushi_Boryong,_complete_genome._	Proteobacteria;	Alphaproteobacteria	linear	2127051	1182	NOT4SS	NOMOB	O	NOT4SS_NOT4CP_NOMOB_O_1169	133	192	virb4	traU	t4cp1	t4cp2	t4cp3	MOBC	MOBF	MOBH	MOBPHEN	MOBQ	MOBV	MOBT	MOBB	F_traE	F_traH	F_traK	F_traL	F_traN	F_traU	F_traV	F_traW	F_trbC@ORTS002c01_001330&0.502183&1.1e-25	G_ICEHIN1056_000310	G_ICEHIN1056_000410	G_ICEHIN1056_000440	G_ICEHIN1056_000510	G_ICEHIN1056_000520	I_traI	I_traK	I_traL	I_traM@ORTS002c01_001920&0.537118&2.4e-06	I_traN	I_traP	I_traQ	I_traR	I_traW	I_traY
NC_009488	Orientia_tsutsugamushi_Boryong,_complete_genome._	Proteobacteria;	Alphaproteobacteria	linear	2127051	1182	NOT4SS	NOMOB	O	NOT4SS_NOT4CP_NOMOB_O_1170	319	327	virb4	traU	t4cp1	t4cp2	t4cp3	MOBC	MOBF	MOBH	MOBPHEN	MOBQ	MOBV	MOBT	MOBB	F_traE@ORTS002c01_003190&0.88601&2.7e-21	F_traH	F_traK	F_traL	F_traN	F_traU	F_traV	F_traW	F_trbC@ORTS002c01_003270&0.502183&1.1e-25	G_ICEHIN1056_000310	G_ICEHIN1056_000410	G_ICEHIN1056_000440	G_ICEHIN1056_000510	G_ICEHIN1056_000520	I_traI	I_traK	I_traL	I_traM	I_traN	I_traP	I_traQ	I_traR	I_traW	I_traY
NC_009488	Orientia_tsutsugamushi_Boryong,_complete_genome._	Proteobacteria;	Alphaproteobacteria	linear	2127051	1182	T4SS	NOMOB	F	T4SS_T4CP_NOMOB_F_1171	395	853	virb4@ORTS002c01_005640&0.812301&1.3e-76	traU	t4cp1	t4cp2@ORTS002c01_008530&0.891892&4.6e-42@ORTS002c01_008260&0.504505&7.2e-25@ORTS002c01_008140&0.882883&1.5e-41@ORTS002c01_007360&0.891892&2.5e-42@ORTS002c01_005160&0.891892&2.3e-42@ORTS002c01_004920&0.891892&2.5e-42	t4cp3	MOBC	MOBF	MOBH	MOBPHEN	MOBQ	MOBV	MOBT	MOBB	F_traE@ORTS002c01_008480&0.943005&2e-22@ORTS002c01_007600&0.943005&2e-22@ORTS002c01_006930&0.943005&2e-22@ORTS002c01_006340&0.943005&2e-22@ORTS002c01_005780&0.943005&2e-22@ORTS002c01_005520&0.943005&2e-22@ORTS002c01_005220&0.943005&2e-22	F_traH	F_traK	F_traL@ORTS002c01_004010&0.54&0.00038	F_traN	F_traU@ORTS002c01_003960&0.694611&6.3e-81	F_traV	F_traW@ORTS002c01_008300&0.891509&1.9e-57@ORTS002c01_007400&0.891509&1.9e-57@ORTS002c01_004350&0.891509&1.9e-57	F_trbC@ORTS002c01_008520&0.502183&1.1e-25@ORTS002c01_008280&0.502183&1.1e-25@ORTS002c01_008120&0.502183&1.1e-25@ORTS002c01_007560&0.502183&1.1e-25@ORTS002c01_007380&0.502183&1.1e-25@ORTS002c01_006890&0.502183&1.1e-25@ORTS002c01_006670&0.502183&1.1e-25@ORTS002c01_006300&0.502183&1.1e-25@ORTS002c01_005740&0.502183&1.1e-25@ORTS002c01_005480&0.502183&1.1e-25@ORTS002c01_005180&0.502183&1.1e-25@ORTS002…	G_ICEHIN1056_000310	G_ICEHIN1056_000410	G_ICEHIN1056_000440	G_ICEHIN1056_000510	G_ICEHIN1056_000520	I_traI	I_traK	I_traL	I_traM	I_traN	I_traP	I_traQ	I_traR	I_traW	I_traY
NC_009488	Orientia_tsutsugamushi_Boryong,_complete_genome._	Proteobacteria;	Alphaproteobacteria	linear	2127051	1182	NOT4SS	NOMOB	O	NOT4SS_T4CP_NOMOB_O_1172	937	980	virb4	traU	t4cp1	t4cp2@ORTS002c01_009800&0.882883&1.5e-41	t4cp3	MOBC	MOBF	MOBH	MOBPHEN	MOBQ	MOBV	MOBT	MOBB	F_traE@ORTS002c01_009750&0.943005&2e-22@ORTS002c01_009400&0.943005&2e-22	F_traH	F_traK	F_traL	F_traN	F_traU	F_traV	F_traW	F_trbC@ORTS002c01_009790&0.502183&1.1e-25@ORTS002c01_009370&0.502183&1.1e-25	G_ICEHIN1056_000310	G_ICEHIN1056_000410	G_ICEHIN1056_000440	G_ICEHIN1056_000510	G_ICEHIN1056_000520	I_traI	I_traK	I_traL	I_traM	I_traN	I_traP	I_traQ	I_traR	I_traW	I_traY
NC_009488	Orientia_tsutsugamushi_Boryong,_complete_genome._	Proteobacteria;	Alphaproteobacteria	linear	2127051	1182	T4SS	NOMOB	O	T4SS_NOT4CP_NOMOB_O_1173	1053	1158	virb4@ORTS002c01_010870&0.816543&1.2e-202	traU	t4cp1	t4cp2	t4cp3	MOBC	MOBF	MOBH	MOBPHEN	MOBQ	MOBV	MOBT	MOBB	F_traE@ORTS002c01_011340&0.943005&2e-22@ORTS002c01_011130&0.943005&2e-22@ORTS002c01_010620&0.943005&2e-22	F_traH	F_traK	F_traL@ORTS002c01_010650&0.54&0.0002	F_traN	F_traU	F_traV	F_traW@ORTS002c01_011580&0.891509&1.9e-57	F_trbC@ORTS002c01_011560&0.502183&1.1e-25@ORTS002c01_011380&0.502183&1.1e-25@ORTS002c01_011170&0.502183&1.1e-25@ORTS002c01_010530&0.502183&1.1e-25	G_ICEHIN1056_000310	G_ICEHIN1056_000410	G_ICEHIN1056_000440	G_ICEHIN1056_000510	G_ICEHIN1056_000520	I_traI	I_traK	I_traL	I_traM	I_traN	I_traP	I_traQ	I_traR	I_traW	I_traY
NC_008686	Paracoccus_denitrificans_PD1222_chromosome_1,_complete_sequence._	Proteobacteria;	Alphaproteobacteria	circular	2852282	2799	T4SS	CONJ	T	T4SS_T4CP_MOB_T_1175	107	161	virb4@PADE001c01_001600&0.827147&7.2e-179	traU	t4cp1@PADE001c01_001490&1&6.3e-27	t4cp2@PADE001c01_001490&1&5.3e-56	t4cp3	MOBC	MOBF@PADE001c01_001070&0.611364&5e-70&9.9e-22	MOBH	MOBPHEN@PADE001c01_001460&0.875536&7.3e-29	MOBQ@PADE001c01_001070&0.995392&1.1e-79	MOBV	MOBT	MOBB	F_traE	F_traH	F_traK	F_traL	F_traN	F_traU	F_traV	F_traW	F_trbC	G_ICEHIN1056_000310	G_ICEHIN1056_000410	G_ICEHIN1056_000440	G_ICEHIN1056_000510	G_ICEHIN1056_000520	I_traI	I_traK	I_traL	I_traM	I_traN	I_traP	I_traQ	I_traR	I_traW	I_traY
NC_008686	Paracoccus_denitrificans_PD1222_chromosome_1,_complete_sequence._	Proteobacteria;	Alphaproteobacteria	circular	2852282	2799	T4SS	CONJ	T	T4SS_T4CP_MOB_T_1177	1480	1511	virb4@PADE001c01_014850&0.818664&3.5e-173	traU	t4cp1@PADE001c01_015100&1&3.2e-25	t4cp2@PADE001c01_015100&1&3e-54	t4cp3	MOBC	MOBF	MOBH	MOBPHEN@PADE001c01_015110&0.875536&6.4e-29	MOBQ	MOBV	MOBT	MOBB	F_traE	F_traH	F_traK	F_traL	F_traN	F_traU	F_traV	F_traW	F_trbC	G_ICEHIN1056_000310	G_ICEHIN1056_000410	G_ICEHIN1056_000440	G_ICEHIN1056_000510	G_ICEHIN1056_000520	I_traI	I_traK	I_traL	I_traM	I_traN	I_traP	I_traQ	I_traR	I_traW	I_traY
NC_008686	Paracoccus_denitrificans_PD1222_chromosome_1,_complete_sequence._	Proteobacteria;	Alphaproteobacteria	circular	2852282	2799	NOT4SS	MOB	O	NOT4SS_NOT4CP_MOB_O_1178	2413	2441	virb4	traU	t4cp1	t4cp2	t4cp3	MOBC	MOBF	MOBH	MOBPHEN@PADE001c01_024130&0.729614&0.0024	MOBQ	MOBV@PADE001c01_024410&0.936275&2.7e-21@PADE001c01_024130&0.936275&2.9e-21	MOBT	MOBB	F_traE	F_traH	F_traK	F_traL	F_traN	F_traU	F_traV	F_traW	F_trbC	G_ICEHIN1056_000310	G_ICEHIN1056_000410	G_ICEHIN1056_000440	G_ICEHIN1056_000510	G_ICEHIN1056_000520	I_traI	I_traK	I_traL	I_traM	I_traN	I_traP	I_traQ	I_traR	I_traW	I_traY
NC_008687	Paracoccus_denitrificans_PD1222_chromosome_2,_complete_sequence._	Proteobacteria;	Alphaproteobacteria	circular	1730097	1662	T4SS	CONJ	T	T4SS_T4CP_MOB_T_1179	355	370	virb4@PADE001c02_003650&0.825027&2.4e-172	traU	t4cp1@PADE001c02_003560&1&1.3e-26	t4cp2@PADE001c02_003560&1&1.6e-56	t4cp3	MOBC	MOBF	MOBH	MOBPHEN@PADE001c02_003550&0.776824&2.5e-24	MOBQ	MOBV	MOBT	MOBB	F_traE	F_traH	F_traK	F_traL	F_traN	F_traU	F_traV	F_traW	F_trbC	G_ICEHIN1056_000310	G_ICEHIN1056_000410	G_ICEHIN1056_000440	G_ICEHIN1056_000510	G_ICEHIN1056_000520	I_traI	I_traK	I_traL	I_traM	I_traN	I_traP	I_traQ	I_traR	I_traW	I_traY
NC_008687	Paracoccus_denitrificans_PD1222_chromosome_2,_complete_sequence._	Proteobacteria;	Alphaproteobacteria	circular	1730097	1662	NOT4SS	MOB	O	NOT4SS_NOT4CP_MOB_O_1180	537	537	virb4	traU	t4cp1	t4cp2	t4cp3	MOBC	MOBF	MOBH	MOBPHEN@PADE001c02_005370&0.879828&4e-30	MOBQ	MOBV	MOBT	MOBB	F_traE	F_traH	F_traK	F_traL	F_traN	F_traU	F_traV	F_traW	F_trbC	G_ICEHIN1056_000310	G_ICEHIN1056_000410	G_ICEHIN1056_000440	G_ICEHIN1056_000510	G_ICEHIN1056_000520	I_traI	I_traK	I_traL	I_traM	I_traN	I_traP	I_traQ	I_traR	I_traW	I_traY
NC_008687	Paracoccus_denitrificans_PD1222_chromosome_2,_complete_sequence._	Proteobacteria;	Alphaproteobacteria	circular	1730097	1662	NOT4SS	MOB	O	NOT4SS_NOT4CP_MOB_O_1181	982	982	virb4	traU	t4cp1	t4cp2	t4cp3	MOBC	MOBF	MOBH	MOBPHEN@PADE001c02_009820&0.854077&0.0027	MOBQ	MOBV@PADE001c02_009820&0.941176&1.1e-21	MOBT	MOBB	F_traE	F_traH	F_traK	F_traL	F_traN	F_traU	F_traV	F_traW	F_trbC	G_ICEHIN1056_000310	G_ICEHIN1056_000410	G_ICEHIN1056_000440	G_ICEHIN1056_000510	G_ICEHIN1056_000520	I_traI	I_traK	I_traL	I_traM	I_traN	I_traP	I_traQ	I_traR	I_traW	I_traY
NC_009615	Parabacteroides_distasonis_ATCC_8503,_complete_genome._	Bacteroidetes;	Bacteroidetes	circular	4811379	3850	NOT4SS	MOB	O	NOT4SS_NOT4CP_MOB_O_1183	1251	1251	virb4	traU	t4cp1	t4cp2	t4cp3	MOBC	MOBF	MOBH	MOBPHEN	MOBQ	MOBV	MOBT	MOBB@PADI001c01_012510&1&3.4e-83	F_traE	F_traH	F_traK	F_traL	F_traN	F_traU	F_traV	F_traW	F_trbC	G_ICEHIN1056_000310	G_ICEHIN1056_000410	G_ICEHIN1056_000440	G_ICEHIN1056_000510	G_ICEHIN1056_000520	I_traI	I_traK	I_traL	I_traM	I_traN	I_traP	I_traQ	I_traR	I_traW	I_traY
NC_009615	Parabacteroides_distasonis_ATCC_8503,_complete_genome._	Bacteroidetes;	Bacteroidetes	circular	4811379	3850	NOT4SS	MOB	O	NOT4SS_NOT4CP_MOB_O_1184	2128	2128	virb4	traU	t4cp1	t4cp2	t4cp3	MOBC	MOBF	MOBH	MOBPHEN	MOBQ	MOBV@PADI001c01_021280&0.995098&4.1e-37	MOBT	MOBB	F_traE	F_traH	F_traK	F_traL	F_traN	F_traU	F_traV	F_traW	F_trbC	G_ICEHIN1056_000310	G_ICEHIN1056_000410	G_ICEHIN1056_000440	G_ICEHIN1056_000510	G_ICEHIN1056_000520	I_traI	I_traK	I_traL	I_traM	I_traN	I_traP	I_traQ	I_traR	I_traW	I_traY
NC_009615	Parabacteroides_distasonis_ATCC_8503,_complete_genome._	Bacteroidetes;	Bacteroidetes	circular	4811379	3850	NOT4SS	MOB	O	NOT4SS_NOT4CP_MOB_O_1185	2217	2217	virb4	traU	t4cp1	t4cp2	t4cp3	MOBC	MOBF	MOBH	MOBPHEN@PADI001c01_022170&0.957082&2e-33	MOBQ	MOBV	MOBT	MOBB	F_traE	F_traH	F_traK	F_traL	F_traN	F_traU	F_traV	F_traW	F_trbC	G_ICEHIN1056_000310	G_ICEHIN1056_000410	G_ICEHIN1056_000440	G_ICEHIN1056_000510	G_ICEHIN1056_000520	I_traI	I_traK	I_traL	I_traM	I_traN	I_traP	I_traQ	I_traR	I_traW	I_traY
NC_009615	Parabacteroides_distasonis_ATCC_8503,_complete_genome._	Bacteroidetes;	Bacteroidetes	circular	4811379	3850	NOT4SS	MOB	O	NOT4SS_NOT4CP_MOB_O_1186	3232	3232	virb4	traU	t4cp1	t4cp2	t4cp3	MOBC	MOBF	MOBH	MOBPHEN@PADI001c01_032320&0.957082&1.5e-32	MOBQ	MOBV	MOBT	MOBB	F_traE	F_traH	F_traK	F_traL	F_traN	F_traU	F_traV	F_traW	F_trbC	G_ICEHIN1056_000310	G_ICEHIN1056_000410	G_ICEHIN1056_000440	G_ICEHIN1056_000510	G_ICEHIN1056_000520	I_traI	I_traK	I_traL	I_traM	I_traN	I_traP	I_traQ	I_traR	I_traW	I_traY
NC_009615	Parabacteroides_distasonis_ATCC_8503,_complete_genome._	Bacteroidetes;	Bacteroidetes	circular	4811379	3850	NOT4SS	MOB	O	NOT4SS_NOT4CP_MOB_O_1187	3489	3489	virb4	traU	t4cp1	t4cp2	t4cp3	MOBC	MOBF	MOBH	MOBPHEN@PADI001c01_034890&0.939914&2e-27	MOBQ	MOBV	MOBT	MOBB	F_traE	F_traH	F_traK	F_traL	F_traN	F_traU	F_traV	F_traW	F_trbC	G_ICEHIN1056_000310	G_ICEHIN1056_000410	G_ICEHIN1056_000440	G_ICEHIN1056_000510	G_ICEHIN1056_000520	I_traI	I_traK	I_traL	I_traM	I_traN	I_traP	I_traQ	I_traR	I_traW	I_traY
NC_009615	Parabacteroides_distasonis_ATCC_8503,_complete_genome._	Bacteroidetes;	Bacteroidetes	circular	4811379	3850	T4SS	NOMOB	O	T4SS_NOT4CP_NOMOB_O_1188	3875	3875	virb4@PADI001c01_038750&0.802757&9.2e-84	traU	t4cp1	t4cp2	t4cp3	MOBC	MOBF	MOBH	MOBPHEN	MOBQ	MOBV	MOBT	MOBB	F_traE	F_traH	F_traK	F_traL	F_traN	F_traU	F_traV	F_traW	F_trbC	G_ICEHIN1056_000310	G_ICEHIN1056_000410	G_ICEHIN1056_000440	G_ICEHIN1056_000510	G_ICEHIN1056_000520	I_traI	I_traK	I_traL	I_traM	I_traN	I_traP	I_traQ	I_traR	I_traW	I_traY
NC_009719	Parvibaculum_lavamentivorans_DS-1,_complete_genome._	Proteobacteria;	Alphaproteobacteria	circular	3914745	3636	T4SS	CONJ	T	T4SS_T4CP_MOB_T_1190	1197	1236	virb4@PALA001c01_012020&0.829268&8.1e-177	traU	t4cp1@PALA001c01_012070&1&8.2e-26	t4cp2@PALA001c01_012070&1&2.4e-53	t4cp3	MOBC	MOBF@PALA001c01_012360&0.514773&4.7e-28	MOBH	MOBPHEN@PALA001c01_012080&0.88412&4.8e-30	MOBQ	MOBV	MOBT	MOBB	F_traE	F_traH	F_traK	F_traL	F_traN	F_traU	F_traV	F_traW	F_trbC	G_ICEHIN1056_000310	G_ICEHIN1056_000410	G_ICEHIN1056_000440	G_ICEHIN1056_000510	G_ICEHIN1056_000520	I_traI	I_traK	I_traL	I_traM	I_traN	I_traP	I_traQ	I_traR	I_traW	I_traY
NC_009719	Parvibaculum_lavamentivorans_DS-1,_complete_genome._	Proteobacteria;	Alphaproteobacteria	circular	3914745	3636	T4SS	CONJ	T	T4SS_T4CP_MOB_T_1191	1840	1861	virb4@PALA001c01_018570&0.821845&8.3e-167	traU	t4cp1@PALA001c01_018520&1&2e-25	t4cp2@PALA001c01_018520&1&1.2e-55	t4cp3	MOBC	MOBF	MOBH	MOBPHEN@PALA001c01_018400&0.635193&7.6e-22	MOBQ	MOBV	MOBT	MOBB	F_traE	F_traH	F_traK	F_traL	F_traN	F_traU	F_traV	F_traW	F_trbC	G_ICEHIN1056_000310	G_ICEHIN1056_000410	G_ICEHIN1056_000440	G_ICEHIN1056_000510	G_ICEHIN1056_000520	I_traI	I_traK	I_traL	I_traM	I_traN	I_traP	I_traQ	I_traR	I_traW	I_traY
NC_009719	Parvibaculum_lavamentivorans_DS-1,_complete_genome._	Proteobacteria;	Alphaproteobacteria	circular	3914745	3636	T4SS	CONJ	G	T4SS_T4CP_MOB_G_1192	3437	3463	virb4@PALA001c01_034520&0.823966&6.1e-90	traU	t4cp1@PALA001c01_034420&0.990909&2.6e-10	t4cp2@PALA001c01_034420&0.963964&1.2e-30	t4cp3	MOBC	MOBF	MOBH@PALA001c01_034630&0.897059&6.4e-44	MOBPHEN	MOBQ	MOBV	MOBT	MOBB	F_traE	F_traH	F_traK	F_traL	F_traN	F_traU	F_traV	F_traW	F_trbC	G_ICEHIN1056_000310@PALA001c01_034370&0.950495&7e-75	G_ICEHIN1056_000410@PALA001c01_034480&0.968326&9e-110	G_ICEHIN1056_000440@PALA001c01_034510&0.971014&1.4e-64	G_ICEHIN1056_000510@PALA001c01_034570&0.991247&6e-205	G_ICEHIN1056_000520@PALA001c01_034560&0.993958&4.9e-151	I_traI	I_traK	I_traL	I_traM	I_traN	I_traP	I_traQ	I_traR	I_traW	I_traY
NC_009719	Parvibaculum_lavamentivorans_DS-1,_complete_genome._	Proteobacteria;	Alphaproteobacteria	circular	3914745	3636	T4SS	CONJ	T	T4SS_T4CP_MOB_T_1193	3533	3572	virb4@PALA001c01_035670&0.829268&8.1e-177	traU	t4cp1@PALA001c01_035620&1&8.2e-26	t4cp2@PALA001c01_035620&1&2.4e-53	t4cp3	MOBC	MOBF@PALA001c01_035330&0.514773&4.7e-28	MOBH	MOBPHEN@PALA001c01_035610&0.88412&4.8e-30	MOBQ	MOBV	MOBT	MOBB	F_traE	F_traH	F_traK	F_traL	F_traN	F_traU	F_traV	F_traW	F_trbC	G_ICEHIN1056_000310	G_ICEHIN1056_000410	G_ICEHIN1056_000440	G_ICEHIN1056_000510	G_ICEHIN1056_000520	I_traI	I_traK	I_traL	I_traM	I_traN	I_traP	I_traQ	I_traR	I_traW	I_traY
NC_005861	Candidatus_Protochlamydia_amoebophila_UWE25,_complete_genome._	Chlamydiae;	Chlamydiae	circular	2414465	2031	T4SS	NOMOB	F	T4SS_T4CP_NOMOB_F_1196	1454	1473	virb4@PASP001c01_014620&0.820785&6.5e-118	traU	t4cp1@PASP001c01_014730&0.990909&2.6e-08	t4cp2@PASP001c01_014730&0.905405&1.3e-38	t4cp3	MOBC	MOBF	MOBH	MOBPHEN	MOBQ	MOBV	MOBT	MOBB	F_traE@PASP001c01_014550&0.880829&7.6e-30	F_traH@PASP001c01_014710&0.939262&4.9e-97	F_traK@PASP001c01_014560&0.73741&1.2e-10	F_traL@PASP001c01_014540&0.85&1.4e-12	F_traN	F_traU@PASP001c01_014660&0.89521&7.9e-106	F_traV	F_traW@PASP001c01_014640&0.938679&4.6e-53	F_trbC@PASP001c01_014650&0.829694&1.3e-31	G_ICEHIN1056_000310	G_ICEHIN1056_000410	G_ICEHIN1056_000440	G_ICEHIN1056_000510	G_ICEHIN1056_000520	I_traI	I_traK	I_traL	I_traM	I_traN	I_traP	I_traQ	I_traR	I_traW	I_traY
NC_012917	Pectobacterium_carotovorum_subsp._carotovorum_PC1,_complete_genome._	Proteobacteria;	Gammaproteobacteria	circular	4862913	4246	NOT4SS	MOB	O	NOT4SS_NOT4CP_MOB_O_1197	503	503	virb4	traU	t4cp1	t4cp2	t4cp3	MOBC@PECR001c01_005030&1&1.3e-59	MOBF	MOBH	MOBPHEN	MOBQ	MOBV	MOBT	MOBB	F_traE	F_traH	F_traK	F_traL	F_traN	F_traU	F_traV	F_traW	F_trbC	G_ICEHIN1056_000310	G_ICEHIN1056_000410	G_ICEHIN1056_000440	G_ICEHIN1056_000510	G_ICEHIN1056_000520	I_traI	I_traK	I_traL	I_traM	I_traN	I_traP	I_traQ	I_traR	I_traW	I_traY
NC_012917	Pectobacterium_carotovorum_subsp._carotovorum_PC1,_complete_genome._	Proteobacteria;	Gammaproteobacteria	circular	4862913	4246	NOT4SS	MOB	O	NOT4SS_NOT4CP_MOB_O_1198	865	865	virb4	traU	t4cp1	t4cp2	t4cp3	MOBC@PECR001c01_008650&1&4.5e-57	MOBF	MOBH	MOBPHEN	MOBQ	MOBV	MOBT	MOBB	F_traE	F_traH	F_traK	F_traL	F_traN	F_traU	F_traV	F_traW	F_trbC	G_ICEHIN1056_000310	G_ICEHIN1056_000410	G_ICEHIN1056_000440	G_ICEHIN1056_000510	G_ICEHIN1056_000520	I_traI	I_traK	I_traL	I_traM	I_traN	I_traP	I_traQ	I_traR	I_traW	I_traY
NC_012917	Pectobacterium_carotovorum_subsp._carotovorum_PC1,_complete_genome._	Proteobacteria;	Gammaproteobacteria	circular	4862913	4246	NOT4SS	MOB	O	NOT4SS_NOT4CP_MOB_O_1199	1626	1626	virb4	traU	t4cp1	t4cp2	t4cp3	MOBC	MOBF	MOBH	MOBPHEN@PECR001c01_016260&0.88412&1.4e-21	MOBQ	MOBV	MOBT	MOBB	F_traE	F_traH	F_traK	F_traL	F_traN	F_traU	F_traV	F_traW	F_trbC	G_ICEHIN1056_000310	G_ICEHIN1056_000410	G_ICEHIN1056_000440	G_ICEHIN1056_000510	G_ICEHIN1056_000520	I_traI	I_traK	I_traL	I_traM	I_traN	I_traP	I_traQ	I_traR	I_traW	I_traY
NC_008525	Pediococcus_pentosaceus_ATCC_25745,_complete_genome._	Firmicutes;	Firmicutes	circular	1832387	1755	NOT4SS	MOB	O	NOT4SS_NOT4CP_MOB_O_1201	1151	1151	virb4	traU	t4cp1	t4cp2	t4cp3	MOBC	MOBF@PEPE001c01_011510&0.505682&2.6e-31	MOBH	MOBPHEN	MOBQ	MOBV	MOBT	MOBB	F_traE	F_traH	F_traK	F_traL	F_traN	F_traU	F_traV	F_traW	F_trbC	G_ICEHIN1056_000310	G_ICEHIN1056_000410	G_ICEHIN1056_000440	G_ICEHIN1056_000510	G_ICEHIN1056_000520	I_traI	I_traK	I_traL	I_traM	I_traN	I_traP	I_traQ	I_traR	I_traW	I_traY
NC_008609	Pelobacter_propionicus_DSM_2379,_complete_genome._	Proteobacteria;	Deltaproteobacteria	circular	4008000	3576	T4SS	NOMOB	F	T4SS_T4CP_NOMOB_F_1202	190	252	virb4@PEPR001c01_002470&0.801697&1.4e-113	traU	t4cp1@PEPR001c01_001900&0.972727&3.9e-09	t4cp2@PEPR001c01_002470&0.504505&0.0041@PEPR001c01_001900&0.927928&2.1e-24	t4cp3	MOBC	MOBF	MOBH	MOBPHEN	MOBQ	MOBV	MOBT	MOBB	F_traE@PEPR001c01_002510&0.948187&9e-48	F_traH@PEPR001c01_001930&0.943601&4.5e-61	F_traK@PEPR001c01_002500&0.917266&7.5e-37	F_traL@PEPR001c01_002520&0.91&2.4e-09	F_traN@PEPR001c01_002450&0.500763&3.1e-60	F_traU@PEPR001c01_002430&0.961078&2.8e-115	F_traV@PEPR001c01_002480&0.55102&1.4e-17	F_traW@PEPR001c01_002440&0.948113&2.7e-44	F_trbC@PEPR001c01_002420&0.703057&1.8e-30	G_ICEHIN1056_000310	G_ICEHIN1056_000410	G_ICEHIN1056_000440	G_ICEHIN1056_000510	G_ICEHIN1056_000520	I_traI	I_traK	I_traL	I_traM	I_traN	I_traP	I_traQ	I_traR	I_traW	I_traY
NC_008609	Pelobacter_propionicus_DSM_2379,_complete_genome._	Proteobacteria;	Deltaproteobacteria	circular	4008000	3576	NOT4SS	MOB	O	NOT4SS_NOT4CP_MOB_O_1204	1760	1760	virb4	traU	t4cp1	t4cp2	t4cp3	MOBC	MOBF	MOBH	MOBPHEN	MOBQ	MOBV	MOBT@PEPR001c01_017600&0.86612&2.1e-59	MOBB	F_traE	F_traH	F_traK	F_traL	F_traN	F_traU	F_traV	F_traW	F_trbC	G_ICEHIN1056_000310	G_ICEHIN1056_000410	G_ICEHIN1056_000440	G_ICEHIN1056_000510	G_ICEHIN1056_000520	I_traI	I_traK	I_traL	I_traM	I_traN	I_traP	I_traQ	I_traR	I_traW	I_traY
NC_013421	Pectobacterium_wasabiae_WPP163,_complete_genome._	Proteobacteria;	Gammaproteobacteria	circular	5063892	4437	T4SS	CONJ	G	T4SS_T4CP_MOB_G_1206	591	674	virb4@PEWA001c01_006300&0.826087&2.8e-81	traU	t4cp1@PEWA001c01_006130&0.990909&1.4e-13	t4cp2@PEWA001c01_006130&0.945946&6e-32	t4cp3	MOBC	MOBF	MOBH@PEWA001c01_006740&0.764706&1e-23	MOBPHEN	MOBQ	MOBV	MOBT	MOBB	F_traE	F_traH	F_traK	F_traL	F_traN	F_traU	F_traV	F_traW	F_trbC	G_ICEHIN1056_000310@PEWA001c01_005910&0.920792&1.4e-80	G_ICEHIN1056_000410@PEWA001c01_006240&0.959276&1.5e-100	G_ICEHIN1056_000440@PEWA001c01_006290&0.942029&1.6e-55	G_ICEHIN1056_000510@PEWA001c01_006450&0.960613&3.4e-180	G_ICEHIN1056_000520@PEWA001c01_006440&0.963746&2.9e-135	I_traI	I_traK	I_traL	I_traM	I_traN	I_traP	I_traQ	I_traR	I_traW	I_traY
NC_013421	Pectobacterium_wasabiae_WPP163,_complete_genome._	Proteobacteria;	Gammaproteobacteria	circular	5063892	4437	T4SS	CONJ	G	T4SS_T4CP_MOB_G_1207	1578	1607	virb4@PEWA001c01_015900&0.825027&5.4e-96	traU	t4cp1@PEWA001c01_016020&0.990909&3.8e-11	t4cp2@PEWA001c01_016020&0.977477&3.4e-32	t4cp3	MOBC	MOBF	MOBH@PEWA001c01_015780&0.911765&1.3e-42	MOBPHEN	MOBQ	MOBV	MOBT	MOBB	F_traE	F_traH	F_traK	F_traL	F_traN	F_traU	F_traV	F_traW	F_trbC	G_ICEHIN1056_000310@PEWA001c01_016070&0.772277&1.2e-60	G_ICEHIN1056_000410@PEWA001c01_015940&0.959276&5e-105	G_ICEHIN1056_000440@PEWA001c01_015910&0.992754&7.4e-62	G_ICEHIN1056_000510@PEWA001c01_015840&0.973742&2.1e-199	G_ICEHIN1056_000520@PEWA001c01_015850&0.97281&6.2e-145	I_traI	I_traK	I_traL	I_traM	I_traN	I_traP@PEWA001c01_015920&0.518828&0.00069	I_traQ	I_traR	I_traW	I_traY
NC_013421	Pectobacterium_wasabiae_WPP163,_complete_genome._	Proteobacteria;	Gammaproteobacteria	circular	5063892	4437	NOT4SS	MOB	O	NOT4SS_NOT4CP_MOB_O_1208	1672	1710	virb4	traU	t4cp1	t4cp2	t4cp3	MOBC	MOBF	MOBH	MOBPHEN@PEWA001c01_016720&0.879828&1.5e-21	MOBQ@PEWA001c01_017100&0.976959&1.6e-66	MOBV	MOBT	MOBB	F_traE	F_traH	F_traK	F_traL	F_traN	F_traU	F_traV	F_traW	F_trbC	G_ICEHIN1056_000310	G_ICEHIN1056_000410	G_ICEHIN1056_000440	G_ICEHIN1056_000510	G_ICEHIN1056_000520	I_traI	I_traK	I_traL	I_traM	I_traN	I_traP	I_traQ	I_traR	I_traW	I_traY
NC_005126	Photorhabdus_luminescens_subsp._laumondii_TTO1,_complete_genome._	Proteobacteria;	Gammaproteobacteria	circular	5688987	4683	T4SS	MOB	G	T4SS_NOT4CP_MOB_G_1211	1001	1057	virb4@PHLU001c01_010540&0.827147&6.4e-80	traU	t4cp1	t4cp2	t4cp3	MOBC	MOBF	MOBH@PHLU001c01_010010&0.936275&5.5e-21	MOBPHEN	MOBQ	MOBV	MOBT	MOBB	F_traE	F_traH	F_traK	F_traL	F_traN	F_traU	F_traV	F_traW	F_trbC	G_ICEHIN1056_000310@PHLU001c01_010220&0.757426&2e-62	G_ICEHIN1056_000410	G_ICEHIN1056_000440@PHLU001c01_010530&0.971014&6.1e-53	G_ICEHIN1056_000510@PHLU001c01_010570&0.967177&7.7e-176	G_ICEHIN1056_000520@PHLU001c01_010560&0.957704&4.5e-135	I_traI	I_traK	I_traL	I_traM	I_traN	I_traP	I_traQ	I_traR	I_traW	I_traY
NC_005126	Photorhabdus_luminescens_subsp._laumondii_TTO1,_complete_genome._	Proteobacteria;	Gammaproteobacteria	circular	5688987	4683	NOT4SS	MOB	O	NOT4SS_NOT4CP_MOB_O_1212	1121	1121	virb4	traU	t4cp1	t4cp2	t4cp3	MOBC	MOBF	MOBH@PHLU001c01_011210&0.936275&9.8e-22	MOBPHEN	MOBQ	MOBV	MOBT	MOBB	F_traE	F_traH	F_traK	F_traL	F_traN	F_traU	F_traV	F_traW	F_trbC	G_ICEHIN1056_000310	G_ICEHIN1056_000410	G_ICEHIN1056_000440	G_ICEHIN1056_000510	G_ICEHIN1056_000520	I_traI	I_traK	I_traL	I_traM	I_traN	I_traP	I_traQ	I_traR	I_traW	I_traY
NC_005126	Photorhabdus_luminescens_subsp._laumondii_TTO1,_complete_genome._	Proteobacteria;	Gammaproteobacteria	circular	5688987	4683	NOT4SS	MOB	O	NOT4SS_NOT4CP_MOB_O_1213	1783	1783	virb4	traU	t4cp1	t4cp2	t4cp3	MOBC	MOBF	MOBH	MOBPHEN	MOBQ@PHLU001c01_017830&0.976959&2.5e-66	MOBV	MOBT	MOBB	F_traE	F_traH	F_traK	F_traL	F_traN	F_traU	F_traV	F_traW	F_trbC	G_ICEHIN1056_000310	G_ICEHIN1056_000410	G_ICEHIN1056_000440	G_ICEHIN1056_000510	G_ICEHIN1056_000520	I_traI	I_traK	I_traL	I_traM	I_traN	I_traP	I_traQ	I_traR	I_traW	I_traY
NC_006371	Photobacterium_profundum_SS9_chromosome_2,_complete_sequence._	Proteobacteria;	Gammaproteobacteria	circular	2237943	2006	T4SS	CONJ	T	T4SS_T4CP_MOB_T_1214	1607	1632	virb4@PHPR001c02_016080&0.817603&6.4e-165	traU	t4cp1@PHPR001c02_016300&0.990909&3.8e-22	t4cp2@PHPR001c02_016300&1&9.4e-49	t4cp3	MOBC	MOBF	MOBH	MOBPHEN@PHPR001c02_016320&0.995708&5.1e-37	MOBQ	MOBV	MOBT	MOBB	F_traE	F_traH	F_traK	F_traL	F_traN	F_traU	F_traV	F_traW	F_trbC	G_ICEHIN1056_000310	G_ICEHIN1056_000410	G_ICEHIN1056_000440	G_ICEHIN1056_000510	G_ICEHIN1056_000520	I_traI	I_traK	I_traL	I_traM	I_traN	I_traP	I_traQ	I_traR	I_traW	I_traY
NC_011144	Phenylobacterium_zucineum_HLK1,_complete_genome._	Proteobacteria;	Alphaproteobacteria	circular	3996255	3529	T4SS	CONJ	T	T4SS_T4CP_MOB_T_1215	1526	1537	virb4@PHZU001c01_015330&0.83351&1.9e-170	traU	t4cp1@PHZU001c01_015270&1&1e-24	t4cp2@PHZU001c01_015270&1&1.9e-57	t4cp3	MOBC	MOBF	MOBH	MOBPHEN@PHZU001c01_015260&0.678112&8.7e-28	MOBQ	MOBV	MOBT	MOBB	F_traE	F_traH	F_traK	F_traL	F_traN	F_traU	F_traV	F_traW	F_trbC	G_ICEHIN1056_000310	G_ICEHIN1056_000410	G_ICEHIN1056_000440	G_ICEHIN1056_000510	G_ICEHIN1056_000520	I_traI	I_traK	I_traL	I_traM	I_traN	I_traP	I_traQ	I_traR	I_traW	I_traY
NC_011144	Phenylobacterium_zucineum_HLK1,_complete_genome._	Proteobacteria;	Alphaproteobacteria	circular	3996255	3529	NOT4SS	MOB	O	NOT4SS_NOT4CP_MOB_O_1216	2215	2215	virb4	traU	t4cp1	t4cp2	t4cp3	MOBC	MOBF	MOBH	MOBPHEN@PHZU001c01_022150&0.630901&2.8e-14	MOBQ	MOBV	MOBT	MOBB	F_traE	F_traH	F_traK	F_traL	F_traN	F_traU	F_traV	F_traW	F_trbC	G_ICEHIN1056_000310	G_ICEHIN1056_000410	G_ICEHIN1056_000440	G_ICEHIN1056_000510	G_ICEHIN1056_000520	I_traI	I_traK	I_traL	I_traM	I_traN	I_traP	I_traQ	I_traR	I_traW	I_traY
NC_011144	Phenylobacterium_zucineum_HLK1,_complete_genome._	Proteobacteria;	Alphaproteobacteria	circular	3996255	3529	T4SS	CONJ	T	T4SS_T4CP_MOB_T_1217	2380	2389	virb4@PHZU001c01_023810&0.815483&5.6e-218	traU	t4cp1@PHZU001c01_023880&0.972727&4e-27	t4cp2@PHZU001c01_023880&0.995495&1e-55	t4cp3	MOBC	MOBF	MOBH	MOBPHEN@PHZU001c01_023890&0.802575&6.4e-28	MOBQ	MOBV	MOBT	MOBB	F_traE	F_traH	F_traK	F_traL	F_traN	F_traU	F_traV	F_traW	F_trbC	G_ICEHIN1056_000310	G_ICEHIN1056_000410	G_ICEHIN1056_000440	G_ICEHIN1056_000510	G_ICEHIN1056_000520	I_traI	I_traK	I_traL	I_traM	I_traN	I_traP	I_traQ	I_traR	I_traW	I_traY
NC_002950	Porphyromonas_gingivalis_W83,_complete_genome._	Bacteroidetes;	Bacteroidetes	circular	2343476	1909	NOT4SS	MOB	O	NOT4SS_NOT4CP_MOB_O_1223	779	779	virb4	traU	t4cp1	t4cp2	t4cp3	MOBC	MOBF	MOBH	MOBPHEN@POGI001c01_007790&0.939914&1.4e-36	MOBQ	MOBV	MOBT	MOBB	F_traE	F_traH	F_traK	F_traL	F_traN	F_traU	F_traV	F_traW	F_trbC	G_ICEHIN1056_000310	G_ICEHIN1056_000410	G_ICEHIN1056_000440	G_ICEHIN1056_000510	G_ICEHIN1056_000520	I_traI	I_traK	I_traL	I_traM	I_traN	I_traP	I_traQ	I_traR	I_traW	I_traY
NC_002950	Porphyromonas_gingivalis_W83,_complete_genome._	Bacteroidetes;	Bacteroidetes	circular	2343476	1909	NOT4SS	MOB	O	NOT4SS_NOT4CP_MOB_O_1224	991	991	virb4	traU	t4cp1	t4cp2	t4cp3	MOBC	MOBF	MOBH	MOBPHEN	MOBQ	MOBV@POGI001c01_009910&0.965686&7.7e-40	MOBT	MOBB	F_traE	F_traH	F_traK	F_traL	F_traN	F_traU	F_traV	F_traW	F_trbC	G_ICEHIN1056_000310	G_ICEHIN1056_000410	G_ICEHIN1056_000440	G_ICEHIN1056_000510	G_ICEHIN1056_000520	I_traI	I_traK	I_traL	I_traM	I_traN	I_traP	I_traQ	I_traR	I_traW	I_traY
NC_002950	Porphyromonas_gingivalis_W83,_complete_genome._	Bacteroidetes;	Bacteroidetes	circular	2343476	1909	T4SS	CONJ	O	T4SS_T4CP_MOB_O_1225	1307	1316	virb4@POGI001c01_013070&0.78473&2.9e-88	traU	t4cp1@POGI001c01_013160&0.981818&1.7e-07	t4cp2@POGI001c01_013160&0.932432&8.7e-22	t4cp3	MOBC	MOBF	MOBH	MOBPHEN@POGI001c01_013150&0.639485&4.8e-27	MOBQ	MOBV	MOBT	MOBB	F_traE	F_traH	F_traK	F_traL	F_traN	F_traU	F_traV	F_traW	F_trbC	G_ICEHIN1056_000310	G_ICEHIN1056_000410	G_ICEHIN1056_000440	G_ICEHIN1056_000510	G_ICEHIN1056_000520	I_traI	I_traK	I_traL	I_traM	I_traN	I_traP	I_traQ	I_traR	I_traW	I_traY
NC_010729	Porphyromonas_gingivalis_ATCC_33277,_complete_genome._	Bacteroidetes;	Bacteroidetes	circular	2354886	2090	T4SS	CONJ	O	T4SS_T4CP_MOB_O_1226	68	79	virb4@POGI002c01_000680&0.767762&1.7e-85	traU	t4cp1@POGI002c01_000790&0.981818&1.8e-07	t4cp2@POGI002c01_000790&0.927928&9e-21	t4cp3	MOBC	MOBF	MOBH	MOBPHEN@POGI002c01_000780&0.879828&7e-24	MOBQ	MOBV	MOBT	MOBB	F_traE	F_traH	F_traK	F_traL	F_traN	F_traU	F_traV	F_traW	F_trbC	G_ICEHIN1056_000310	G_ICEHIN1056_000410	G_ICEHIN1056_000440	G_ICEHIN1056_000510	G_ICEHIN1056_000520	I_traI	I_traK	I_traL	I_traM	I_traN	I_traP	I_traQ	I_traR	I_traW	I_traY
NC_010729	Porphyromonas_gingivalis_ATCC_33277,_complete_genome._	Bacteroidetes;	Bacteroidetes	circular	2354886	2090	NOT4SS	MOB	O	NOT4SS_NOT4CP_MOB_O_1228	954	954	virb4	traU	t4cp1	t4cp2	t4cp3	MOBC	MOBF	MOBH	MOBPHEN@POGI002c01_009540&0.95279&5.7e-35	MOBQ	MOBV	MOBT	MOBB	F_traE	F_traH	F_traK	F_traL	F_traN	F_traU	F_traV	F_traW	F_trbC	G_ICEHIN1056_000310	G_ICEHIN1056_000410	G_ICEHIN1056_000440	G_ICEHIN1056_000510	G_ICEHIN1056_000520	I_traI	I_traK	I_traL	I_traM	I_traN	I_traP	I_traQ	I_traR	I_traW	I_traY
NC_008781	Polaromonas_naphthalenivorans_CJ2,_complete_genome._	Proteobacteria;	Betaproteobacteria	circular	4410291	4084	T4SS	CONJ	T	T4SS_T4CP_MOB_T_1229	2515	2545	virb4@PONA001c01_025160&0.825027&1.7e-169	traU	t4cp1@PONA001c01_025420&0.981818&2.6e-22	t4cp2@PONA001c01_025420&1&8.6e-61	t4cp3	MOBC	MOBF	MOBH	MOBPHEN@PONA001c01_025450&0.875536&7e-31	MOBQ	MOBV	MOBT	MOBB	F_traE	F_traH	F_traK	F_traL	F_traN	F_traU	F_traV	F_traW	F_trbC	G_ICEHIN1056_000310	G_ICEHIN1056_000410	G_ICEHIN1056_000440	G_ICEHIN1056_000510	G_ICEHIN1056_000520	I_traI	I_traK	I_traL	I_traM	I_traN	I_traP	I_traQ	I_traR	I_traW	I_traY
NC_006085	Propionibacterium_acnes_KPA171202,_complete_genome._	Actinobacteria;	Actinobacteria	circular	2560265	2297	NOT4SS	MOB	O	NOT4SS_NOT4CP_MOB_O_1230	853	853	virb4	traU	t4cp1	t4cp2	t4cp3	MOBC	MOBF@PRAC001c01_008530&0.523864&2.7e-77	MOBH	MOBPHEN	MOBQ	MOBV	MOBT	MOBB	F_traE	F_traH	F_traK	F_traL	F_traN	F_traU	F_traV	F_traW	F_trbC	G_ICEHIN1056_000310	G_ICEHIN1056_000410	G_ICEHIN1056_000440	G_ICEHIN1056_000510	G_ICEHIN1056_000520	I_traI	I_traK	I_traL	I_traM	I_traN	I_traP	I_traQ	I_traR	I_traW	I_traY
NC_011059	Prosthecochloris_aestuarii_DSM_271,_complete_genome._	Chlorobi;	Chlorobi	circular	2512923	2263	NOT4SS	MOB	O	NOT4SS_NOT4CP_MOB_O_1231	638	638	virb4	traU	t4cp1	t4cp2	t4cp3	MOBC	MOBF	MOBH	MOBPHEN@PRAE001c01_006380&0.918455&1.8e-21	MOBQ	MOBV	MOBT	MOBB	F_traE	F_traH	F_traK	F_traL	F_traN	F_traU	F_traV	F_traW	F_trbC	G_ICEHIN1056_000310	G_ICEHIN1056_000410	G_ICEHIN1056_000440	G_ICEHIN1056_000510	G_ICEHIN1056_000520	I_traI	I_traK	I_traL	I_traM	I_traN	I_traP	I_traQ	I_traR	I_traW	I_traY
NC_011059	Prosthecochloris_aestuarii_DSM_271,_complete_genome._	Chlorobi;	Chlorobi	circular	2512923	2263	T4SS	NOMOB	T	T4SS_NOT4CP_NOMOB_T_1232	1709	1715	virb4@PRAE001c01_017140&0.818664&2.1e-168	traU	t4cp1	t4cp2	t4cp3	MOBC	MOBF	MOBH	MOBPHEN	MOBQ	MOBV	MOBT	MOBB	F_traE	F_traH	F_traK	F_traL	F_traN	F_traU	F_traV	F_traW	F_trbC	G_ICEHIN1056_000310	G_ICEHIN1056_000410	G_ICEHIN1056_000440	G_ICEHIN1056_000510	G_ICEHIN1056_000520	I_traI	I_traK	I_traL	I_traM	I_traN	I_traP	I_traQ	I_traR	I_traW	I_traY
NC_010554	Proteus_mirabilis_HI4320,_complete_genome._	Proteobacteria;	Gammaproteobacteria	circular	4063606	3607	T4SS	CONJ	F	T4SS_T4CP_MOB_F_1234	2425	2469	virb4@PRMI001c01_024540&0.805938&1.7e-147	traU	t4cp1@PRMI001c01_024680&0.972727&8.2e-17	t4cp2@PRMI001c01_024680&0.986486&9.9e-31	t4cp3	MOBC	MOBF	MOBH@PRMI001c01_024690&0.995098&4.8e-69	MOBPHEN	MOBQ	MOBV	MOBT	MOBB	F_traE@PRMI001c01_024620&0.984456&1.2e-51	F_traH@PRMI001c01_024250&0.943601&2.2e-88	F_traK@PRMI001c01_024610&0.928058&1.6e-56	F_traL@PRMI001c01_024630&0.98&5.8e-27	F_traN@PRMI001c01_024490&1.02595&1.3e-57&5.5e-102	F_traU@PRMI001c01_024500&0.964072&7.6e-117	F_traV@PRMI001c01_024590&0.702041&1.5e-35	F_traW@PRMI001c01_024510&0.891509&1.2e-43	F_trbC	G_ICEHIN1056_000310	G_ICEHIN1056_000410	G_ICEHIN1056_000440	G_ICEHIN1056_000510	G_ICEHIN1056_000520	I_traI	I_traK	I_traL	I_traM	I_traN	I_traP	I_traQ	I_traR	I_traW	I_traY
NC_010554	Proteus_mirabilis_HI4320,_complete_genome._	Proteobacteria;	Gammaproteobacteria	circular	4063606	3607	T4SS	CONJ	G	T4SS_T4CP_MOB_G_1235	2545	2589	virb4@PRMI001c01_025710&0.834571&4e-75	traU	t4cp1@PRMI001c01_025830&0.990909&9.6e-12	t4cp2@PRMI001c01_025830&0.963964&3.8e-31	t4cp3	MOBC	MOBF	MOBH@PRMI001c01_025450&0.931373&2.7e-21	MOBPHEN	MOBQ	MOBV	MOBT	MOBB	F_traE	F_traH	F_traK	F_traL@PRMI001c01_025770&0.57&0.00025	F_traN	F_traU	F_traV	F_traW	F_trbC	G_ICEHIN1056_000310@PRMI001c01_025890&0.856436&6.9e-64	G_ICEHIN1056_000410@PRMI001c01_025760&0.954751&1.9e-101	G_ICEHIN1056_000440@PRMI001c01_025720&0.992754&3.3e-54	G_ICEHIN1056_000510@PRMI001c01_025670&0.964989&3.8e-176	G_ICEHIN1056_000520@PRMI001c01_025680&0.97281&4.7e-130	I_traI	I_traK	I_traL	I_traM	I_traN	I_traP	I_traQ	I_traR	I_traW	I_traY
NC_014033	Prevotella_ruminicola_23_chromosome,_complete_genome._	Bacteroidetes;	Bacteroidetes	circular	3619559	2763	NOT4SS	MOB	O	NOT4SS_NOT4CP_MOB_O_1236	1069	1069	virb4	traU	t4cp1	t4cp2	t4cp3	MOBC	MOBF	MOBH	MOBPHEN@PRRU001c01_010690&0.67382&1.1e-27	MOBQ	MOBV	MOBT	MOBB	F_traE	F_traH	F_traK	F_traL	F_traN	F_traU	F_traV	F_traW	F_trbC	G_ICEHIN1056_000310	G_ICEHIN1056_000410	G_ICEHIN1056_000440	G_ICEHIN1056_000510	G_ICEHIN1056_000520	I_traI	I_traK	I_traL	I_traM	I_traN	I_traP	I_traQ	I_traR	I_traW	I_traY
NC_008463	Pseudomonas_aeruginosa_UCBPP-PA14,_complete_genome._	Proteobacteria;	Gammaproteobacteria	circular	6537648	5892	T4SS	CONJ	T	T4SS_T4CP_MOB_T_1239	2503	2522	virb4@PSAE002c01_025080&0.816543&1.6e-181	traU	t4cp1@PSAE002c01_025120&1&9e-25	t4cp2@PSAE002c01_025120&1&3.8e-56	t4cp3	MOBC	MOBF	MOBH	MOBPHEN@PSAE002c01_025220&0.742489&5.8e-26	MOBQ	MOBV	MOBT	MOBB	F_traE	F_traH	F_traK	F_traL	F_traN	F_traU	F_traV	F_traW	F_trbC	G_ICEHIN1056_000310	G_ICEHIN1056_000410	G_ICEHIN1056_000440	G_ICEHIN1056_000510	G_ICEHIN1056_000520	I_traI	I_traK	I_traL	I_traM	I_traN	I_traP	I_traQ	I_traR	I_traW	I_traY
NC_008463	Pseudomonas_aeruginosa_UCBPP-PA14,_complete_genome._	Proteobacteria;	Gammaproteobacteria	circular	6537648	5892	T4SS	CONJ	G	T4SS_T4CP_MOB_G_1241	4814	4895	virb4@PSAE002c01_048760&0.806999&3.8e-87	traU	t4cp1@PSAE002c01_048530&0.836364&3.2e-09	t4cp2@PSAE002c01_048530&0.954955&5.6e-30	t4cp3	MOBC	MOBF	MOBH@PSAE002c01_048950&0.887255&6.6e-44	MOBPHEN	MOBQ	MOBV	MOBT	MOBB	F_traE	F_traH	F_traK	F_traL	F_traN	F_traU	F_traV	F_traW	F_trbC	G_ICEHIN1056_000310@PSAE002c01_048140&0.891089&9.2e-73	G_ICEHIN1056_000410@PSAE002c01_048720&0.950226&1.1e-91	G_ICEHIN1056_000440@PSAE002c01_048750&0.956522&5.6e-59	G_ICEHIN1056_000510@PSAE002c01_048820&0.986871&8.6e-180	G_ICEHIN1056_000520@PSAE002c01_048810&0.97281&6.1e-134	I_traI	I_traK	I_traL	I_traM	I_traN	I_traP	I_traQ	I_traR	I_traW	I_traY
NC_009656	Pseudomonas_aeruginosa_PA7,_complete_genome._	Proteobacteria;	Gammaproteobacteria	circular	6588339	6286	T4SS	CONJ	T	T4SS_T4CP_MOB_T_1242	3694	3722	virb4@PSAE003c01_036990&0.819724&6.3e-182	traU	t4cp1@PSAE003c01_037040&1&3.4e-24	t4cp2@PSAE003c01_037040&1&4.2e-56	t4cp3	MOBC	MOBF	MOBH	MOBPHEN@PSAE003c01_037220&0.738197&5.4e-25	MOBQ	MOBV	MOBT	MOBB	F_traE	F_traH	F_traK	F_traL	F_traN	F_traU	F_traV	F_traW	F_trbC	G_ICEHIN1056_000310	G_ICEHIN1056_000410	G_ICEHIN1056_000440	G_ICEHIN1056_000510	G_ICEHIN1056_000520	I_traI	I_traK	I_traL	I_traM	I_traN	I_traP	I_traQ	I_traR	I_traW	I_traY
NC_009656	Pseudomonas_aeruginosa_PA7,_complete_genome._	Proteobacteria;	Gammaproteobacteria	circular	6588339	6286	T4SS	CONJ	G	T4SS_T4CP_MOB_G_1243	4427	4523	virb4@PSAE003c01_045090&0.81018&3.2e-87	traU	t4cp1@PSAE003c01_044950&0.836364&3.1e-09	t4cp2@PSAE003c01_044950&0.954955&4.7e-30	t4cp3	MOBC	MOBF	MOBH@PSAE003c01_045230&0.867647&1e-43@PSAE003c01_044270&0.877451&1.9e-42	MOBPHEN	MOBQ	MOBV	MOBT	MOBB	F_traE	F_traH	F_traK	F_traL	F_traN	F_traU	F_traV	F_traW	F_trbC	G_ICEHIN1056_000310@PSAE003c01_044640&0.910891&6e-73	G_ICEHIN1056_000410@PSAE003c01_045050&0.950226&1.2e-91	G_ICEHIN1056_000440@PSAE003c01_045080&0.956522&5.3e-59	G_ICEHIN1056_000510@PSAE003c01_045150&0.989059&6.3e-180	G_ICEHIN1056_000520@PSAE003c01_045140&0.97281&2.2e-134	I_traI	I_traK	I_traL	I_traM	I_traN	I_traP	I_traQ	I_traR	I_traW	I_traY
NC_009656	Pseudomonas_aeruginosa_PA7,_complete_genome._	Proteobacteria;	Gammaproteobacteria	circular	6588339	6286	NOT4SS	MOB	O	NOT4SS_NOT4CP_MOB_O_1244	5340	5342	virb4	traU	t4cp1	t4cp2	t4cp3	MOBC	MOBF	MOBH	MOBPHEN	MOBQ@PSAE003c01_053400&0.930876&8.8e-57	MOBV	MOBT	MOBB	F_traE	F_traH	F_traK	F_traL	F_traN	F_traU	F_traV	F_traW	F_trbC	G_ICEHIN1056_000310	G_ICEHIN1056_000410	G_ICEHIN1056_000440	G_ICEHIN1056_000510	G_ICEHIN1056_000520	I_traI	I_traK	I_traL	I_traM	I_traN	I_traP	I_traQ	I_traR	I_traW	I_traY@PSAE003c01_053420&0.942282&2.7e-147
NC_011770	Pseudomonas_aeruginosa_LESB58,_complete_genome._	Proteobacteria;	Gammaproteobacteria	circular	6601757	5925	T4SS	CONJ	G	T4SS_T4CP_MOB_G_1246	2658	2688	virb4@PSAE004c01_026690&0.821845&7.9e-92	traU	t4cp1@PSAE004c01_026830&0.990909&5.6e-11	t4cp2@PSAE004c01_026830&0.977477&2.4e-30	t4cp3	MOBC	MOBF	MOBH@PSAE004c01_026580&0.911765&2.7e-43	MOBPHEN	MOBQ	MOBV	MOBT	MOBB	F_traE	F_traH	F_traK	F_traL	F_traN	F_traU	F_traV	F_traW	F_trbC	G_ICEHIN1056_000310@PSAE004c01_026880&0.747525&1.2e-64	G_ICEHIN1056_000410@PSAE004c01_026710&0.963801&1.8e-109	G_ICEHIN1056_000440	G_ICEHIN1056_000510@PSAE004c01_026640&0.991247&2.8e-205	G_ICEHIN1056_000520@PSAE004c01_026650&0.993958&9.4e-152	I_traI	I_traK	I_traL	I_traM	I_traN	I_traP	I_traQ	I_traR	I_traW	I_traY
NC_004129	Pseudomonas_fluorescens_Pf-5,_complete_genome._	Proteobacteria;	Gammaproteobacteria	circular	7074893	6138	T4SS	CONJ	G	T4SS_T4CP_MOB_G_1250	4671	4746	virb4@PSFL001c01_047020&0.806999&1.1e-88	traU	t4cp1@PSFL001c01_046920&0.818182&2.3e-08	t4cp2@PSFL001c01_046920&0.981982&3.1e-31	t4cp3	MOBC	MOBF	MOBH@PSFL001c01_047460&0.911765&3e-46	MOBPHEN	MOBQ	MOBV	MOBT	MOBB	F_traE	F_traH	F_traK	F_traL	F_traN	F_traU	F_traV	F_traW	F_trbC	G_ICEHIN1056_000310@PSFL001c01_046710&0.930693&1.8e-66	G_ICEHIN1056_000410@PSFL001c01_046990&0.918552&4.5e-89	G_ICEHIN1056_000440	G_ICEHIN1056_000510@PSFL001c01_047070&0.934354&4.5e-174	G_ICEHIN1056_000520@PSFL001c01_047060&0.963746&1.8e-133	I_traI	I_traK	I_traL	I_traM	I_traN	I_traP	I_traQ	I_traR	I_traW	I_traY
NC_007492	Pseudomonas_fluorescens_Pf0-1,_complete_genome._	Proteobacteria;	Gammaproteobacteria	circular	6438405	5736	T4SS	CONJ	G	T4SS_T4CP_MOB_G_1251	3048	3075	virb4@PSFL002c01_030640&0.821845&3.6e-95	traU	t4cp1@PSFL002c01_030530&0.990909&4.6e-12	t4cp2@PSFL002c01_030530&0.963964&6.9e-30	t4cp3	MOBC	MOBF	MOBH@PSFL002c01_030750&0.911765&4.8e-39	MOBPHEN	MOBQ	MOBV	MOBT	MOBB	F_traE	F_traH	F_traK	F_traL	F_traN	F_traU	F_traV	F_traW	F_trbC	G_ICEHIN1056_000310@PSFL002c01_030480&0.816832&2.4e-62	G_ICEHIN1056_000410@PSFL002c01_030600&0.927602&3.2e-101	G_ICEHIN1056_000440@PSFL002c01_030630&0.891304&4.9e-58	G_ICEHIN1056_000510@PSFL002c01_030680&0.969365&4.1e-179	G_ICEHIN1056_000520@PSFL002c01_030670&0.957704&1.2e-132	I_traI	I_traK	I_traL	I_traM	I_traN	I_traP	I_traQ	I_traR	I_traW	I_traY
NC_012660	Pseudomonas_fluorescens_SBW25,_complete_genome._	Proteobacteria;	Gammaproteobacteria	circular	6722539	5921	T4SS	CONJ	G	T4SS_T4CP_MOB_G_1252	1885	1925	virb4@PSFL003c01_018960&0.814422&6.4e-94	traU	t4cp1@PSFL003c01_019250&0.990909&2.3e-12	t4cp2@PSFL003c01_019250&0.932432&4.4e-29	t4cp3	MOBC	MOBF	MOBH@PSFL003c01_018850&0.911765&9.5e-40	MOBPHEN	MOBQ	MOBV	MOBT	MOBB	F_traE	F_traH	F_traK	F_traL@PSFL003c01_019010&0.6&0.00085	F_traN	F_traU	F_traV	F_traW	F_trbC	G_ICEHIN1056_000310	G_ICEHIN1056_000410@PSFL003c01_019000&0.927602&5.3e-101	G_ICEHIN1056_000440@PSFL003c01_018970&0.934783&1.8e-58	G_ICEHIN1056_000510@PSFL003c01_018920&0.958425&9.4e-179	G_ICEHIN1056_000520@PSFL003c01_018930&0.951662&1.2e-134	I_traI	I_traK	I_traL	I_traM	I_traN	I_traP	I_traQ	I_traR	I_traW	I_traY
NC_007481	Pseudoalteromonas_haloplanktis_TAC125_chromosome_I,_complete_genome._	Proteobacteria;	Gammaproteobacteria	circular	3214944	2939	NOT4SS	MOB	O	NOT4SS_NOT4CP_MOB_O_1254	2160	2160	virb4	traU	t4cp1	t4cp2	t4cp3	MOBC@PSHA001c01_021600&0.853081&1e-06	MOBF	MOBH	MOBPHEN	MOBQ	MOBV	MOBT	MOBB	F_traE	F_traH	F_traK	F_traL	F_traN	F_traU	F_traV	F_traW	F_trbC	G_ICEHIN1056_000310	G_ICEHIN1056_000410	G_ICEHIN1056_000440	G_ICEHIN1056_000510	G_ICEHIN1056_000520	I_traI	I_traK	I_traL	I_traM	I_traN	I_traP	I_traQ	I_traR	I_traW	I_traY
NC_010322	Pseudomonas_putida_GB-1,_complete_genome._	Proteobacteria;	Gammaproteobacteria	circular	6078430	5409	NOT4SS	MOB	O	NOT4SS_NOT4CP_MOB_O_1258	4216	4216	virb4	traU	t4cp1	t4cp2	t4cp3	MOBC	MOBF	MOBH	MOBPHEN@PSPU002c01_042160&0.742489&2.3e-24	MOBQ	MOBV	MOBT	MOBB	F_traE	F_traH	F_traK	F_traL	F_traN	F_traU	F_traV	F_traW	F_trbC	G_ICEHIN1056_000310	G_ICEHIN1056_000410	G_ICEHIN1056_000440	G_ICEHIN1056_000510	G_ICEHIN1056_000520	I_traI	I_traK	I_traL	I_traM	I_traN	I_traP	I_traQ	I_traR	I_traW	I_traY
NC_010501	Pseudomonas_putida_W619,_complete_genome._	Proteobacteria;	Gammaproteobacteria	circular	5774330	5182	NOT4SS	MOB	O	NOT4SS_NOT4CP_MOB_O_1259	838	840	virb4	traU	t4cp1	t4cp2	t4cp3	MOBC	MOBF	MOBH	MOBPHEN@PSPU003c01_008400&0.866953&8.3e-23	MOBQ	MOBV	MOBT	MOBB	F_traE	F_traH	F_traK	F_traL	F_traN	F_traU	F_traV	F_traW	F_trbC	G_ICEHIN1056_000310	G_ICEHIN1056_000410	G_ICEHIN1056_000440	G_ICEHIN1056_000510	G_ICEHIN1056_000520	I_traI	I_traK	I_traL	I_traM	I_traN	I_traP	I_traQ	I_traR@PSPU003c01_008380&1.02985&5.2e-05&0.0002	I_traW	I_traY
NC_010501	Pseudomonas_putida_W619,_complete_genome._	Proteobacteria;	Gammaproteobacteria	circular	5774330	5182	T4SS	CONJ	G	T4SS_T4CP_MOB_G_1260	3326	3365	virb4@PSPU003c01_033560&0.812301&2.9e-99	traU	t4cp1@PSPU003c01_033310&0.990909&2.2e-13	t4cp2@PSPU003c01_033310&0.959459&2.8e-30	t4cp3	MOBC	MOBF	MOBH@PSPU003c01_033650&0.911765&7.9e-42	MOBPHEN	MOBQ	MOBV	MOBT	MOBB	F_traE	F_traH	F_traK	F_traL@PSPU003c01_033510&0.73&4.9e-05	F_traN	F_traU	F_traV	F_traW	F_trbC	G_ICEHIN1056_000310@PSPU003c01_033260&0.767327&8.1e-56	G_ICEHIN1056_000410@PSPU003c01_033520&0.927602&9.7e-100	G_ICEHIN1056_000440@PSPU003c01_033550&0.934783&1.6e-58	G_ICEHIN1056_000510@PSPU003c01_033580&0.980306&3.2e-178	G_ICEHIN1056_000520@PSPU003c01_033570&0.978852&8.9e-134	I_traI	I_traK	I_traL	I_traM	I_traN	I_traP	I_traQ	I_traR	I_traW	I_traY
NC_009512	Pseudomonas_putida_F1,_complete_genome._	Proteobacteria;	Gammaproteobacteria	circular	5959964	5252	T4SS	CONJ	G	T4SS_T4CP_MOB_G_1261	2930	2963	virb4@PSPU004c01_029490&0.811241&5.7e-98	traU	t4cp1@PSPU004c01_029350&0.990909&3.7e-13	t4cp2@PSPU004c01_029350&0.959459&3.6e-29	t4cp3	MOBC	MOBF	MOBH@PSPU004c01_029630&0.965686&4.9e-42	MOBPHEN	MOBQ	MOBV	MOBT	MOBB	F_traE	F_traH	F_traK	F_traL@PSPU004c01_029440&0.74&4.3e-05	F_traN	F_traU	F_traV	F_traW	F_trbC	G_ICEHIN1056_000310@PSPU004c01_029300&0.767327&5.6e-58	G_ICEHIN1056_000410@PSPU004c01_029450&0.927602&1.7e-99	G_ICEHIN1056_000440@PSPU004c01_029480&0.934783&4.4e-59	G_ICEHIN1056_000510@PSPU004c01_029550&0.964989&5e-178	G_ICEHIN1056_000520@PSPU004c01_029540&0.984894&4e-135	I_traI	I_traK	I_traL	I_traM	I_traN	I_traP	I_traQ	I_traR	I_traW	I_traY
NC_004578	Pseudomonas_syringae_pv._tomato_str._DC3000,_complete_genome._	Proteobacteria;	Gammaproteobacteria	circular	6397126	5476	T4SS	CONJ	G	T4SS_T4CP_MOB_G_1264	833	877	virb4@PSSY001c01_008570&0.773065&2.3e-90	traU	t4cp1	t4cp2@PSSY001c01_008770&0.878378&3.1e-32	t4cp3	MOBC	MOBF	MOBH@PSSY001c01_008330&0.921569&4.3e-39	MOBPHEN	MOBQ	MOBV	MOBT	MOBB	F_traE	F_traH	F_traK	F_traL@PSSY001c01_008640&0.64&6.3e-05	F_traN	F_traU	F_traV	F_traW	F_trbC	G_ICEHIN1056_000310	G_ICEHIN1056_000410@PSSY001c01_008610&0.954751&4.4e-95	G_ICEHIN1056_000440@PSSY001c01_008580&0.949275&1.1e-58	G_ICEHIN1056_000510@PSSY001c01_008450&0.984683&9.6e-179	G_ICEHIN1056_000520@PSSY001c01_008460&0.975831&2.1e-138	I_traI	I_traK	I_traL	I_traM	I_traN	I_traP	I_traQ	I_traR	I_traW	I_traY
NC_004578	Pseudomonas_syringae_pv._tomato_str._DC3000,_complete_genome._	Proteobacteria;	Gammaproteobacteria	circular	6397126	5476	NOT4SS	MOB	O	NOT4SS_NOT4CP_MOB_O_1265	1090	1094	virb4	traU	t4cp1	t4cp2	t4cp3	MOBC	MOBF	MOBH	MOBPHEN@PSSY001c01_010900&0.93133&4e-48	MOBQ	MOBV	MOBT	MOBB	F_traE	F_traH	F_traK	F_traL	F_traN	F_traU	F_traV	F_traW	F_trbC	G_ICEHIN1056_000310	G_ICEHIN1056_000410	G_ICEHIN1056_000440	G_ICEHIN1056_000510	G_ICEHIN1056_000520	I_traI	I_traK	I_traL	I_traM	I_traN	I_traP	I_traQ	I_traR	I_traW	I_traY@PSSY001c01_010940&0.944966&2.1e-126
NC_007005	Pseudomonas_syringae_pv._syringae_B728a,_complete_genome._	Proteobacteria;	Gammaproteobacteria	circular	6093698	5089	NOT4SS	MOB	O	NOT4SS_NOT4CP_MOB_O_1267	735	735	virb4	traU	t4cp1	t4cp2	t4cp3	MOBC	MOBF	MOBH@PSSY002c01_007350&0.911765&3.6e-40	MOBPHEN	MOBQ	MOBV	MOBT	MOBB	F_traE	F_traH	F_traK	F_traL	F_traN	F_traU	F_traV	F_traW	F_trbC	G_ICEHIN1056_000310	G_ICEHIN1056_000410	G_ICEHIN1056_000440	G_ICEHIN1056_000510	G_ICEHIN1056_000520	I_traI	I_traK	I_traL	I_traM	I_traN	I_traP	I_traQ	I_traR	I_traW	I_traY
NC_007005	Pseudomonas_syringae_pv._syringae_B728a,_complete_genome._	Proteobacteria;	Gammaproteobacteria	circular	6093698	5089	T4SS	CONJ	G	T4SS_T4CP_MOB_G_1268_O_1269	1422	1517	virb4@PSSY002c01_014410&0.799576&1.3e-92	traU	t4cp1@PSSY002c01_014530&0.990909&2.6e-11	t4cp2@PSSY002c01_014530&0.981982&6e-33	t4cp3	MOBC	MOBF	MOBH@PSSY002c01_014220&0.906863&1.1e-39	MOBPHEN	MOBQ	MOBV	MOBT	MOBB	F_traE	F_traH	F_traK	F_traL@PSSY002c01_014460&0.62&0.0002	F_traN	F_traU	F_traV	F_traW	F_trbC	G_ICEHIN1056_000310@PSSY002c01_015170&0.846535&6e-64	G_ICEHIN1056_000410@PSSY002c01_014450&0.950226&3.4e-95	G_ICEHIN1056_000440@PSSY002c01_014420&0.942029&2.3e-58	G_ICEHIN1056_000510@PSSY002c01_014280&0.980306&2.1e-175	G_ICEHIN1056_000520@PSSY002c01_014290&0.978852&1.5e-138	I_traI	I_traK	I_traL	I_traM	I_traN	I_traP	I_traQ	I_traR	I_traW	I_traY
NC_003413	Pyrococcus_furiosus_DSM_3638,_complete_genome._	Euryarchaeota;	Euryarchaeota	circular	1908256	2125	NOT4SS	MOB	O	NOT4SS_NOT4CP_MOB_O_1272	187	187	virb4	traU	t4cp1	t4cp2	t4cp3	MOBC	MOBF	MOBH	MOBPHEN	MOBQ	MOBV@PYFU001c01_001870&0.578431&4.3e-05	MOBT	MOBB	F_traE	F_traH	F_traK	F_traL	F_traN	F_traU	F_traV	F_traW	F_trbC	G_ICEHIN1056_000310	G_ICEHIN1056_000410	G_ICEHIN1056_000440	G_ICEHIN1056_000510	G_ICEHIN1056_000520	I_traI	I_traK	I_traL	I_traM	I_traN	I_traP	I_traQ	I_traR	I_traW	I_traY
NC_008313	Ralstonia_eutropha_H16_chromosome_1,_complete_sequence._	Proteobacteria;	Betaproteobacteria	circular	4052032	3651	NOT4SS	MOB	O	NOT4SS_NOT4CP_MOB_O_1275	2447	2447	virb4	traU	t4cp1	t4cp2	t4cp3	MOBC	MOBF	MOBH	MOBPHEN	MOBQ@RAEU002c01_024470&0.612903&1.5e-19	MOBV	MOBT	MOBB	F_traE	F_traH	F_traK	F_traL	F_traN	F_traU	F_traV	F_traW	F_trbC	G_ICEHIN1056_000310	G_ICEHIN1056_000410	G_ICEHIN1056_000440	G_ICEHIN1056_000510	G_ICEHIN1056_000520	I_traI	I_traK	I_traL	I_traM	I_traN	I_traP	I_traQ	I_traR	I_traW	I_traY
NC_007973	Ralstonia_metallidurans_CH34_chromosome_1,_complete_sequence._	Proteobacteria;	Betaproteobacteria	circular	3928089	3601	NOT4SS	MOB	O	NOT4SS_NOT4CP_MOB_O_1277	1273	1273	virb4	traU	t4cp1	t4cp2	t4cp3	MOBC	MOBF	MOBH	MOBPHEN@RAME001c01_012730&0.879828&3.4e-26	MOBQ	MOBV	MOBT	MOBB	F_traE	F_traH	F_traK	F_traL	F_traN	F_traU	F_traV	F_traW	F_trbC	G_ICEHIN1056_000310	G_ICEHIN1056_000410	G_ICEHIN1056_000440	G_ICEHIN1056_000510	G_ICEHIN1056_000520	I_traI	I_traK	I_traL	I_traM	I_traN	I_traP	I_traQ	I_traR	I_traW	I_traY
NC_007973	Ralstonia_metallidurans_CH34_chromosome_1,_complete_sequence._	Proteobacteria;	Betaproteobacteria	circular	3928089	3601	T4SS	CONJ	T	T4SS_T4CP_MOB_T_1278_O_1277	1273	1361	virb4@RAME001c01_013560&0.801697&6.8e-186	traU	t4cp1@RAME001c01_013510&1&9e-25	t4cp2@RAME001c01_013510&1&1.4e-54	t4cp3	MOBC	MOBF	MOBH	MOBPHEN@RAME001c01_012730&0.879828&3.4e-26	MOBQ	MOBV	MOBT	MOBB	F_traE	F_traH	F_traK	F_traL	F_traN	F_traU	F_traV	F_traW	F_trbC	G_ICEHIN1056_000310	G_ICEHIN1056_000410	G_ICEHIN1056_000440	G_ICEHIN1056_000510	G_ICEHIN1056_000520	I_traI	I_traK	I_traL	I_traM	I_traN	I_traP	I_traQ	I_traR	I_traW	I_traY
NC_007973	Ralstonia_metallidurans_CH34_chromosome_1,_complete_sequence._	Proteobacteria;	Betaproteobacteria	circular	3928089	3601	T4SS	CONJ	T	T4SS_T4CP_MOB_T_1279	1501	1570	virb4@RAME001c01_015650&0.823966&1.1e-183	traU	t4cp1@RAME001c01_015600&1&9e-25	t4cp2@RAME001c01_015600&1&1.2e-55	t4cp3	MOBC	MOBF	MOBH	MOBPHEN@RAME001c01_015010&0.729614&2.4e-23	MOBQ	MOBV	MOBT	MOBB	F_traE	F_traH	F_traK	F_traL	F_traN	F_traU	F_traV	F_traW	F_trbC	G_ICEHIN1056_000310	G_ICEHIN1056_000410	G_ICEHIN1056_000440	G_ICEHIN1056_000510	G_ICEHIN1056_000520	I_traI	I_traK	I_traL	I_traM	I_traN	I_traP	I_traQ	I_traR	I_traW	I_traY
NC_007973	Ralstonia_metallidurans_CH34_chromosome_1,_complete_sequence._	Proteobacteria;	Betaproteobacteria	circular	3928089	3601	T4SS	CONJ	G	T4SS_T4CP_MOB_G_1280	2355	2388	virb4@RAME001c01_023770&0.820785&2.2e-89	traU	t4cp1@RAME001c01_023600&0.990909&5.6e-11	t4cp2@RAME001c01_023600&0.977477&2.4e-30	t4cp3	MOBC	MOBF	MOBH@RAME001c01_023880&0.911765&2.7e-43	MOBPHEN	MOBQ	MOBV	MOBT	MOBB	F_traE@RAME001c01_023730&0.512953&0.00028	F_traH	F_traK	F_traL	F_traN	F_traU	F_traV	F_traW	F_trbC	G_ICEHIN1056_000310@RAME001c01_023550&0.970297&3.9e-72	G_ICEHIN1056_000410@RAME001c01_023730&0.963801&1.5e-109	G_ICEHIN1056_000440@RAME001c01_023760&0.985507&6.4e-64	G_ICEHIN1056_000510@RAME001c01_023820&0.991247&4e-205	G_ICEHIN1056_000520@RAME001c01_023810&0.987915&2.9e-150	I_traI	I_traK	I_traL	I_traM	I_traN	I_traP	I_traQ	I_traR	I_traW	I_traY
NC_007973	Ralstonia_metallidurans_CH34_chromosome_1,_complete_sequence._	Proteobacteria;	Betaproteobacteria	circular	3928089	3601	NOT4SS	MOB	O	NOT4SS_NOT4CP_MOB_O_1281	2855	2867	virb4	traU	t4cp1	t4cp2	t4cp3	MOBC	MOBF	MOBH	MOBPHEN@RAME001c01_028670&0.798283&4.5e-30	MOBQ	MOBV	MOBT	MOBB	F_traE	F_traH	F_traK	F_traL	F_traN	F_traU	F_traV	F_traW	F_trbC	G_ICEHIN1056_000310	G_ICEHIN1056_000410	G_ICEHIN1056_000440	G_ICEHIN1056_000510	G_ICEHIN1056_000520	I_traI	I_traK	I_traL	I_traM	I_traN	I_traP	I_traQ	I_traR	I_traW	I_traY@RAME001c01_028550&0.978523&9.3e-166
NC_007973	Ralstonia_metallidurans_CH34_chromosome_1,_complete_sequence._	Proteobacteria;	Betaproteobacteria	circular	3928089	3601	NOT4SS	MOB	O	NOT4SS_NOT4CP_MOB_O_1282	3046	3046	virb4	traU	t4cp1	t4cp2	t4cp3	MOBC	MOBF	MOBH	MOBPHEN@RAME001c01_030460&0.785408&1e-24	MOBQ	MOBV	MOBT	MOBB	F_traE	F_traH	F_traK	F_traL	F_traN	F_traU	F_traV	F_traW	F_trbC	G_ICEHIN1056_000310	G_ICEHIN1056_000410	G_ICEHIN1056_000440	G_ICEHIN1056_000510	G_ICEHIN1056_000520	I_traI	I_traK	I_traL	I_traM	I_traN	I_traP	I_traQ	I_traR	I_traW	I_traY
NC_010682	Ralstonia_pickettii_12J_chromosome_1,_complete_sequence._	Proteobacteria;	Betaproteobacteria	circular	3942557	3709	NOT4SS	MOB	O	NOT4SS_NOT4CP_MOB_O_1283	441	441	virb4	traU	t4cp1	t4cp2	t4cp3	MOBC	MOBF	MOBH	MOBPHEN@RAPI001c01_004410&0.974249&9e-28	MOBQ	MOBV	MOBT	MOBB	F_traE	F_traH	F_traK	F_traL	F_traN	F_traU	F_traV	F_traW	F_trbC	G_ICEHIN1056_000310	G_ICEHIN1056_000410	G_ICEHIN1056_000440	G_ICEHIN1056_000510	G_ICEHIN1056_000520	I_traI	I_traK	I_traL	I_traM	I_traN	I_traP	I_traQ	I_traR	I_traW	I_traY
NC_010682	Ralstonia_pickettii_12J_chromosome_1,_complete_sequence._	Proteobacteria;	Betaproteobacteria	circular	3942557	3709	T4SS	CONJ	T	T4SS_T4CP_MOB_T_1284	1508	1517	virb4@RAPI001c01_015120&0.81018&1.8e-145	traU	t4cp1@RAPI001c01_015080&0.754545&3.5e-08	t4cp2@RAPI001c01_015080&0.990991&1.6e-42	t4cp3	MOBC	MOBF	MOBH@RAPI001c01_015090&0.926471&3.4e-51	MOBPHEN	MOBQ	MOBV	MOBT	MOBB	F_traE	F_traH	F_traK	F_traL	F_traN	F_traU	F_traV	F_traW	F_trbC	G_ICEHIN1056_000310	G_ICEHIN1056_000410	G_ICEHIN1056_000440	G_ICEHIN1056_000510	G_ICEHIN1056_000520	I_traI	I_traK	I_traL	I_traM	I_traN	I_traP	I_traQ	I_traR	I_traW	I_traY
NC_010682	Ralstonia_pickettii_12J_chromosome_1,_complete_sequence._	Proteobacteria;	Betaproteobacteria	circular	3942557	3709	T4SS	CONJ	T	T4SS_T4CP_MOB_T_1287	2622	2648	virb4@RAPI001c01_026440&0.80912&4.6e-181	traU	t4cp1@RAPI001c01_026390&1&1.9e-24	t4cp2@RAPI001c01_026390&1&9.7e-56	t4cp3	MOBC	MOBF	MOBH	MOBPHEN@RAPI001c01_026220&0.733906&1.5e-26	MOBQ	MOBV	MOBT	MOBB	F_traE	F_traH	F_traK	F_traL	F_traN	F_traU	F_traV	F_traW	F_trbC	G_ICEHIN1056_000310	G_ICEHIN1056_000410	G_ICEHIN1056_000440	G_ICEHIN1056_000510	G_ICEHIN1056_000520	I_traI	I_traK	I_traL	I_traM	I_traN	I_traP	I_traQ	I_traR	I_traW	I_traY
NC_012856	Ralstonia_pickettii_12D_chromosome_1,_complete_genome._	Proteobacteria;	Betaproteobacteria	circular	3647724	3411	T4SS	CONJ	G	T4SS_T4CP_MOB_G_1289	658	684	virb4@RAPI002c01_006730&0.828208&1.6e-97	traU	t4cp1@RAPI002c01_006630&0.990909&1.1e-10	t4cp2@RAPI002c01_006630&0.963964&2.7e-30	t4cp3	MOBC	MOBF	MOBH@RAPI002c01_006840&0.916667&6.5e-42	MOBPHEN	MOBQ	MOBV	MOBT	MOBB	F_traE	F_traH	F_traK	F_traL	F_traN	F_traU	F_traV	F_traW	F_trbC	G_ICEHIN1056_000310@RAPI002c01_006580&0.866337&2.4e-56	G_ICEHIN1056_000410@RAPI002c01_006690&0.959276&1.1e-105	G_ICEHIN1056_000440@RAPI002c01_006720&0.992754&5.9e-64	G_ICEHIN1056_000510@RAPI002c01_006780&0.989059&2.9e-196	G_ICEHIN1056_000520@RAPI002c01_006770&0.978852&1.7e-149	I_traI	I_traK	I_traL	I_traM	I_traN	I_traP	I_traQ	I_traR	I_traW	I_traY
NC_012856	Ralstonia_pickettii_12D_chromosome_1,_complete_genome._	Proteobacteria;	Betaproteobacteria	circular	3647724	3411	NOT4SS	MOB	O	NOT4SS_NOT4CP_MOB_O_1290	774	774	virb4	traU	t4cp1	t4cp2	t4cp3	MOBC	MOBF	MOBH	MOBPHEN@RAPI002c01_007740&0.969957&3.5e-27	MOBQ	MOBV	MOBT	MOBB	F_traE	F_traH	F_traK	F_traL	F_traN	F_traU	F_traV	F_traW	F_trbC	G_ICEHIN1056_000310	G_ICEHIN1056_000410	G_ICEHIN1056_000440	G_ICEHIN1056_000510	G_ICEHIN1056_000520	I_traI	I_traK	I_traL	I_traM	I_traN	I_traP	I_traQ	I_traR	I_traW	I_traY
NC_003295	Ralstonia_solanacearum_GMI1000,_complete_genome._	Proteobacteria;	Betaproteobacteria	circular	3716413	3440	T4SS	CONJ	T	T4SS_T4CP_MOB_T_1293	2621	2646	virb4@RASO001c01_026260&0.822906&8.7e-183	traU	t4cp1@RASO001c01_026310&1&4.8e-25	t4cp2@RASO001c01_026310&1&2.7e-55	t4cp3	MOBC	MOBF	MOBH	MOBPHEN@RASO001c01_026460&0.875536&2.4e-23	MOBQ	MOBV	MOBT	MOBB	F_traE	F_traH	F_traK	F_traL	F_traN	F_traU	F_traV	F_traW	F_trbC	G_ICEHIN1056_000310	G_ICEHIN1056_000410	G_ICEHIN1056_000440	G_ICEHIN1056_000510	G_ICEHIN1056_000520	I_traI	I_traK	I_traL	I_traM	I_traN	I_traP	I_traQ	I_traR	I_traW	I_traY
NC_014034	Rhodobacter_capsulatus_SB1003_chromosome,_complete_genome._	Proteobacteria;	Alphaproteobacteria	circular	3738958	3493	NOT4SS	MOB	O	NOT4SS_NOT4CP_MOB_O_1296	1296	1296	virb4	traU	t4cp1	t4cp2	t4cp3	MOBC	MOBF	MOBH	MOBPHEN@RHCA001c01_012960&0.935622&5.6e-33	MOBQ	MOBV	MOBT	MOBB	F_traE	F_traH	F_traK	F_traL	F_traN	F_traU	F_traV	F_traW	F_trbC	G_ICEHIN1056_000310	G_ICEHIN1056_000410	G_ICEHIN1056_000440	G_ICEHIN1056_000510	G_ICEHIN1056_000520	I_traI	I_traK	I_traL	I_traM	I_traN	I_traP	I_traQ	I_traR	I_traW	I_traY
NC_007761	Rhizobium_etli_CFN_42,_complete_genome._	Proteobacteria;	Alphaproteobacteria	circular	4381608	4035	NOT4SS	MOB	O	NOT4SS_NOT4CP_MOB_O_1300	722	722	virb4	traU	t4cp1	t4cp2	t4cp3	MOBC	MOBF@RHET001c01_007220&0.714773&5.6e-77	MOBH	MOBPHEN	MOBQ@RHET001c01_007220&1&8.5e-71	MOBV	MOBT	MOBB	F_traE	F_traH	F_traK	F_traL	F_traN	F_traU	F_traV	F_traW	F_trbC	G_ICEHIN1056_000310	G_ICEHIN1056_000410	G_ICEHIN1056_000440	G_ICEHIN1056_000510	G_ICEHIN1056_000520	I_traI	I_traK	I_traL	I_traM	I_traN	I_traP	I_traQ	I_traR	I_traW	I_traY
[truncated: 281 more rows]
[truncated: 4 more columns]

## Sheet: PSC
id	plasmid	species	clade	clade	type	genome size	# genes	T4SS?	CONJ?	MPF	Class	VirB4	TraU	T4CP_profile1	T4CP_profile2	T4CP_Tn916
[truncated: 427 more rows]
[truncated: 3 more columns]

## Sheet: PSA
id	plasmid	species	clade	clade	type	genome size	# genes	T4SS?	CONJ?	MPF	Class	VirB4	TraU	T4CP_profile1	T4CP_profile2	T4CP_Tn916
[truncated: 497 more rows]
[truncated: 3 more columns]

## Sheet: chrom proteins
ID	from	to	sense	synonyms	synonyms	synonyms
ACAV001c01_004780	527741	529141	C	Aave_0489	_YP_968869.1_	Aave_0489
ACAV001c01_004790	529162	530091	C	Aave_0490	_YP_968870.1_	Aave_0490
[truncated: 3,755 more rows]

## Sheet: PSC proteins
ID	from	to	sense	id2	synonyms	synonyms
[truncated: 1,902 more rows]

[truncated: 1 more sheets: PSA proteins]
